# Supplementary material
Source: PubMed Central journal article supplement (PMC5570525)

## Supplementary Information Figure 1

### SDF4

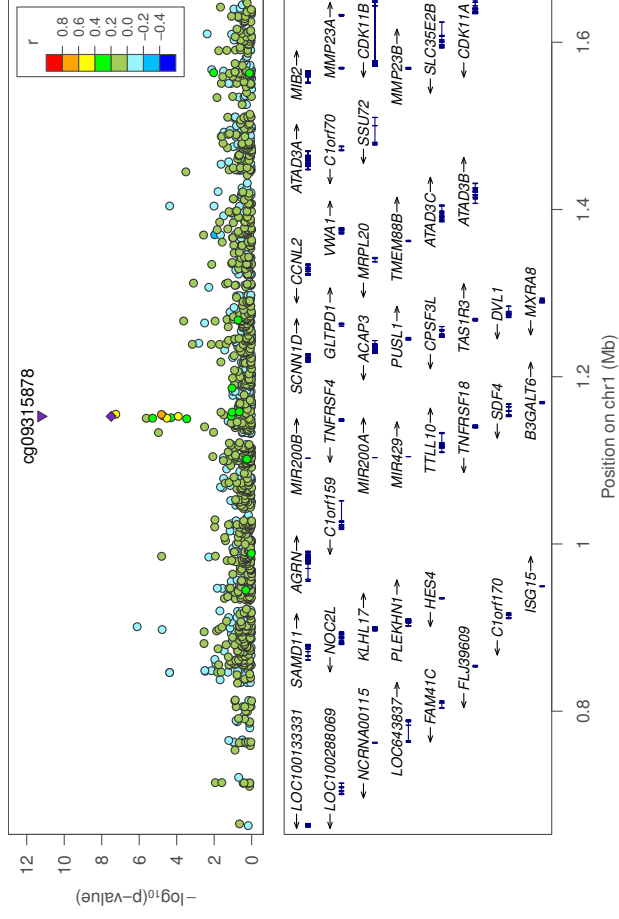

### WRAP73

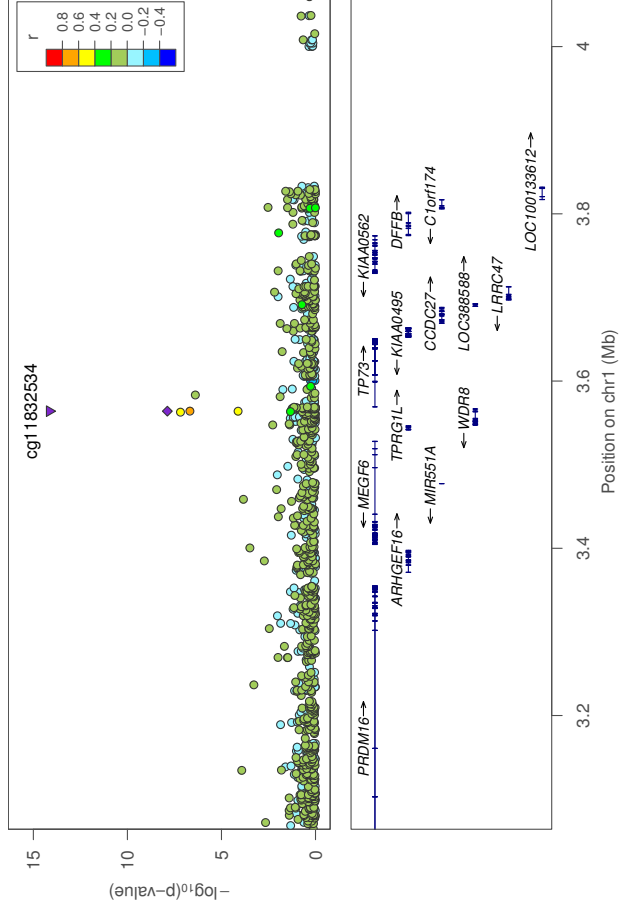

### C1orf127

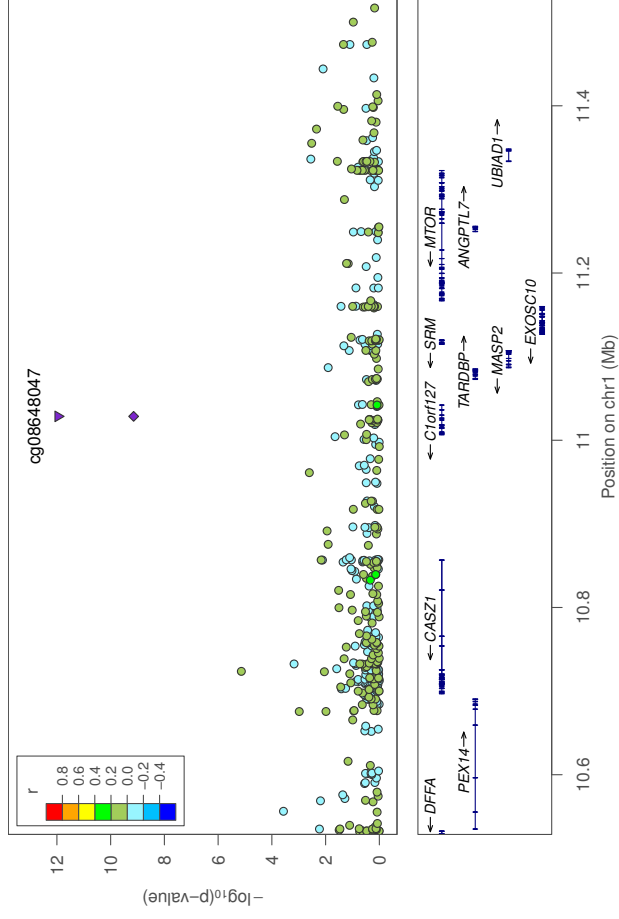

### SPATA21

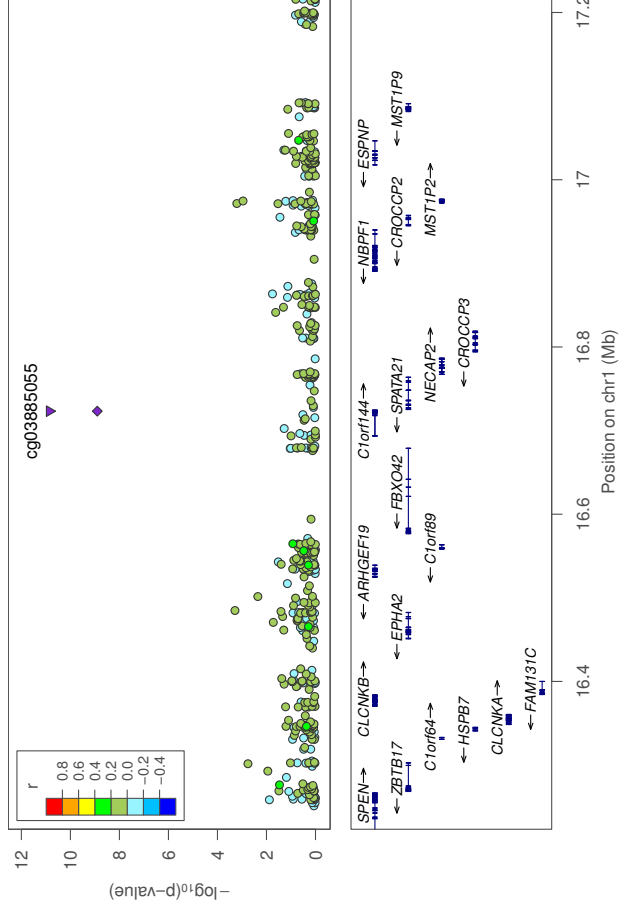

# AHDC1

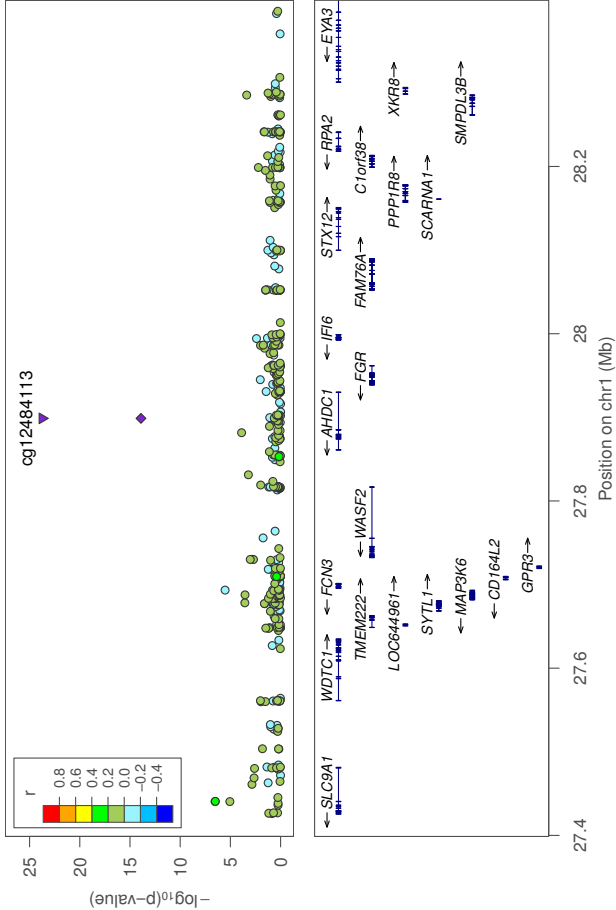

# KIAA0319L

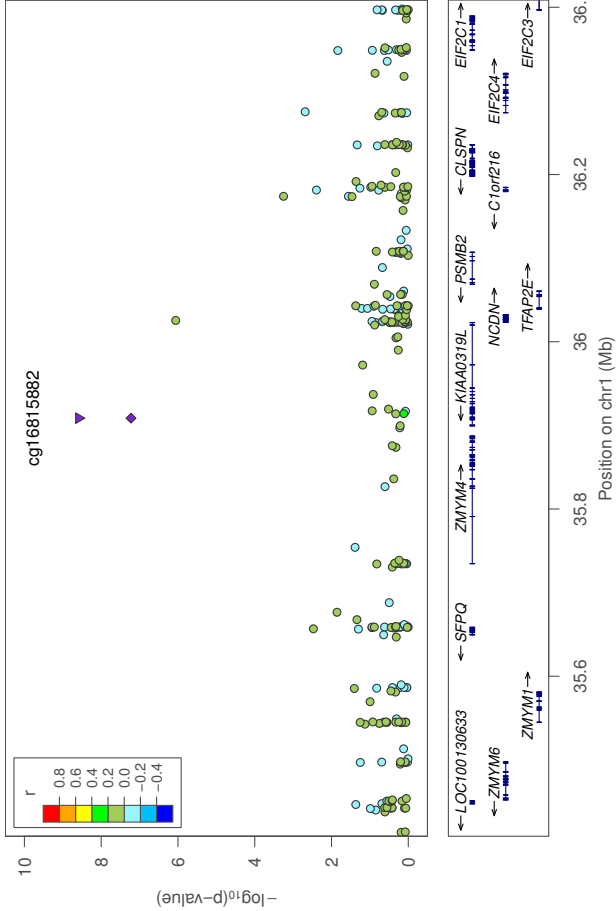

# STK40

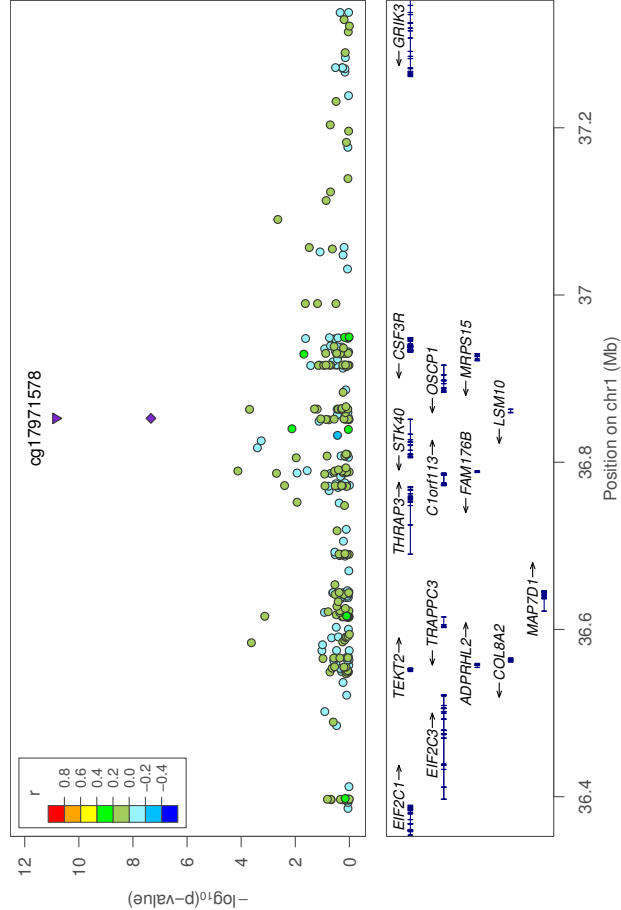

# TIE1

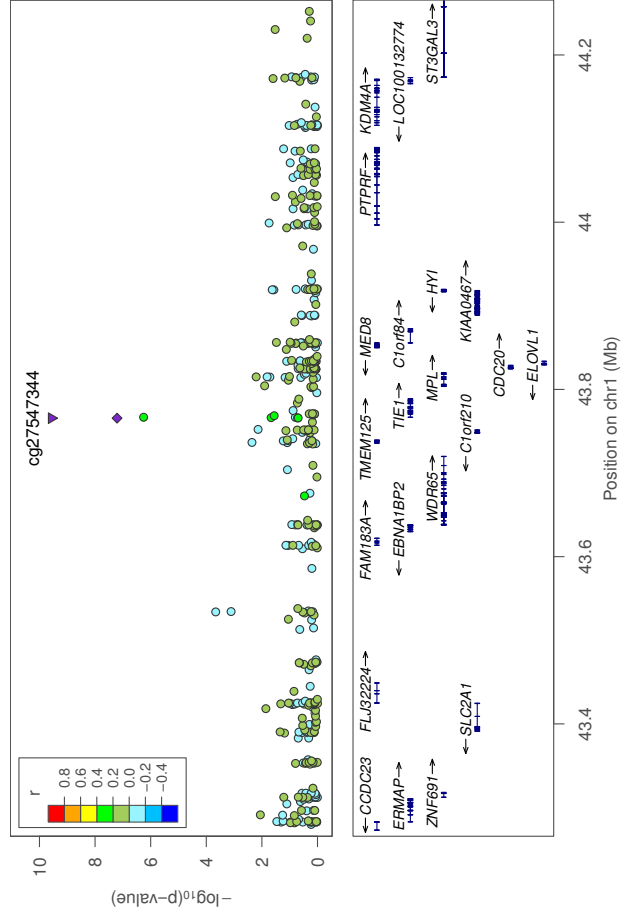

### DHCR24

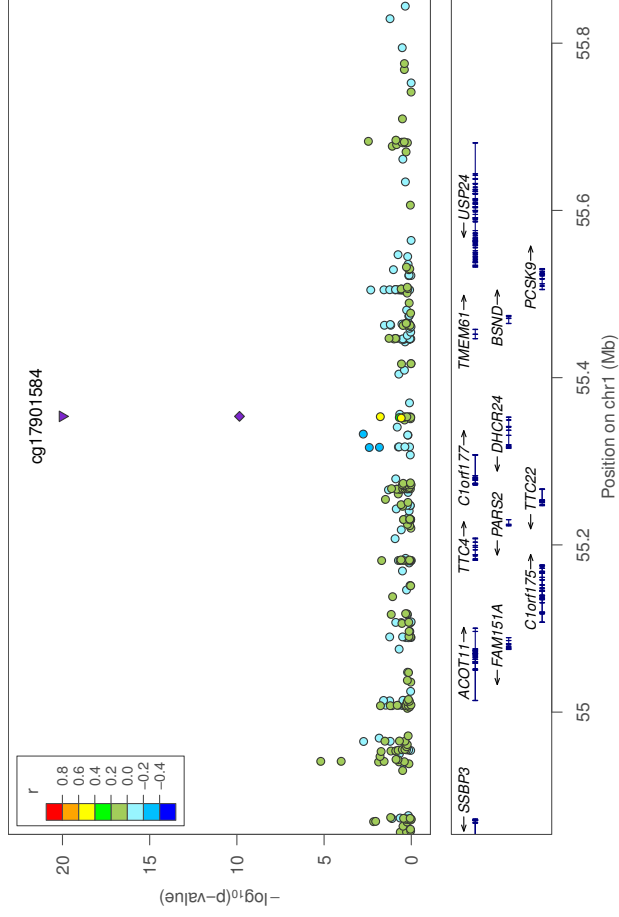

### NFIA

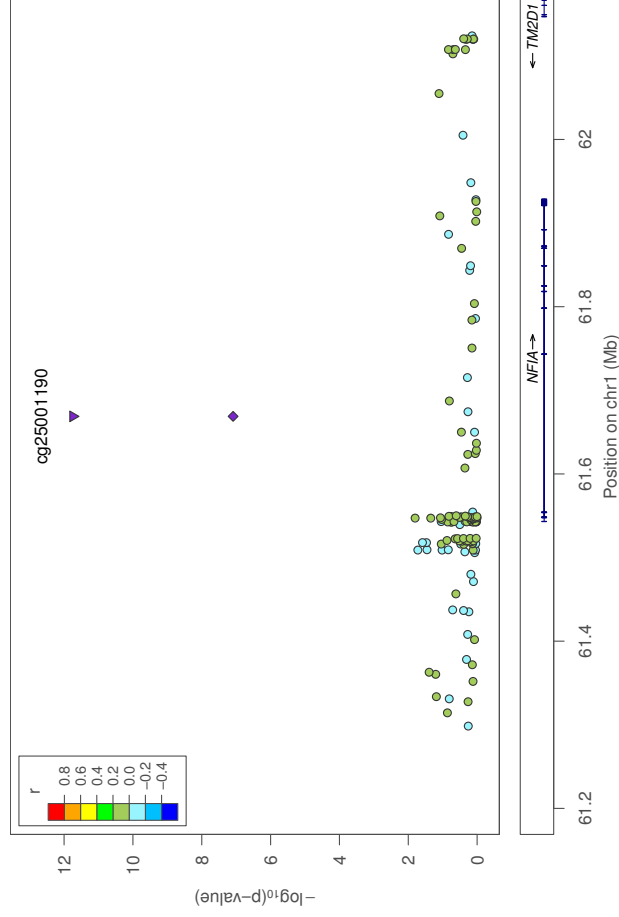

### PHBP3

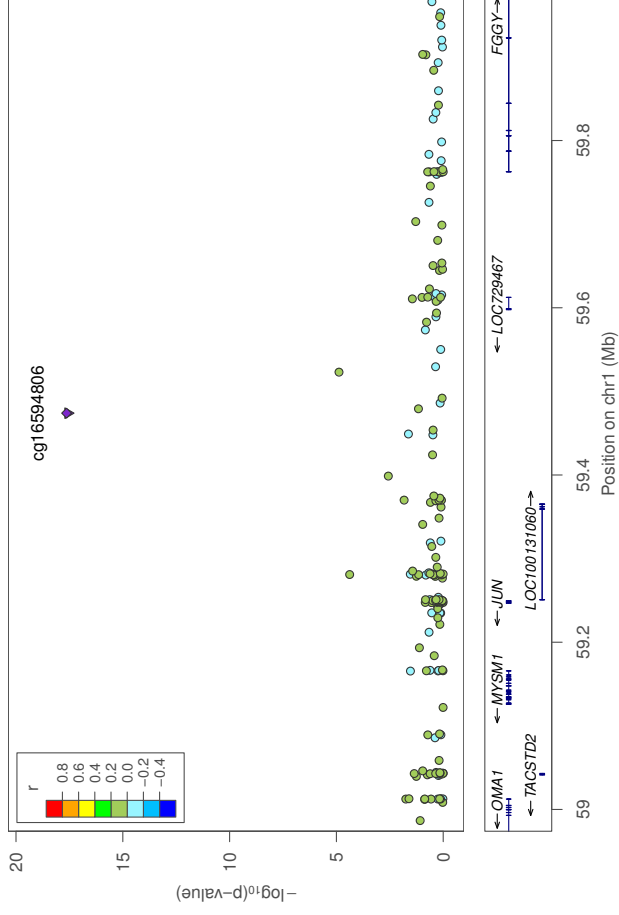

### S1PR1

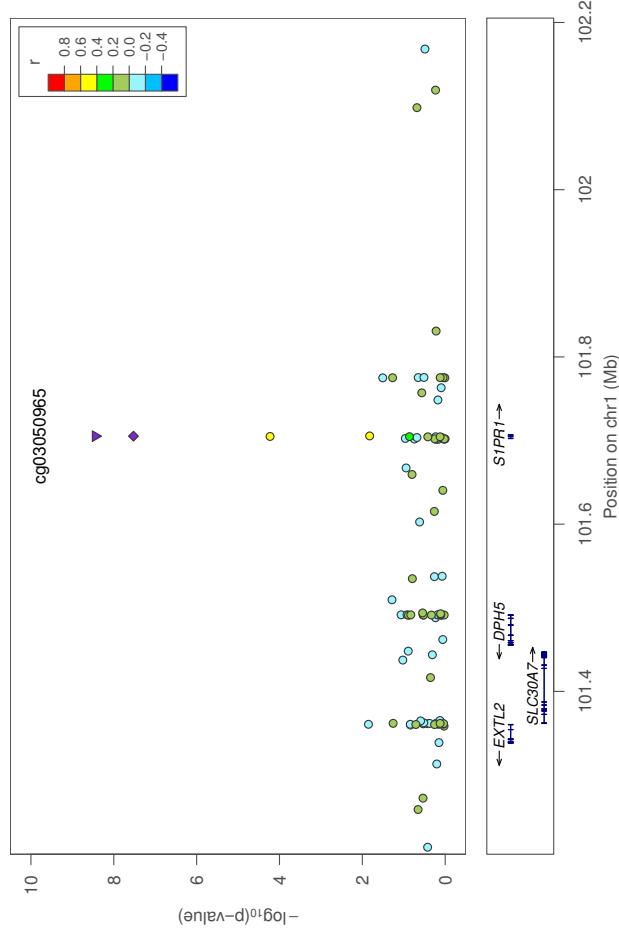

## SARS

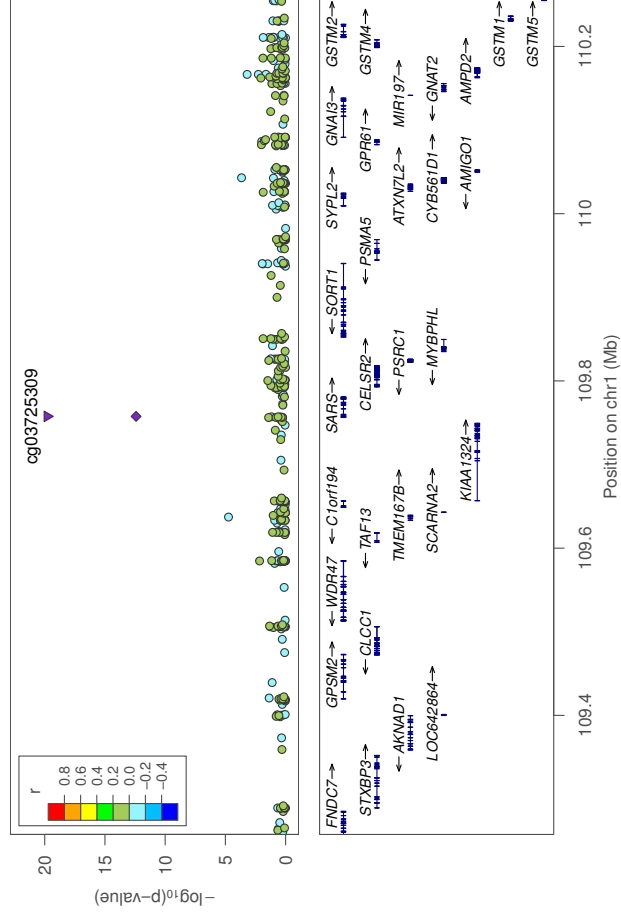

## PHGDH

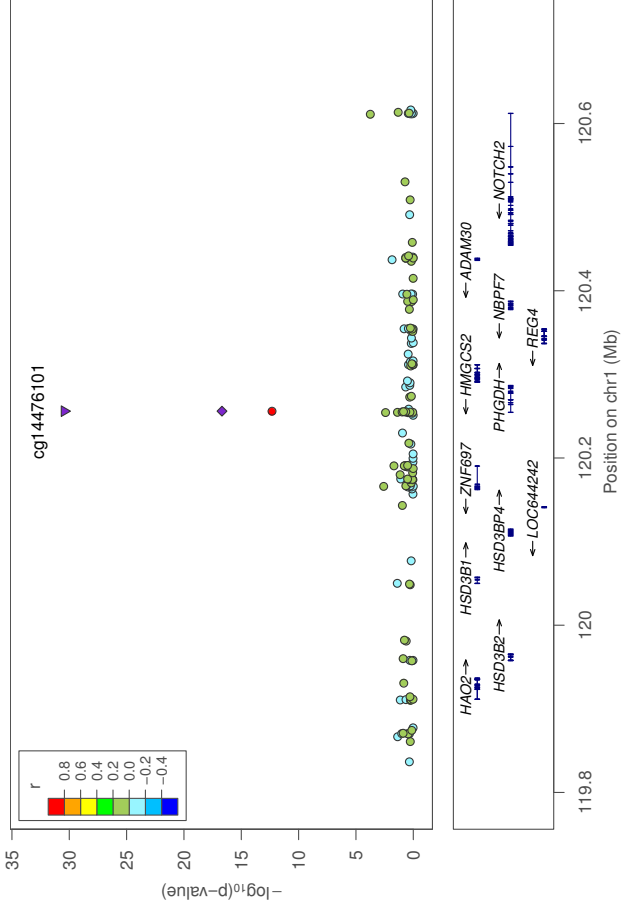

## PDE4DIP

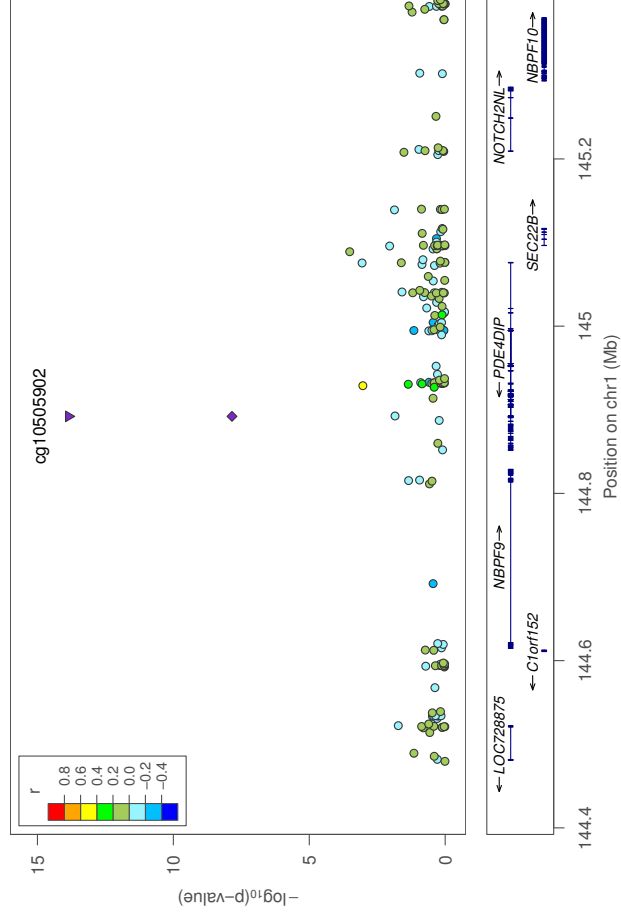

## S100A2

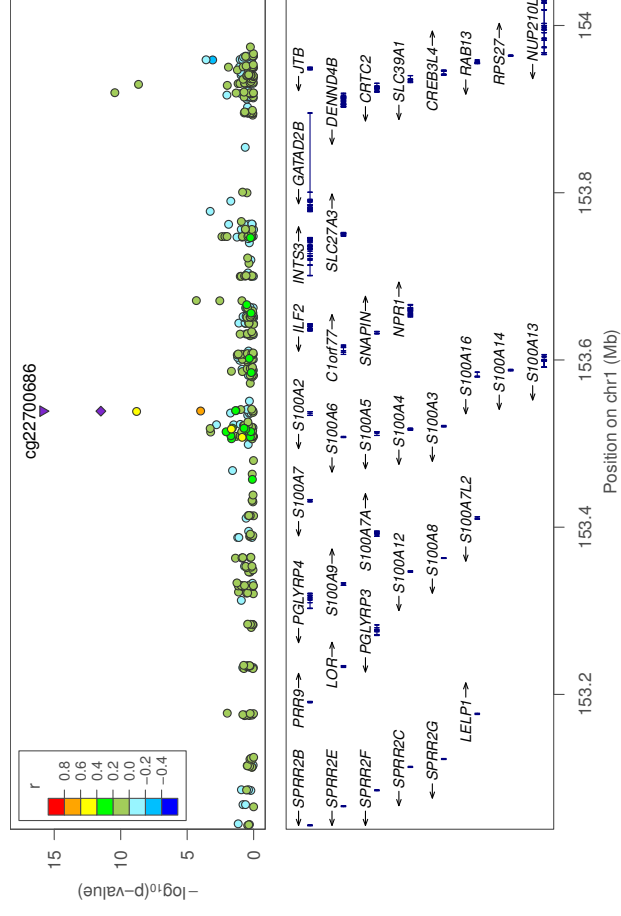

## LMNA

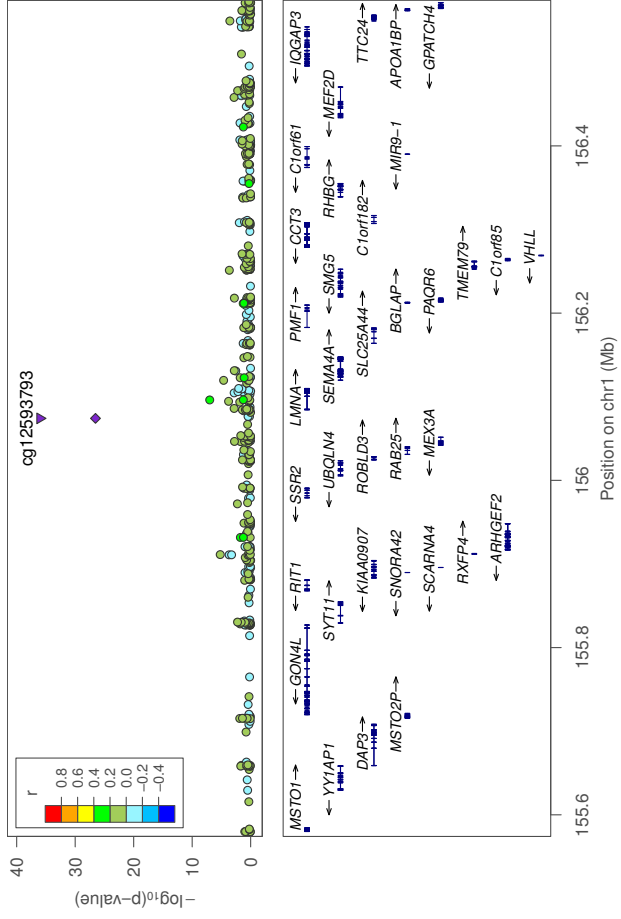

## BCAN

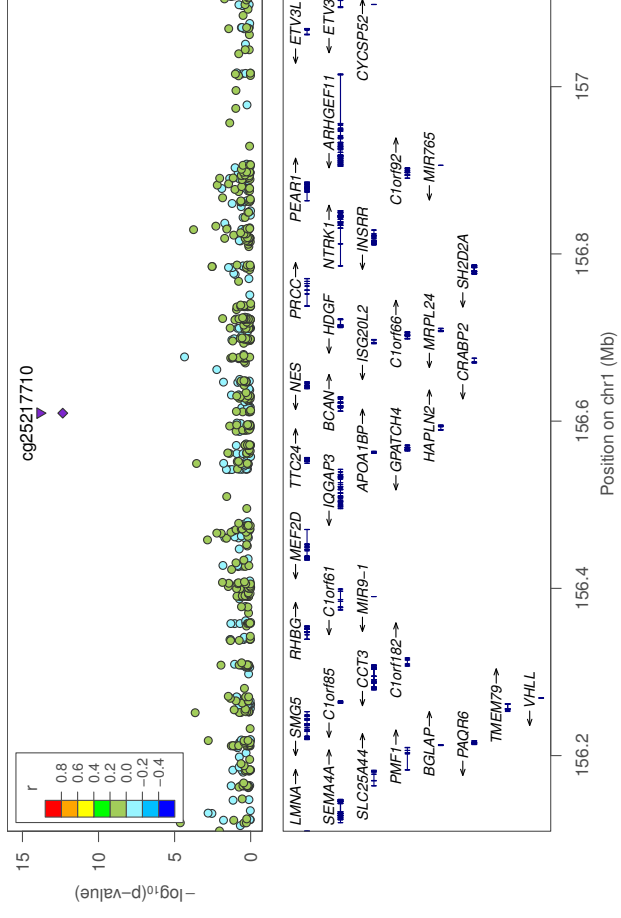

## DARC

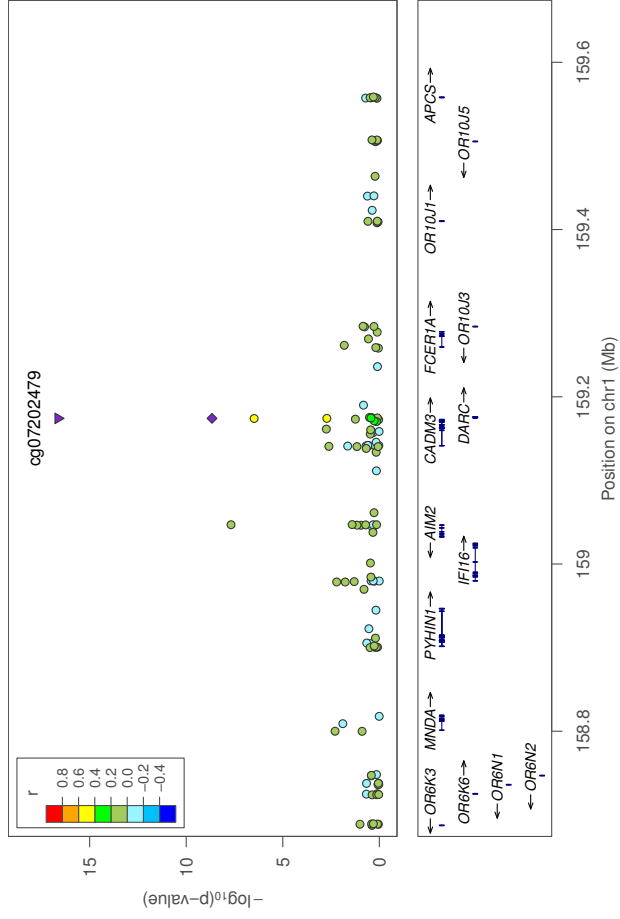

## CD247

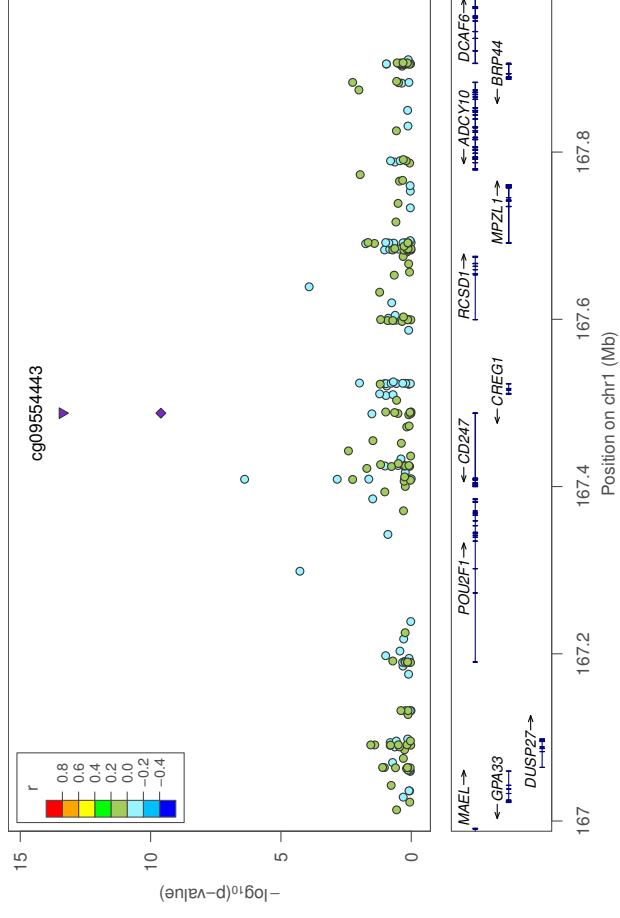

### RPS10P7

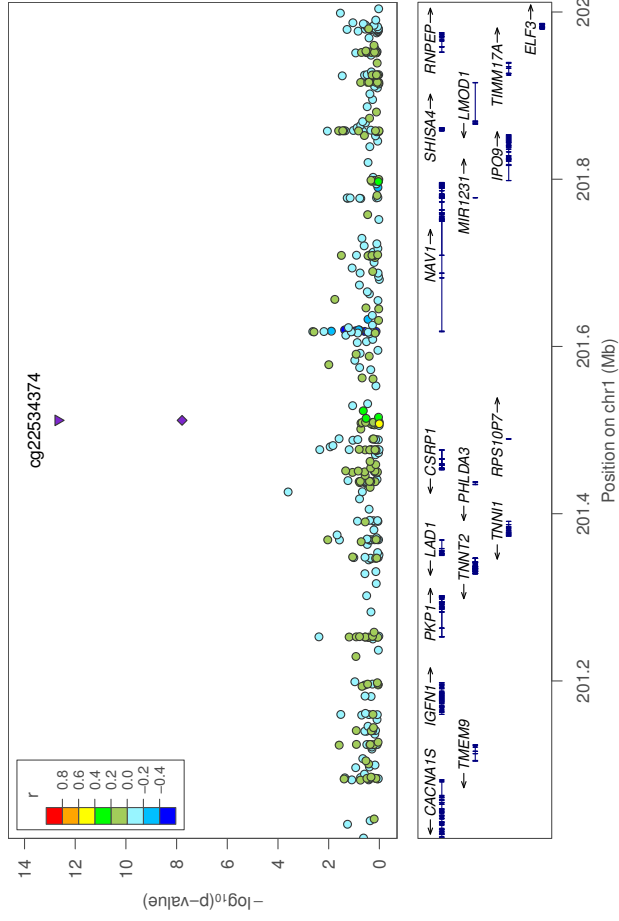

### SLC41A1

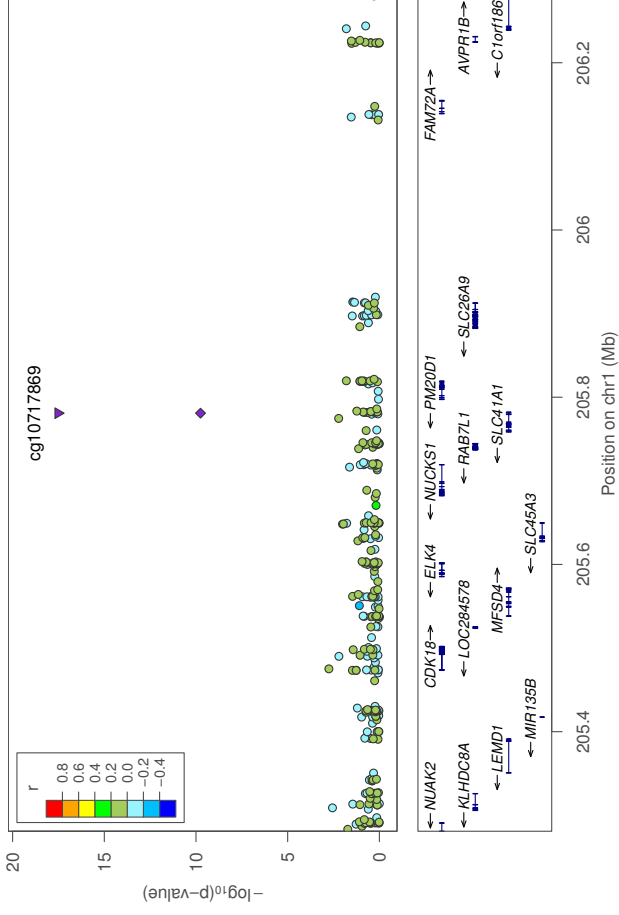

### TMEM63A

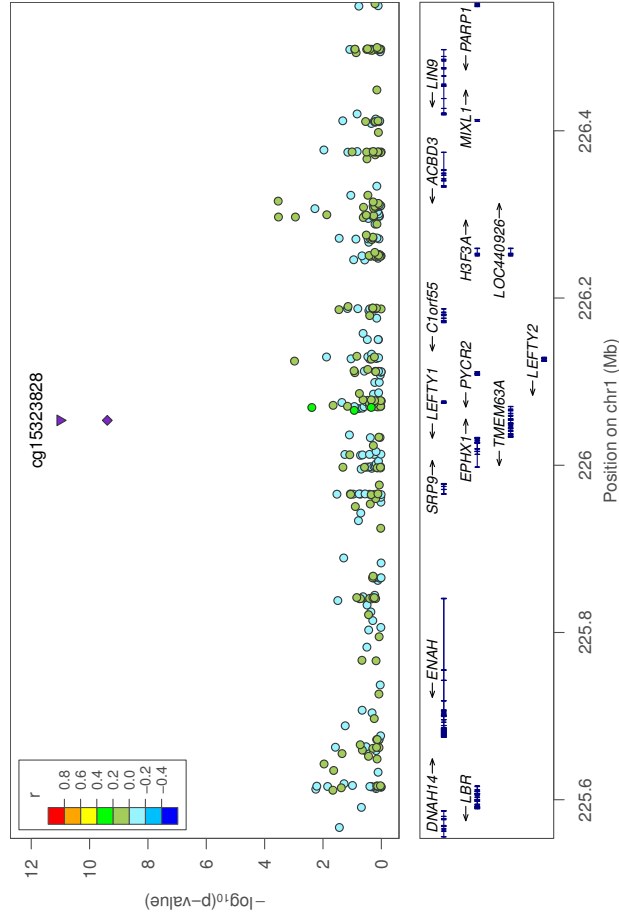

### LINC00184

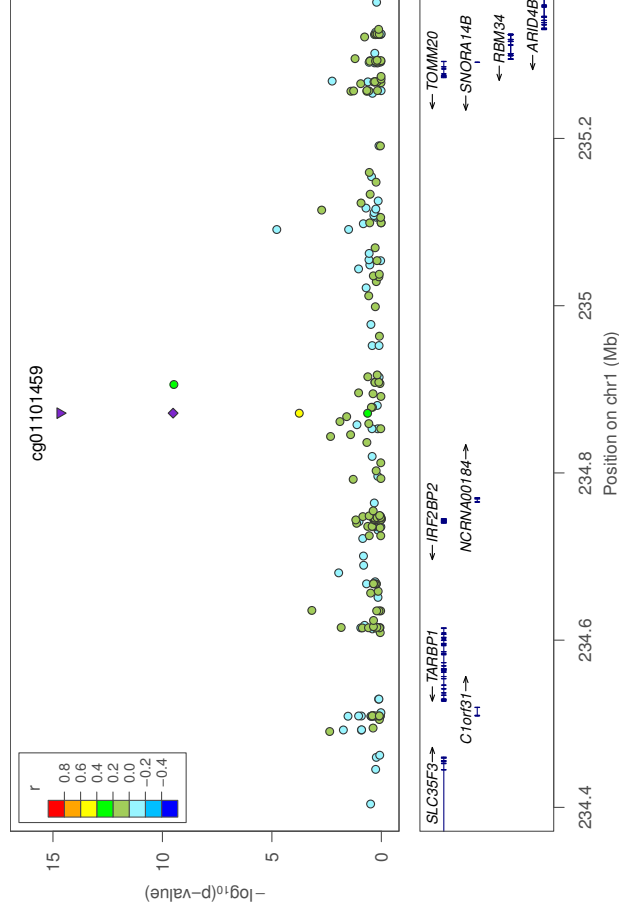

### LPIN1

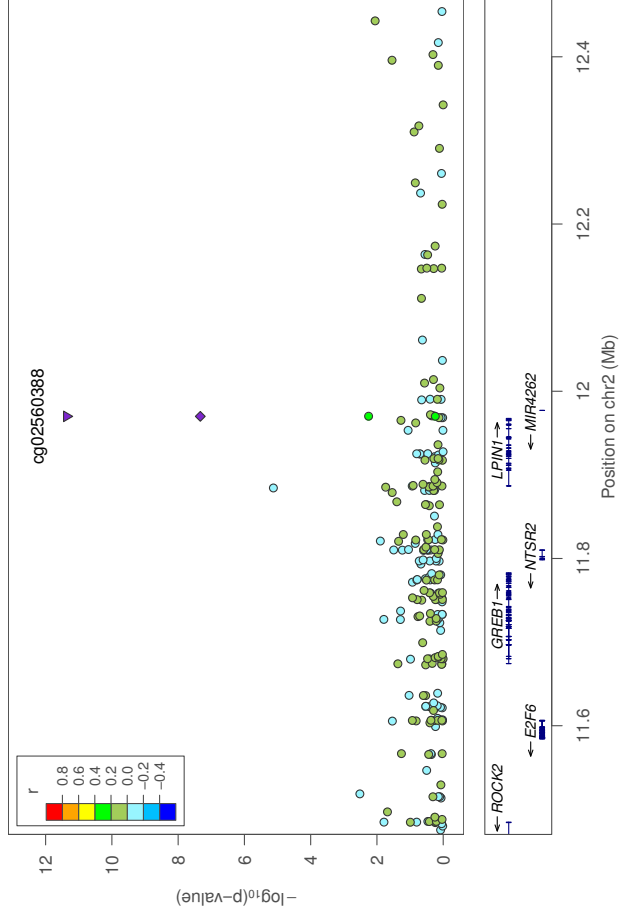

### RNA5SP89

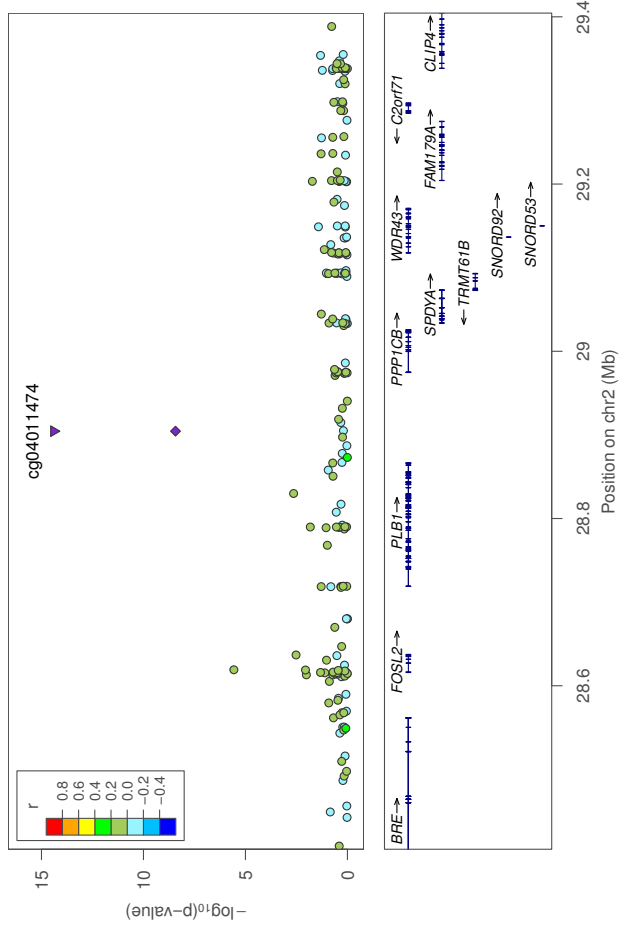

### LBH

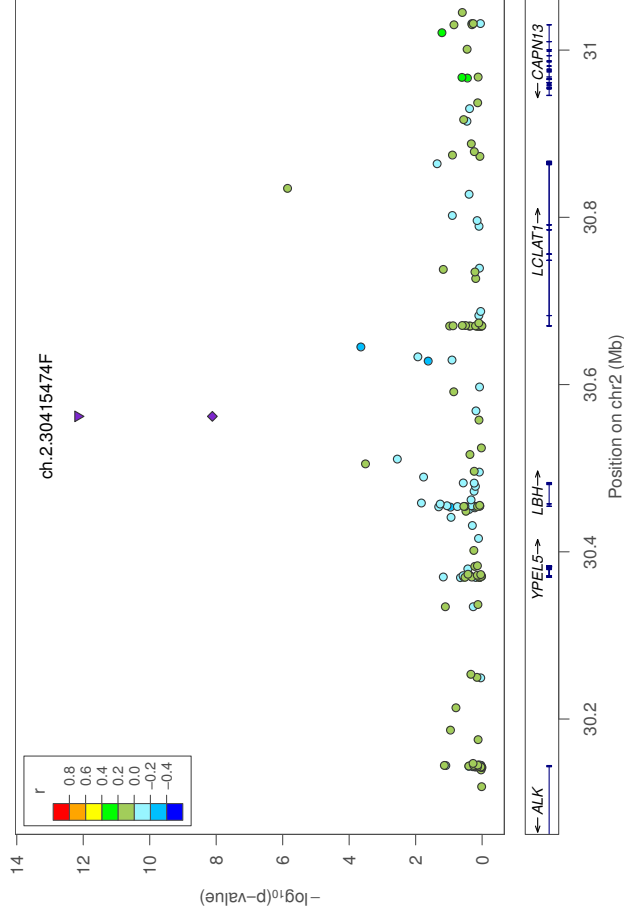

### CDC42EP3

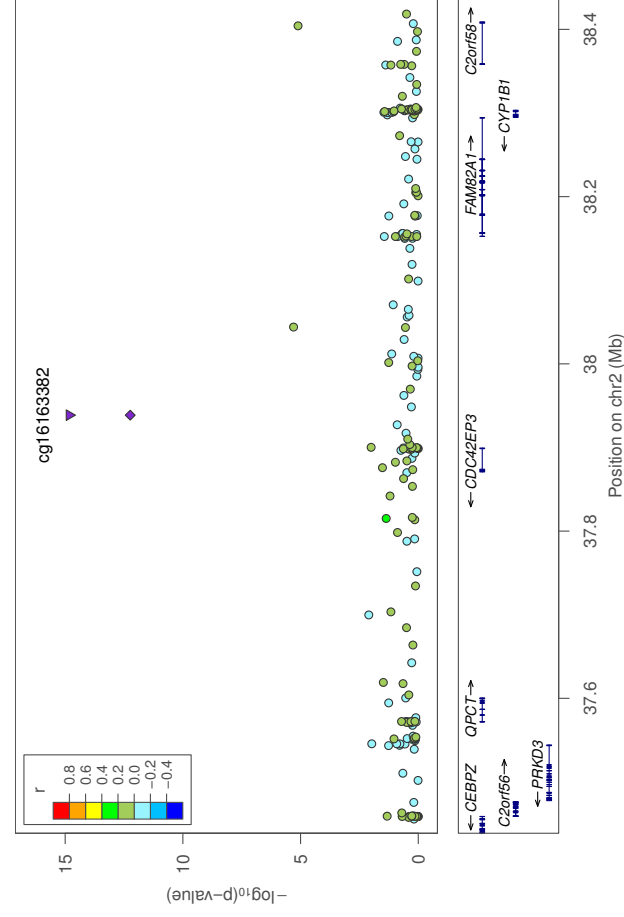



## TGFA

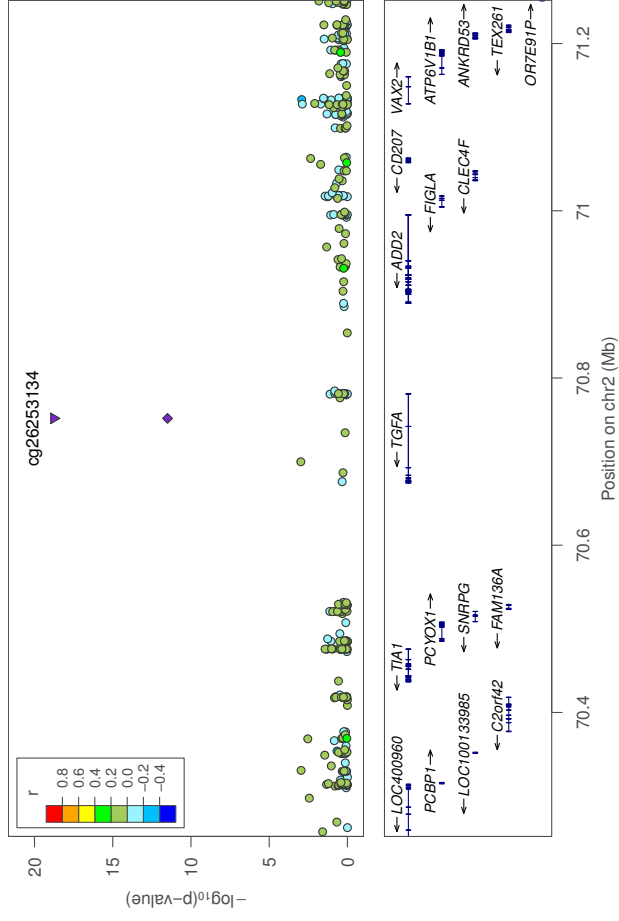

## MAP3K2

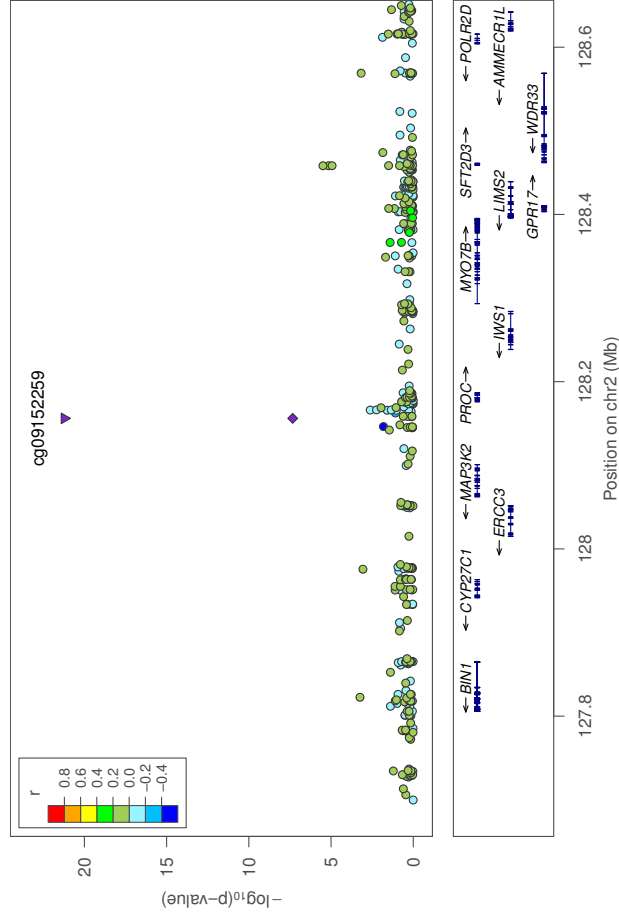

## SULT1C2

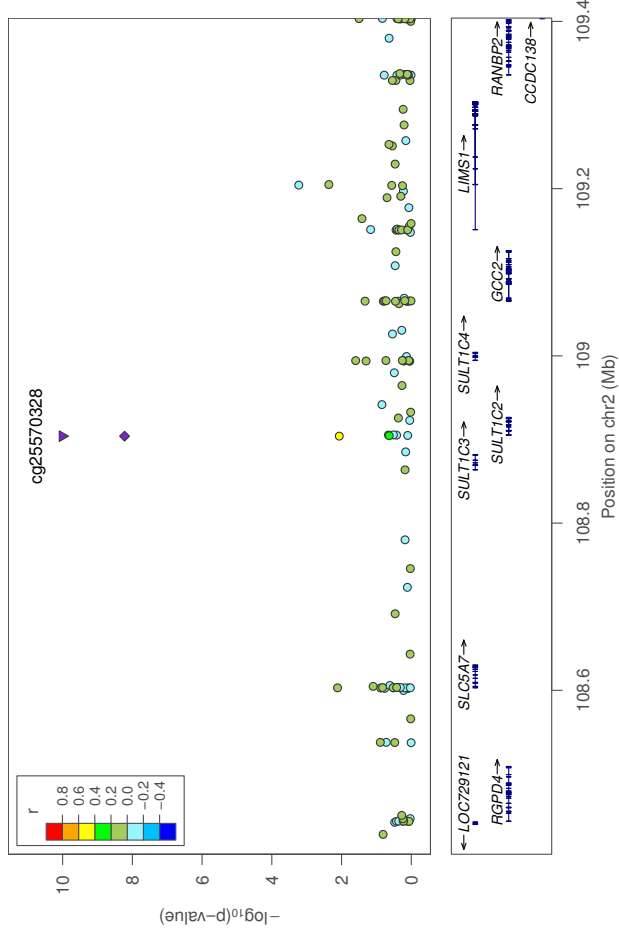

## UGGT1

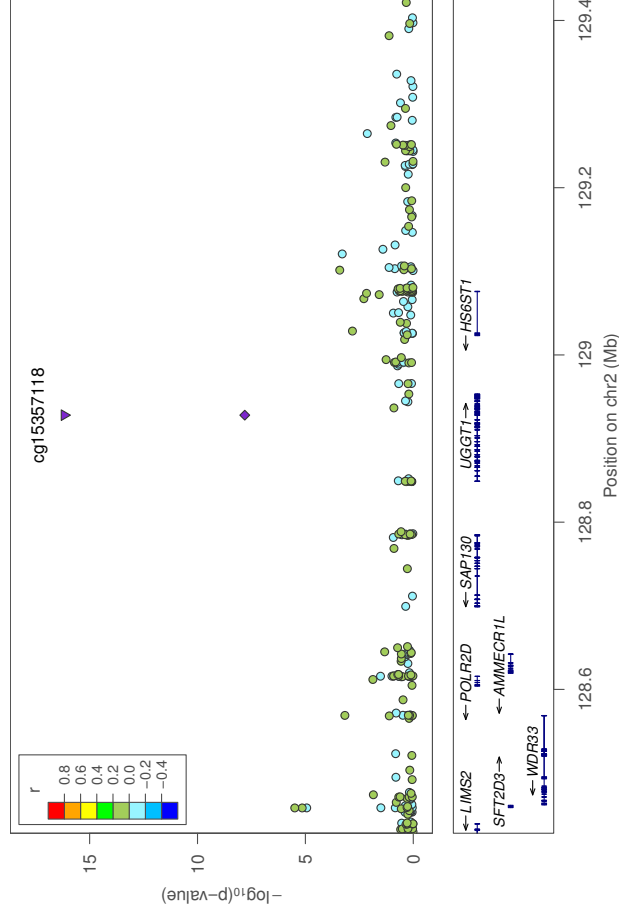

## ZEB2

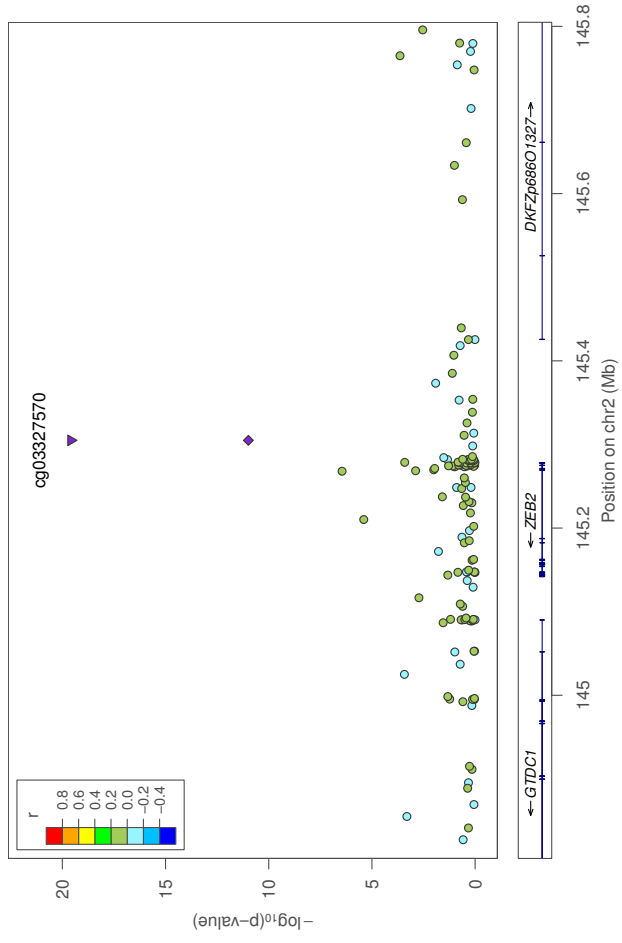

## NFE2L2

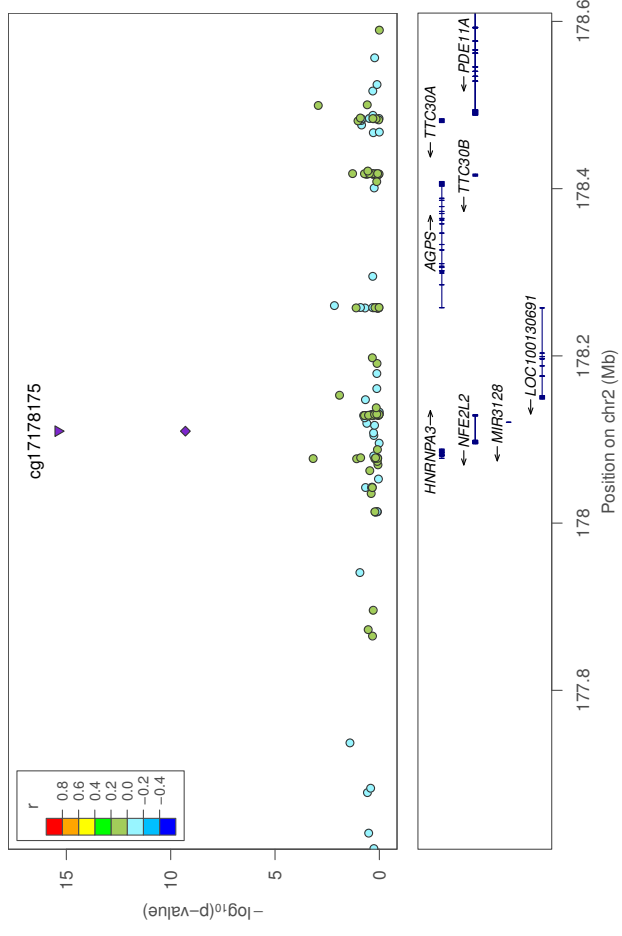

## FTH1P20

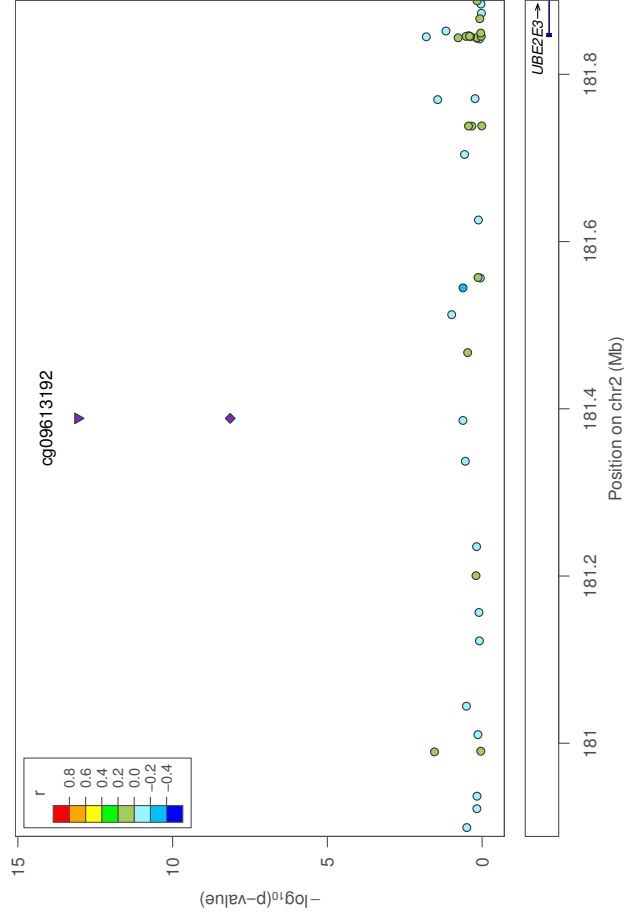

## CRYGFP

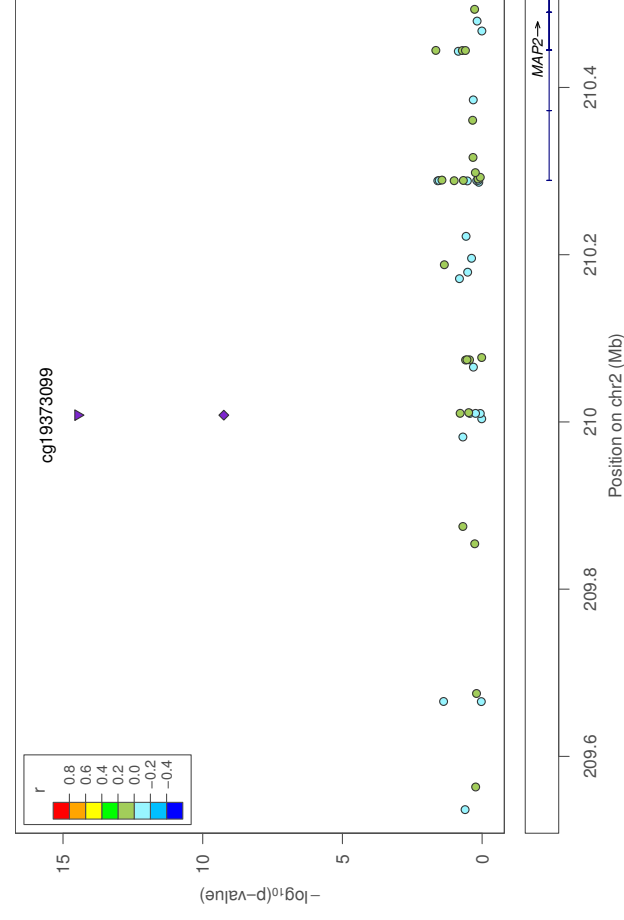

## SLC11A1

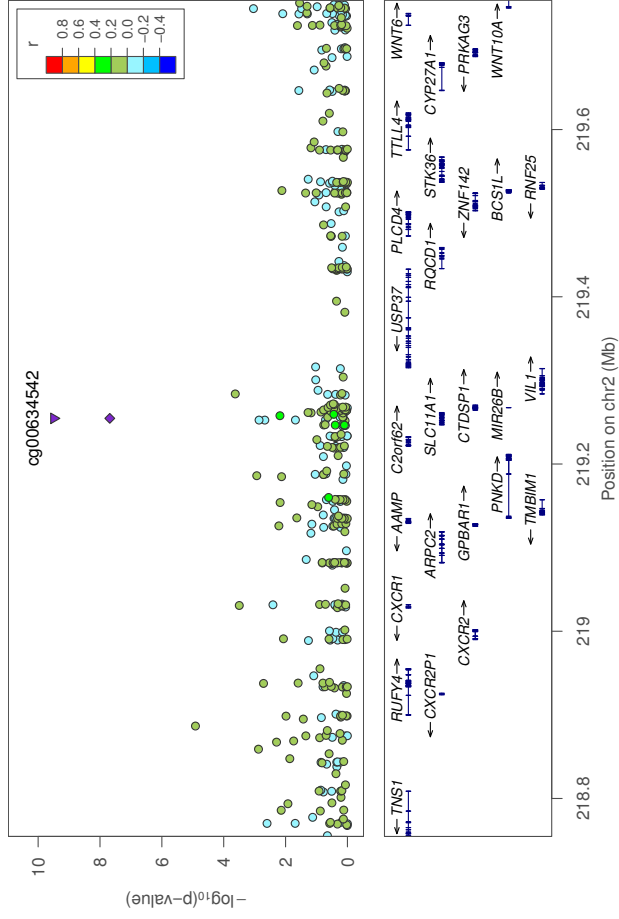

## HDAC4

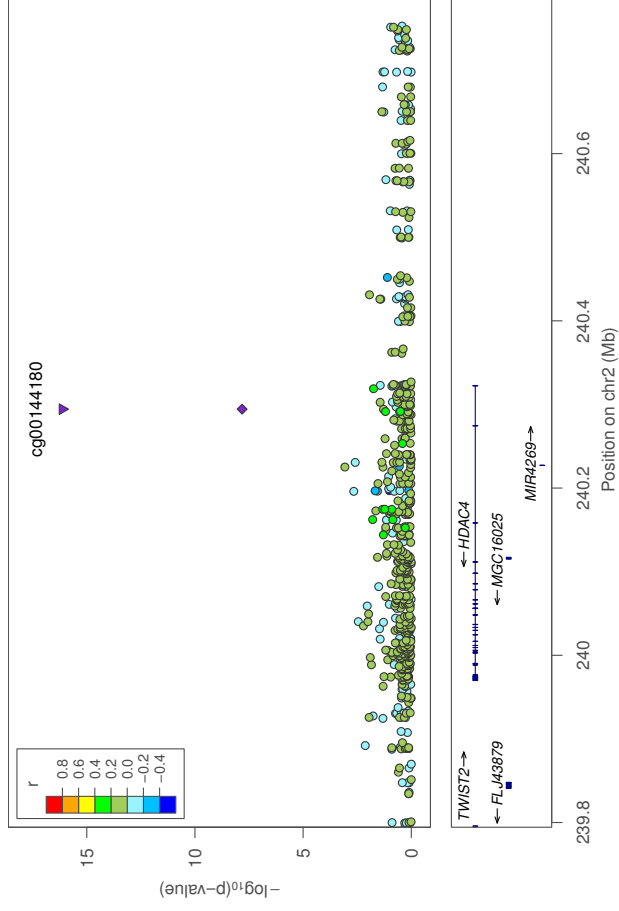

## IL5RA

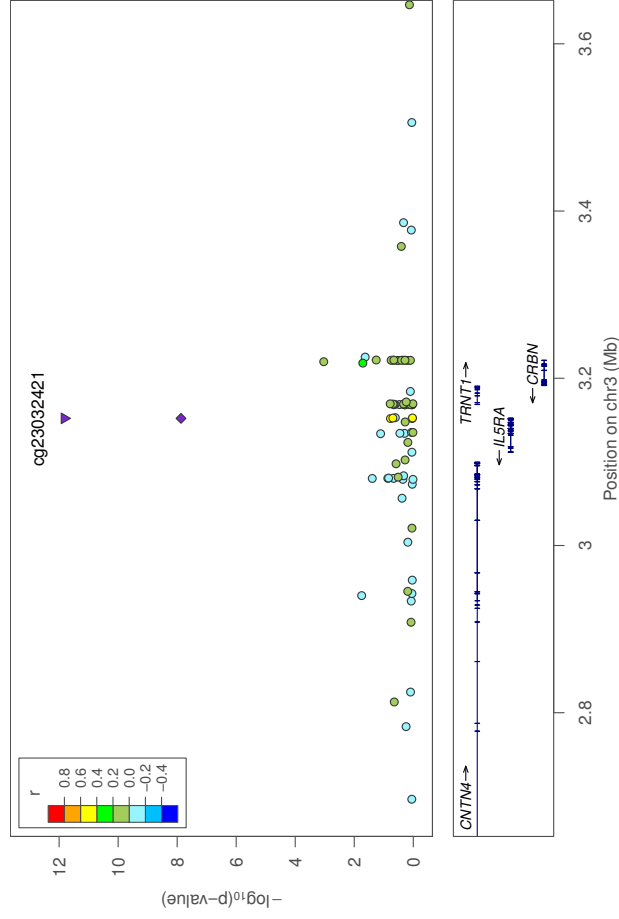

## DLEC1

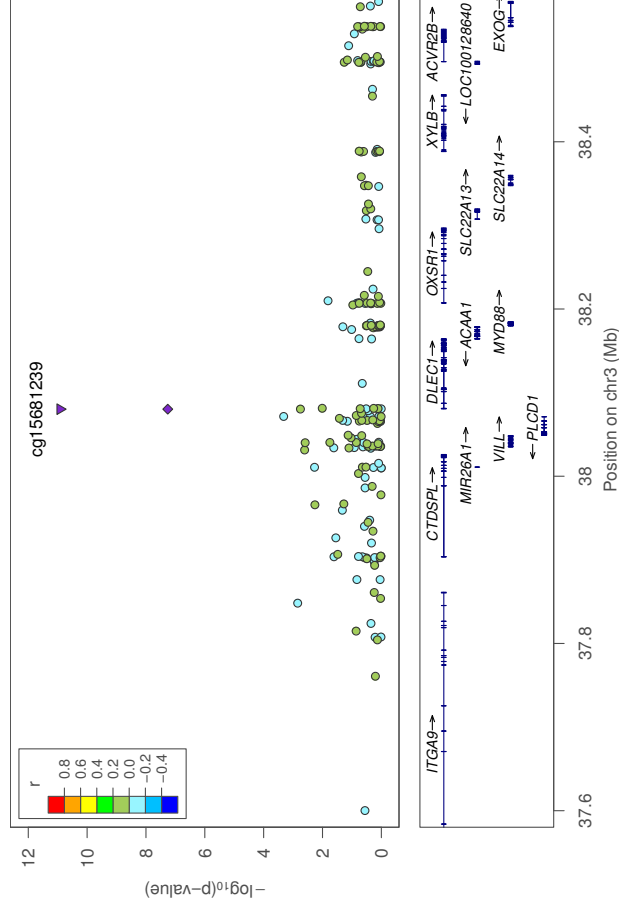

## KLHL18

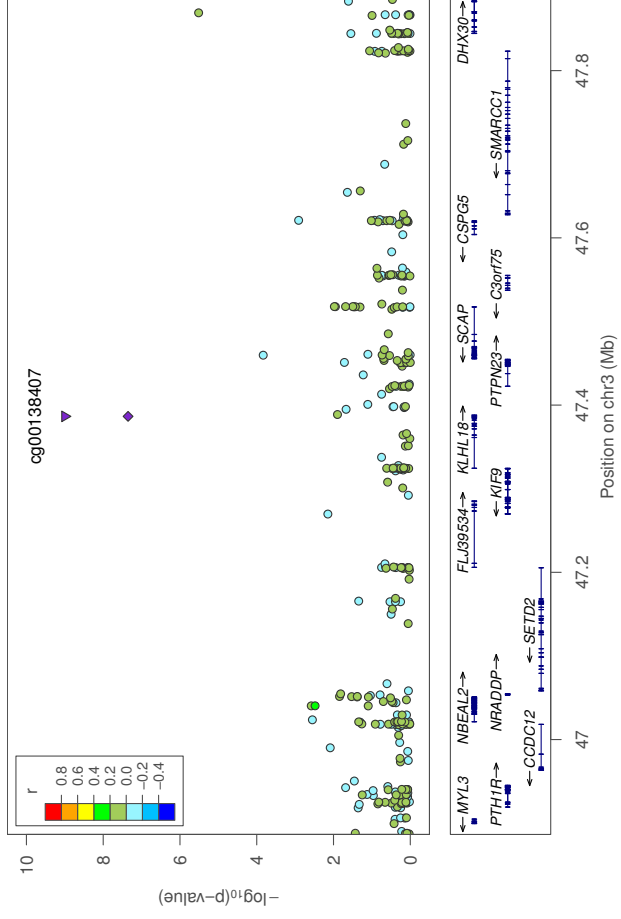

## ACO2

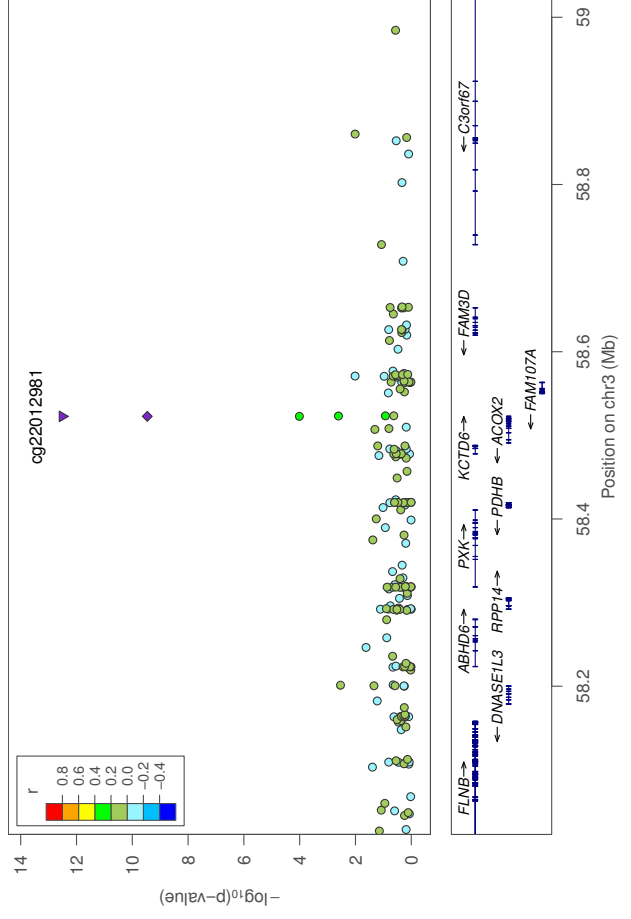

## NT5DC2

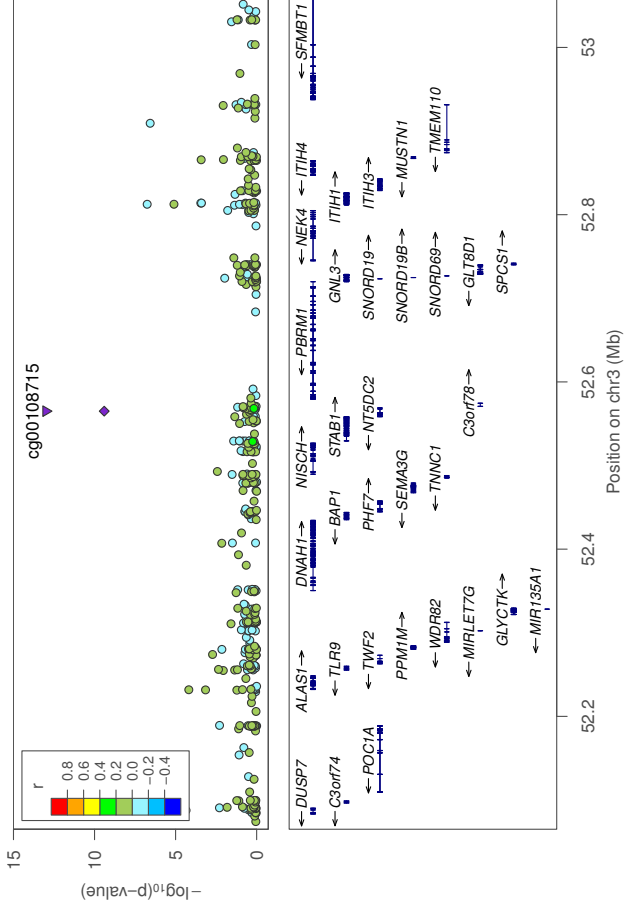

## PRICKLE2

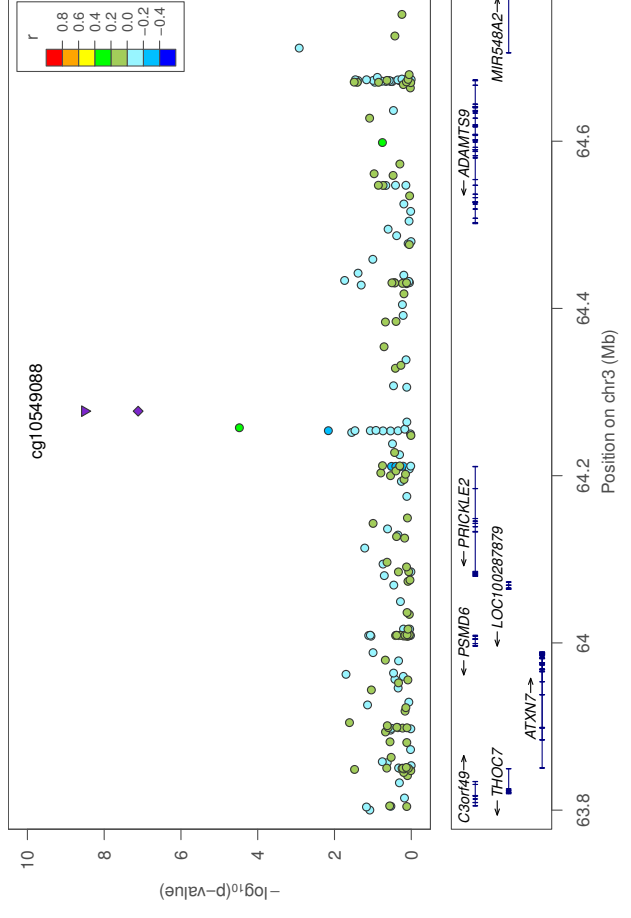

### ZPLD1

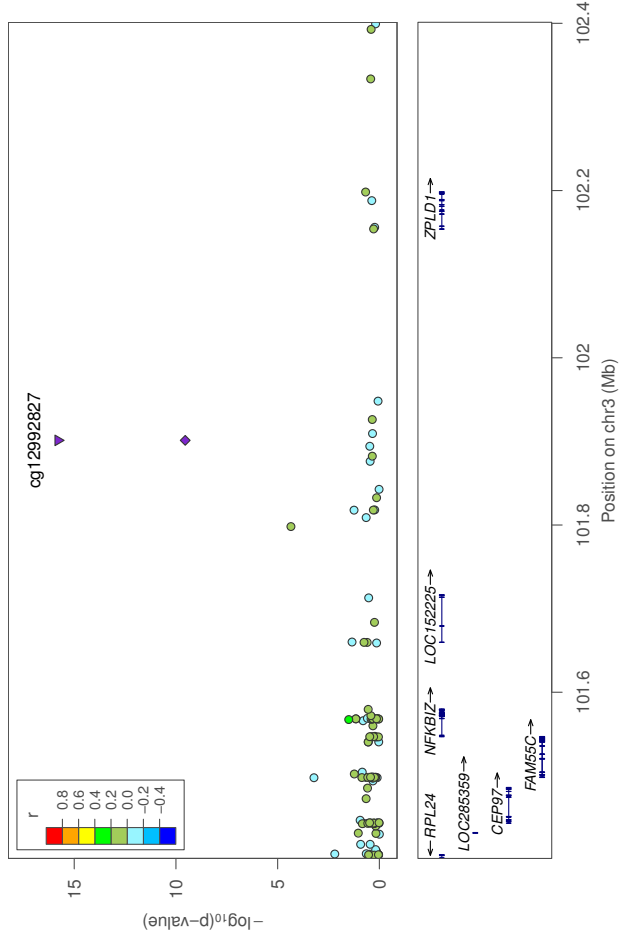

### EAF2

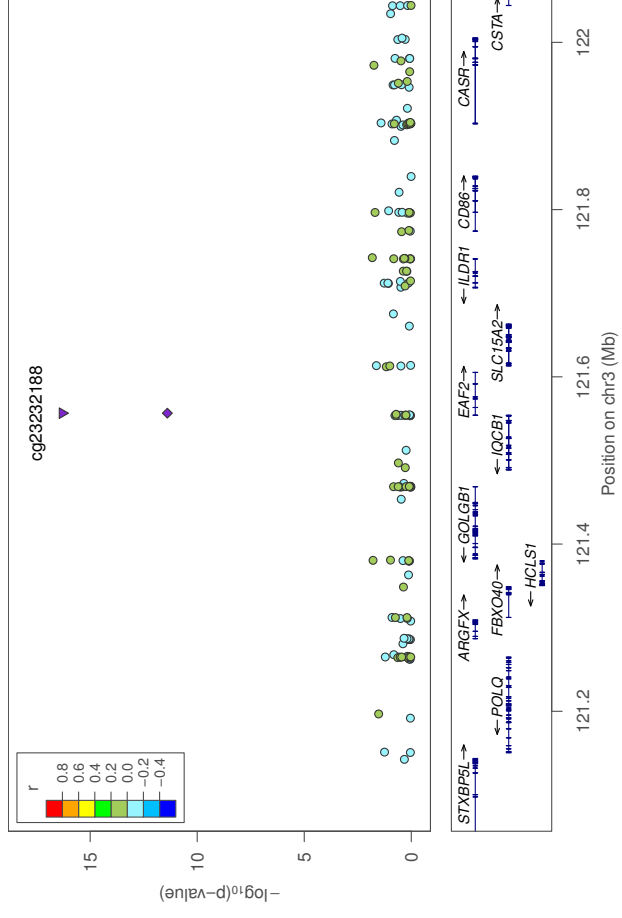

### EEFSEC

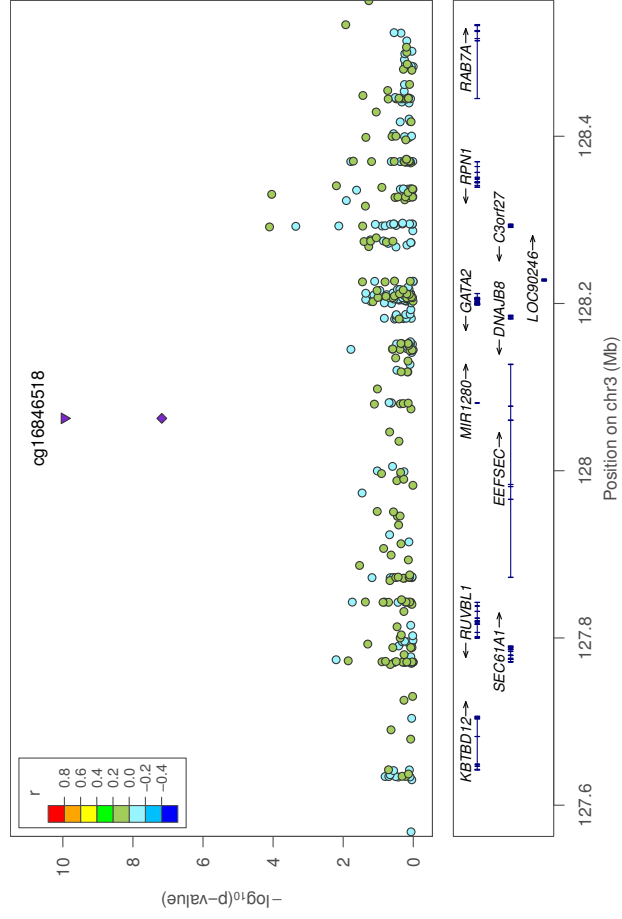

### EFCC1

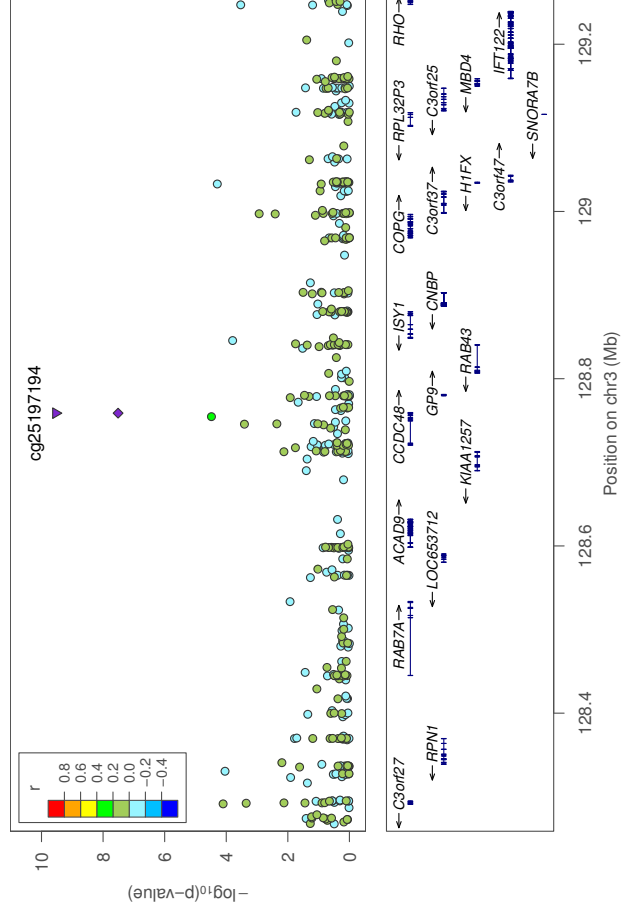

### LINC00880

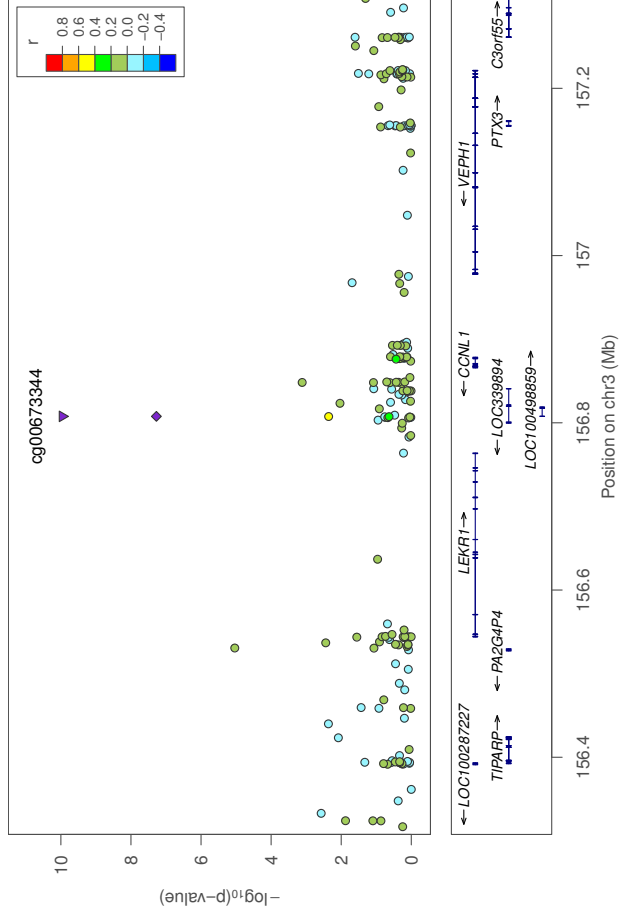

### SOX2-OT

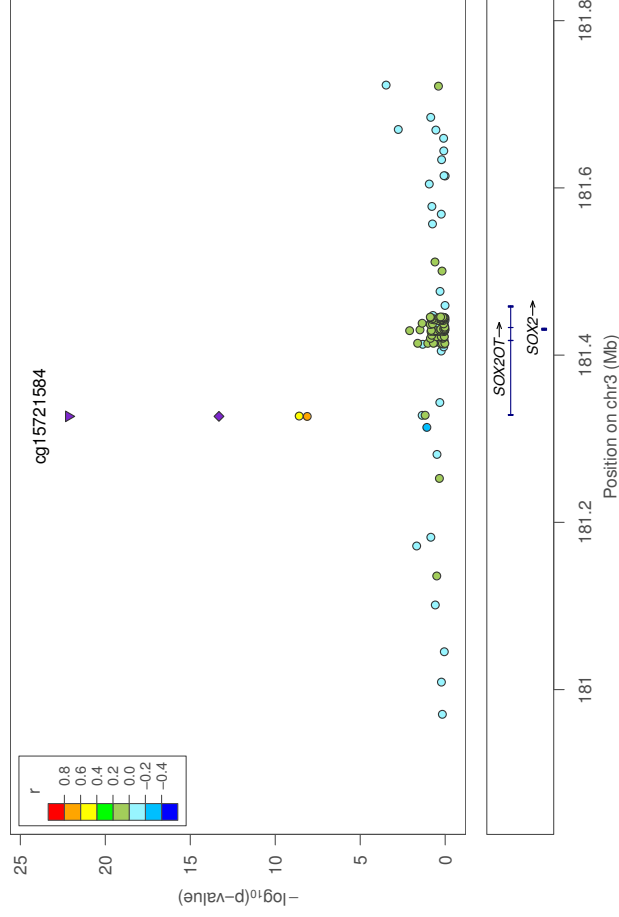

### GOLIM4

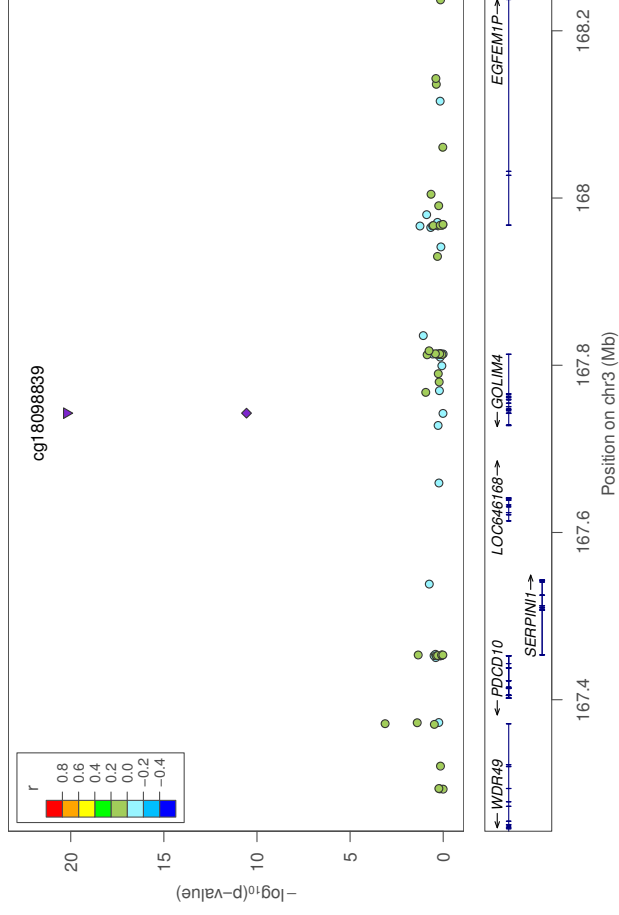

### ABCC5

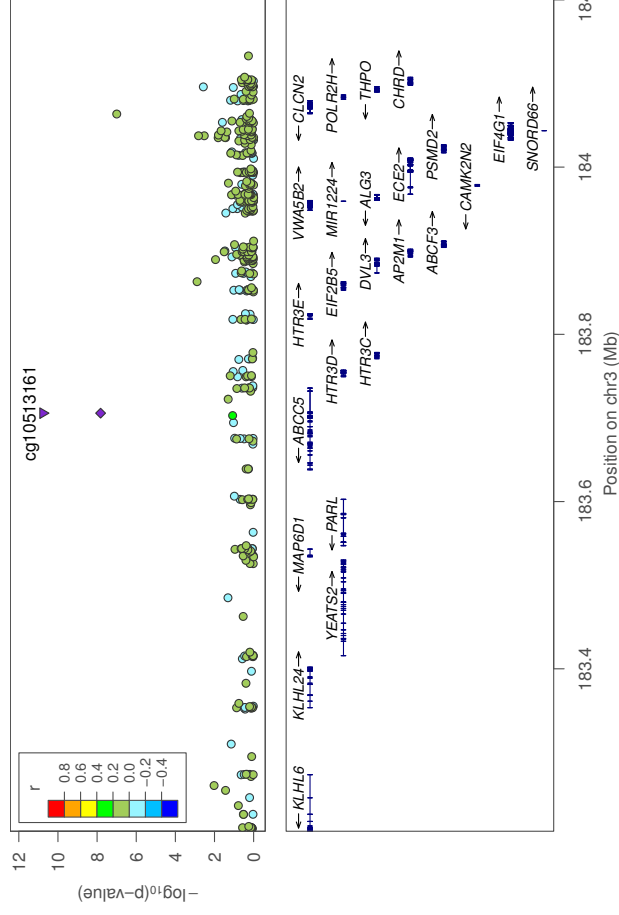

### BCL6

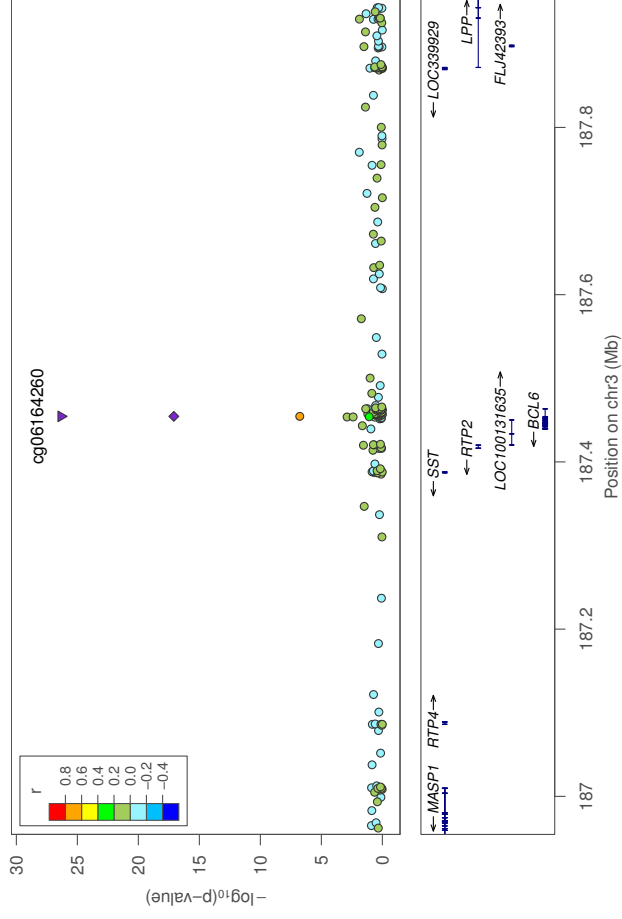

### MUC4

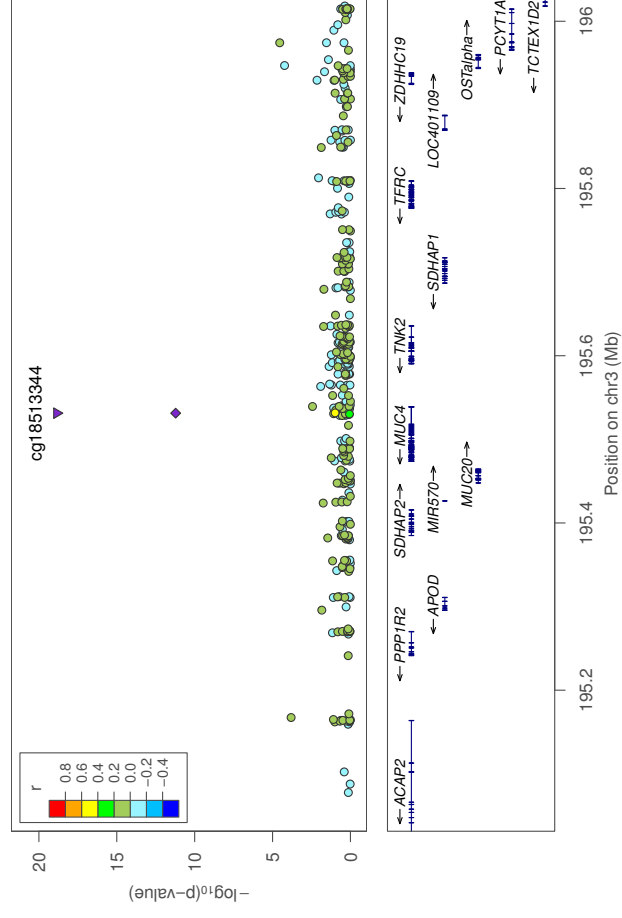

### BCL6

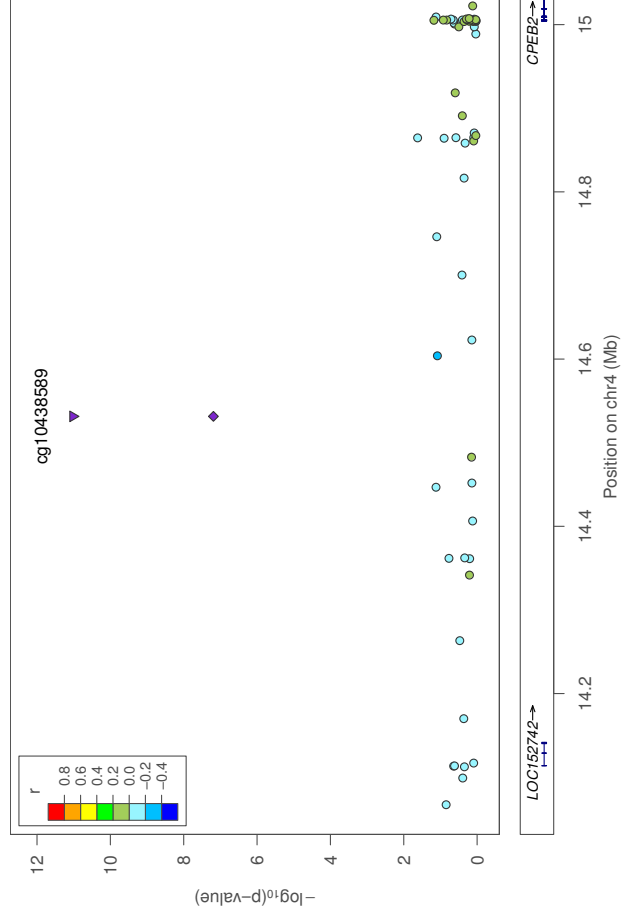

### LINC00504

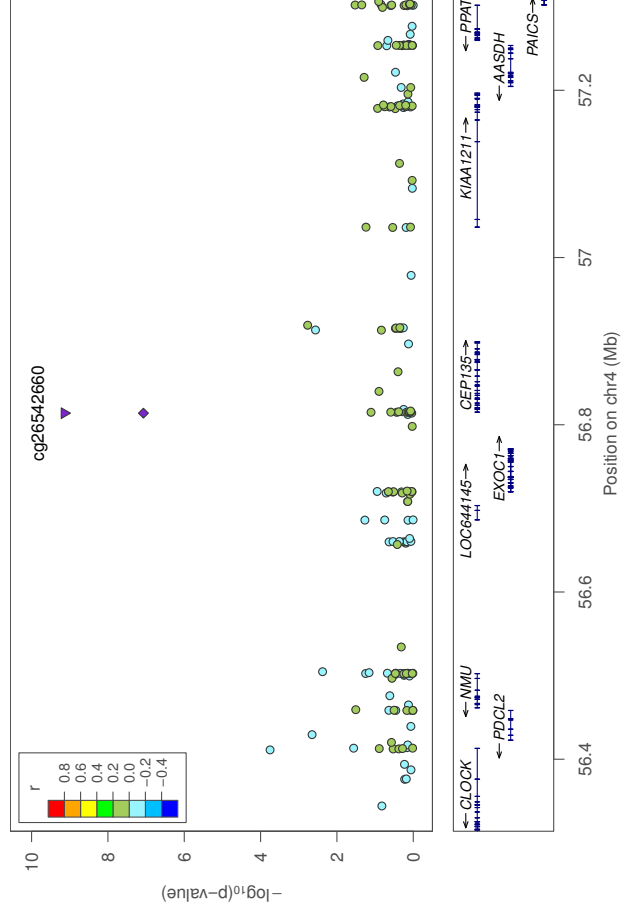

### CEP135

# SLC7A11

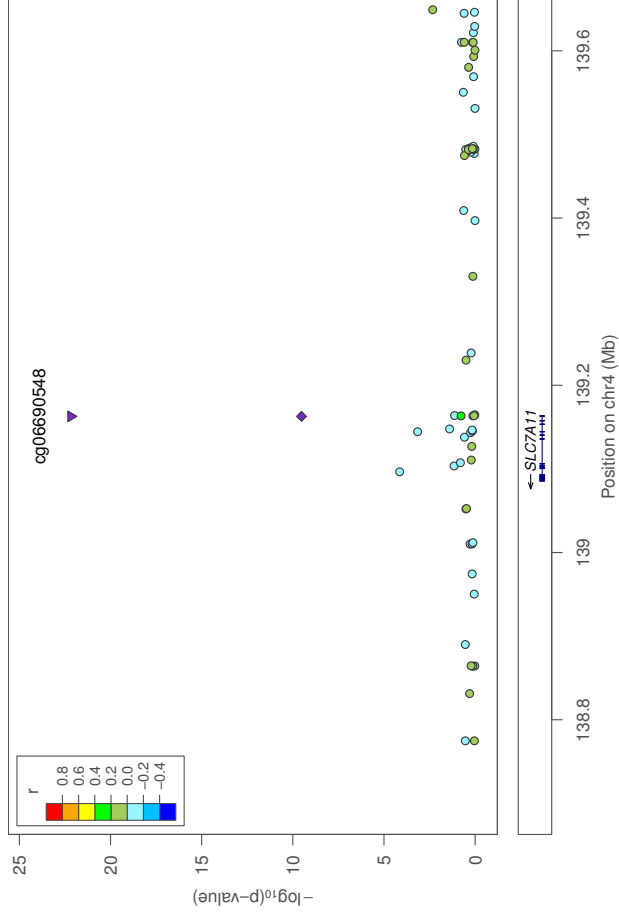

# ROPN1L

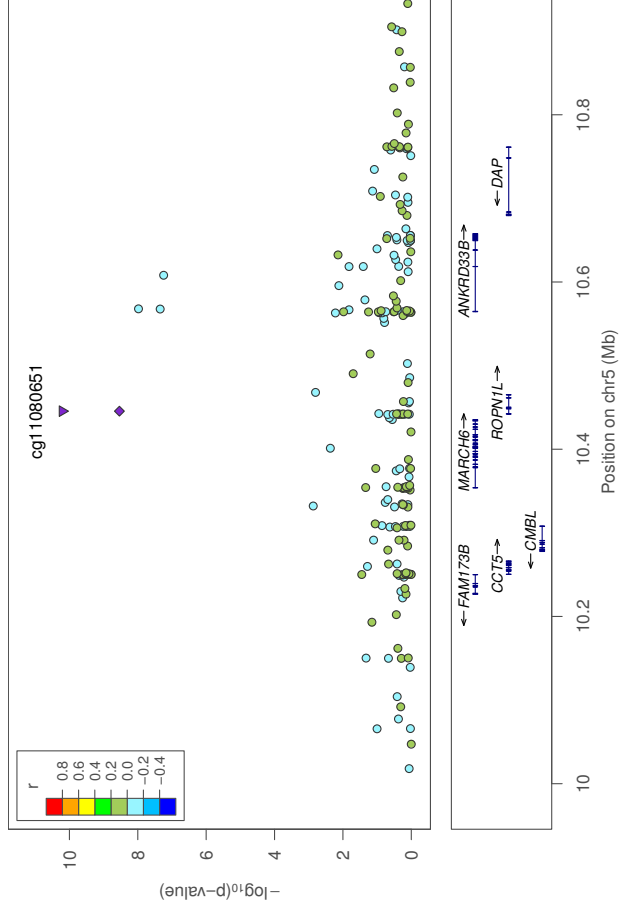

# TRIO

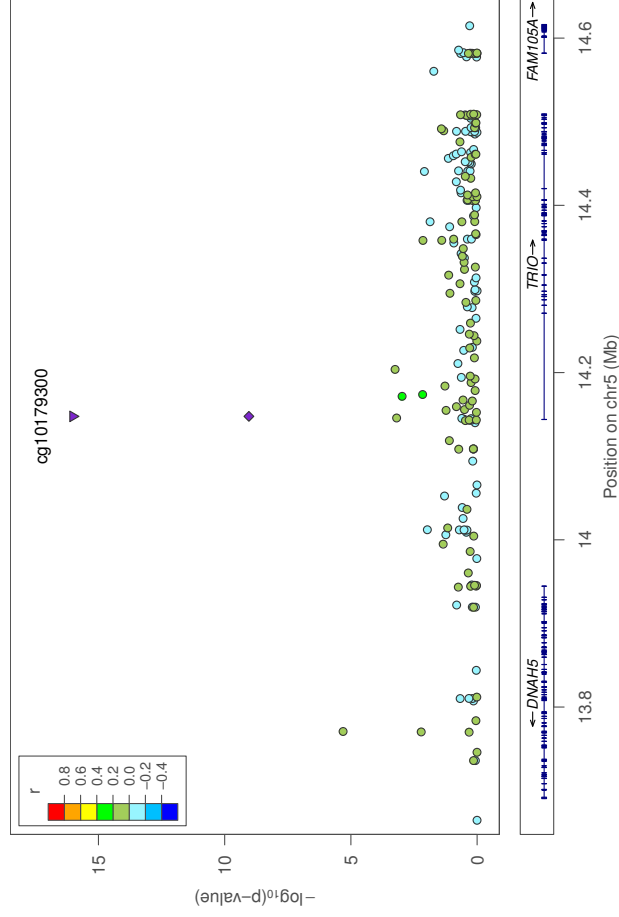

# TMEM173

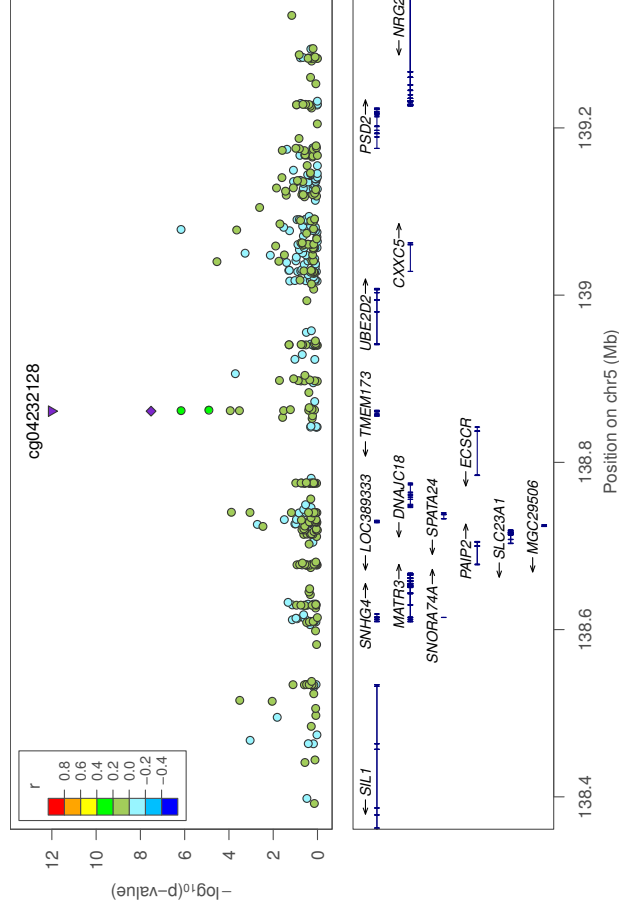



# RNF145

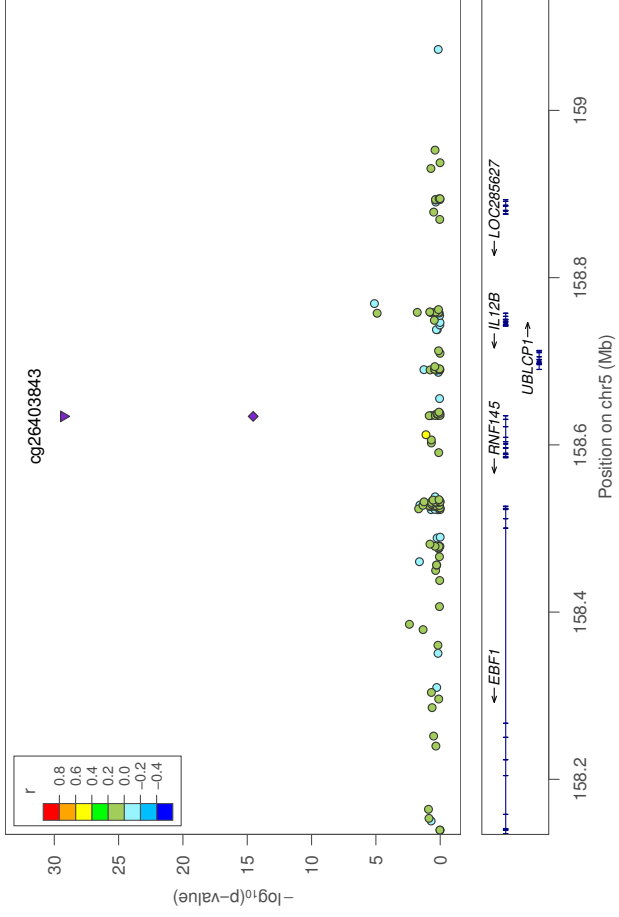

# SLC34A1

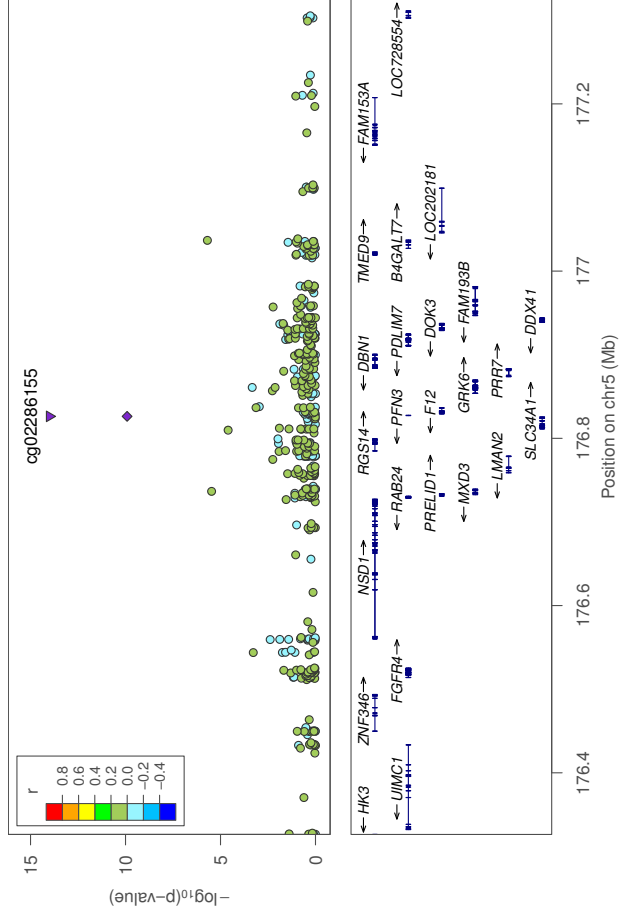

# NPM1

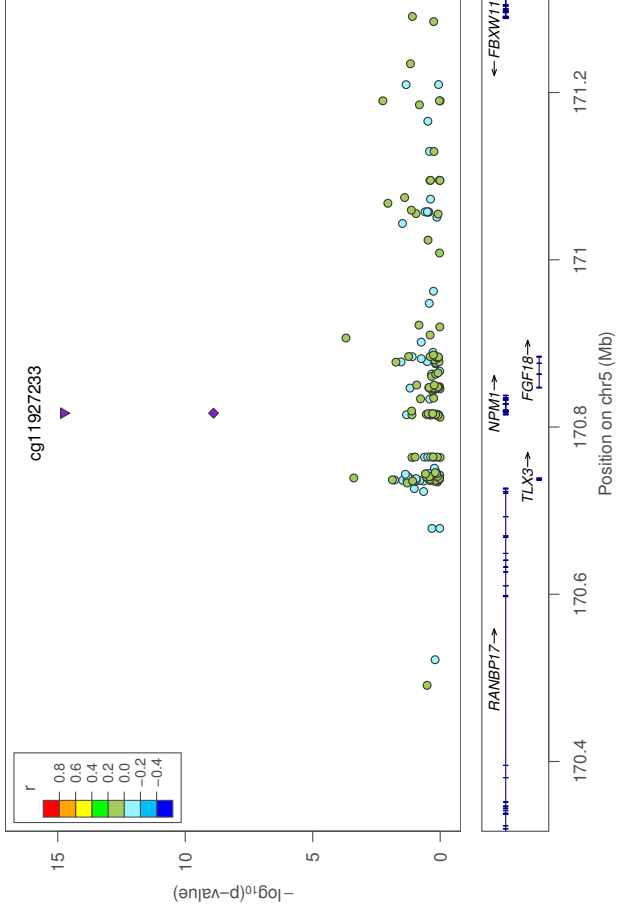

# FLT4

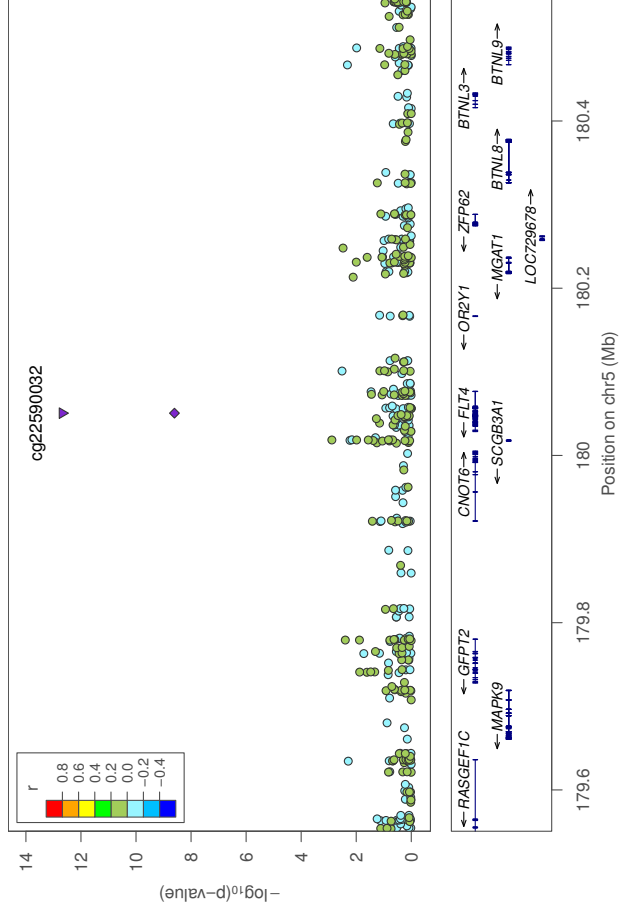

## EXOC2

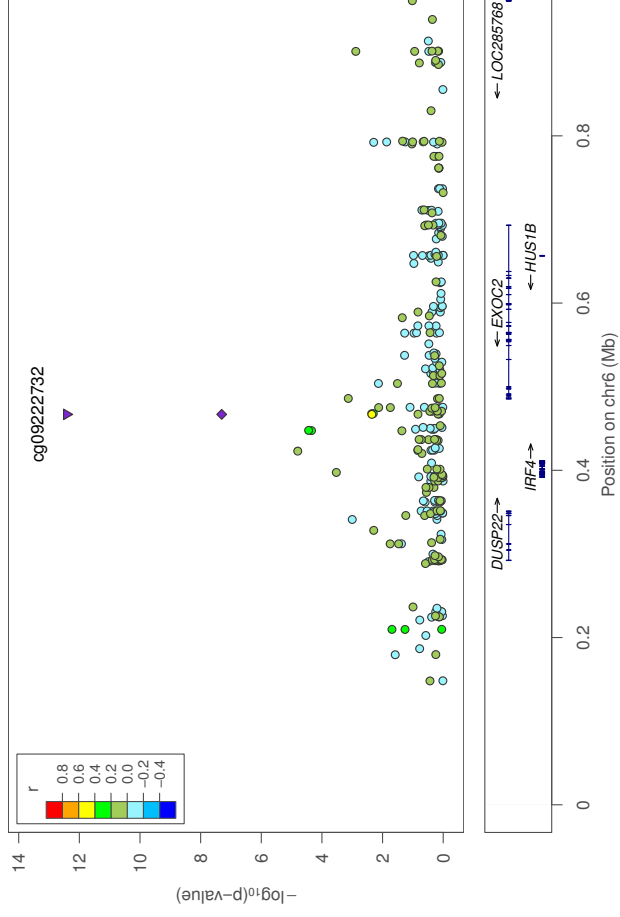

## GABBR1

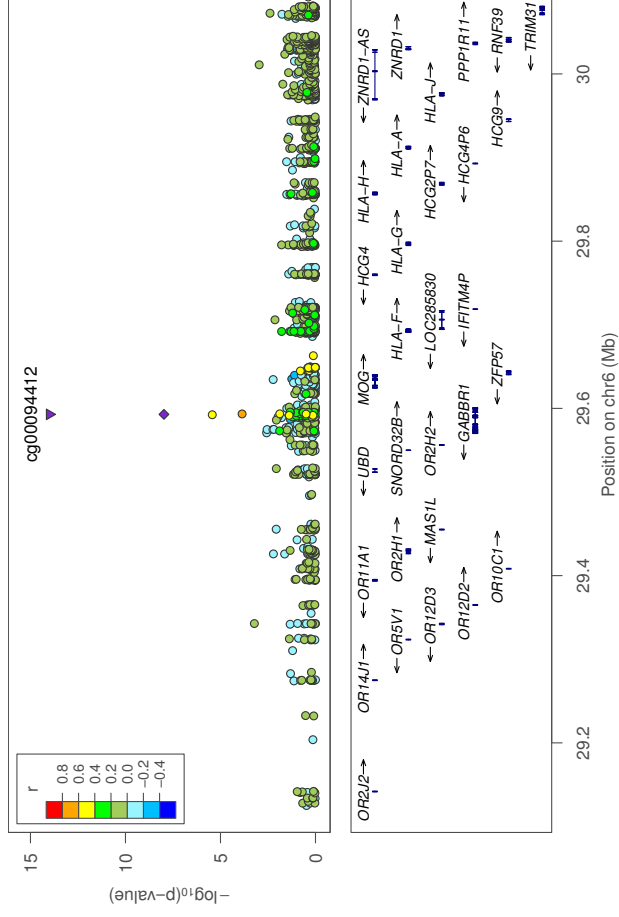

## JARID2

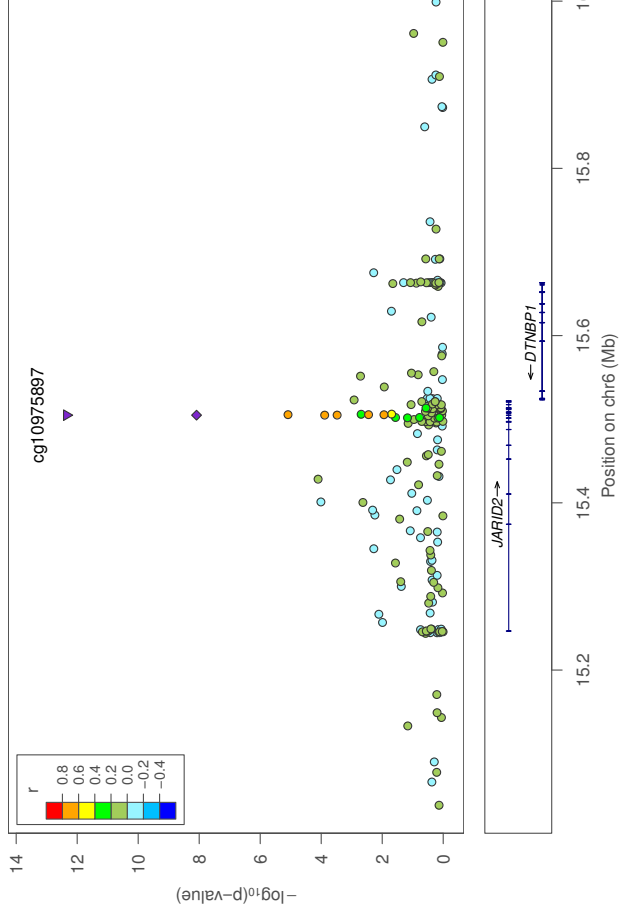

## LY6G6F

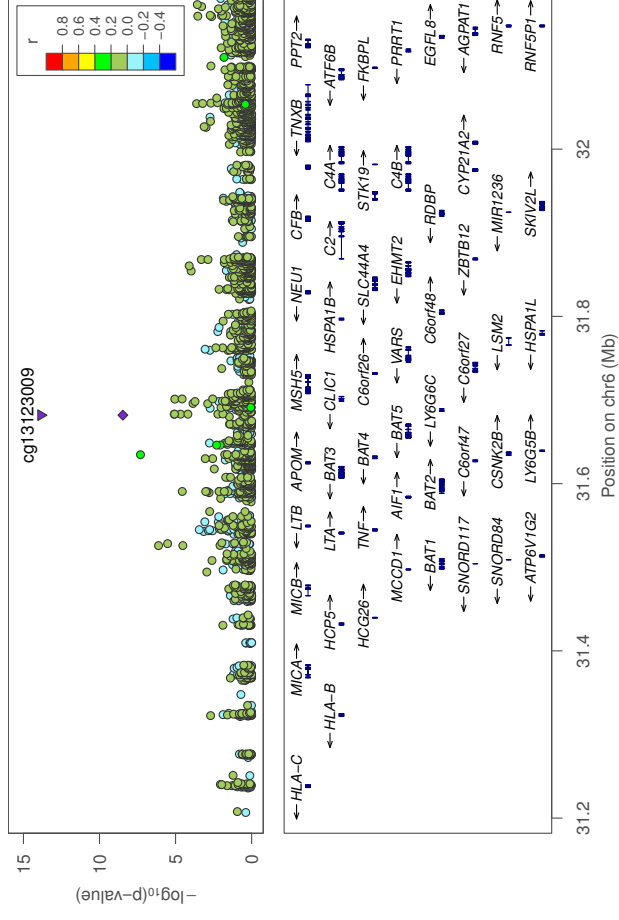

### COX6A1P2

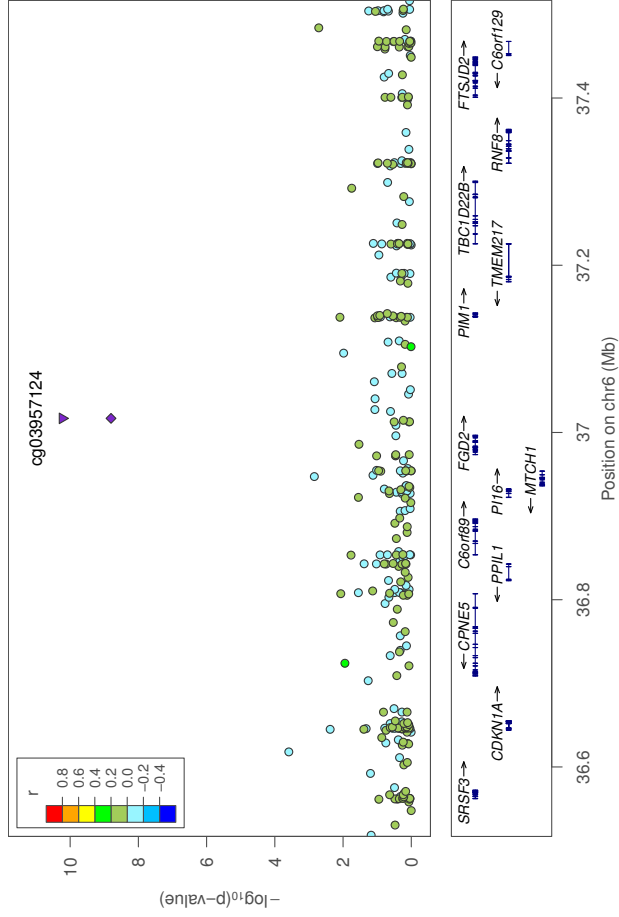

### ARID1B

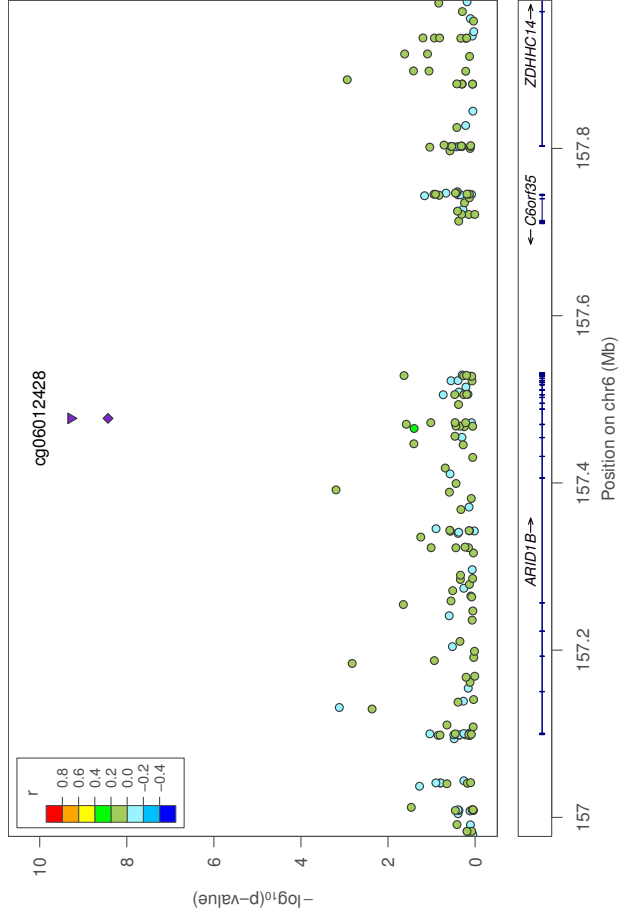

### C6orf223

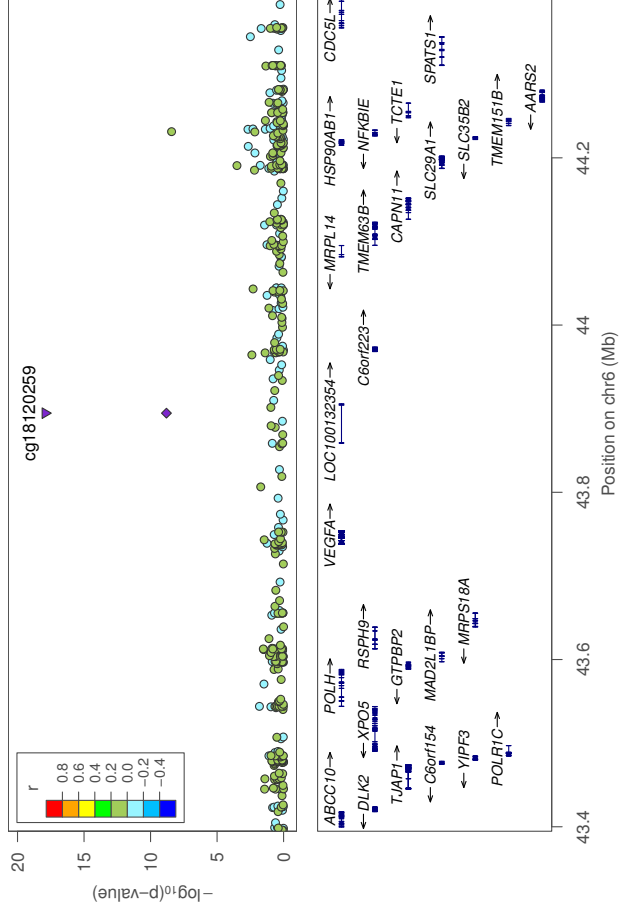

### SYNJ2

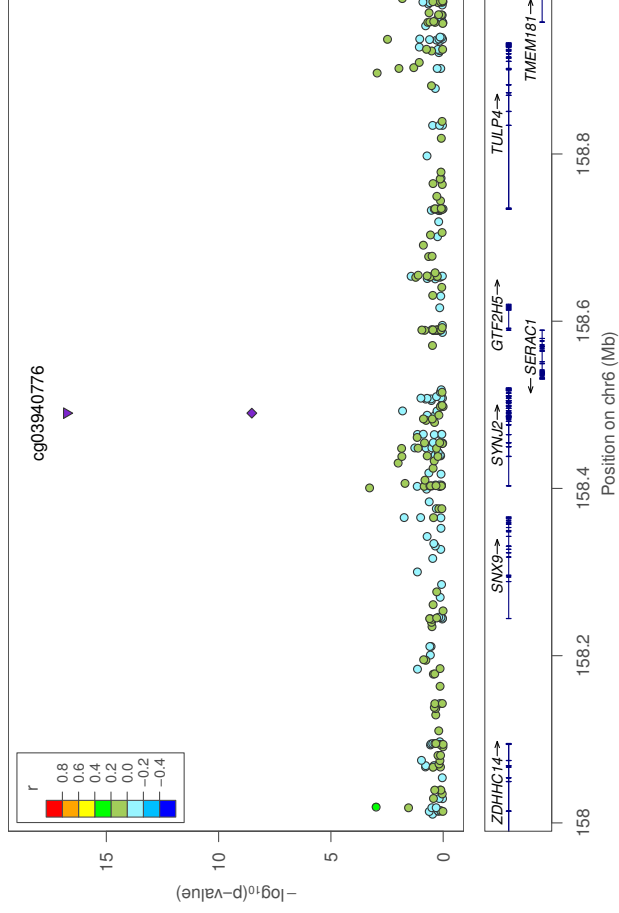

## RPS6KA2

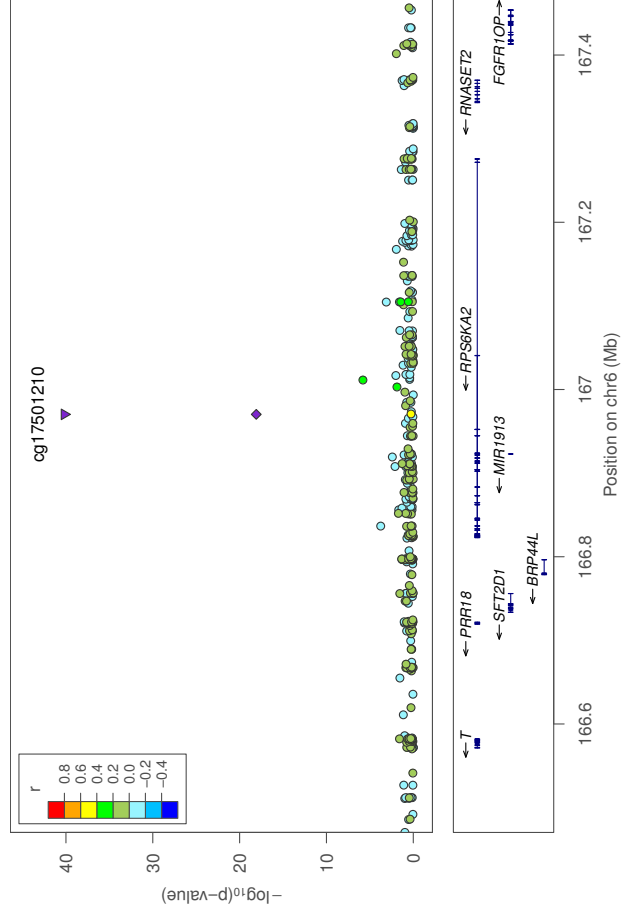

## MAD1L1

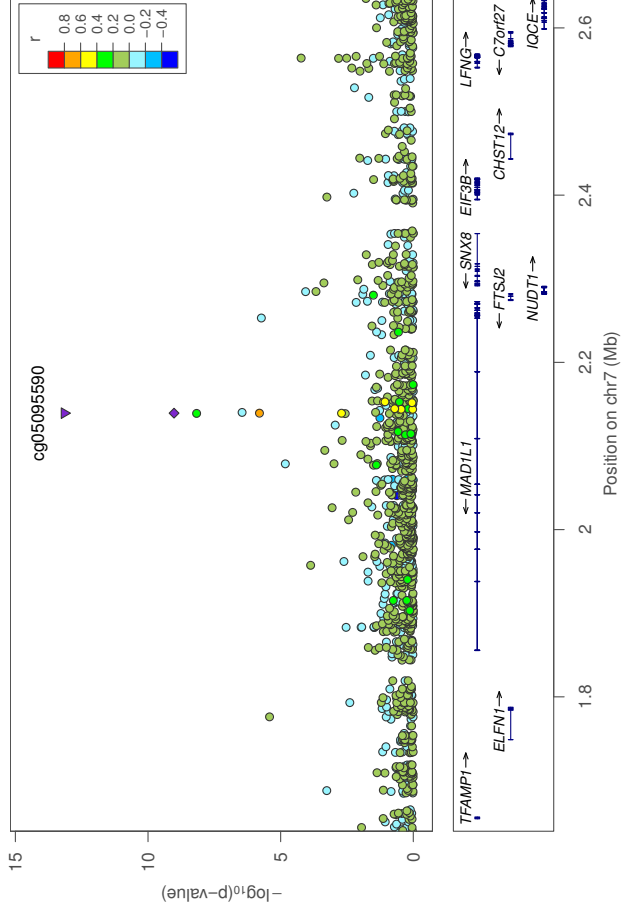

## ICA1

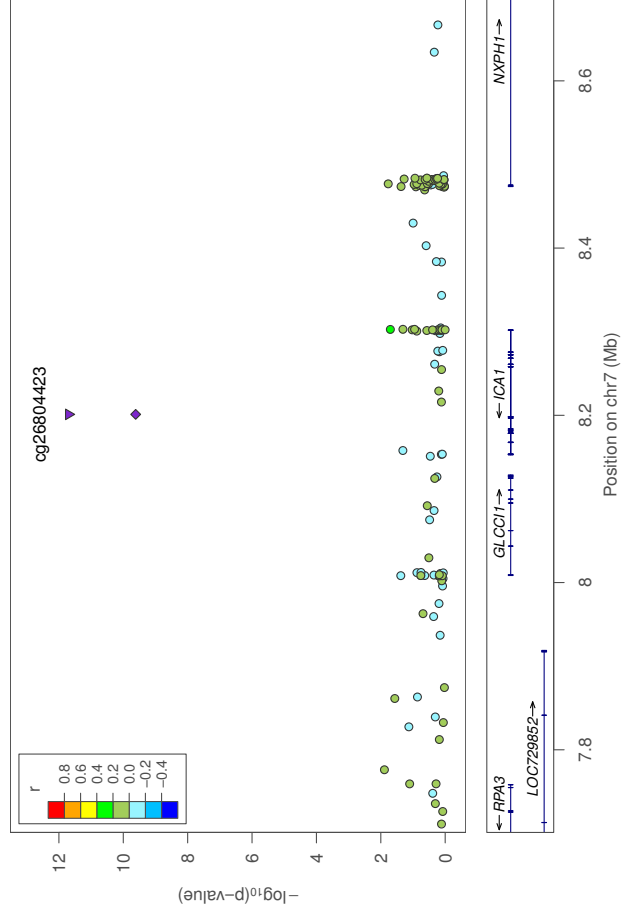

## HOXA-AS2

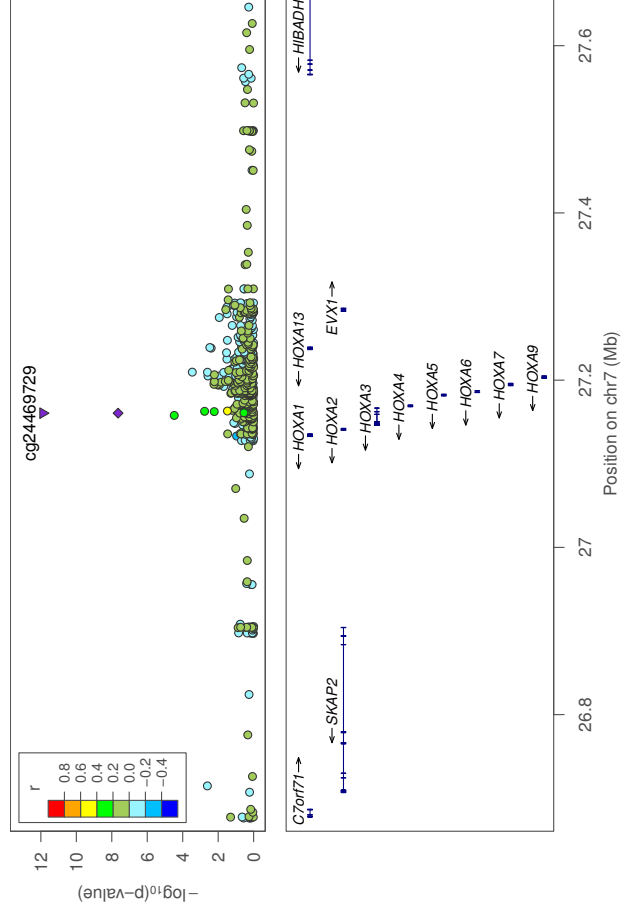

## GARS

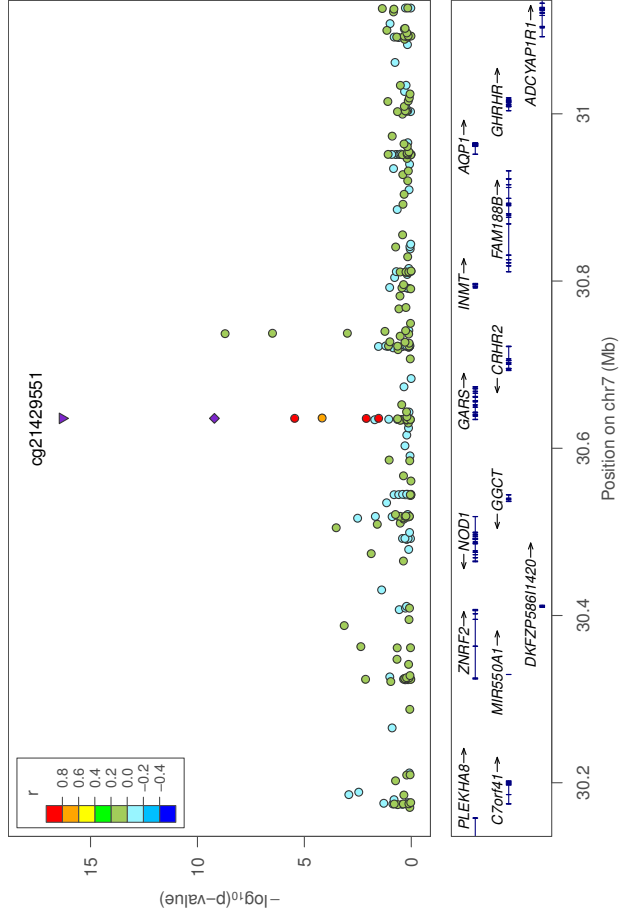

## RFC2

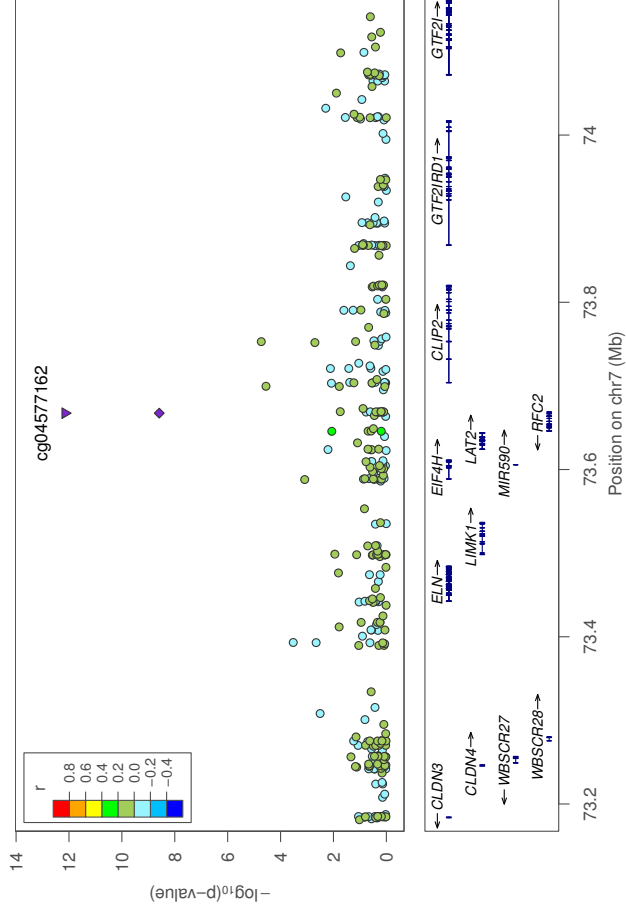

## TRIP6

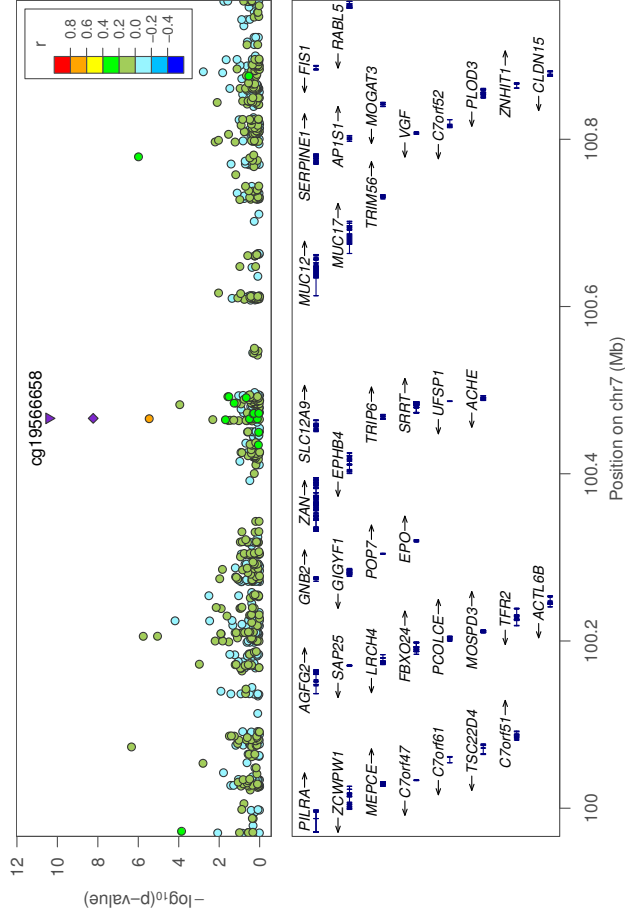

## SH2B2

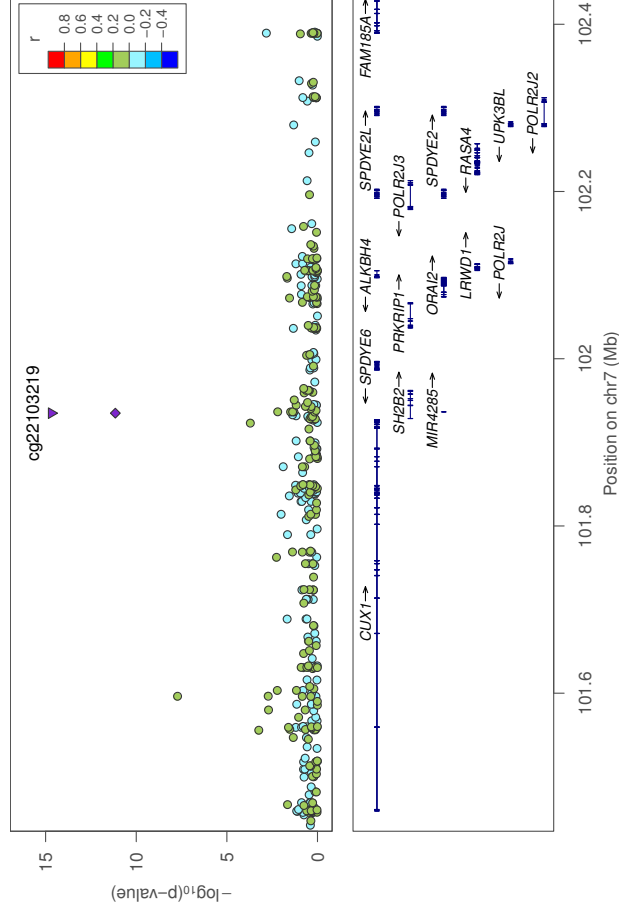

### ST7

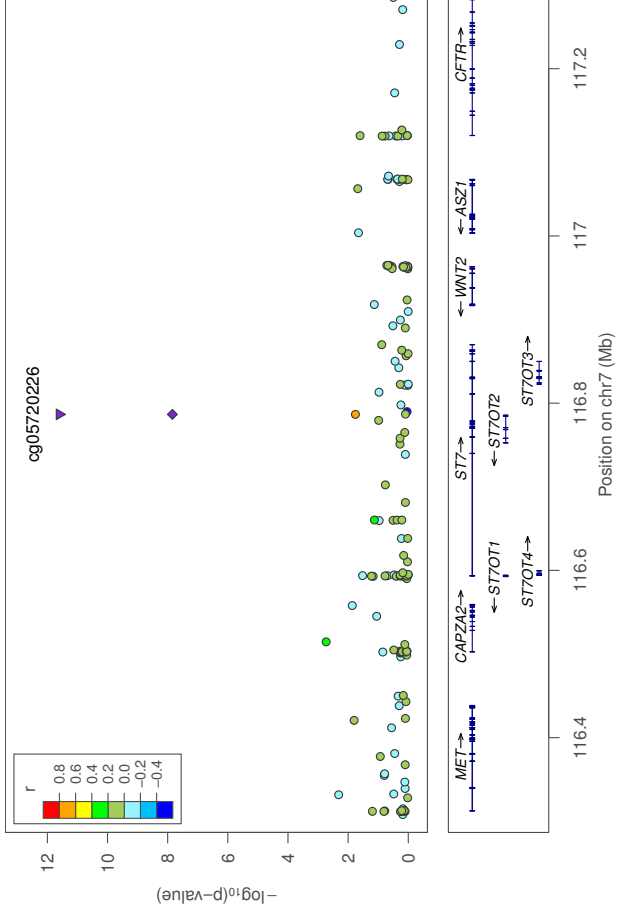

### SND1

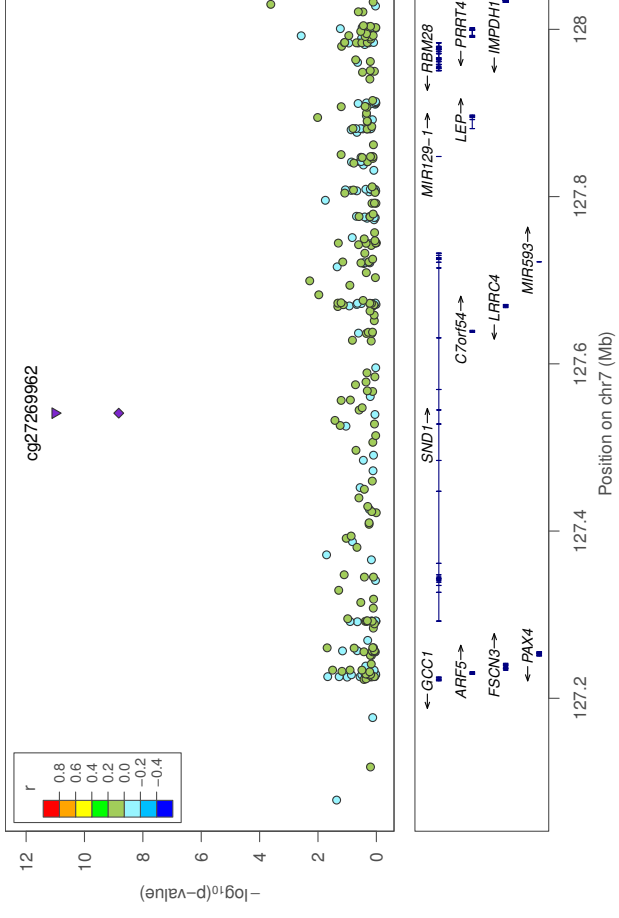

### RN7SL142P

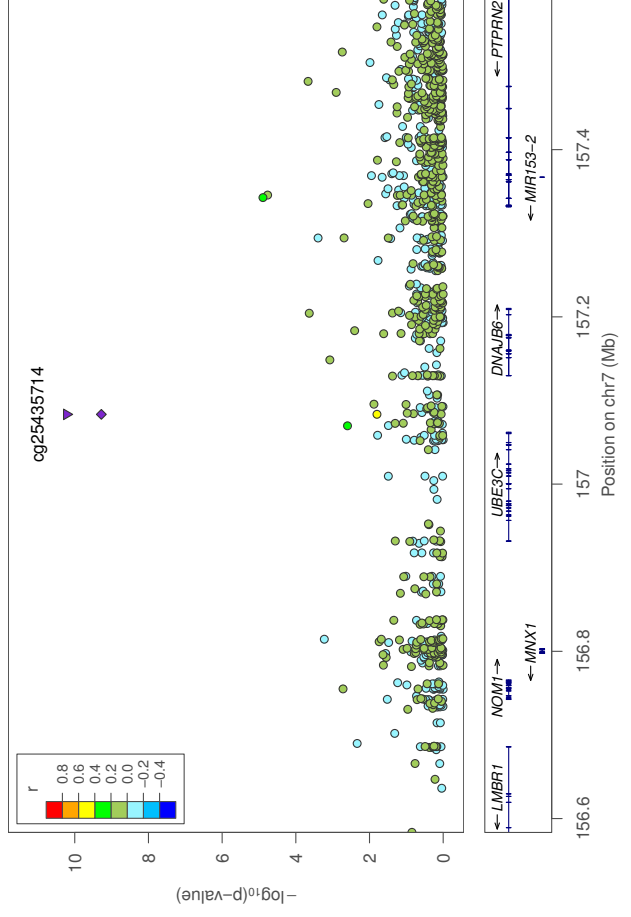

### LOXL2

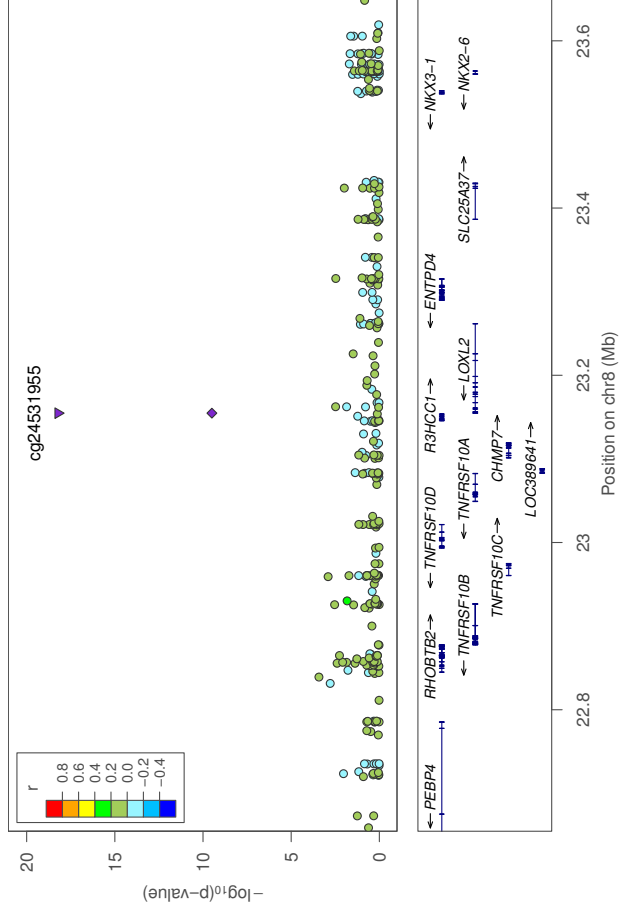

# RPL5P24

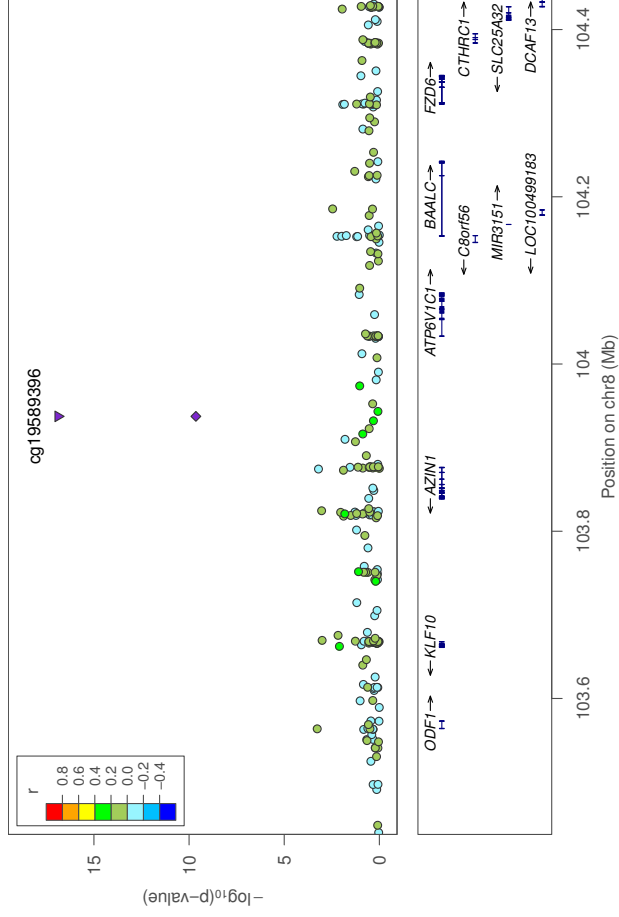

# LINC00964

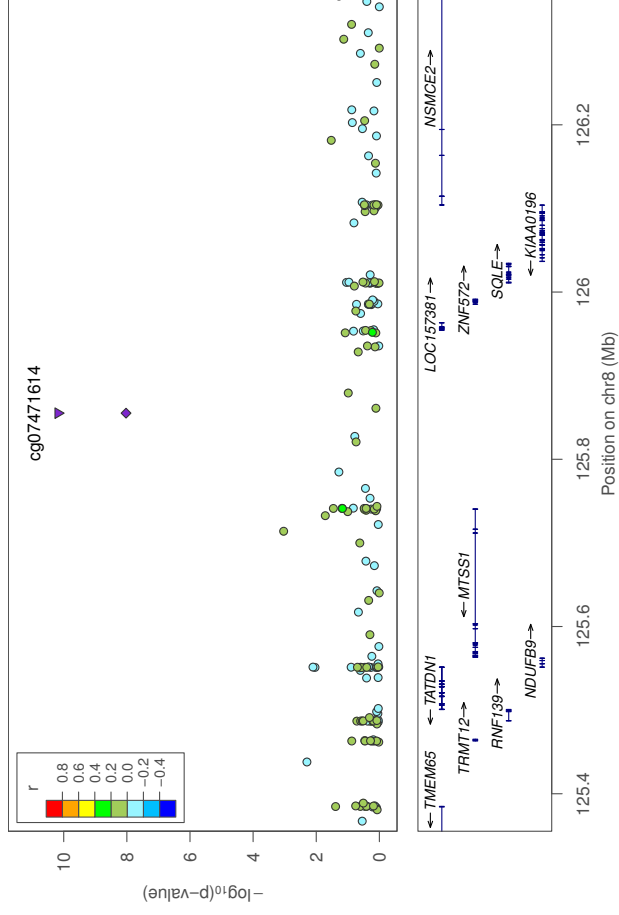

# SLC45A4

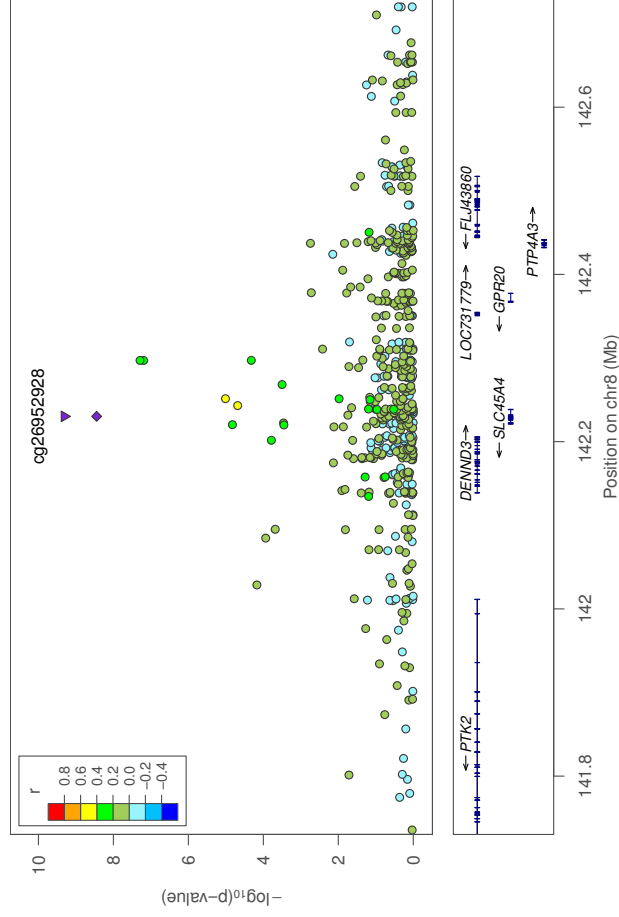

# ZC3H3

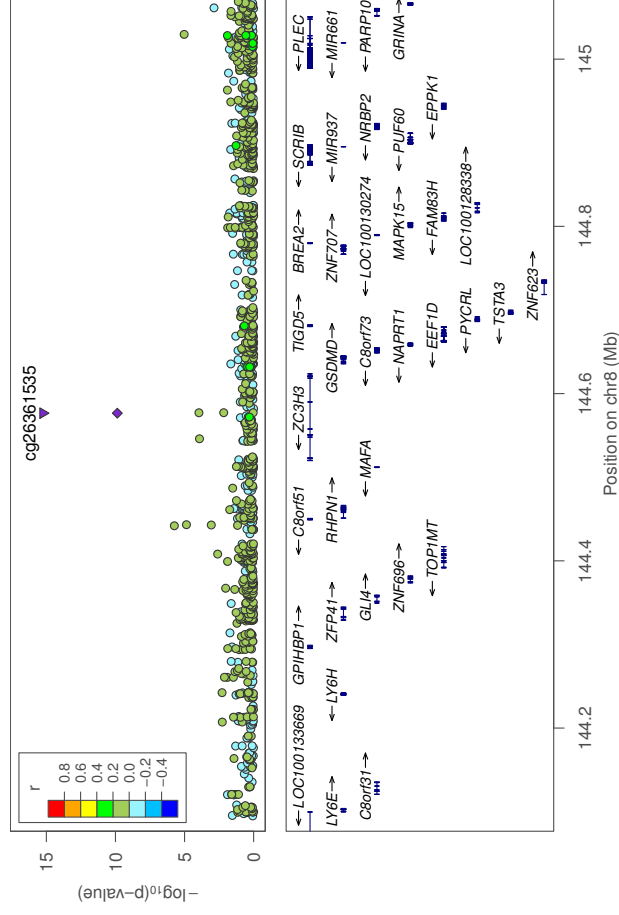

### AQP3

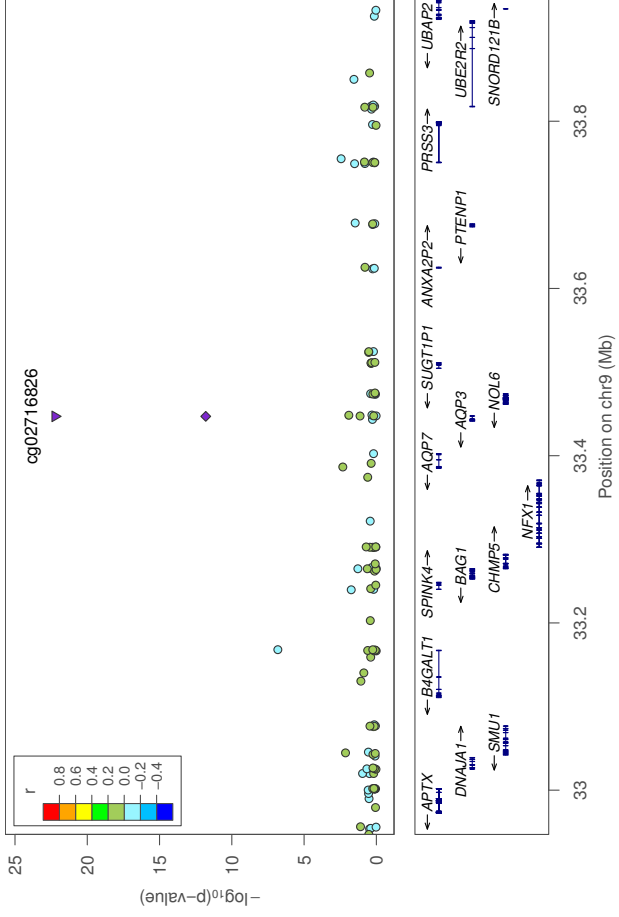

### ANXA1

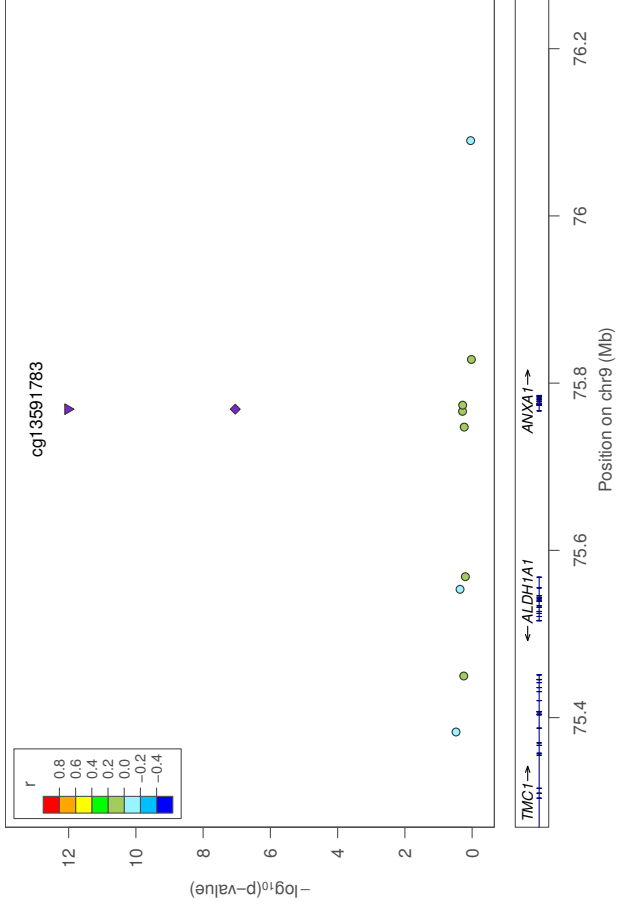

### PRRC2B

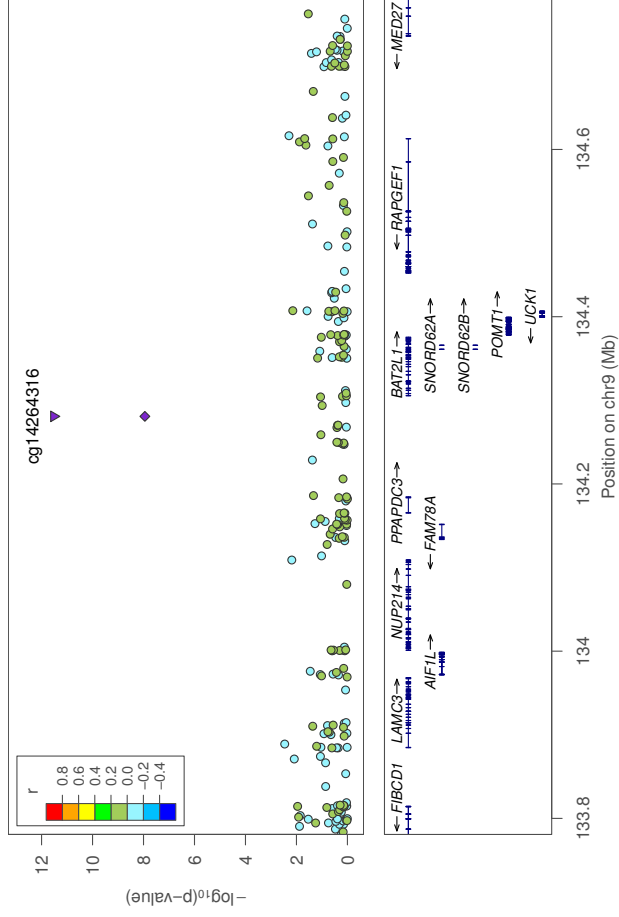

### NACC2

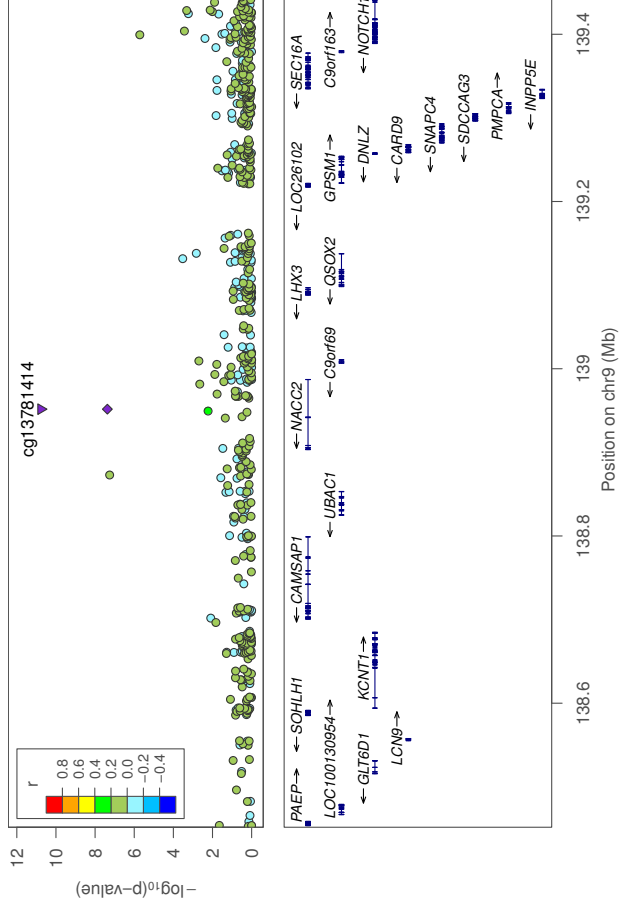



## BEND7

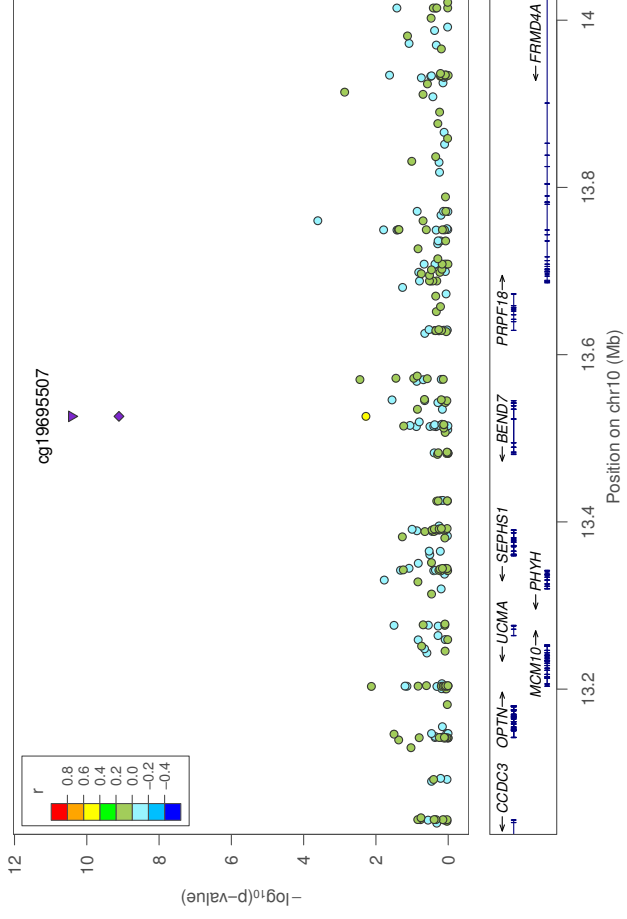

## ANAPC16

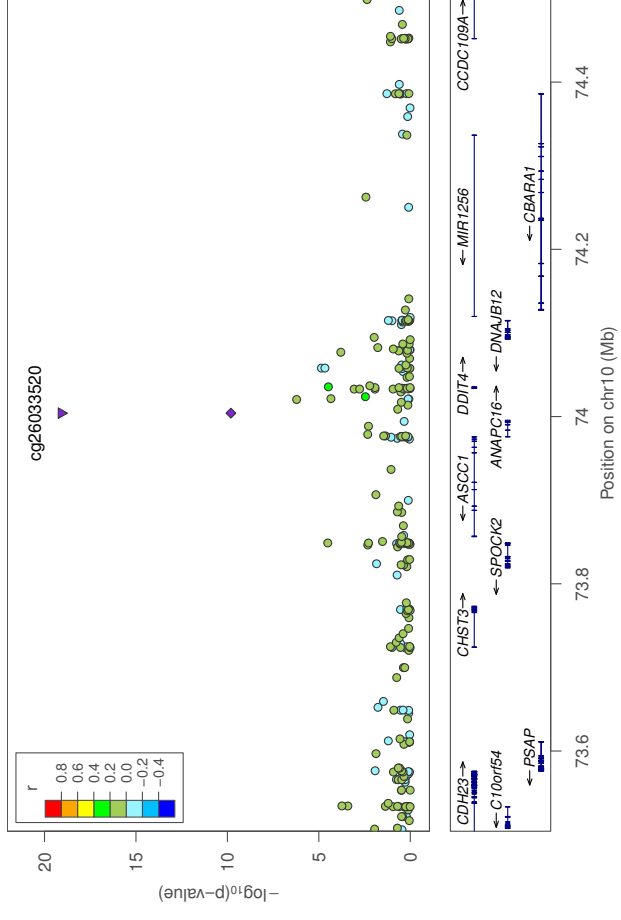

## C10orf99

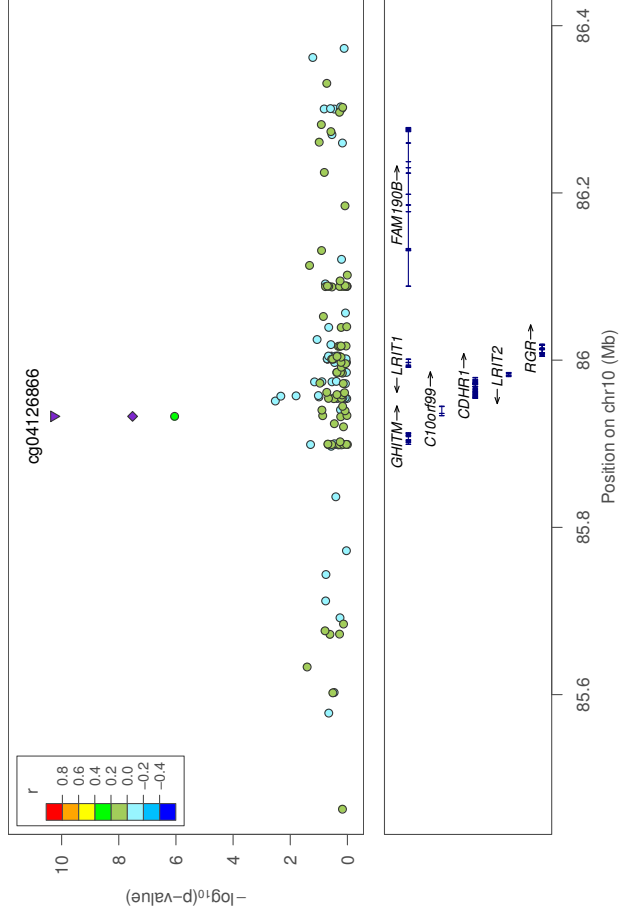

## PCGF5

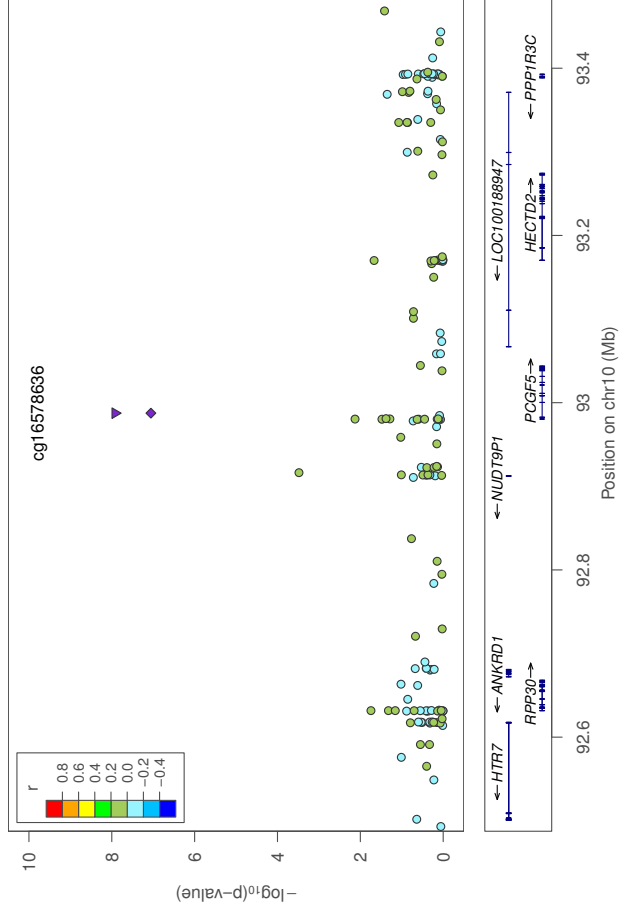

### LINC00263

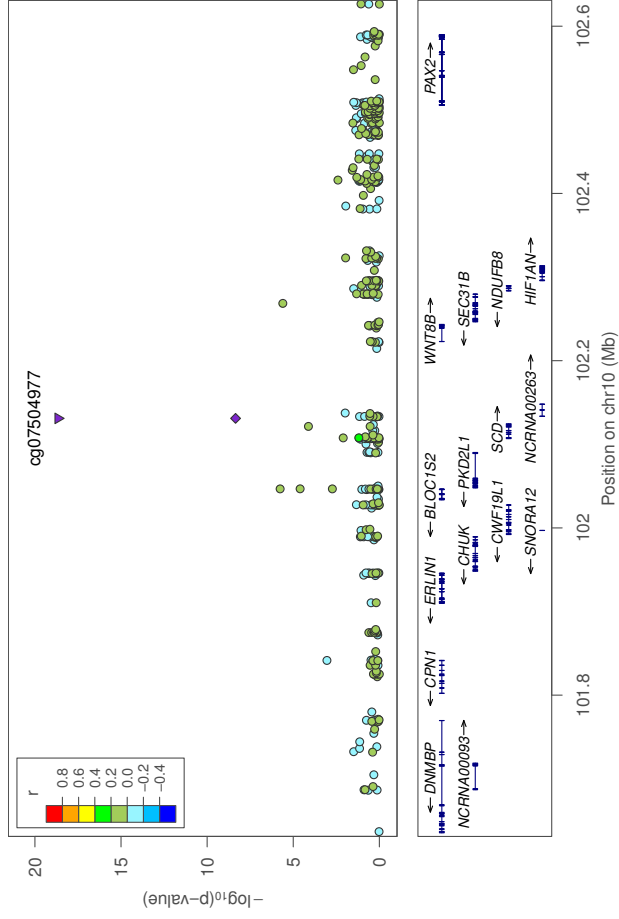

### SMC3

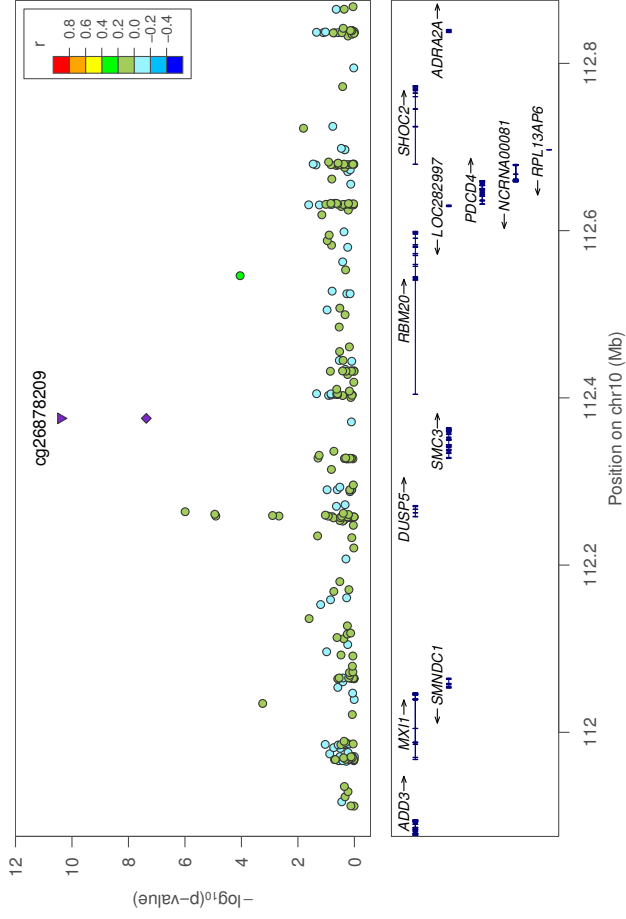

### ELOVL3

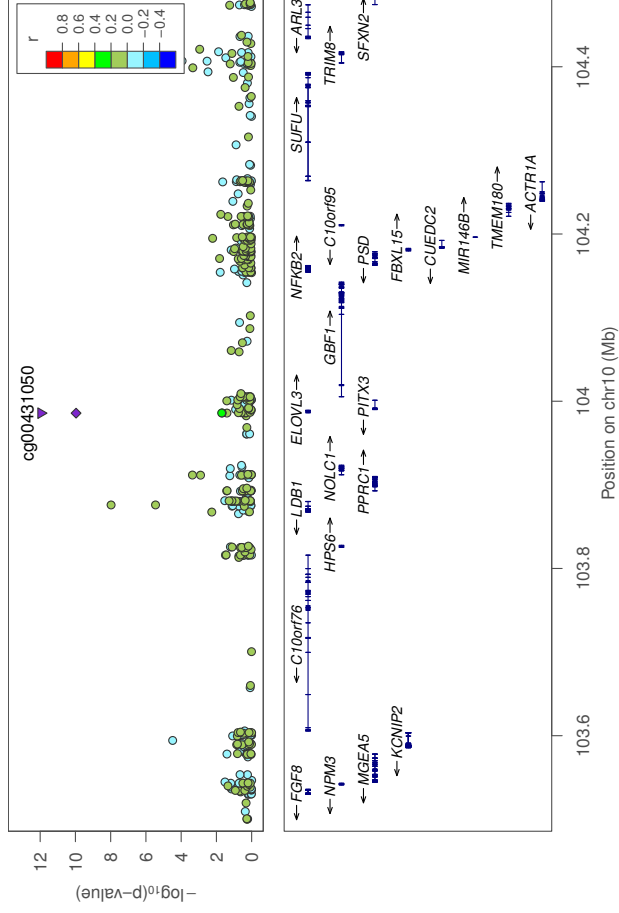

### FAM53B

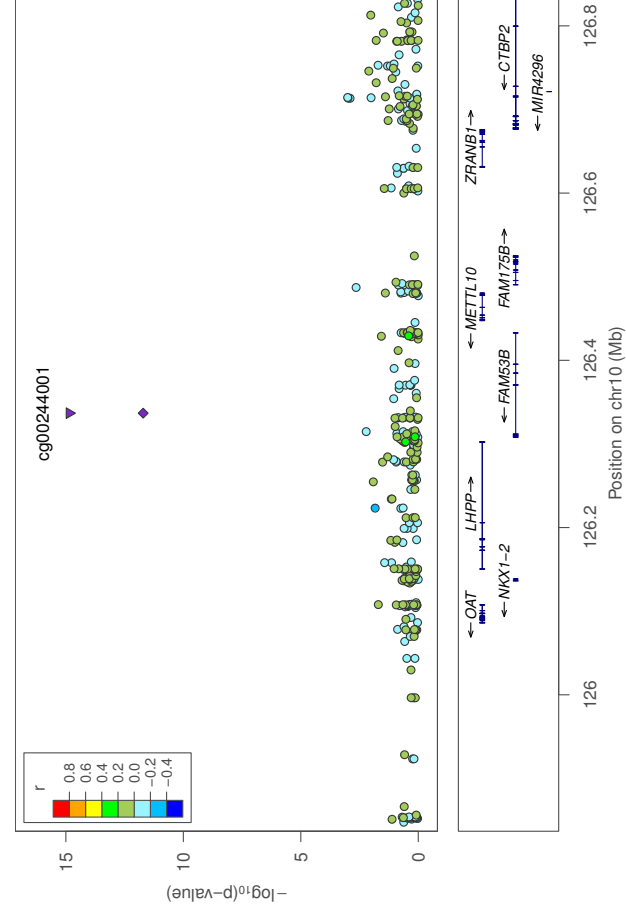

## PTPRE

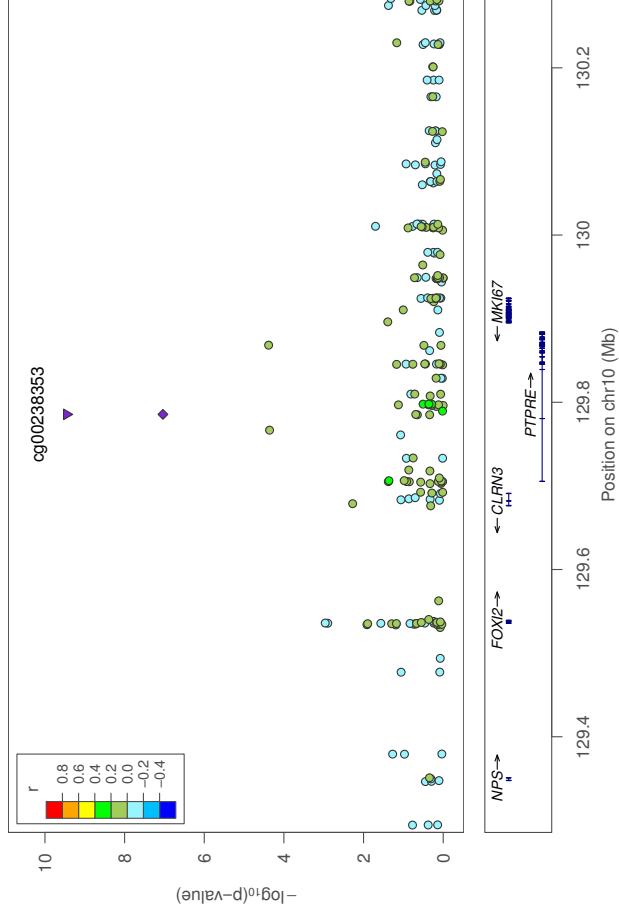

## KCNQ1

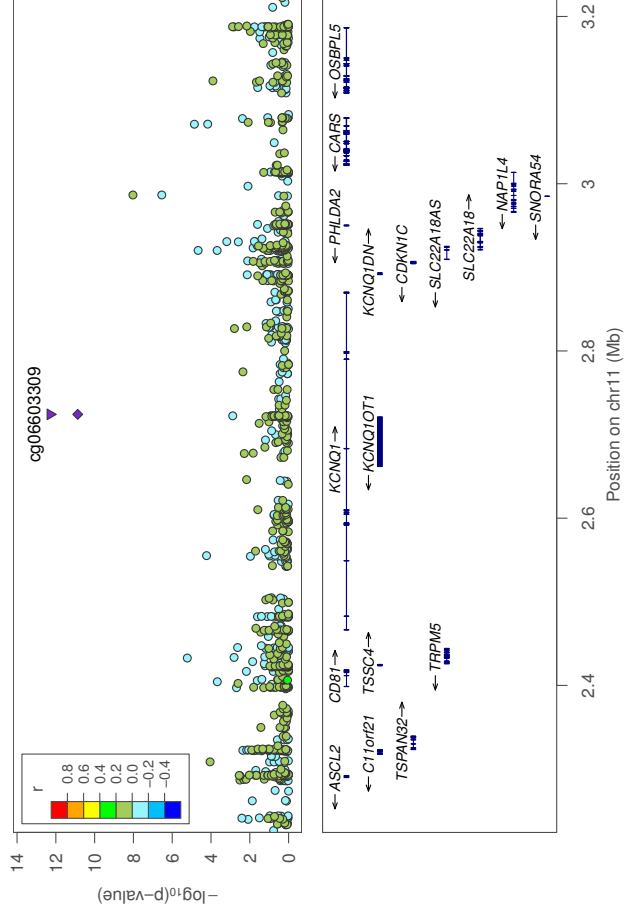

## CTSD

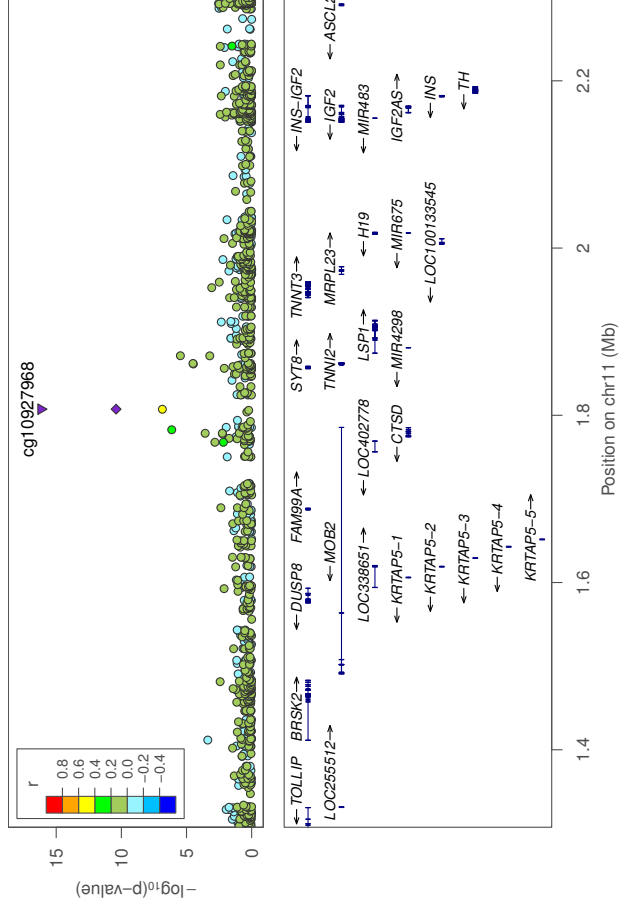

## PRR5L

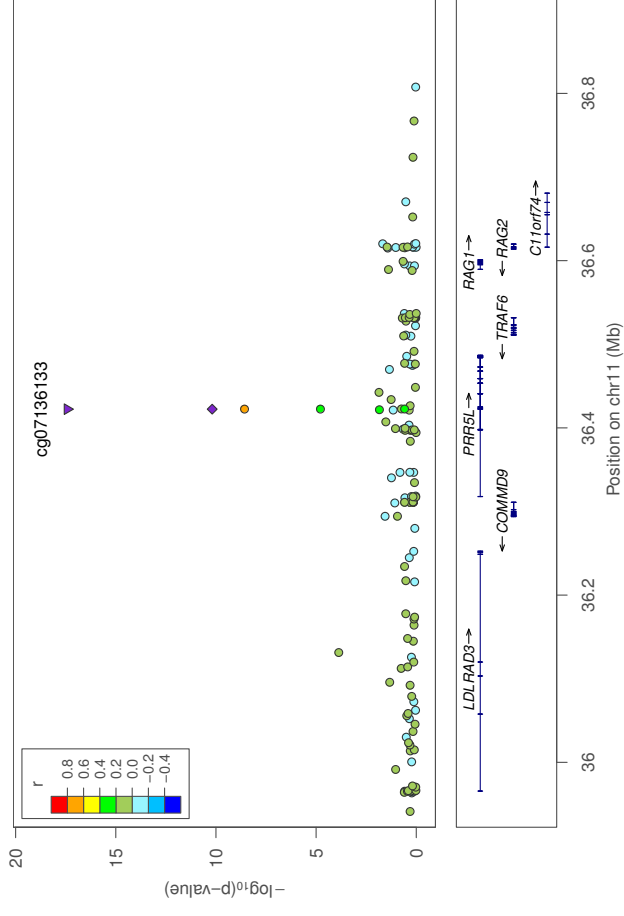

## CD82

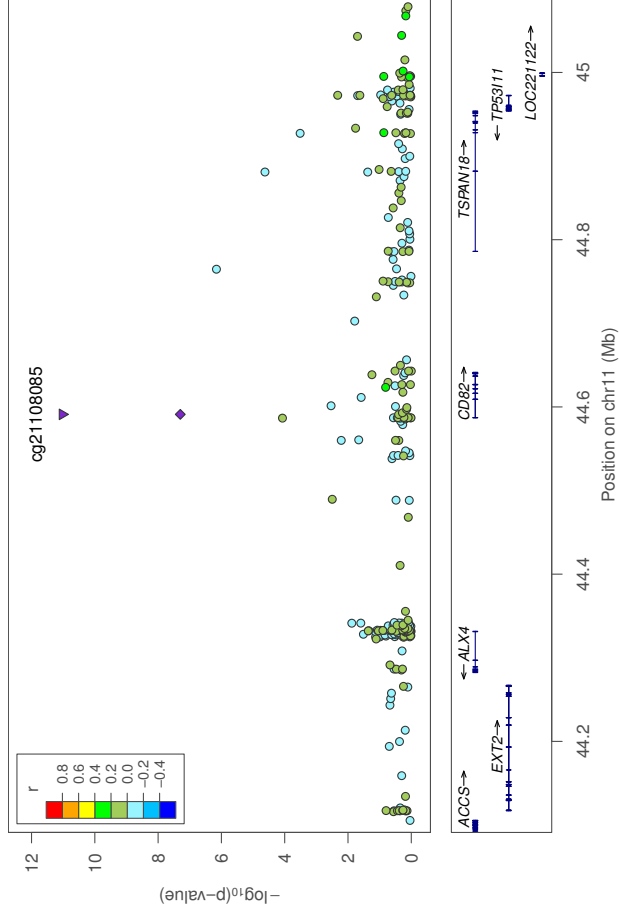

## PRDM11

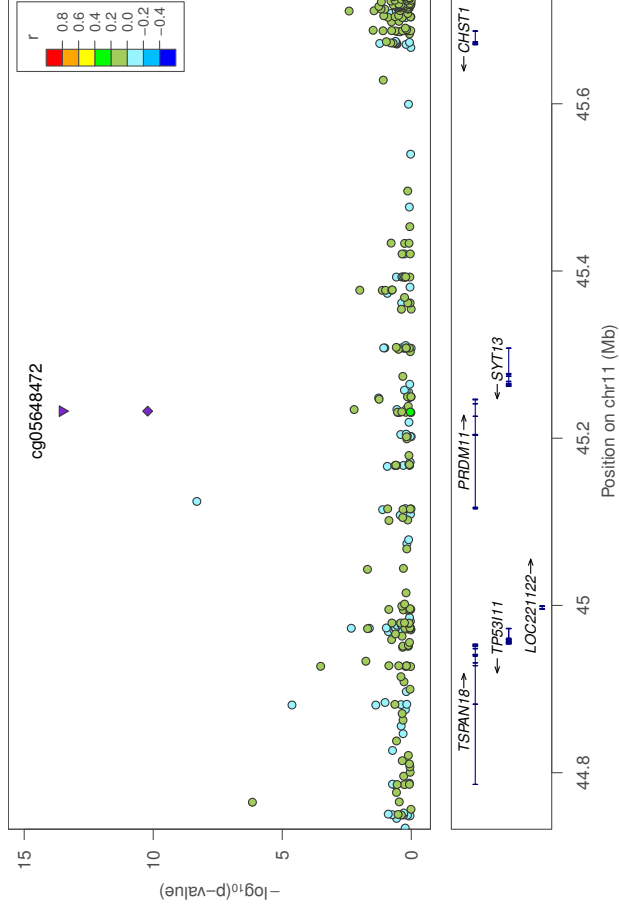

## SLC43A1

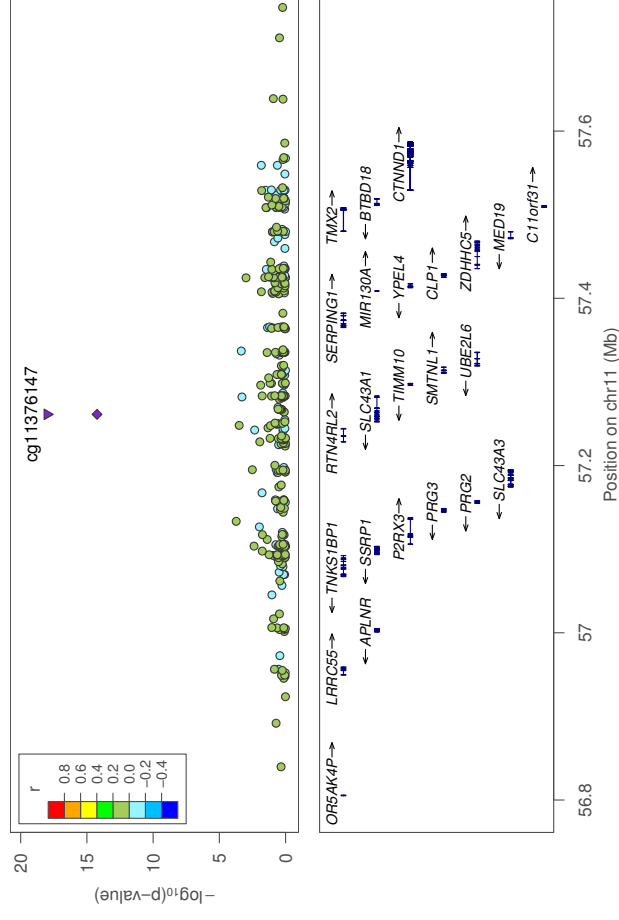

## BSCL2

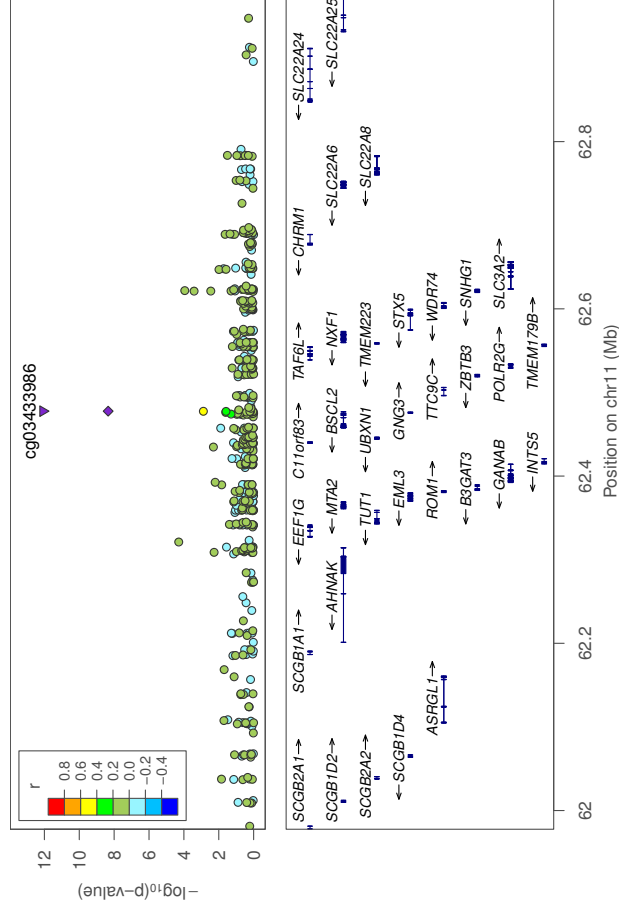

### CPT1A

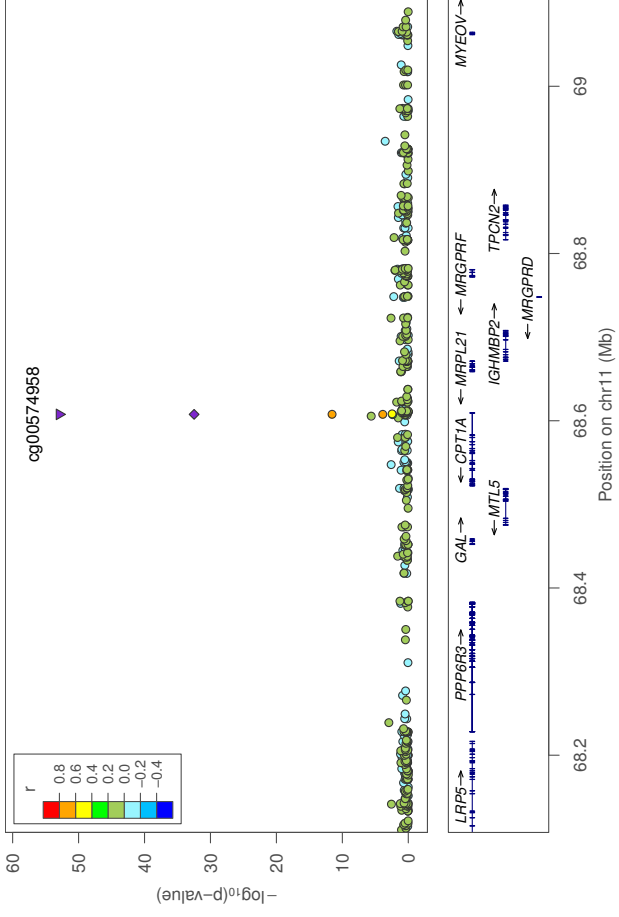

### BCO2

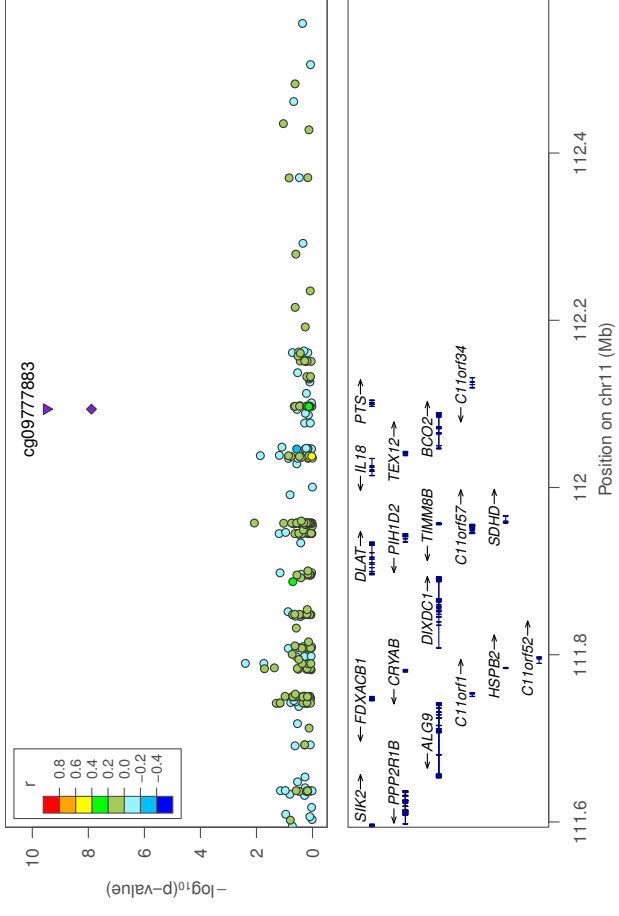

### BCL9L

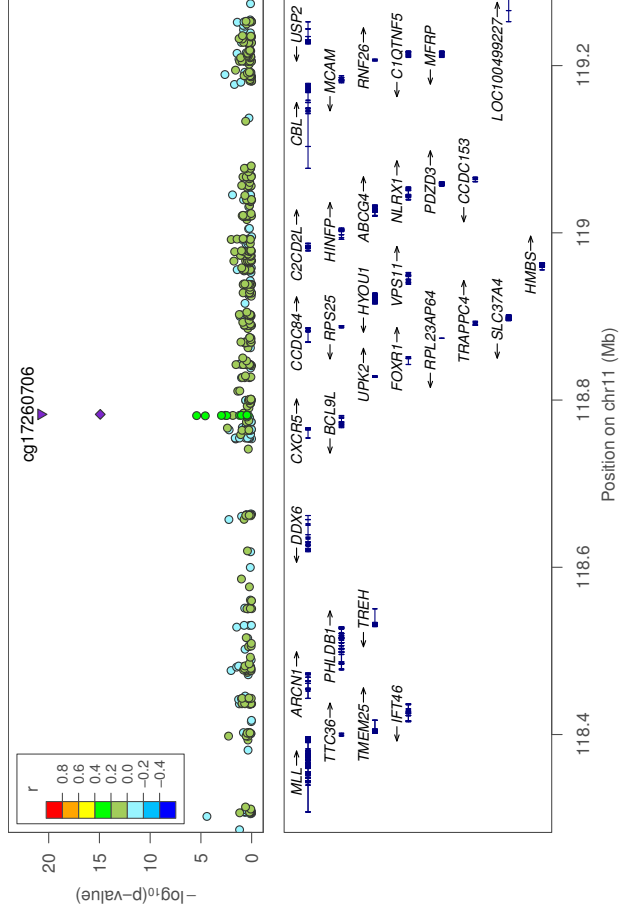

### CLMP

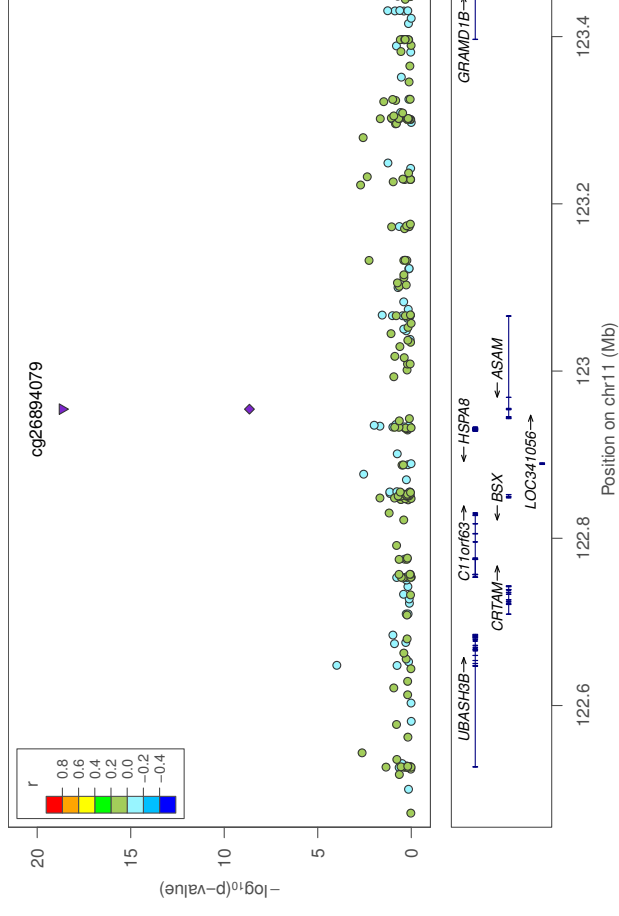

# PLBD1

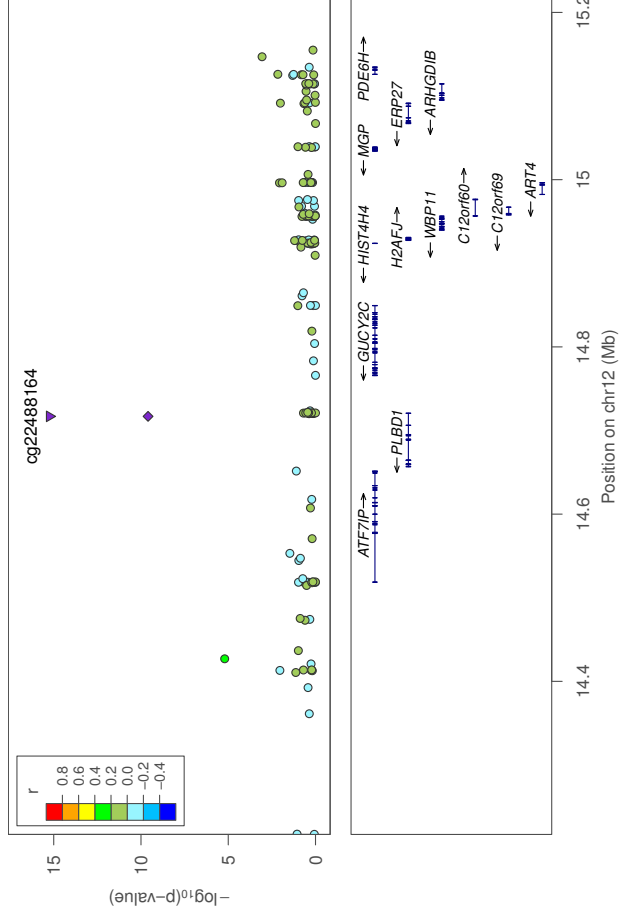

# IGFBP6

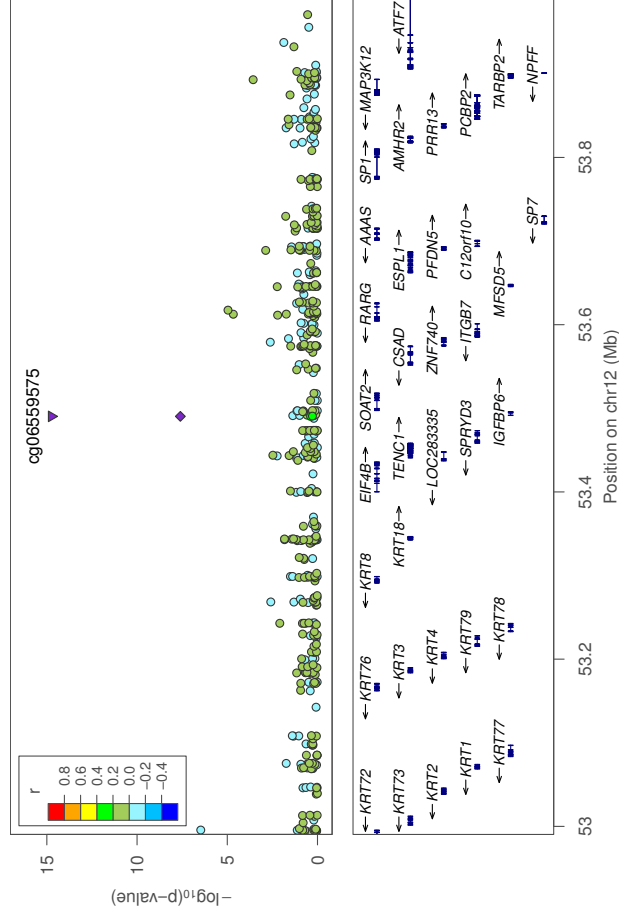

# CNTN1

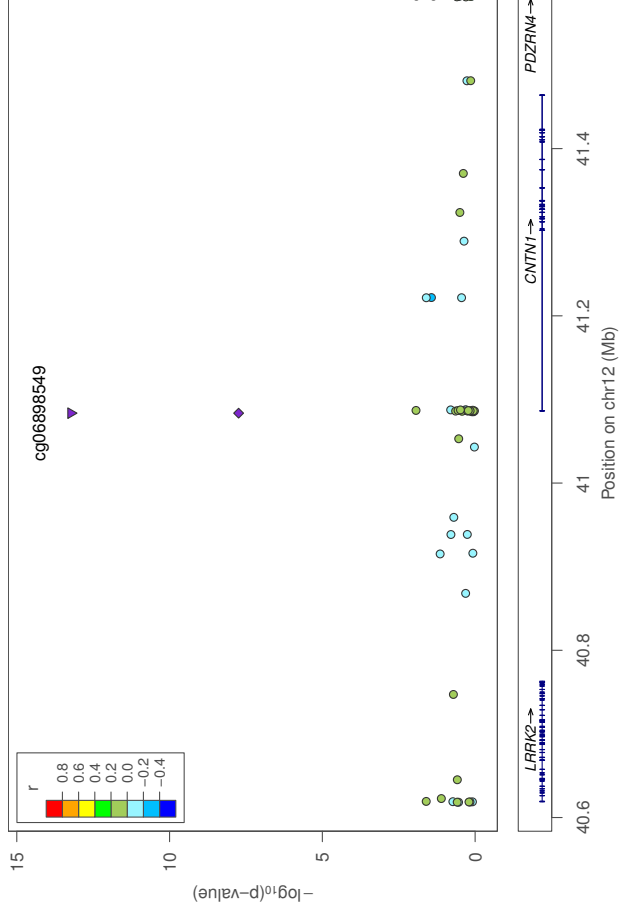

# DCN

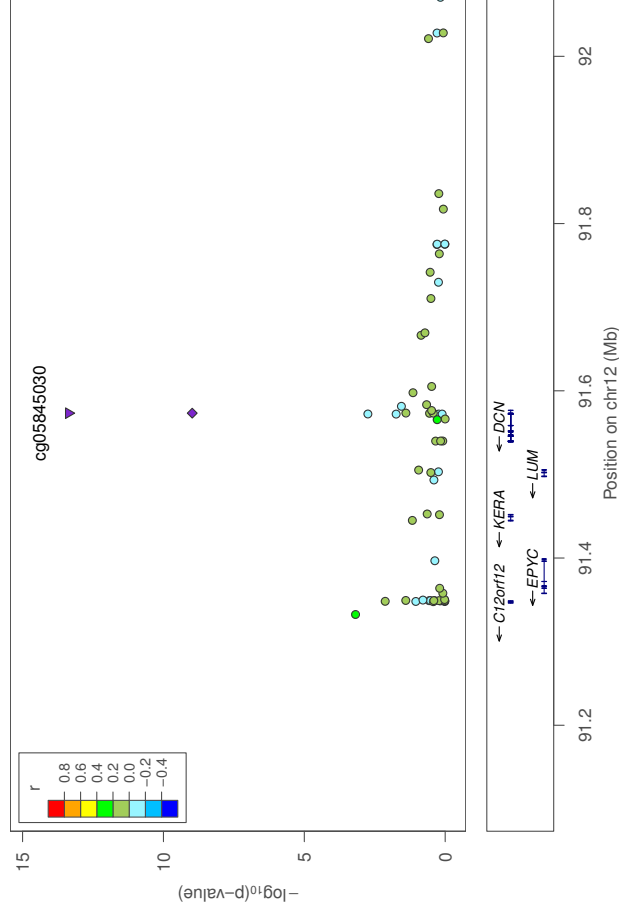

# DRAM1

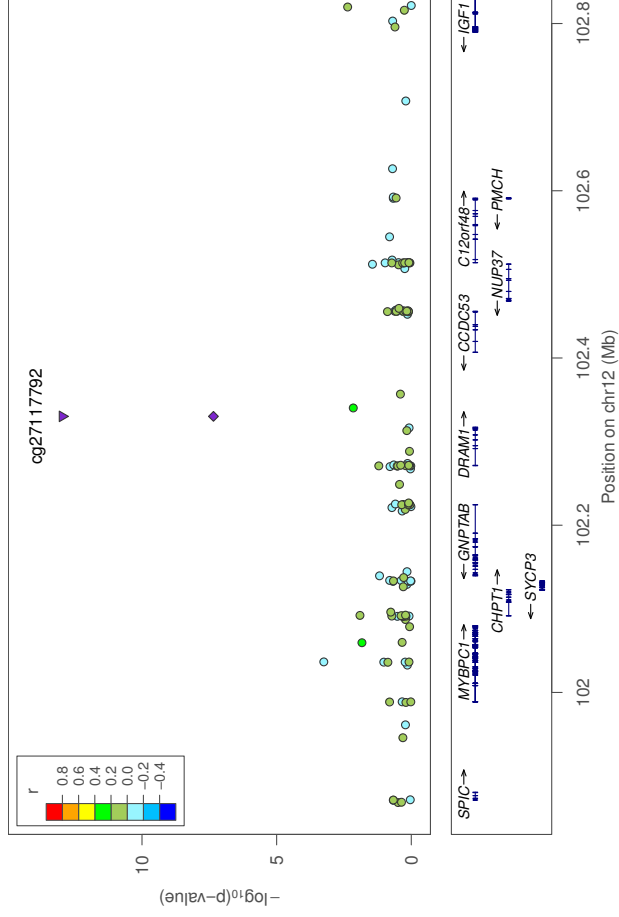

# UBE2L5P

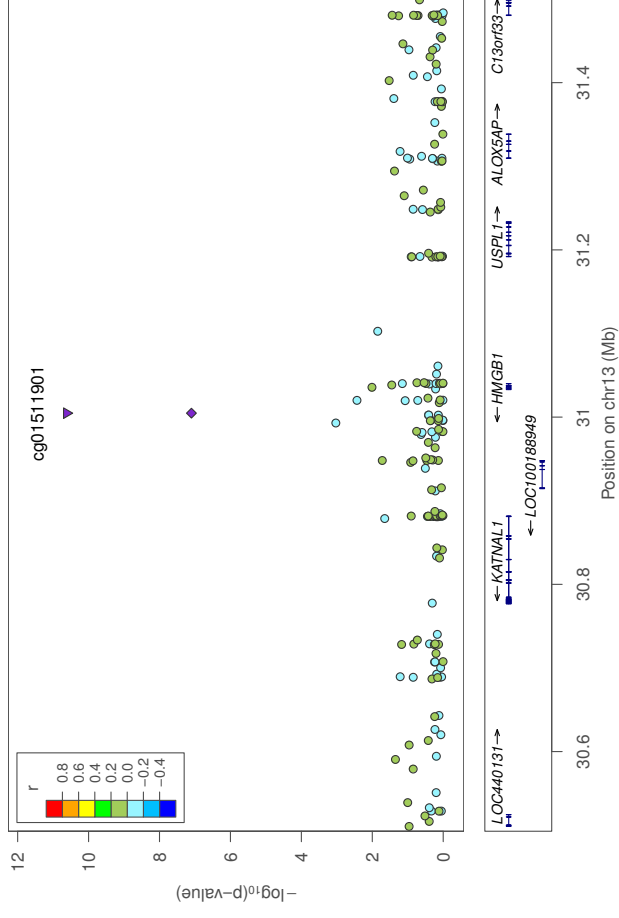

# UFM1

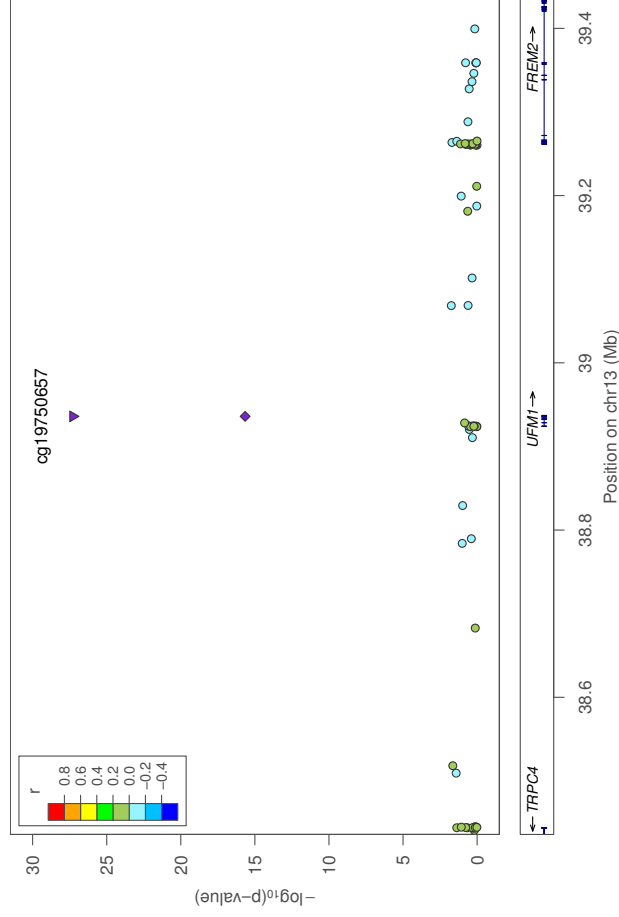

# LINC00598

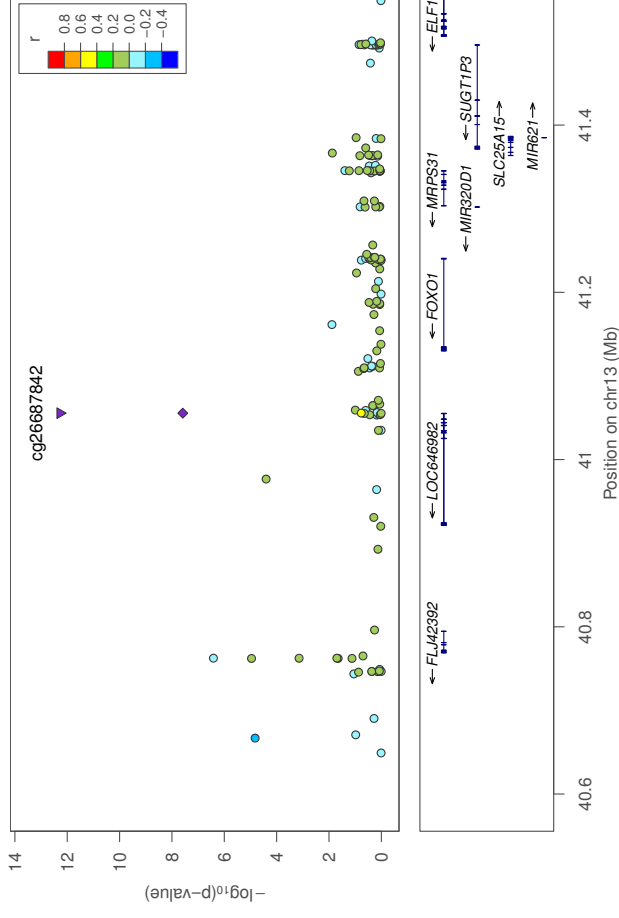

## SMIM2-AS1

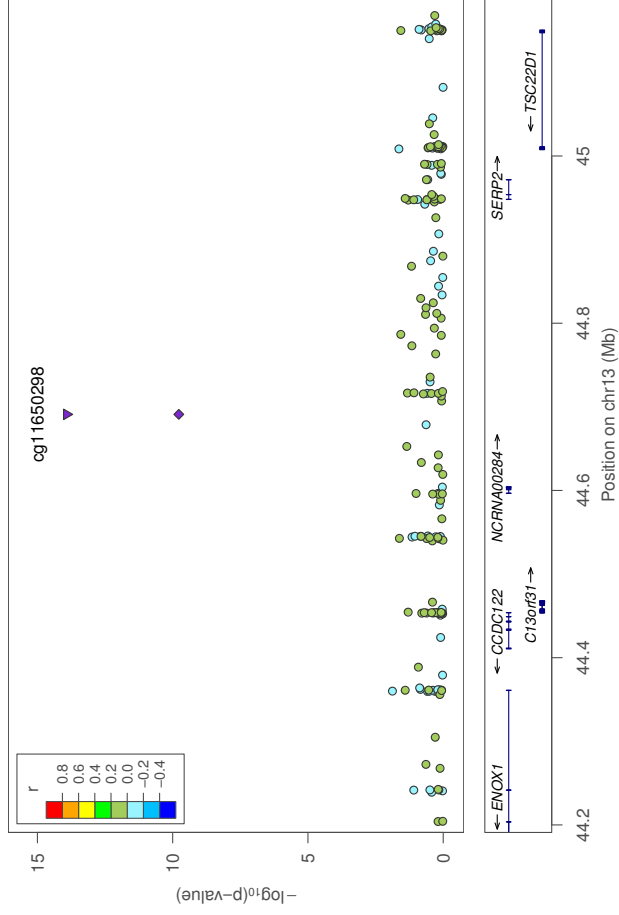

## RNASE10

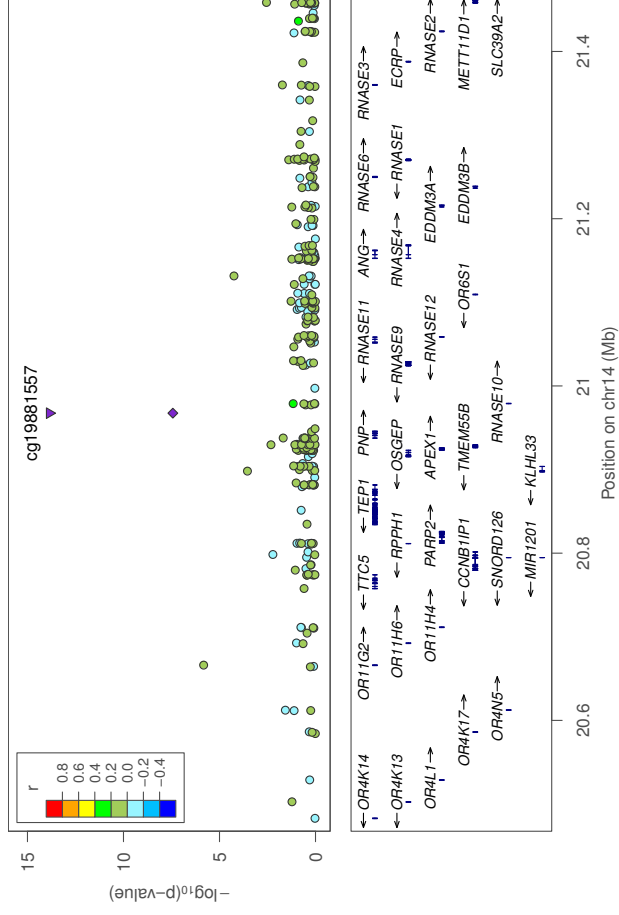

## CPNE6

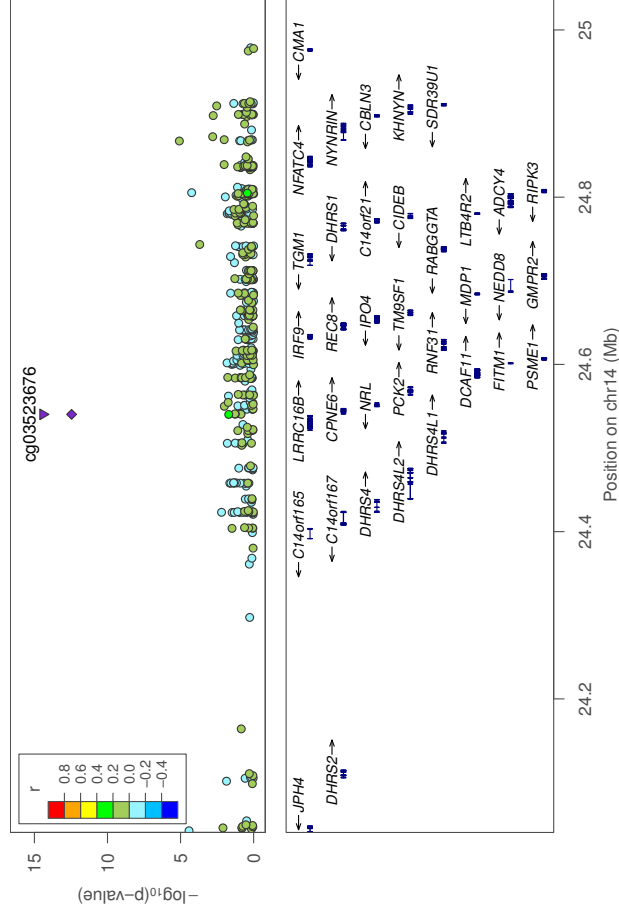

## RPL10L

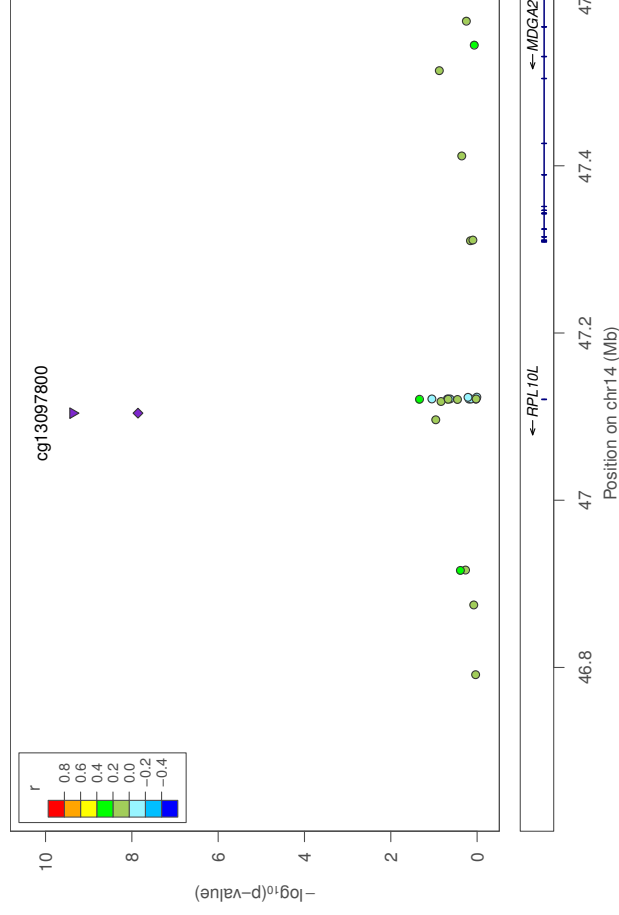



## HSPA2

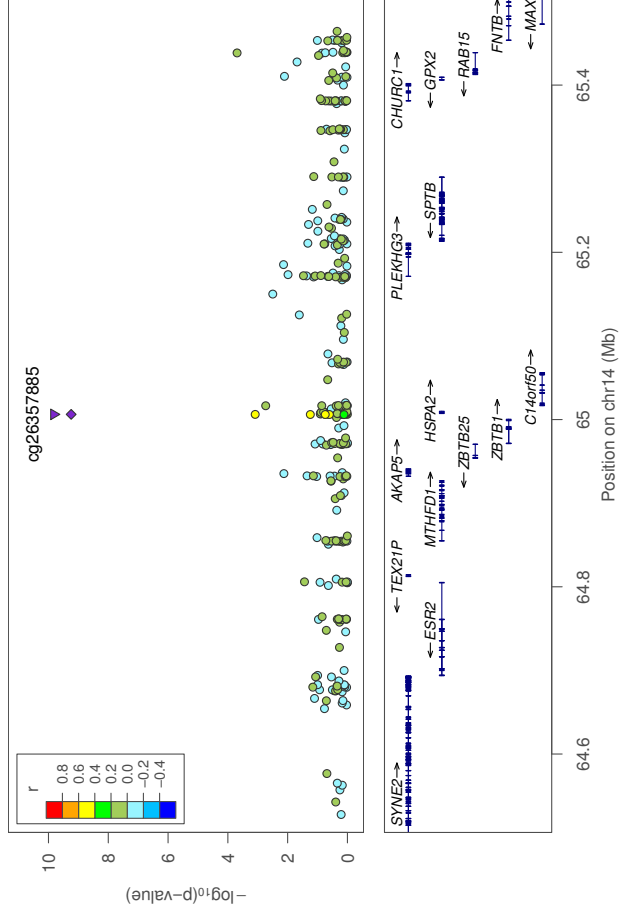

## ZC3H14

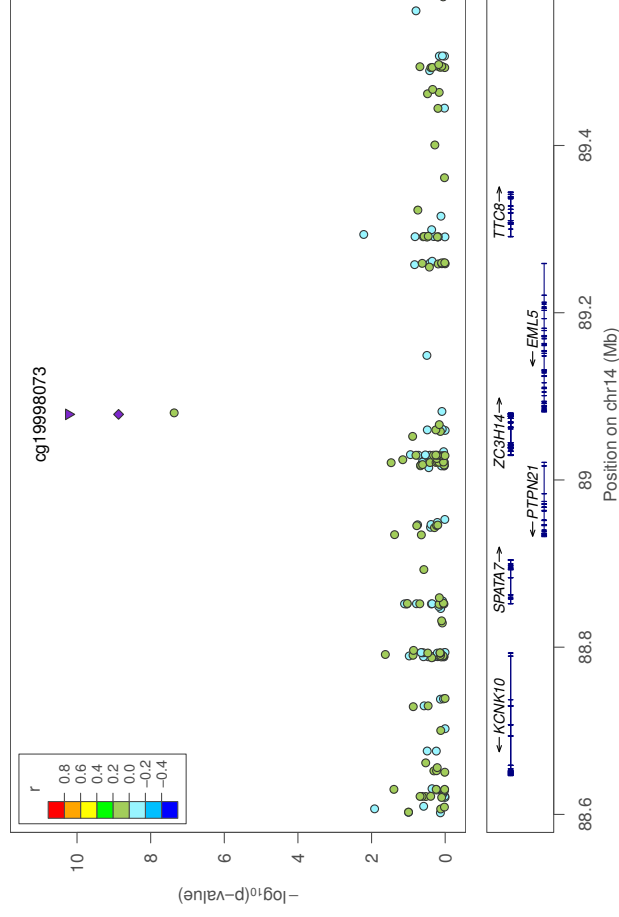

## ELMSAN1

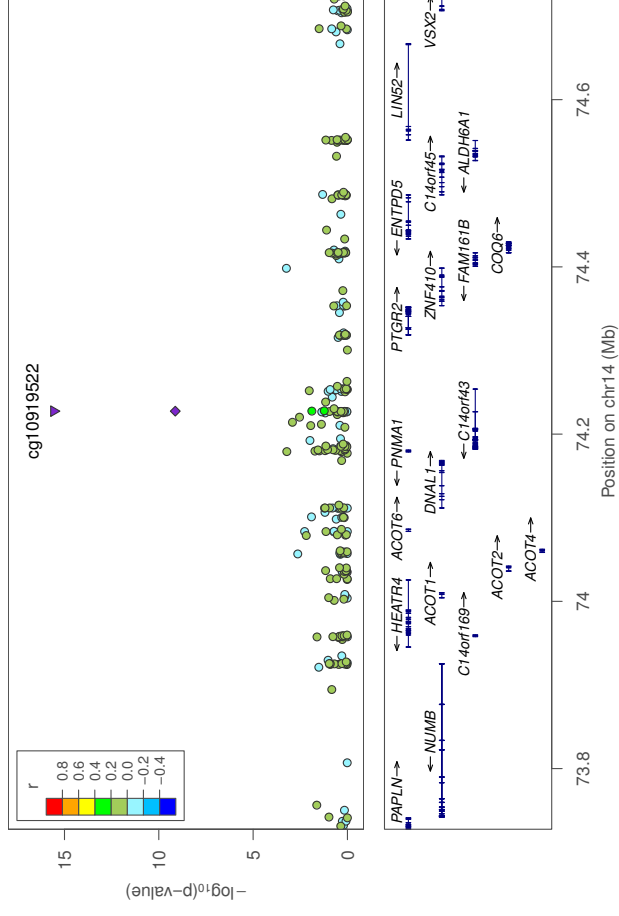

## GPR68

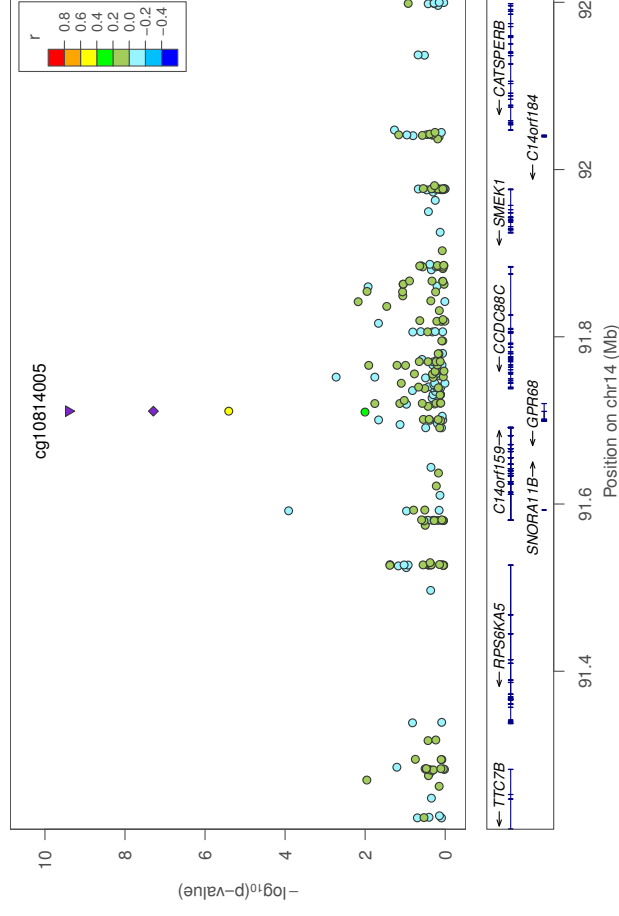

## IGHA2

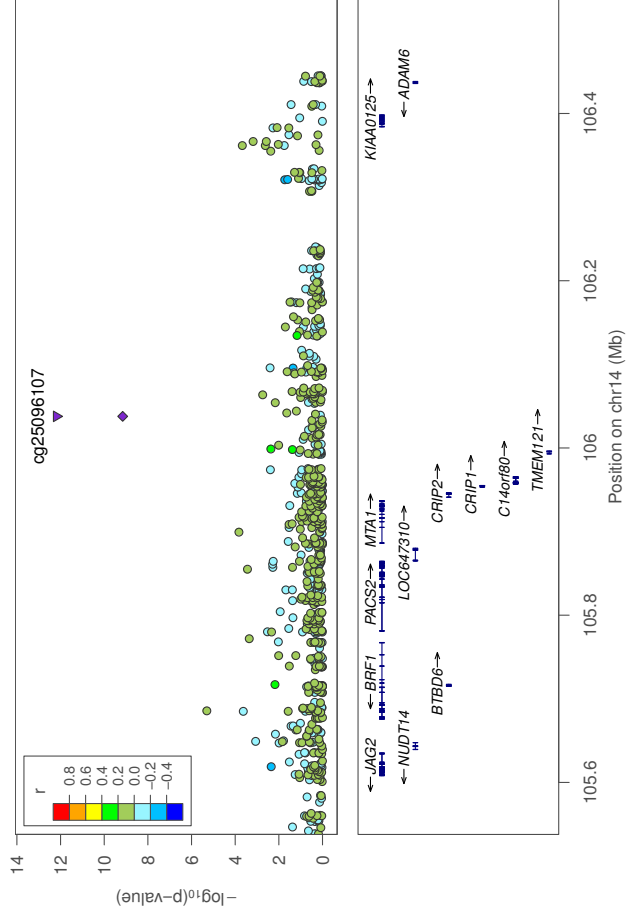

## ATP10A

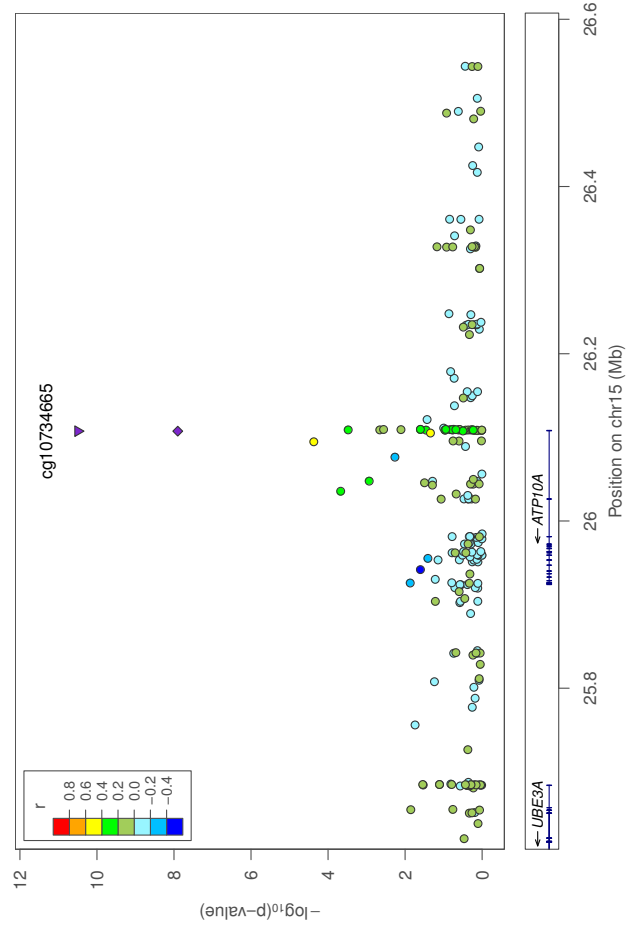

## APBA2

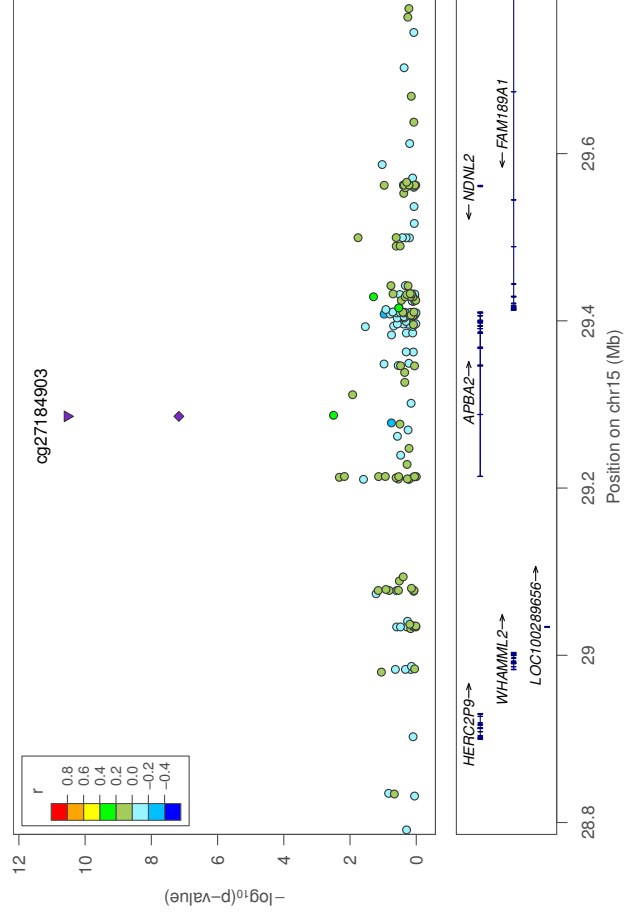

## MYO5C

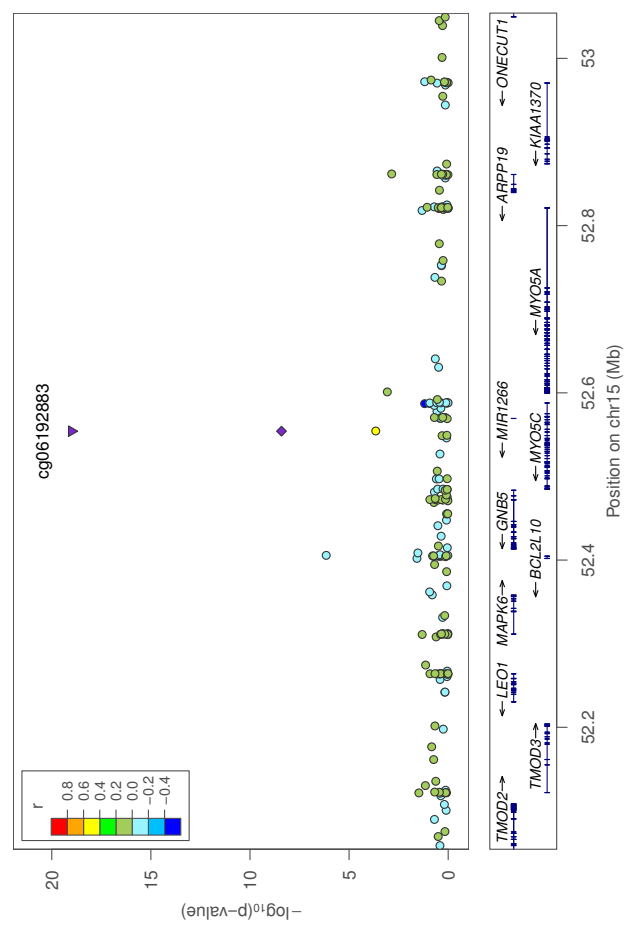

## DAPK2

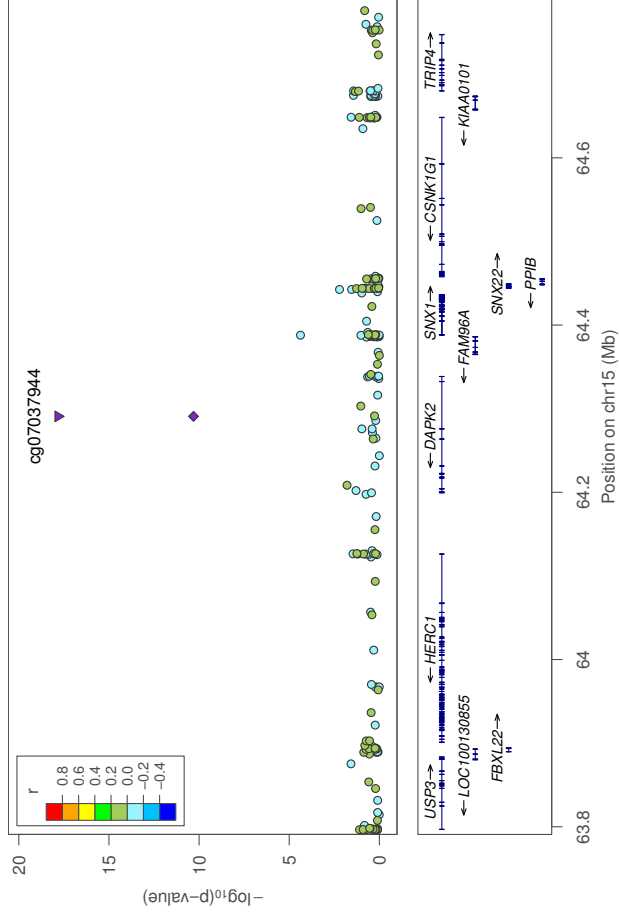

## ACSBG1

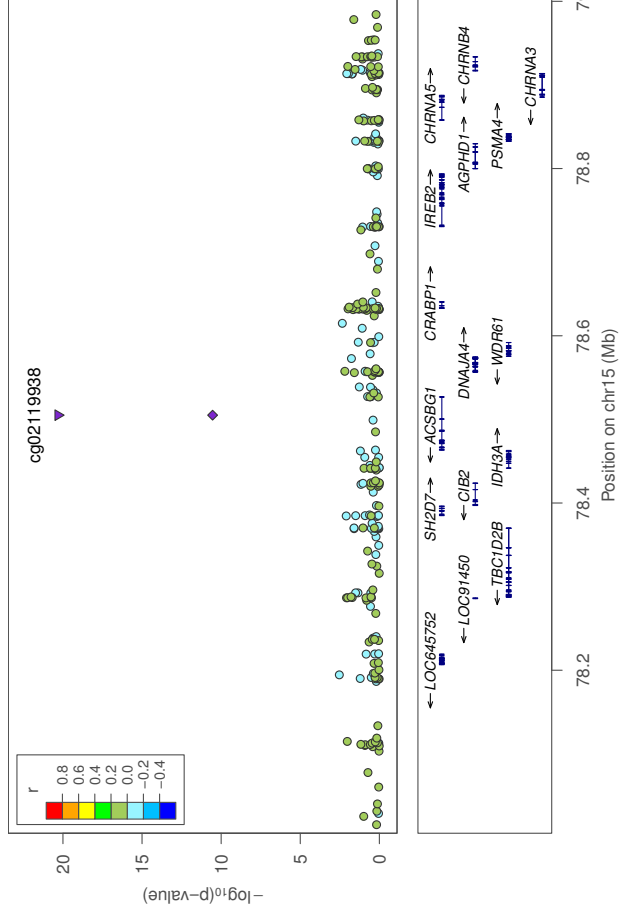

## FSD2

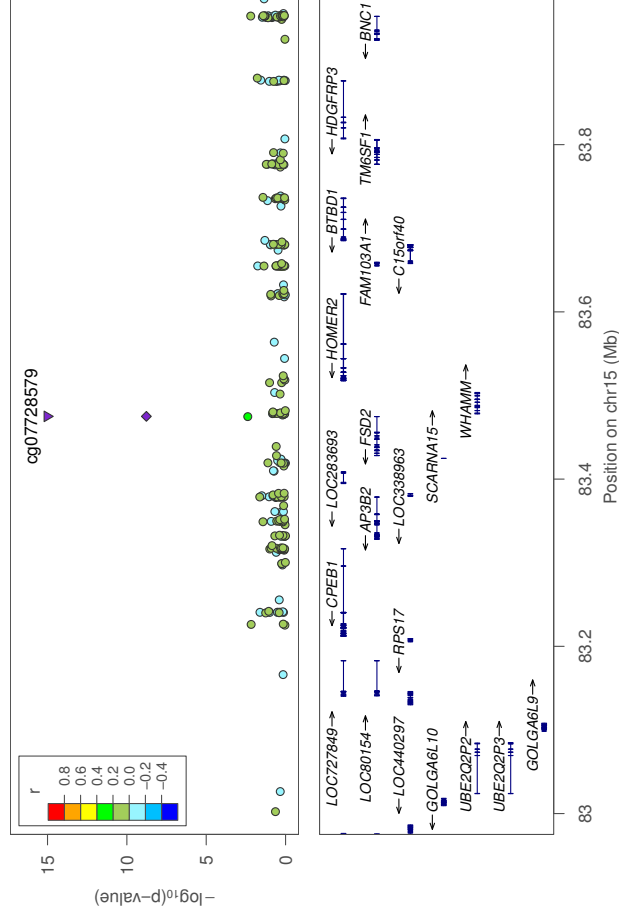

## MAN2A2

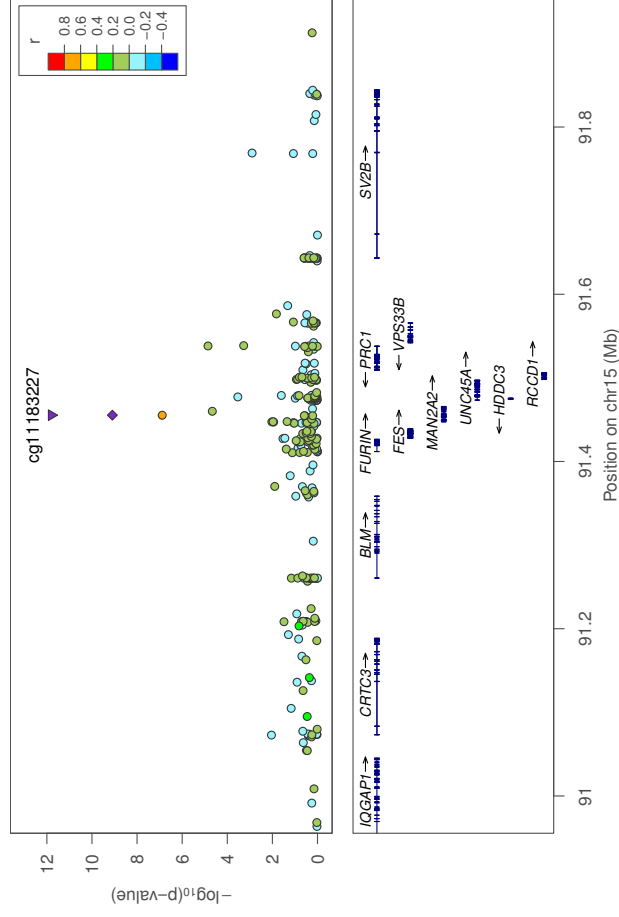

# SLCO3A1

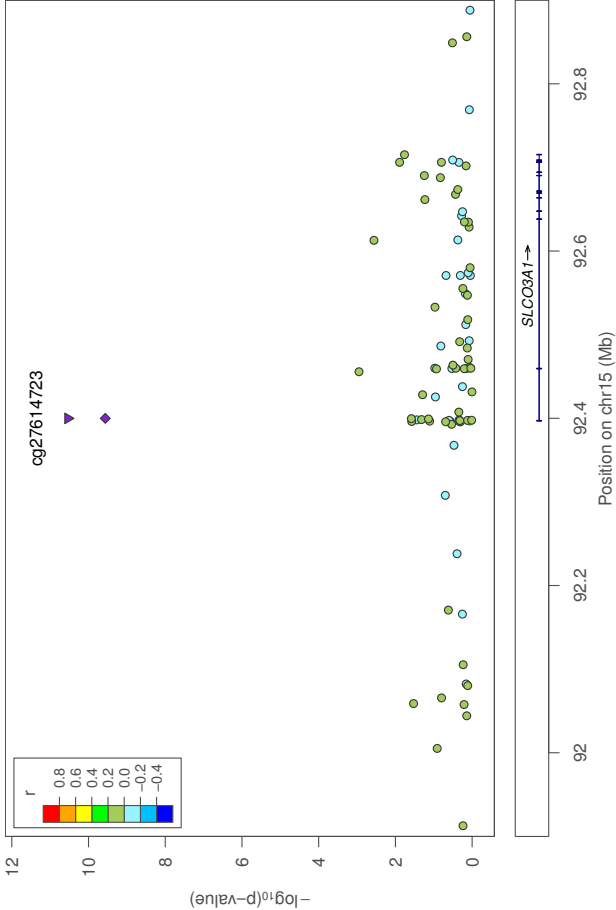

# AXIN1

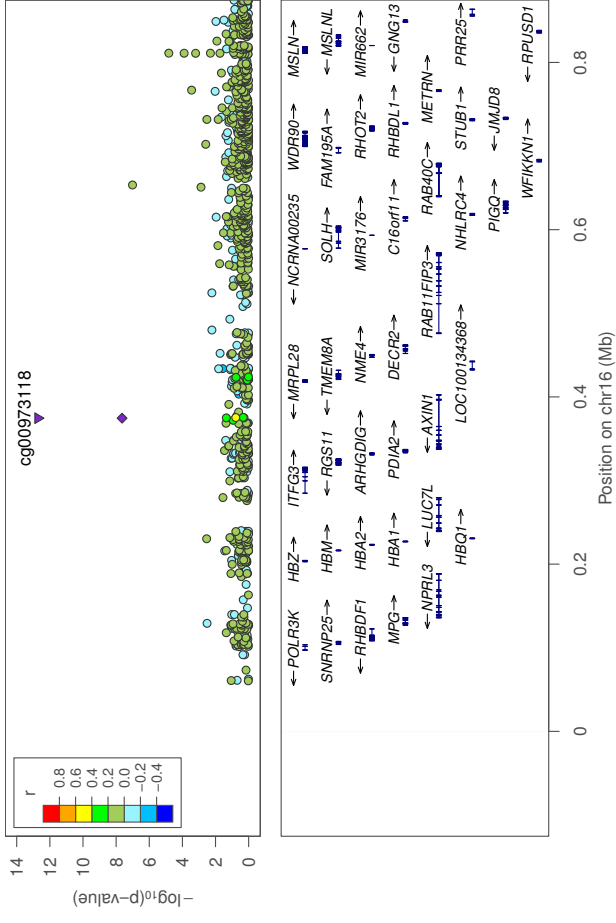

# SLC9A3R2

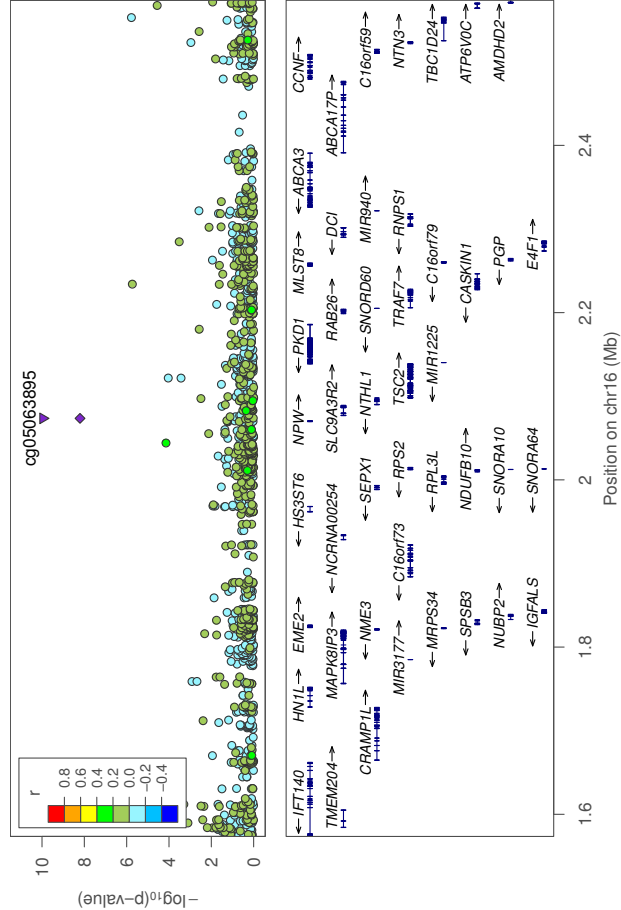

# RMI2

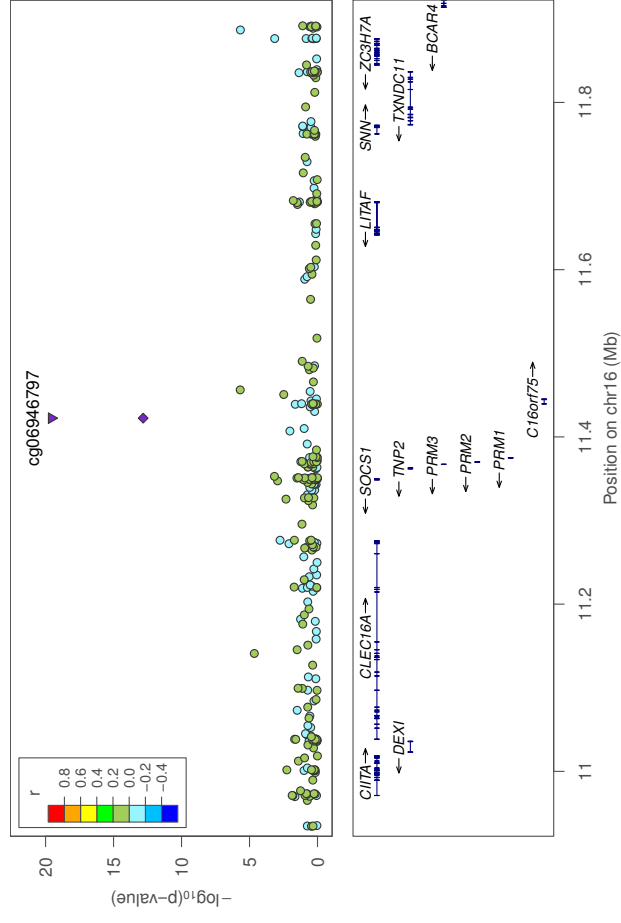

## NFATC2IP

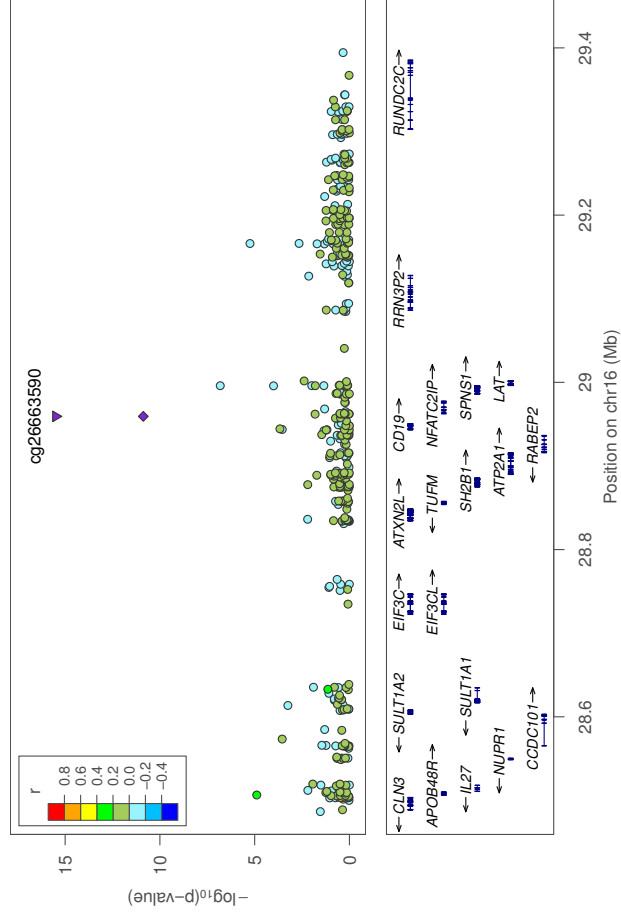

## ZNF48

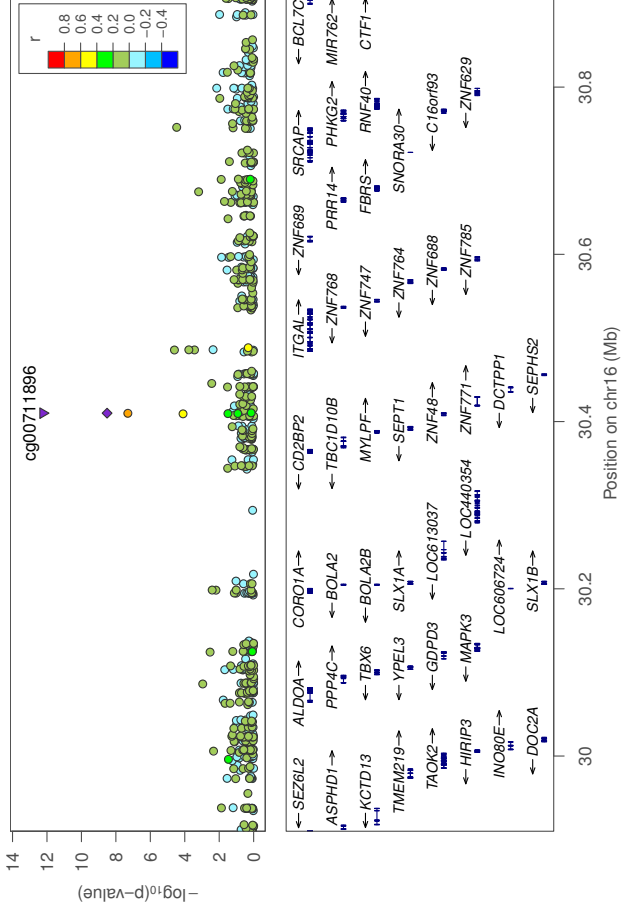

## NOD2

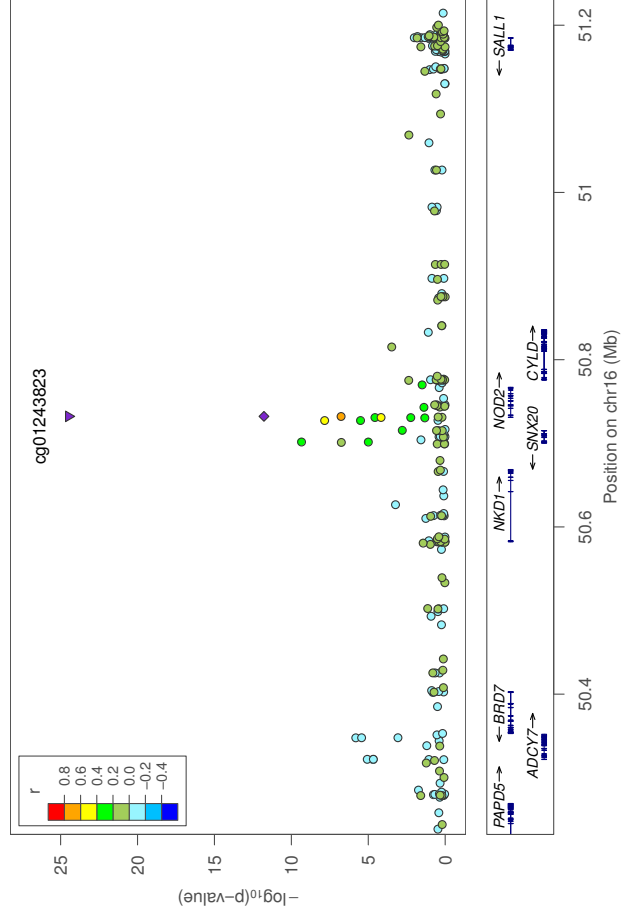

## BBS2

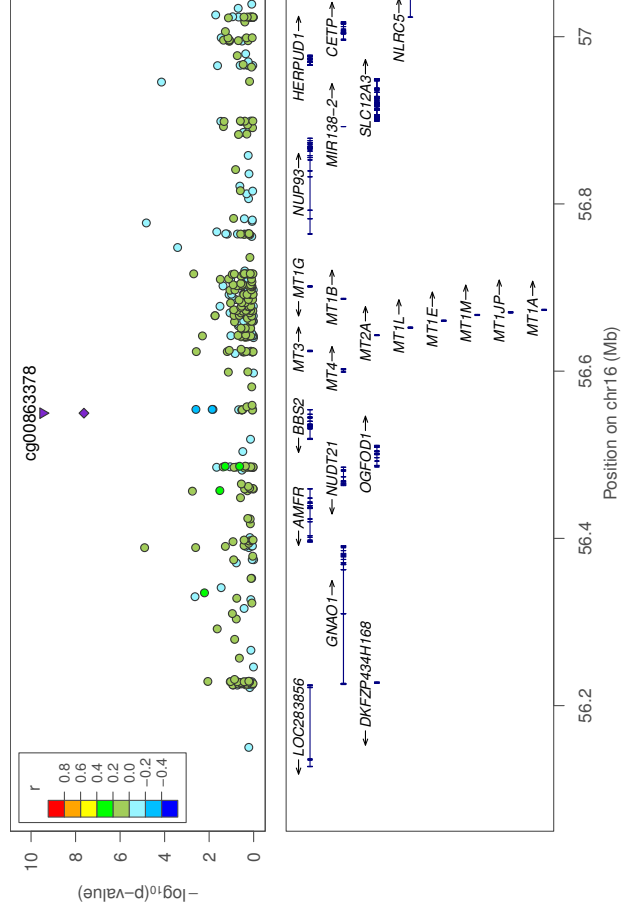

## DUS2L

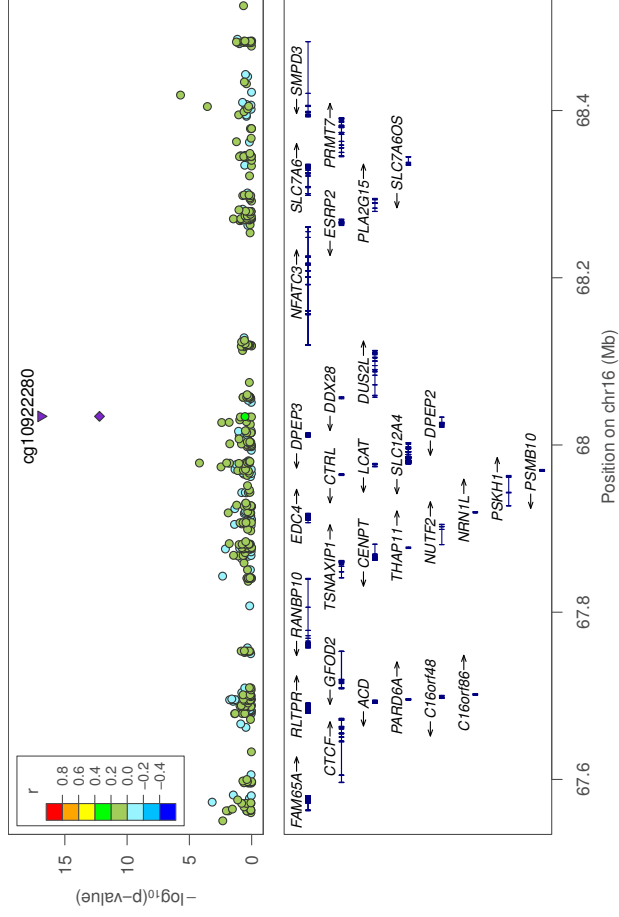

## MAF

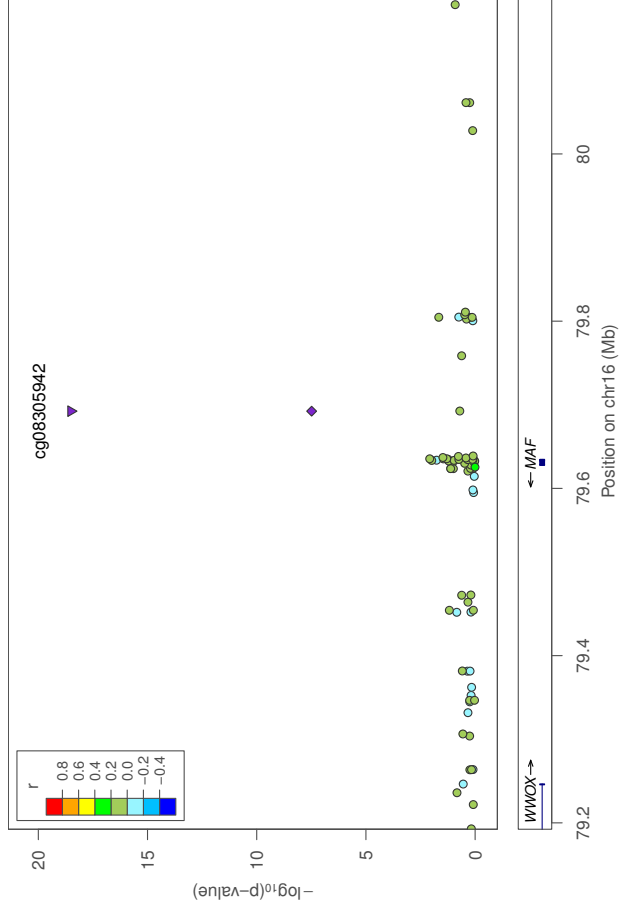

## GSE1

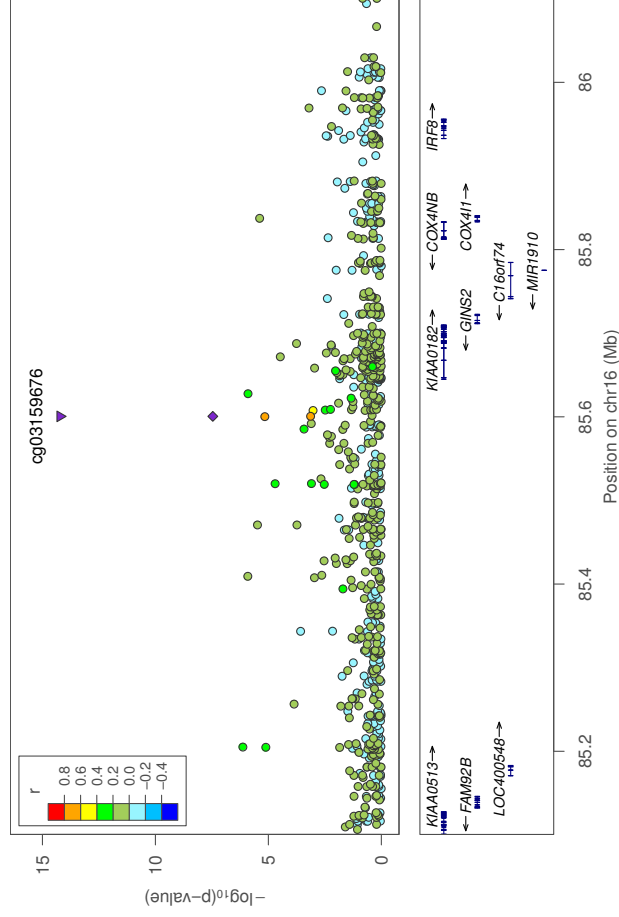

## SLC7A5

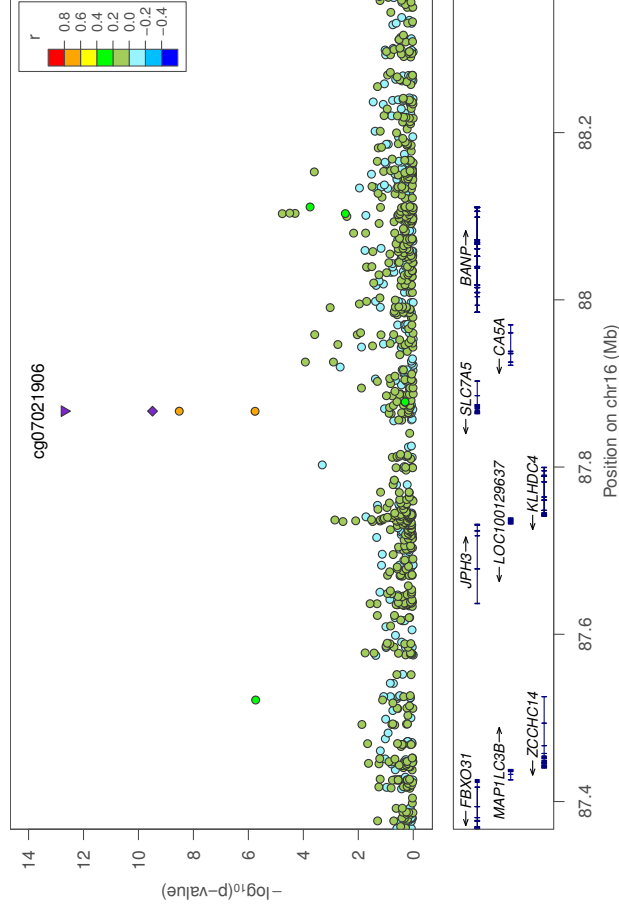

### CBFA2T3

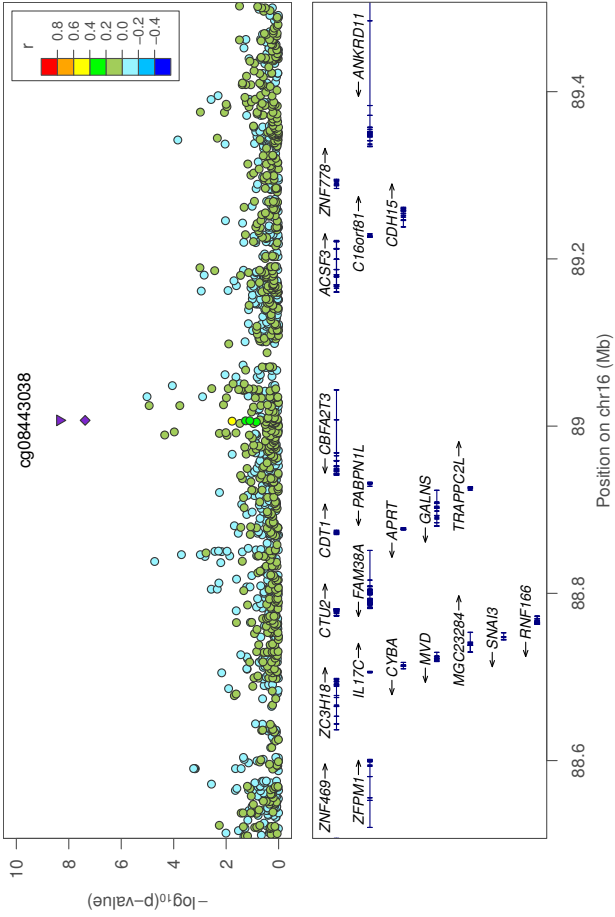

### ANKRD11

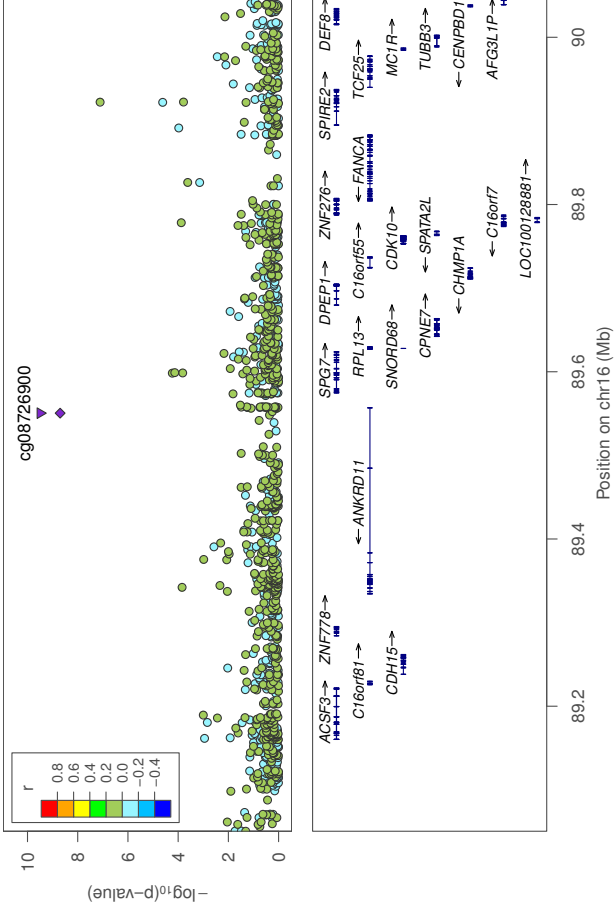

### CLUH

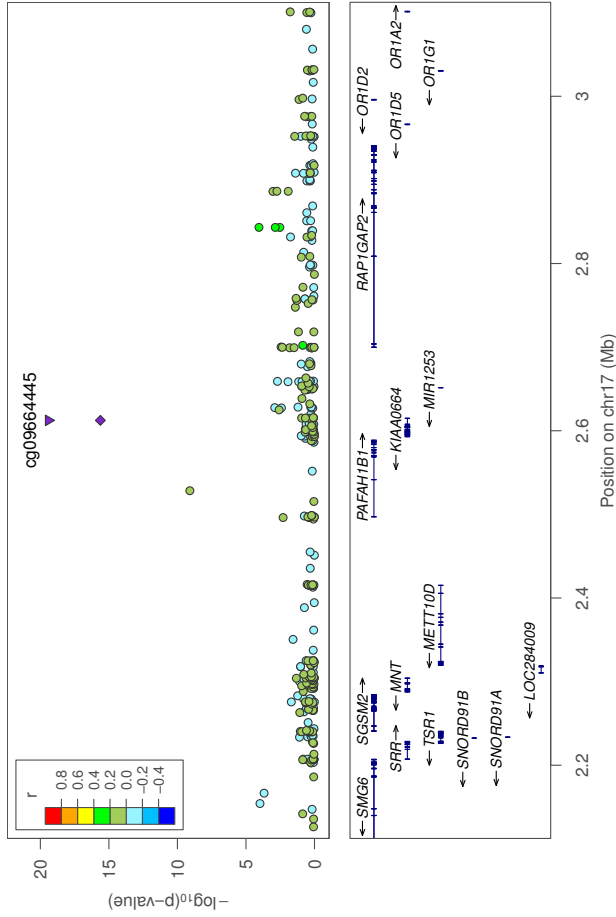

### ZZEF1

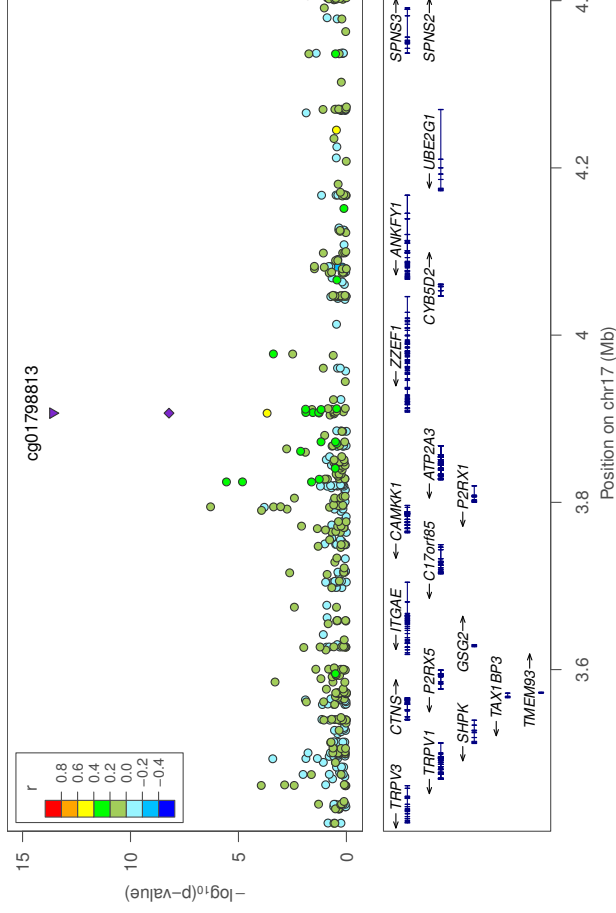

## ACADVL

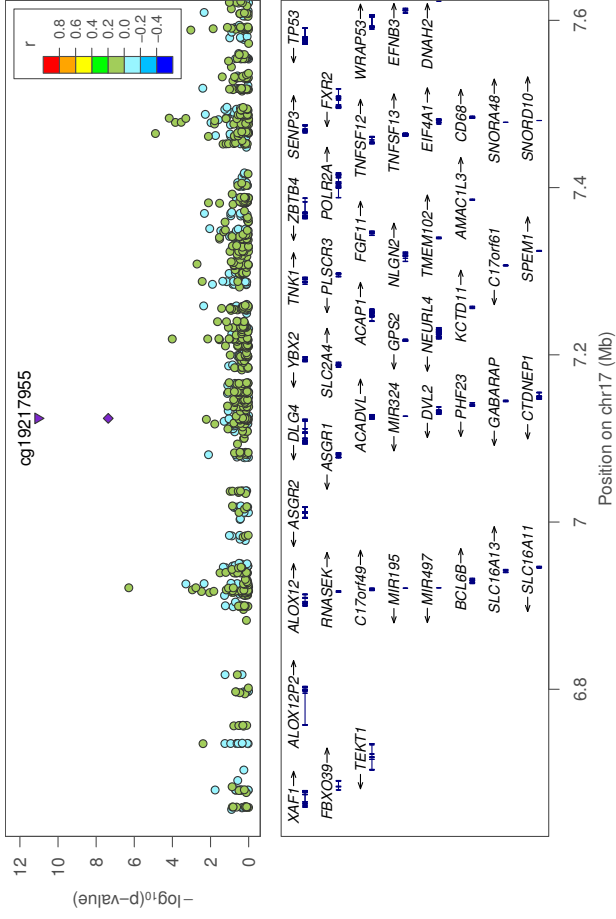

## CHD3

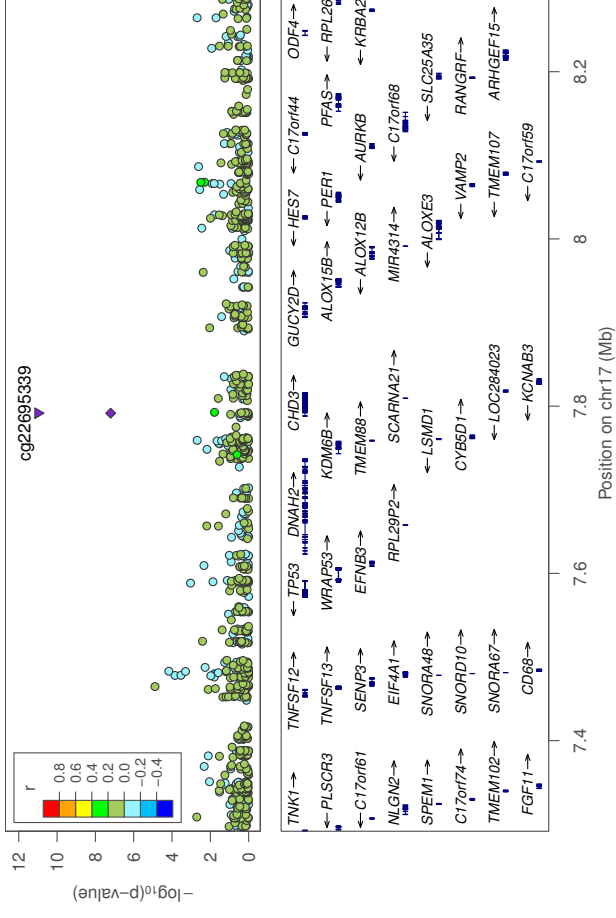

## SREBF1

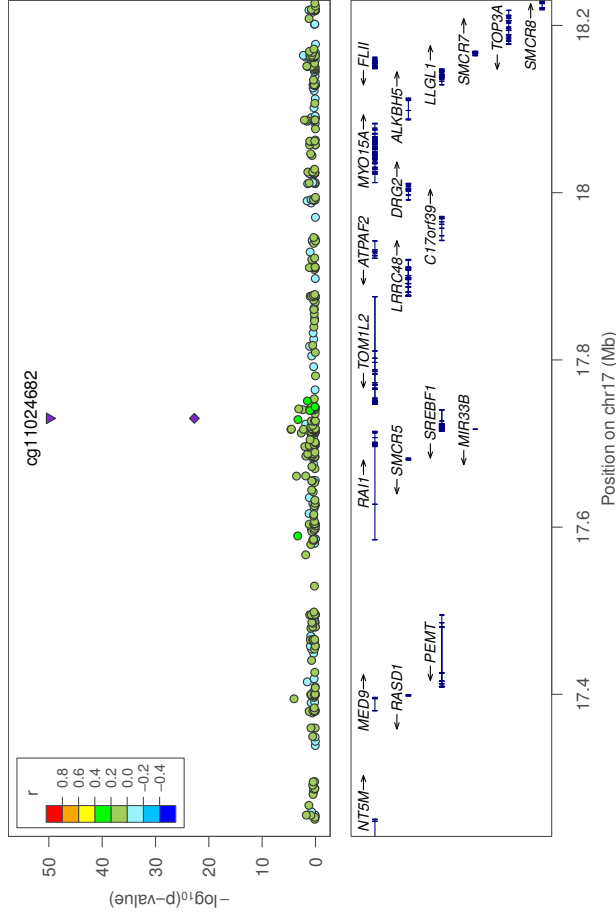

## AKAP10

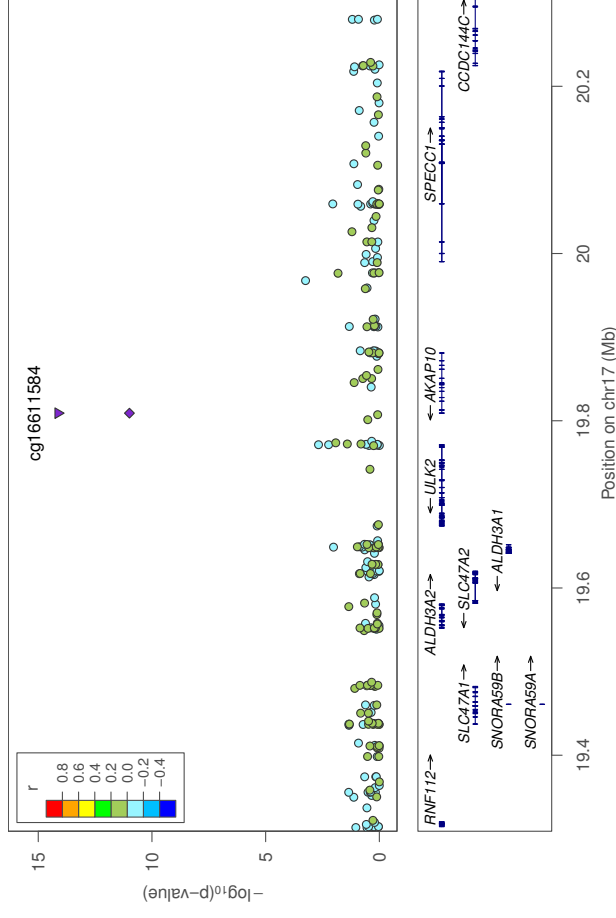



## USP22

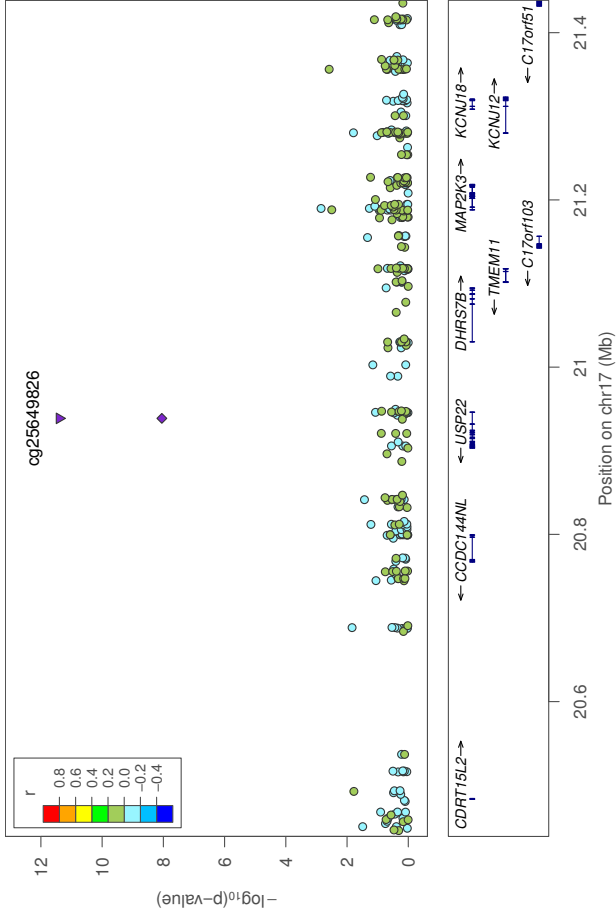

## VPS25

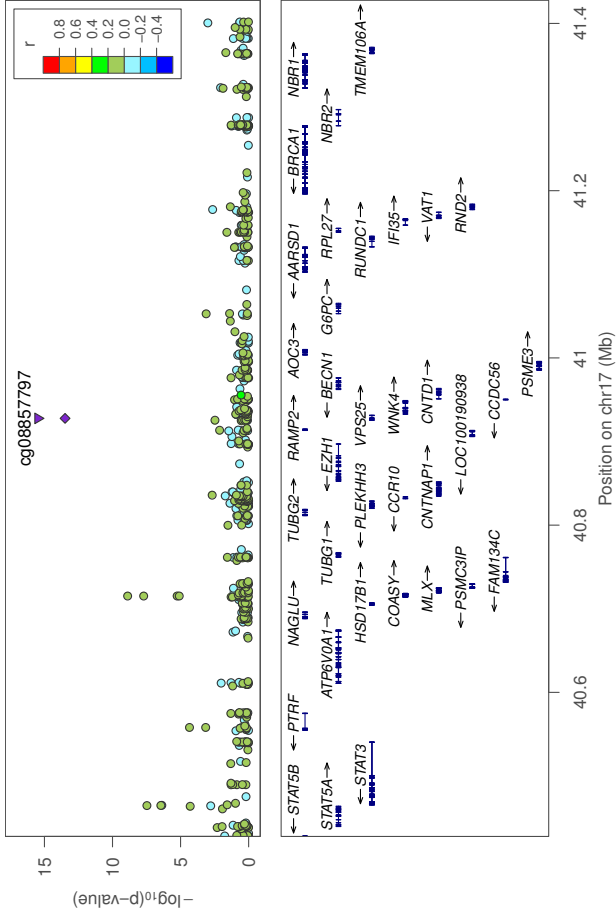

## RARA

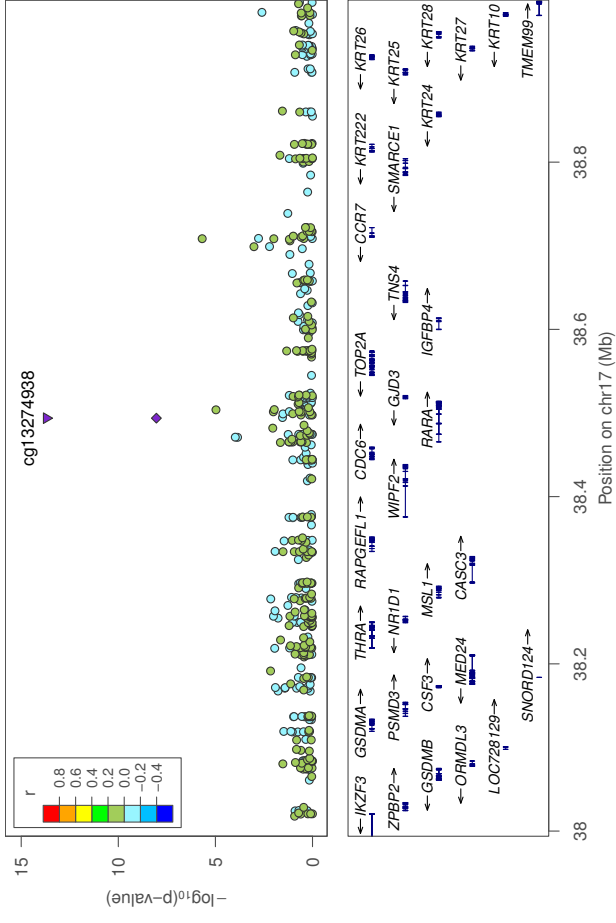

## MEOX1

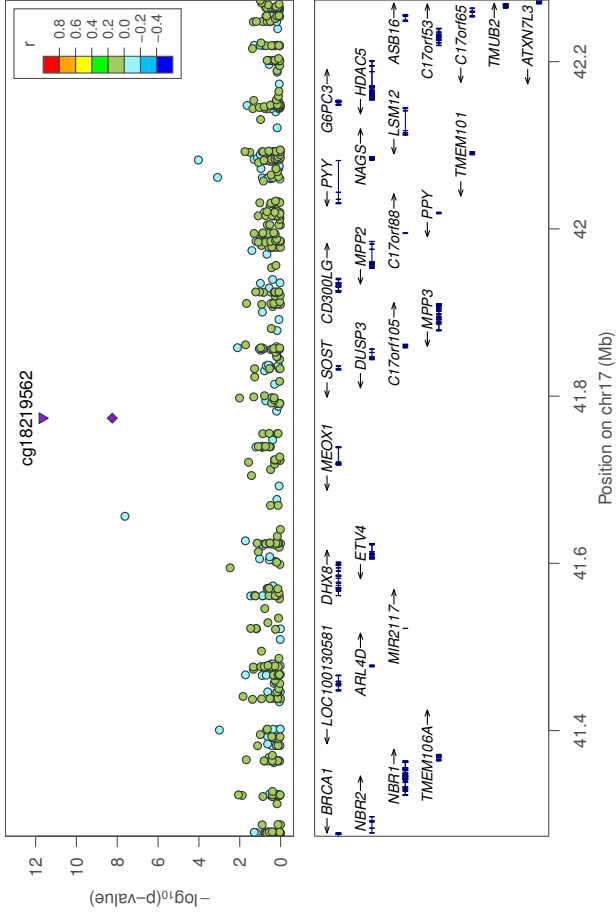

# NFE2L1

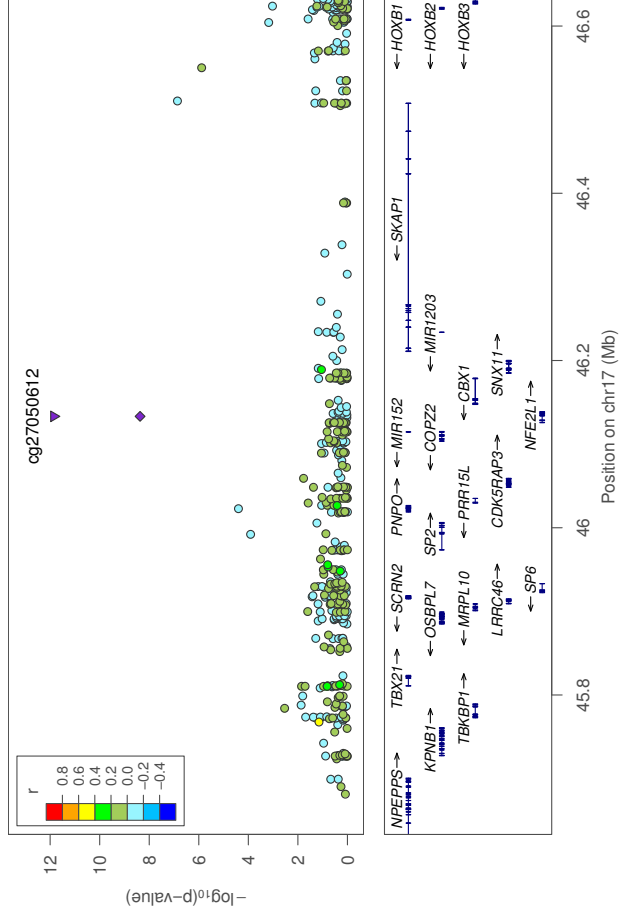

# VMP1

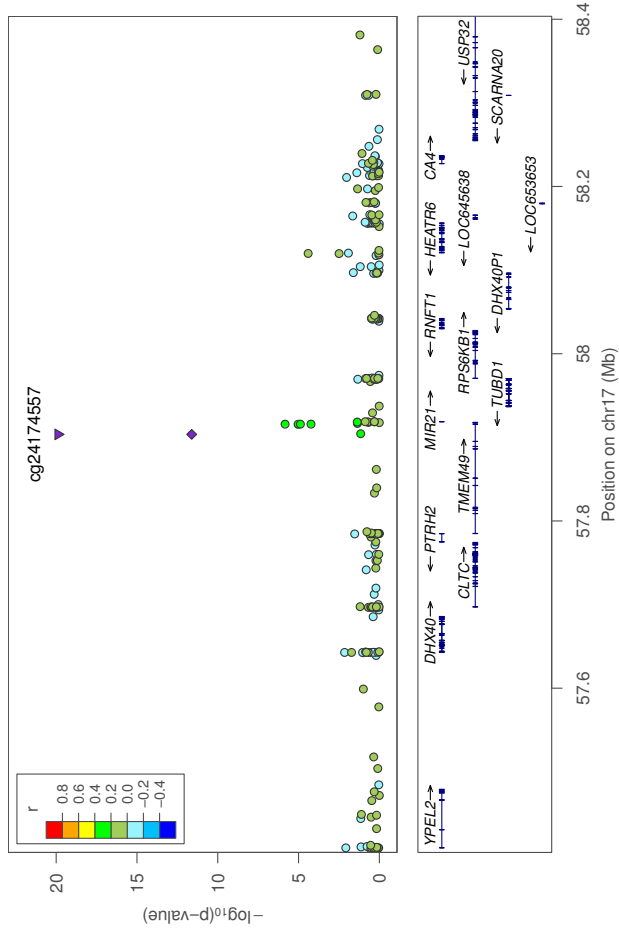

# PHOSPHO1

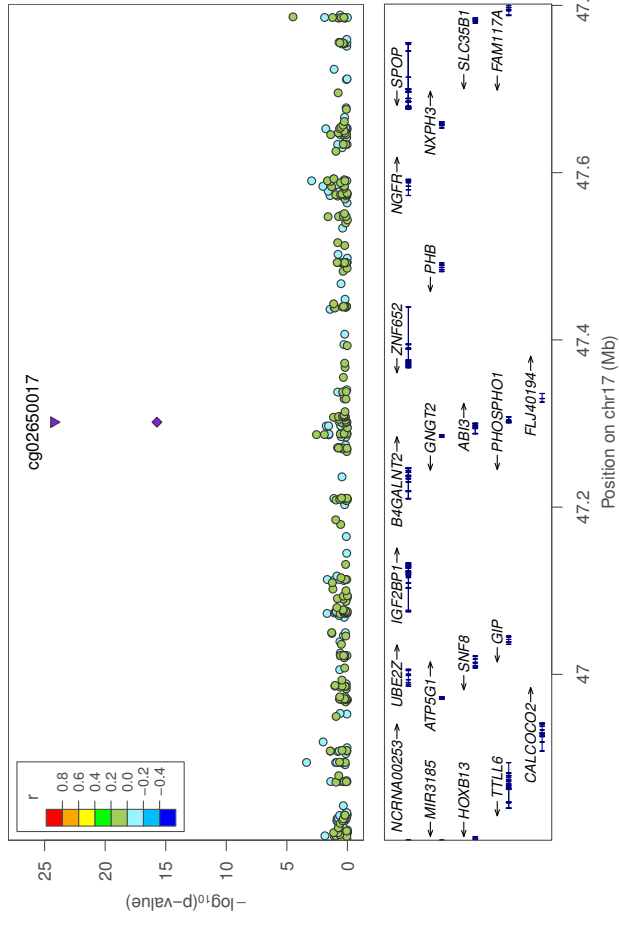

# CPSF4L

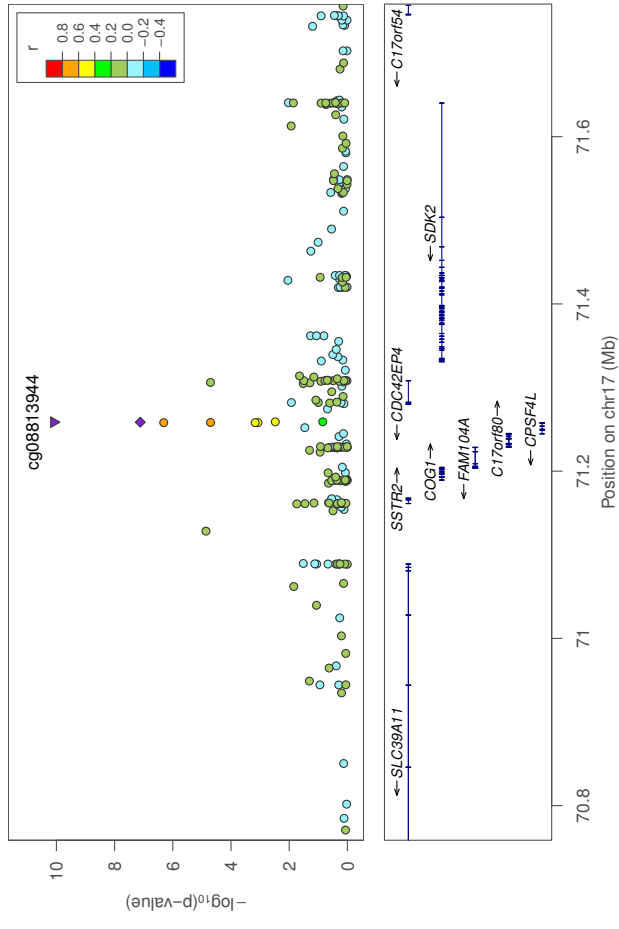

## SLC9A3R1

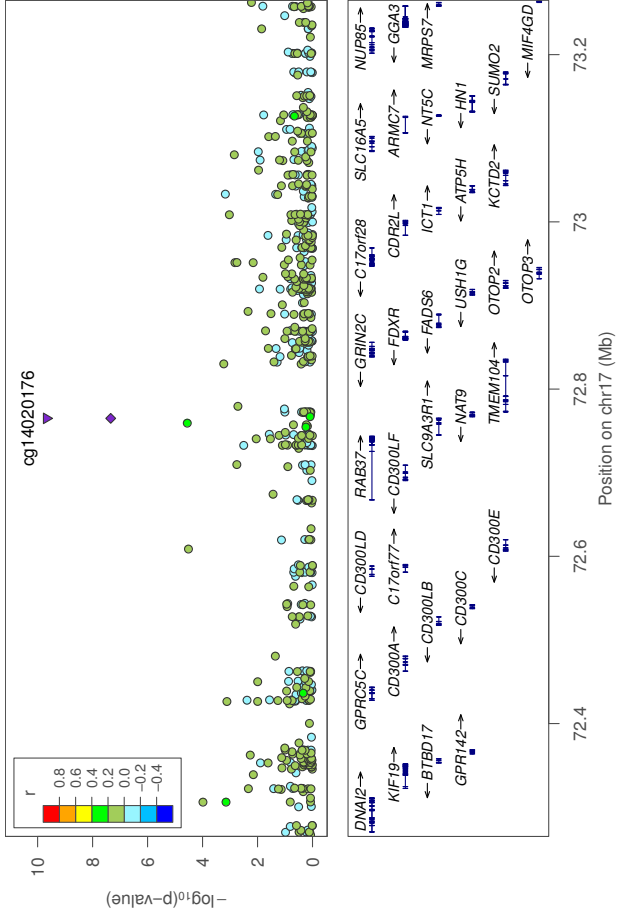

## SOCS3

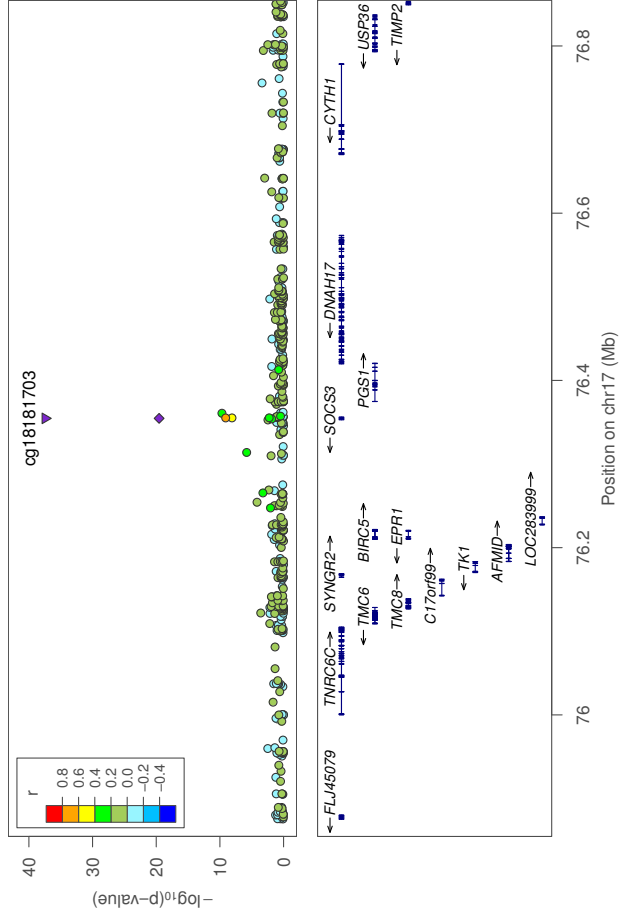

## RHBDF2

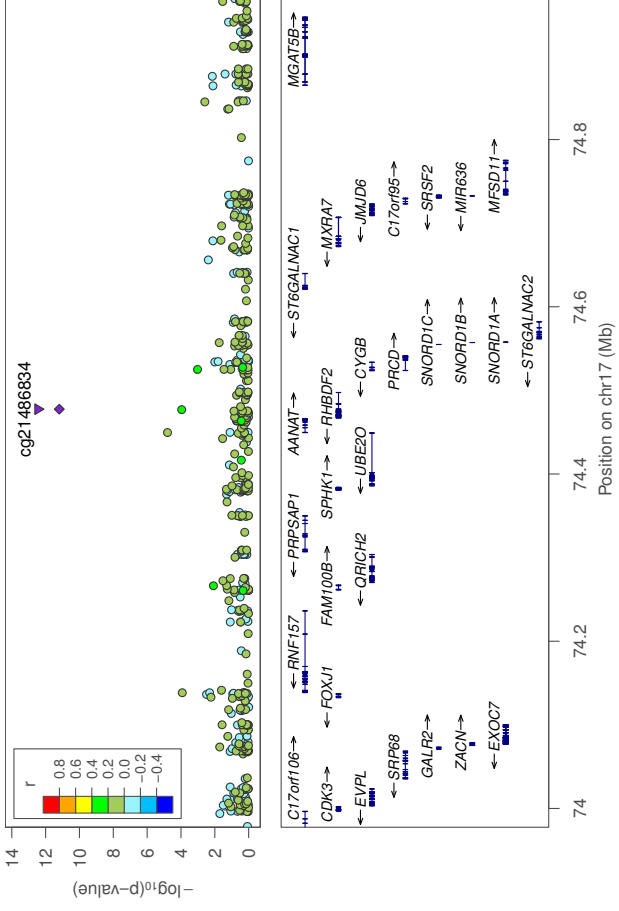

## LGALS3BP

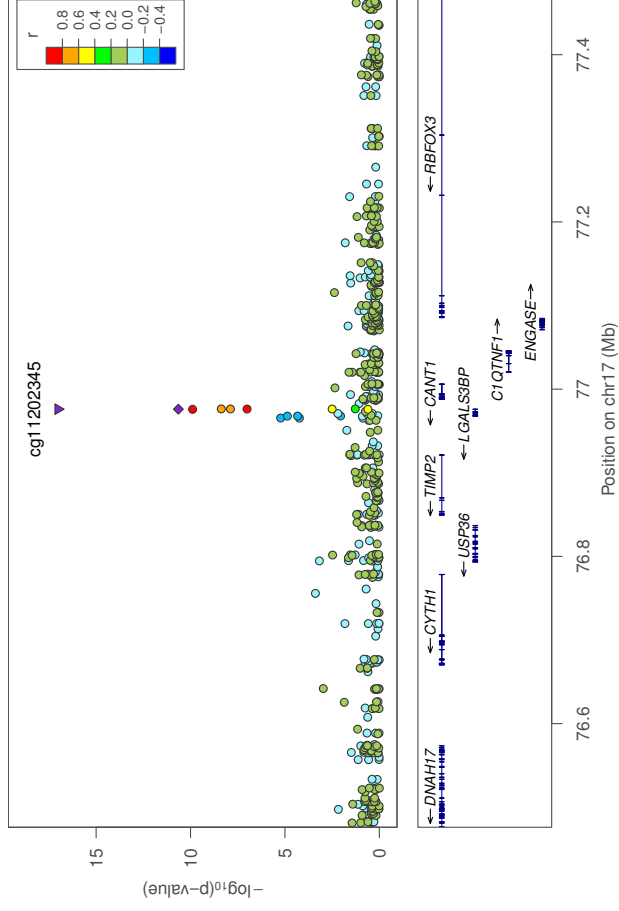

### P4HB

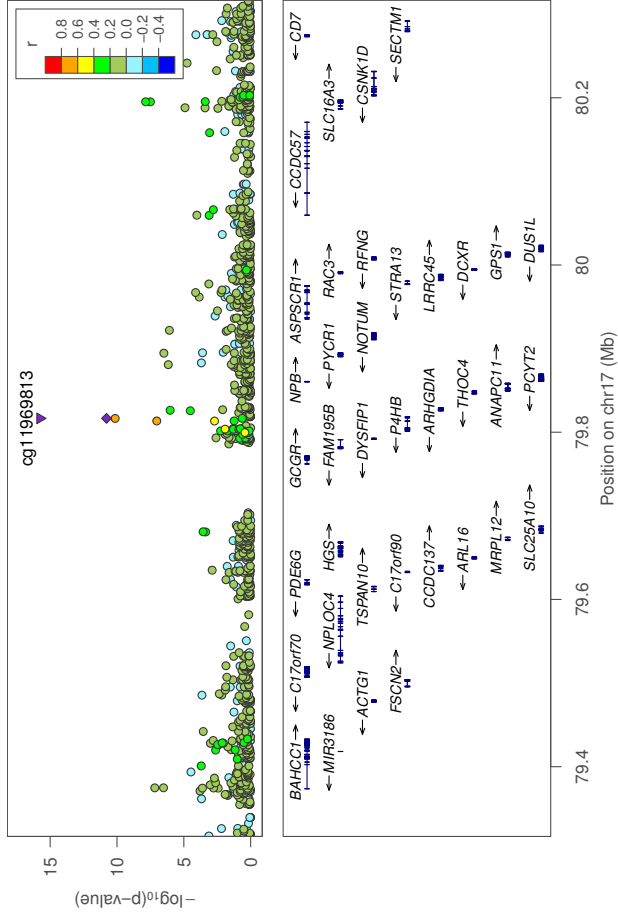

### SBNO2

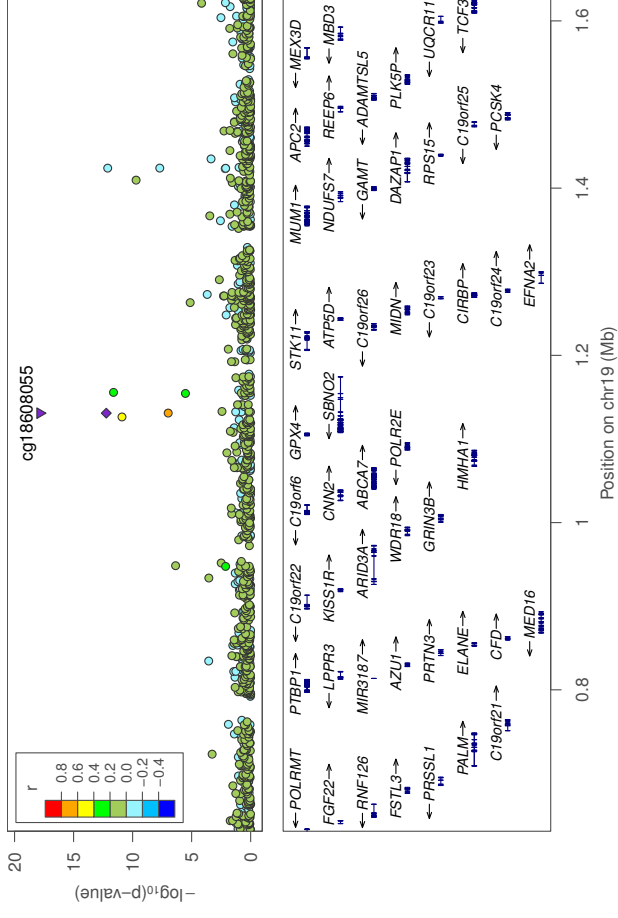

### CREB3L3

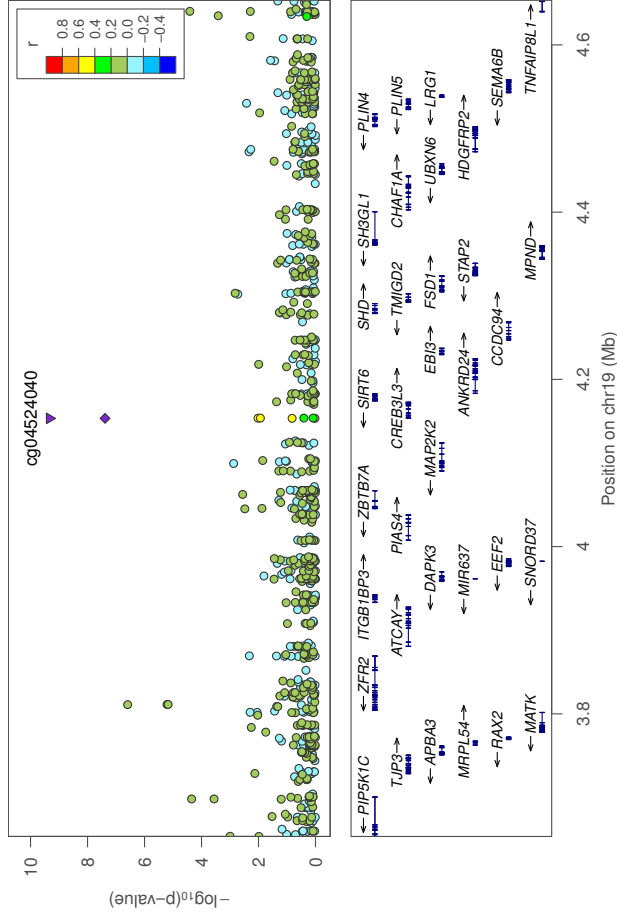

### ATG4D

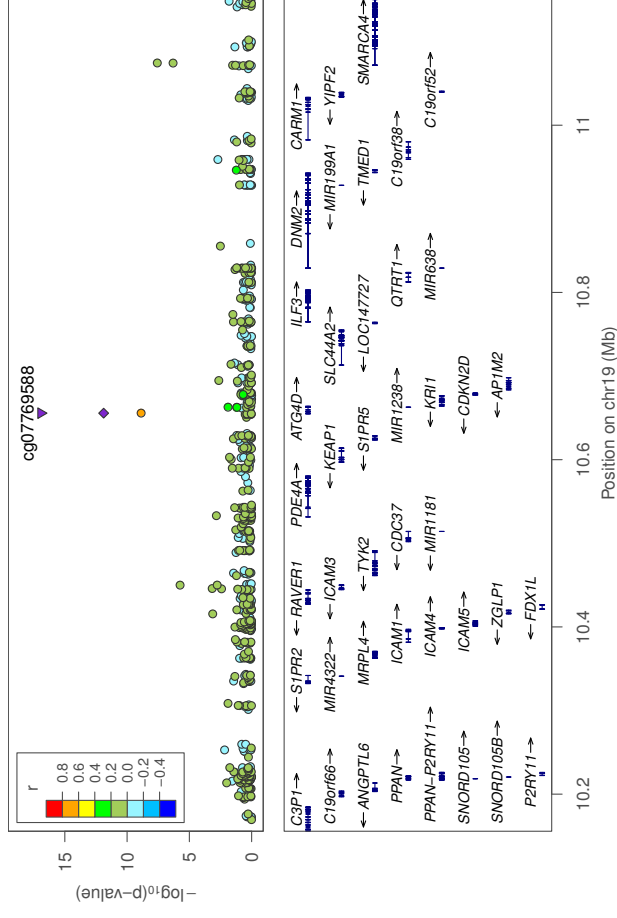

# PKN1

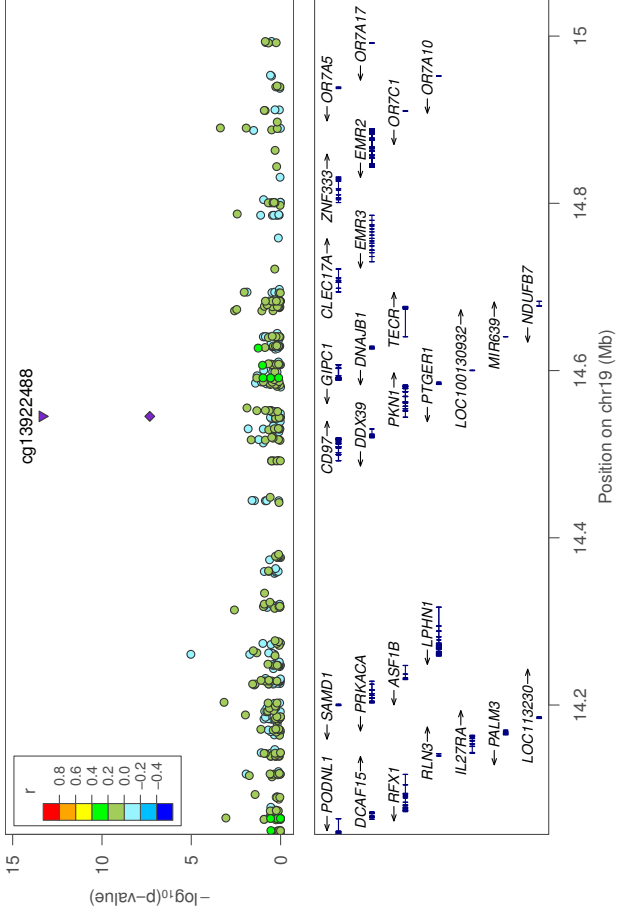

# UPF1

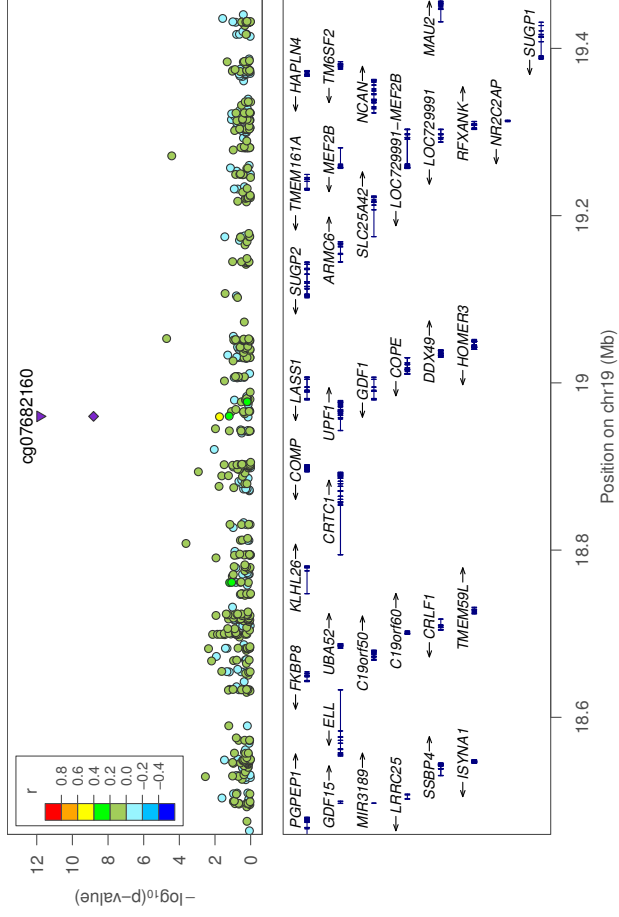

# MYO9B

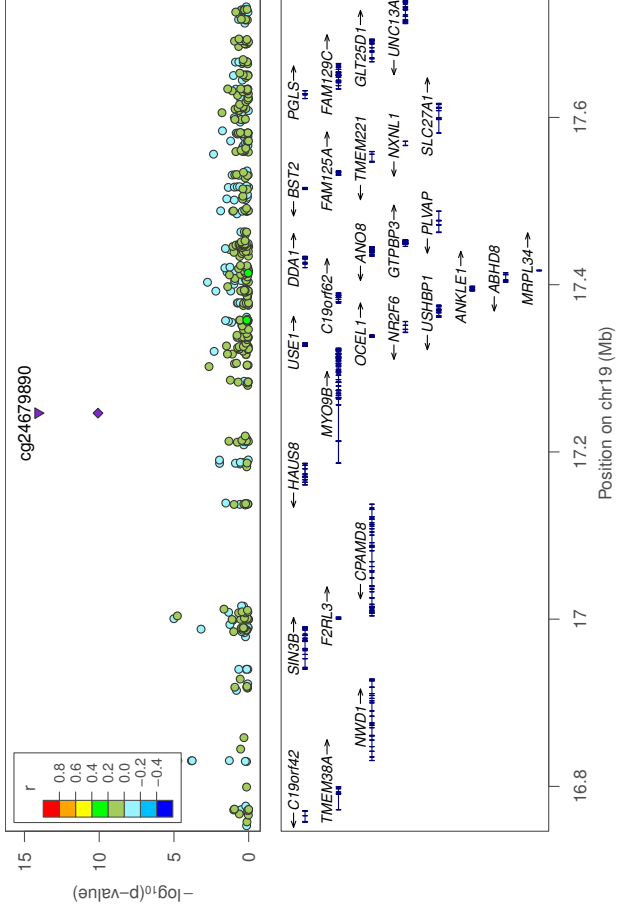

# DEDD2

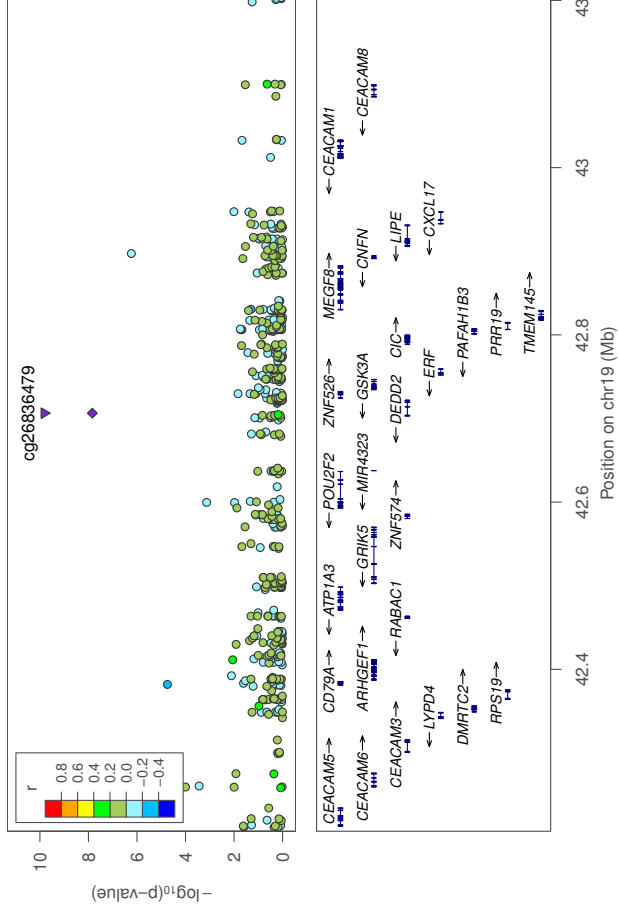

### BCL3

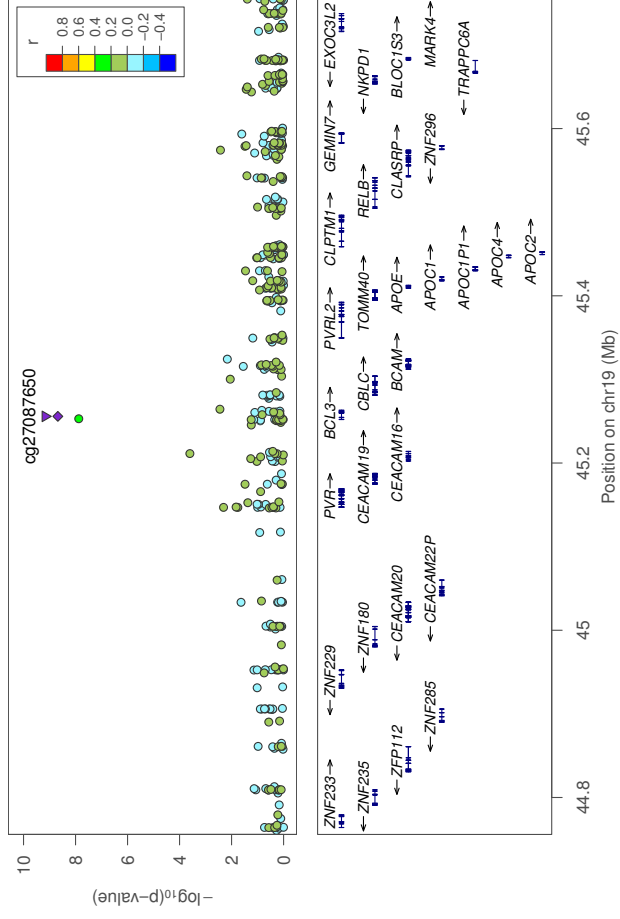

### SLC1A5

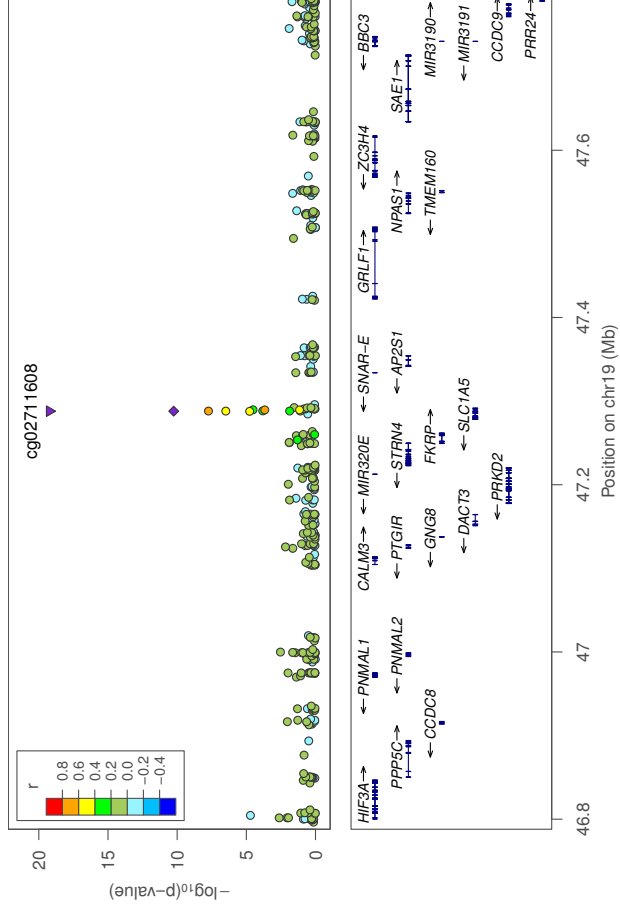

### ANGPT4

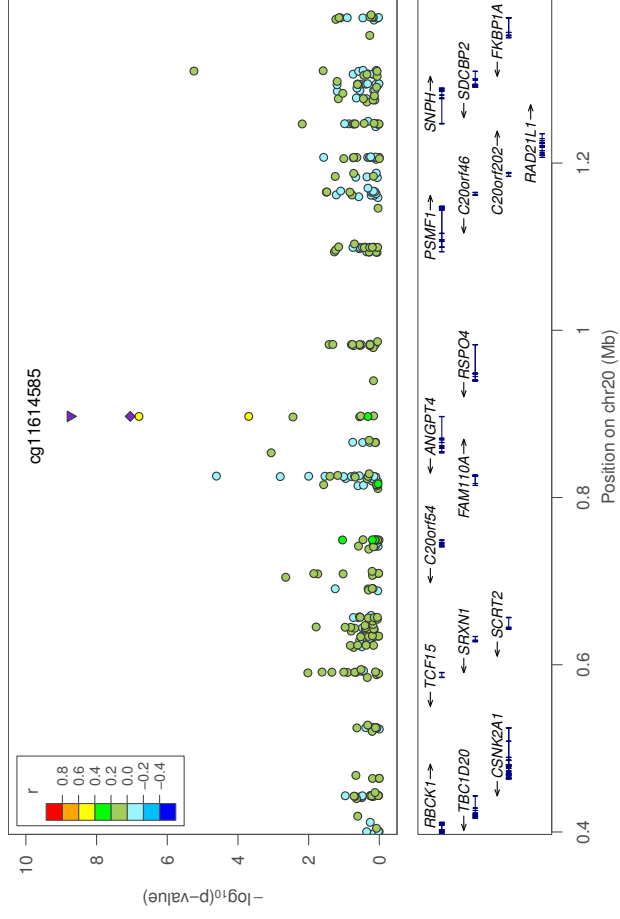

### PPIAP3

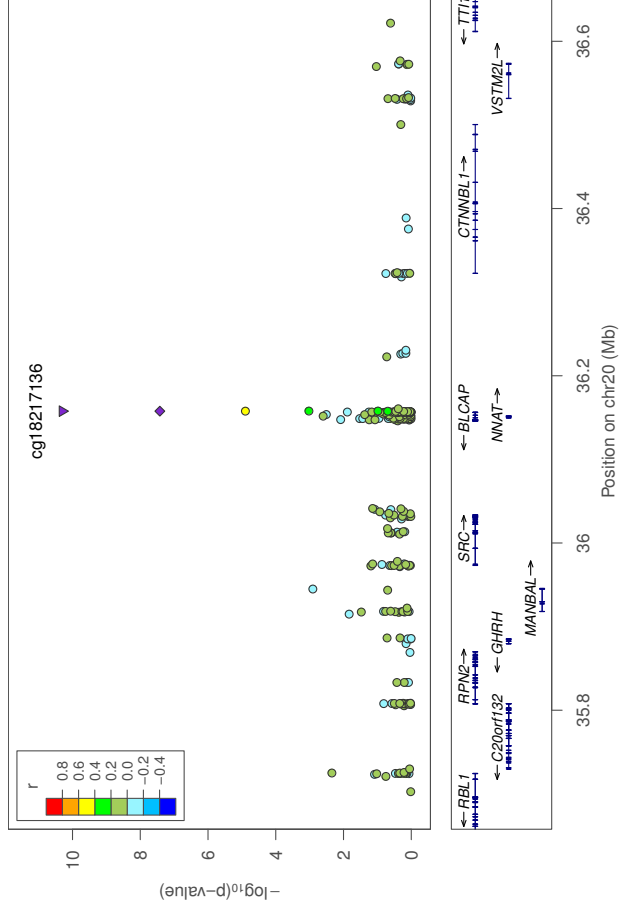

## TOX2

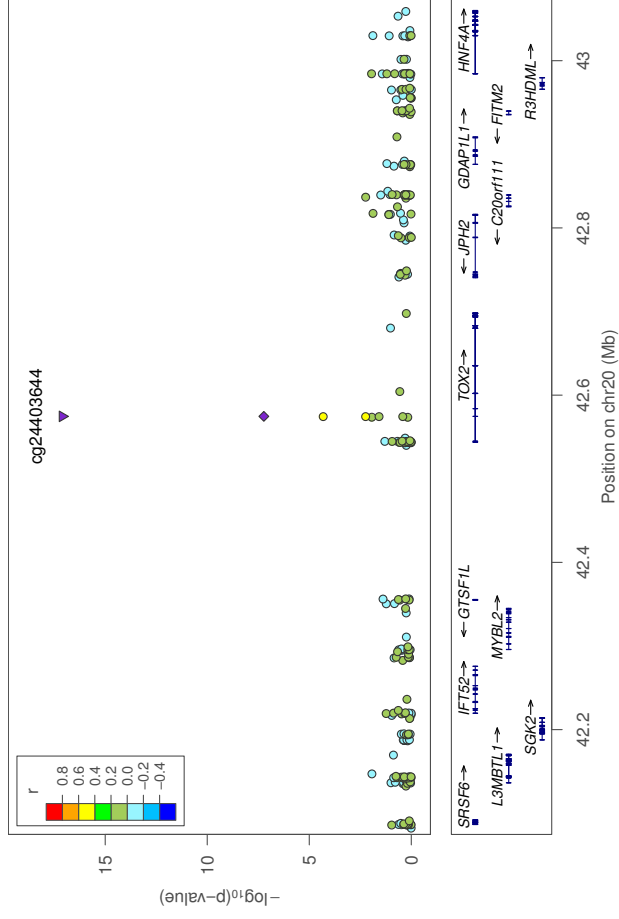

## LINC00649

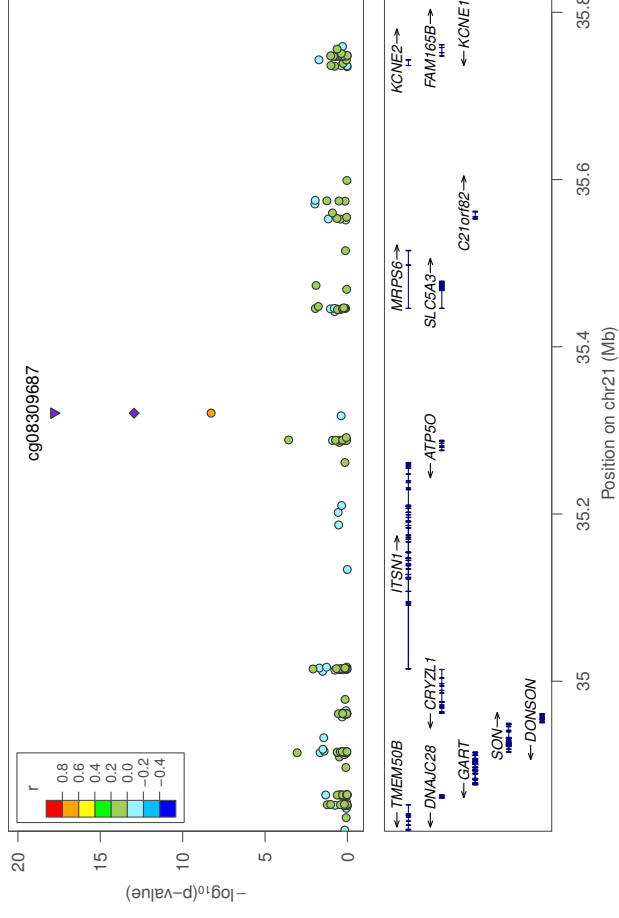

## ABCG1

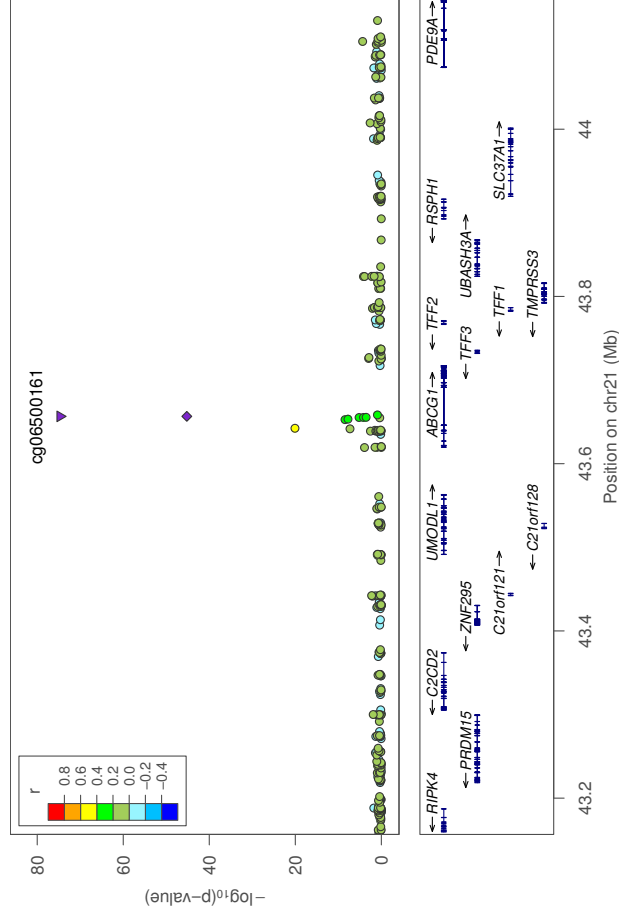

## PIK3IP1

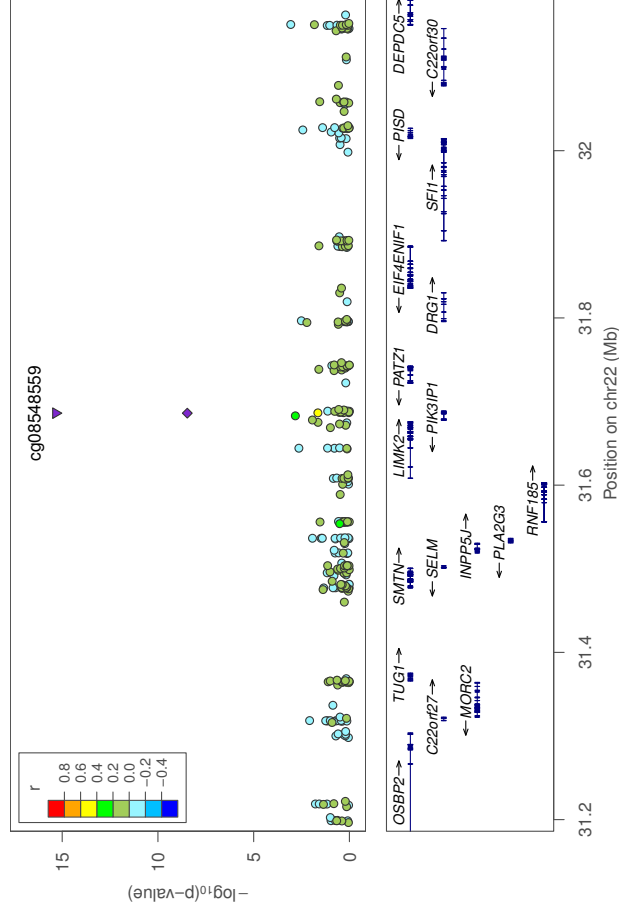

## CARD10

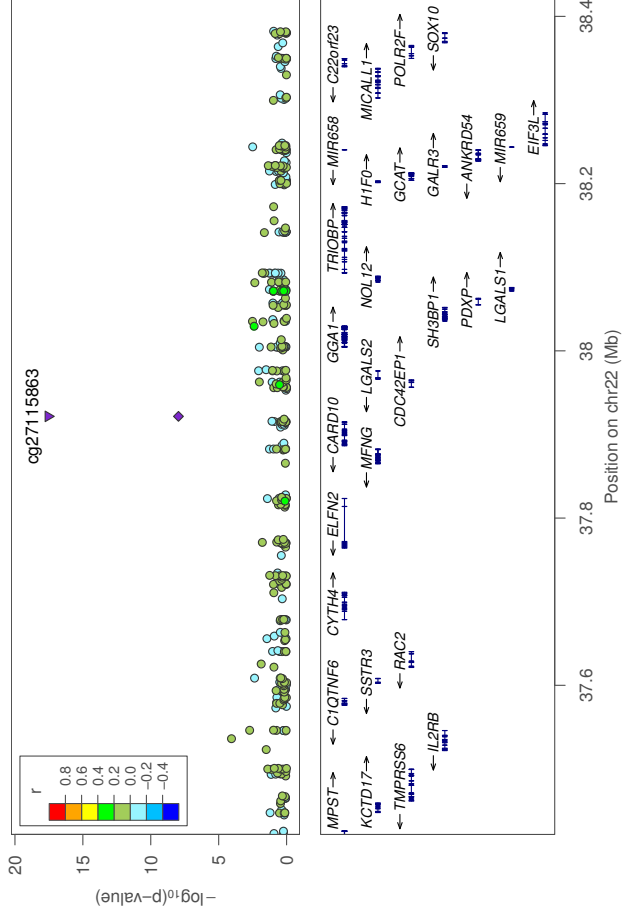

## TAB1

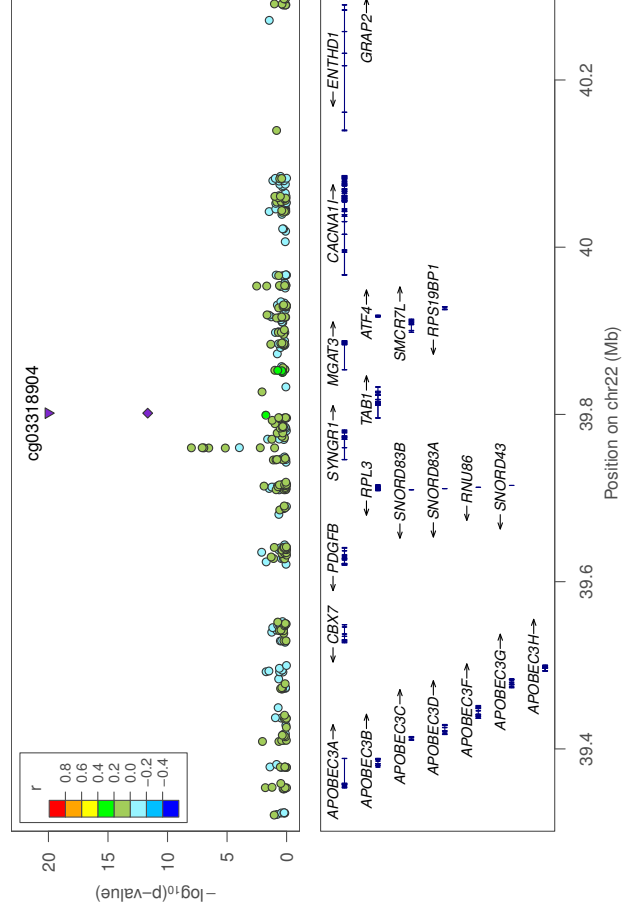

## CRELD2

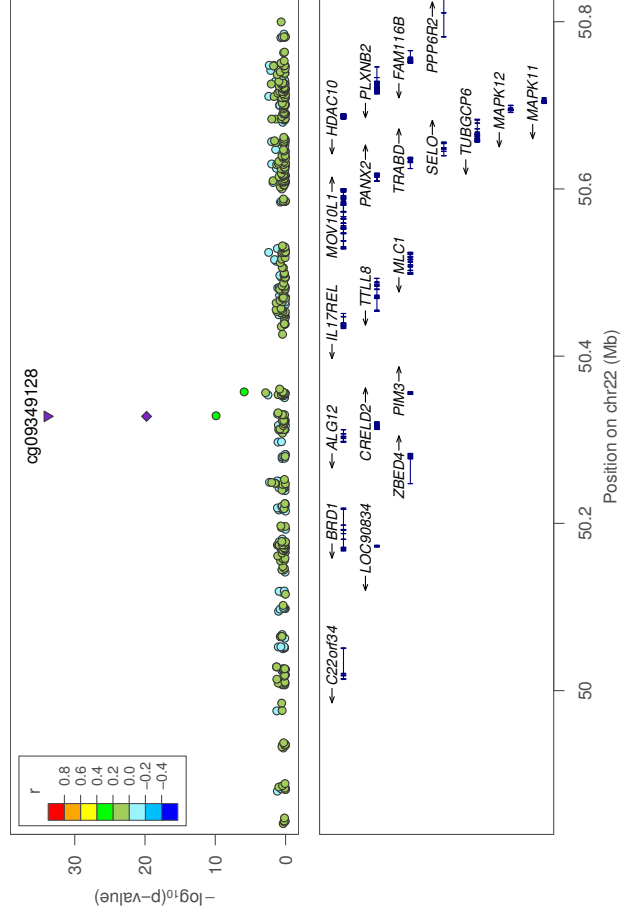

Supplement: NIHMS70428-supplement-Supplementary_Information_Figure_1.pdf [file NIHMS70428-supplement-Supplementary_Information_Figure_1.pdf]
