# Supplementary material
Source: PubMed Central journal article supplement (PMC5570525)

## Supplementary Information Figure 2

### SDF4

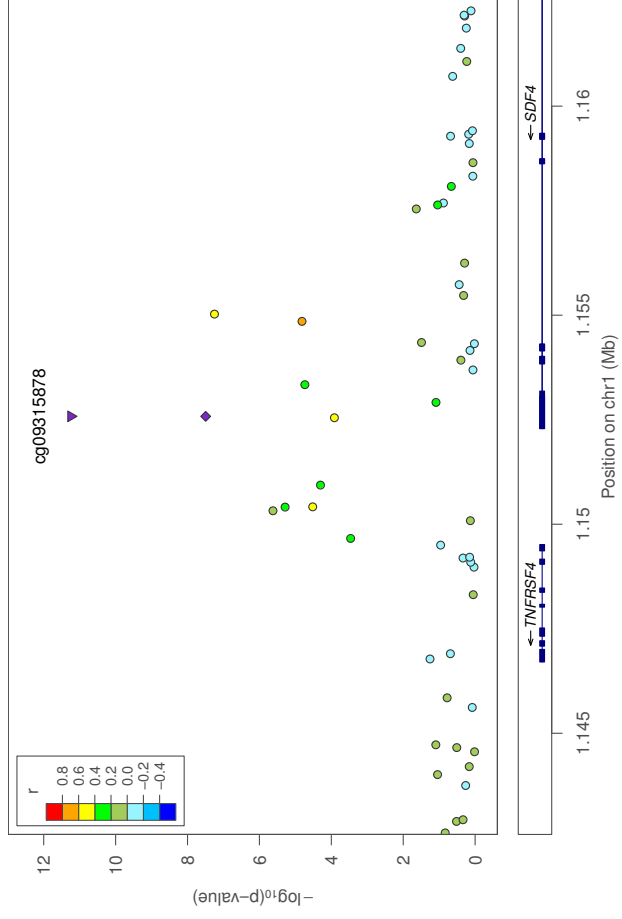

### WRAP73

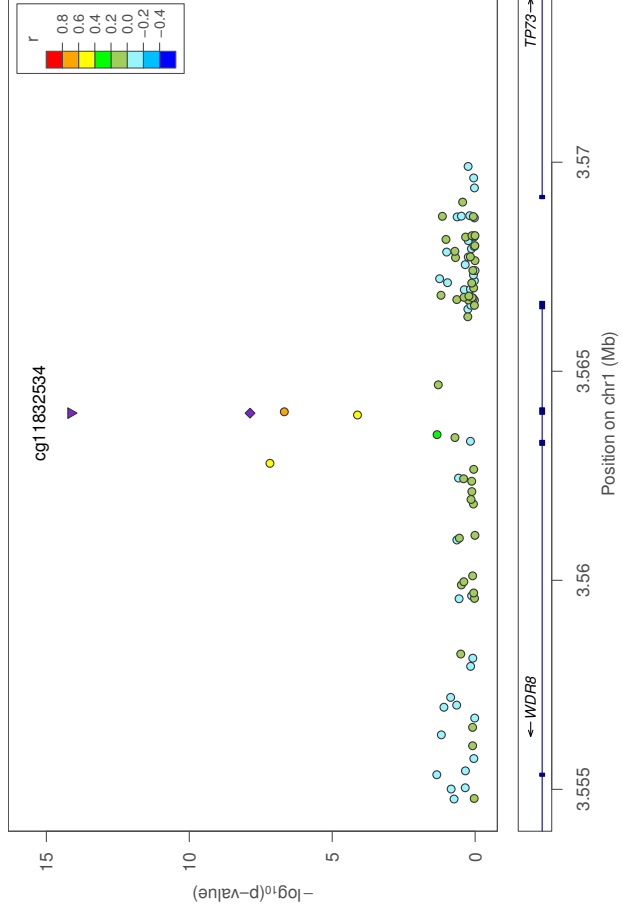

### C1orf127

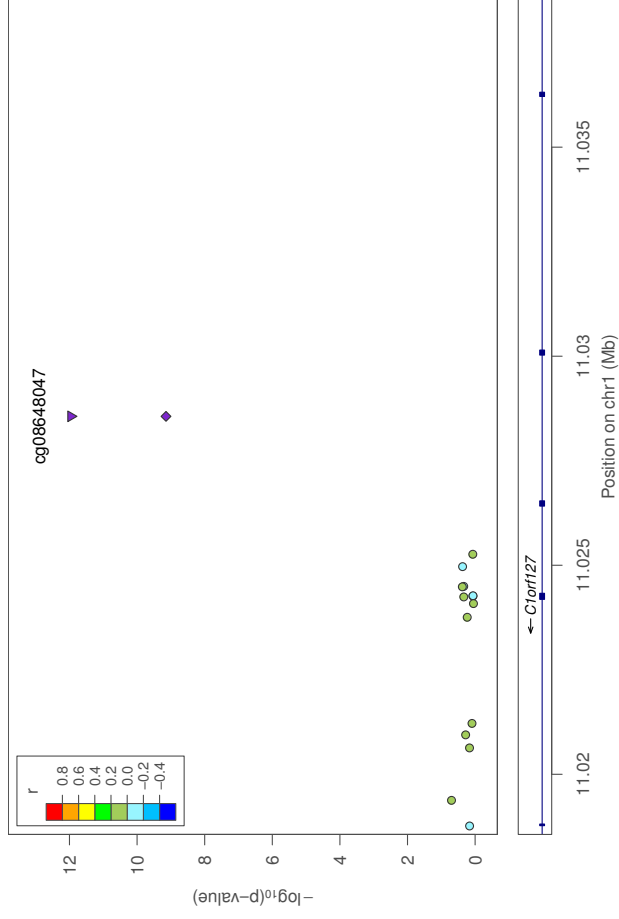

### SPATA21

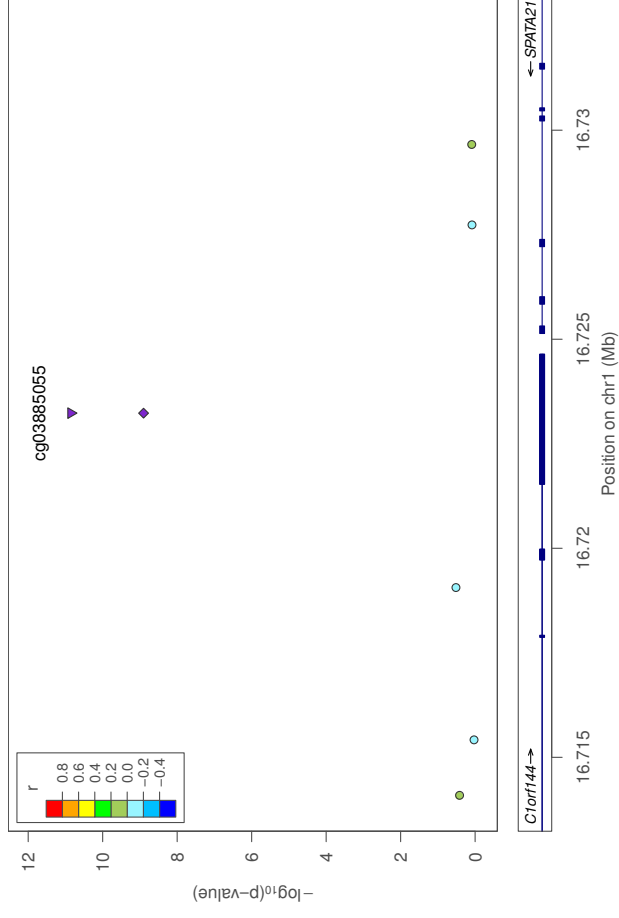

# AHDC1

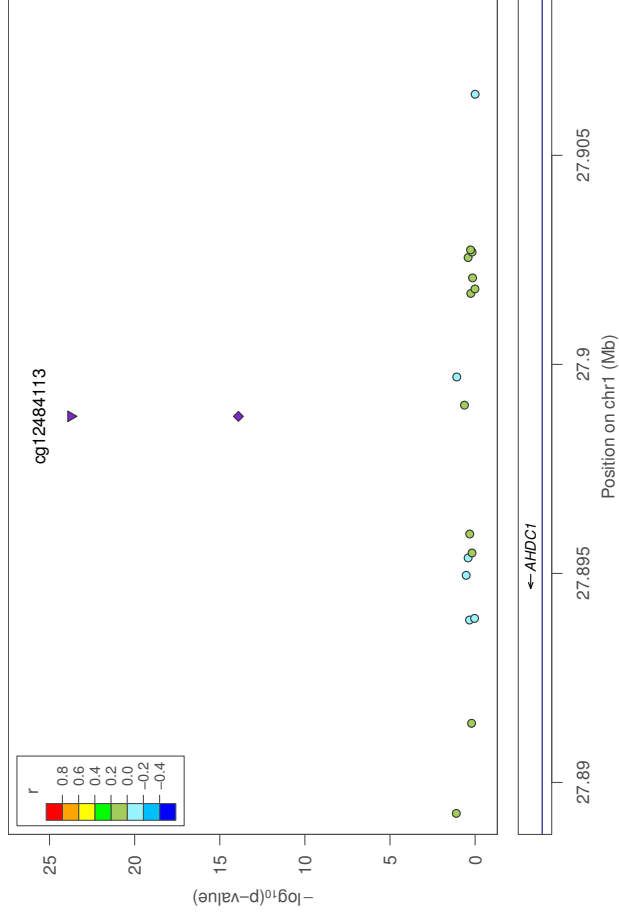

# KIAA0319L

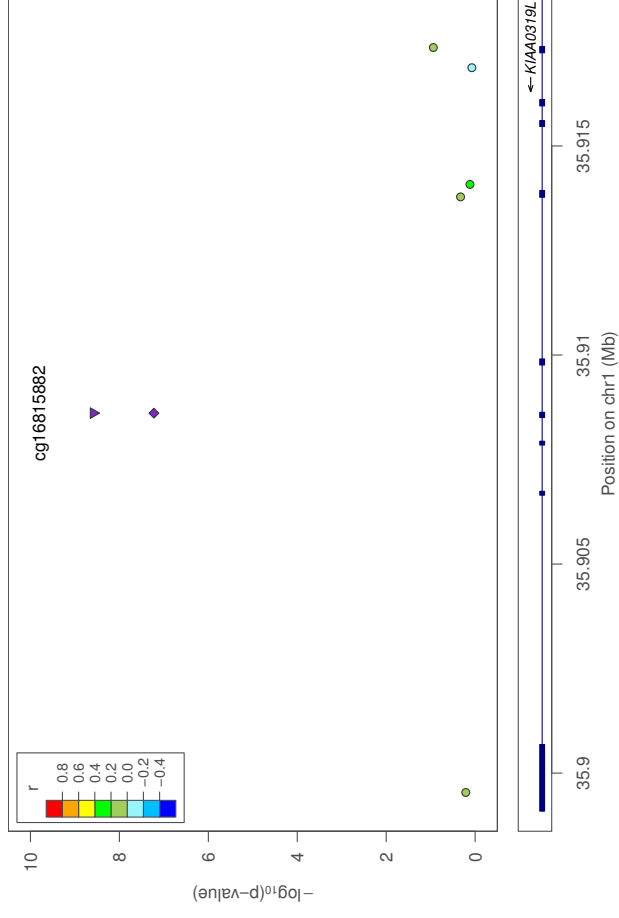

# STK40

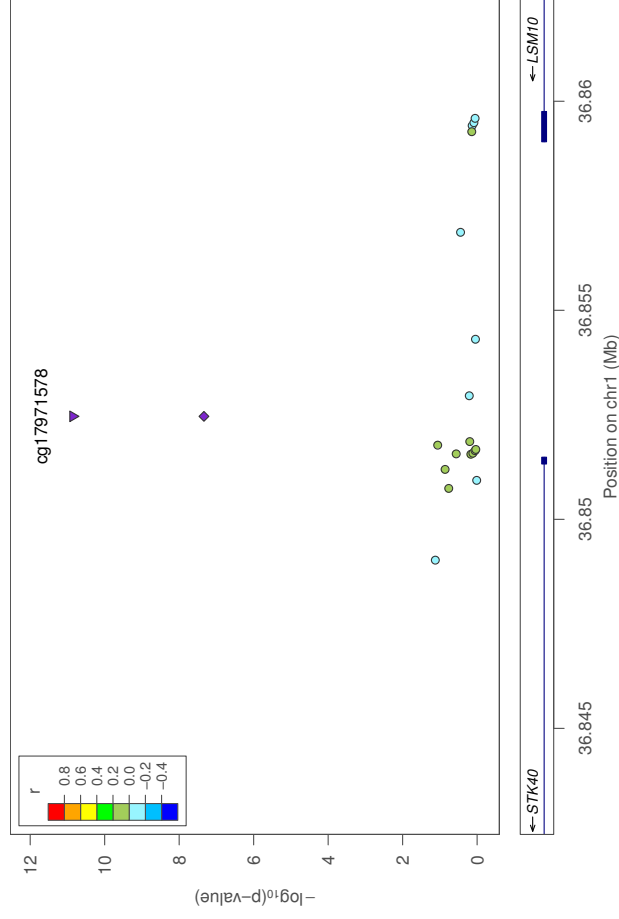

# TIE1

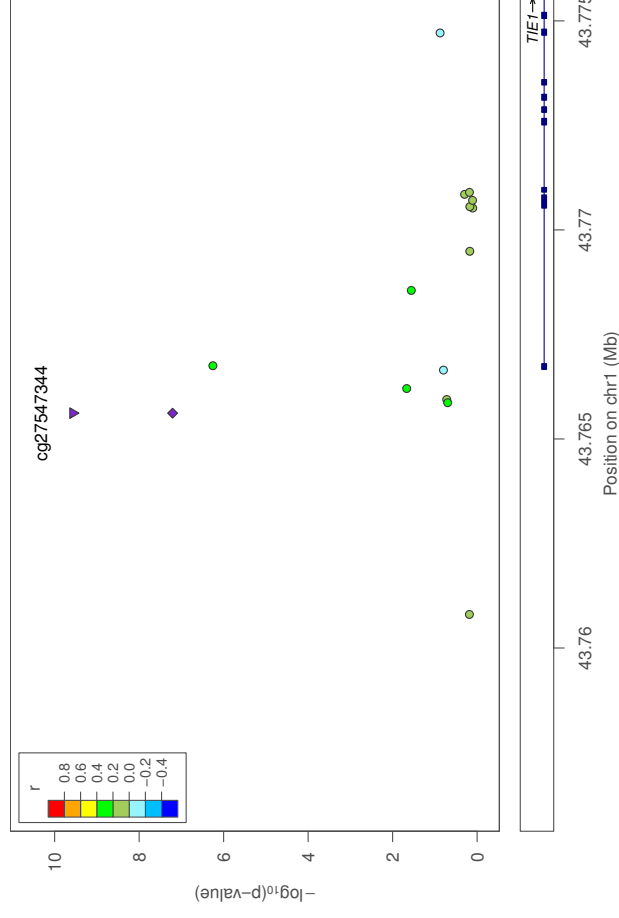

### DHCR24

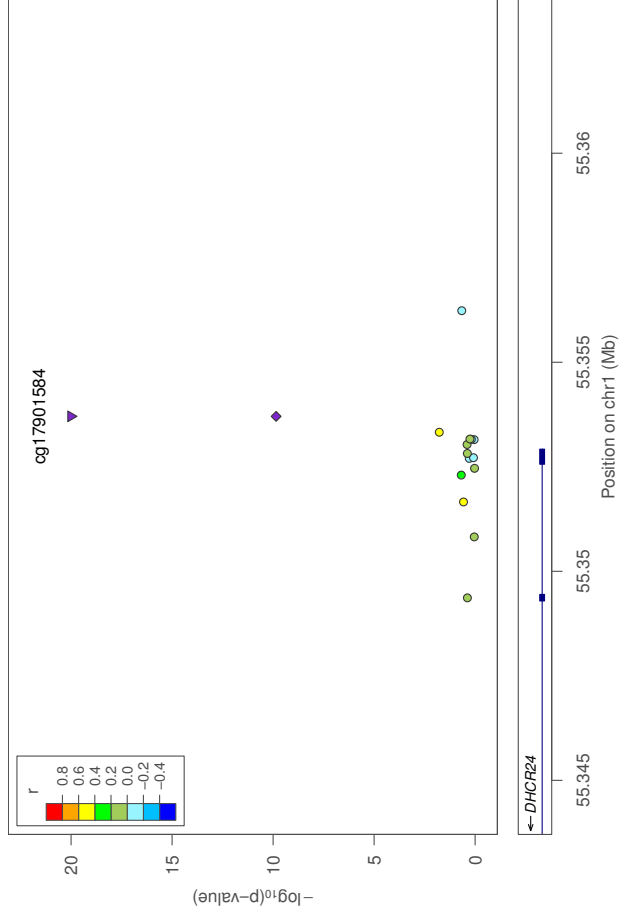

### PHBP3

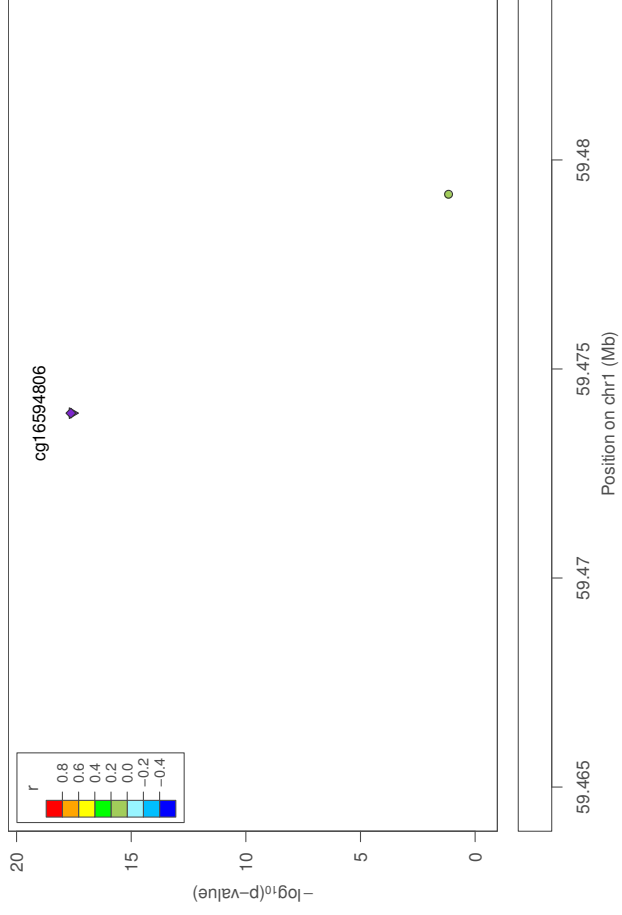

### NFIA

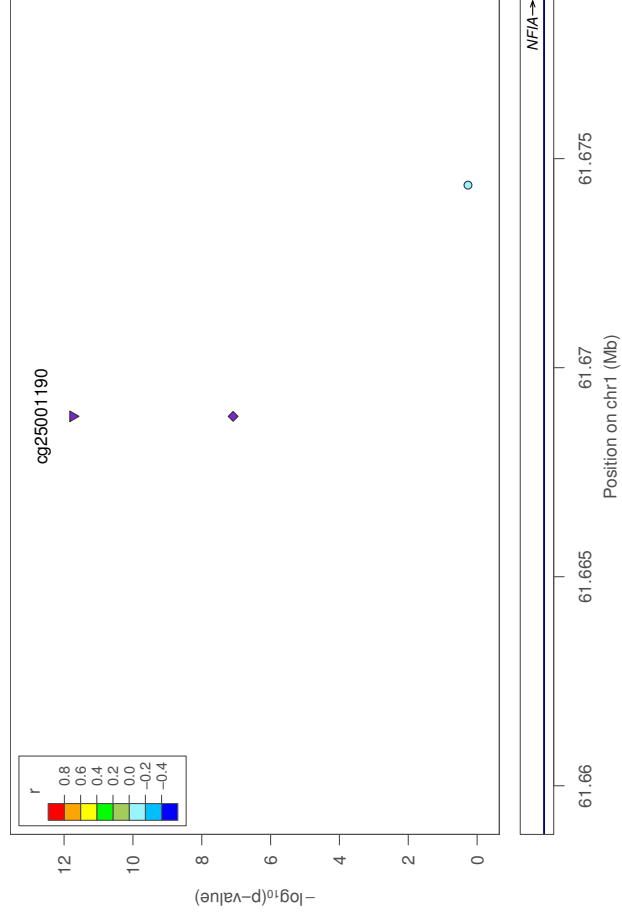

### S1PR1

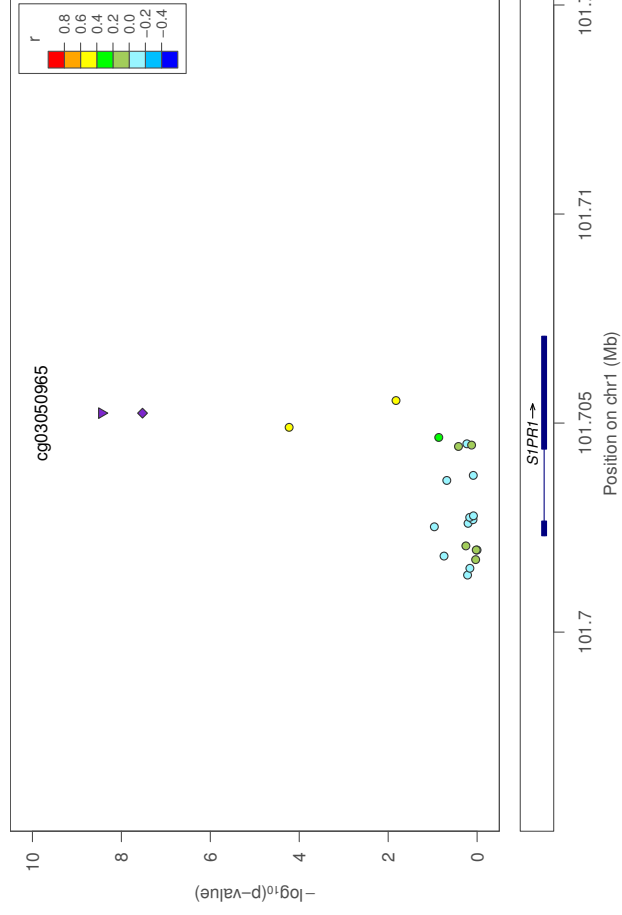

# SARS

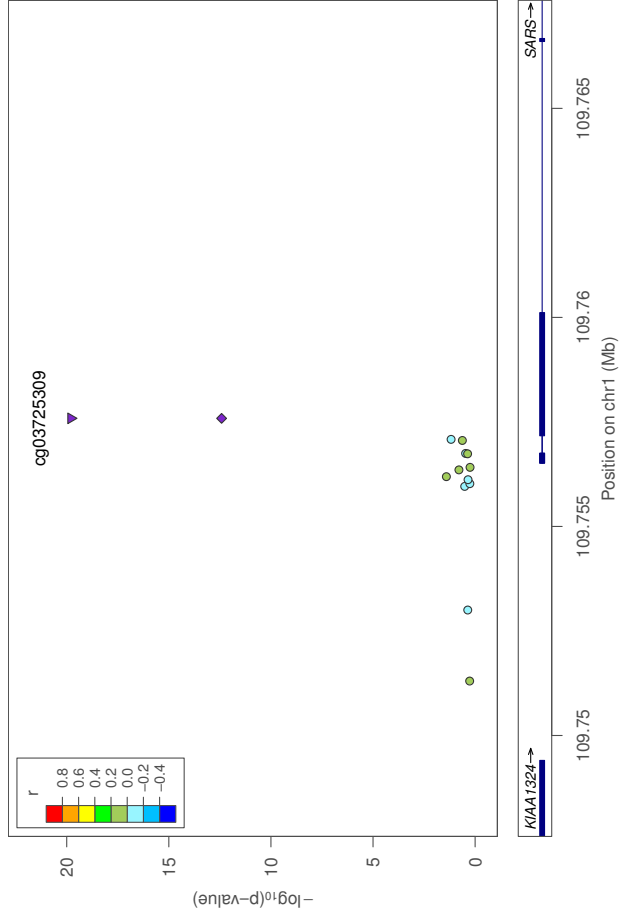

# PHGDH

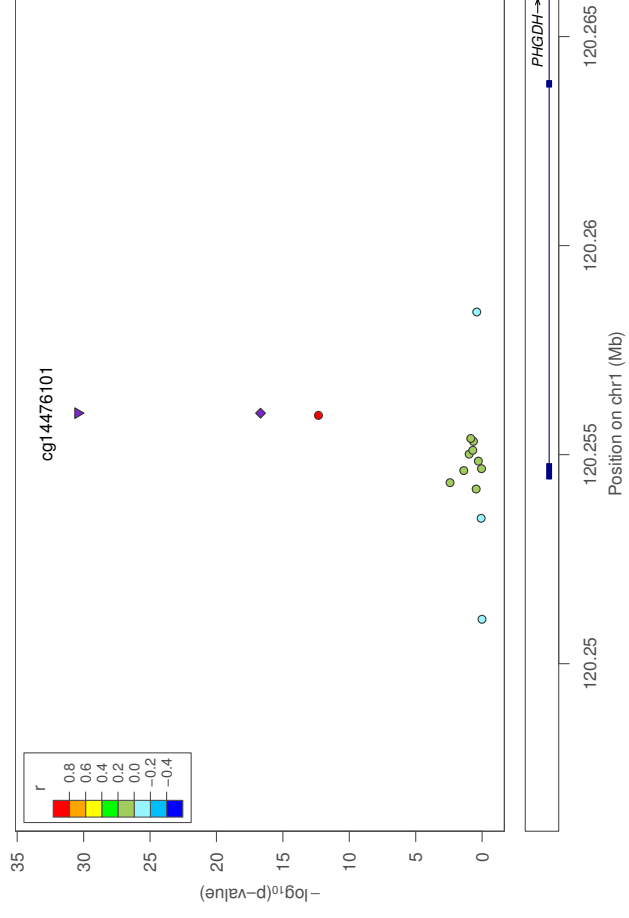

# PDE4DIP

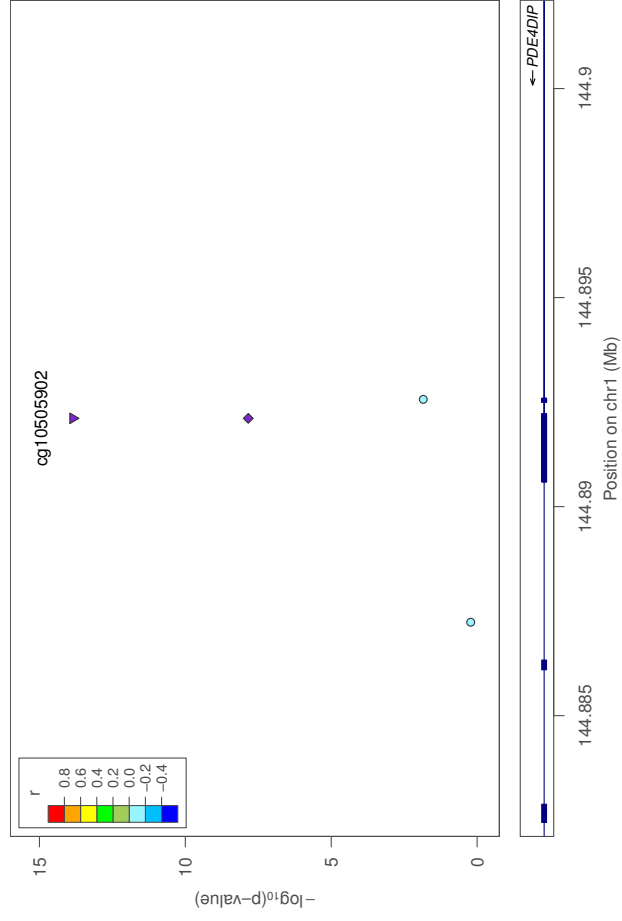

# S100A2

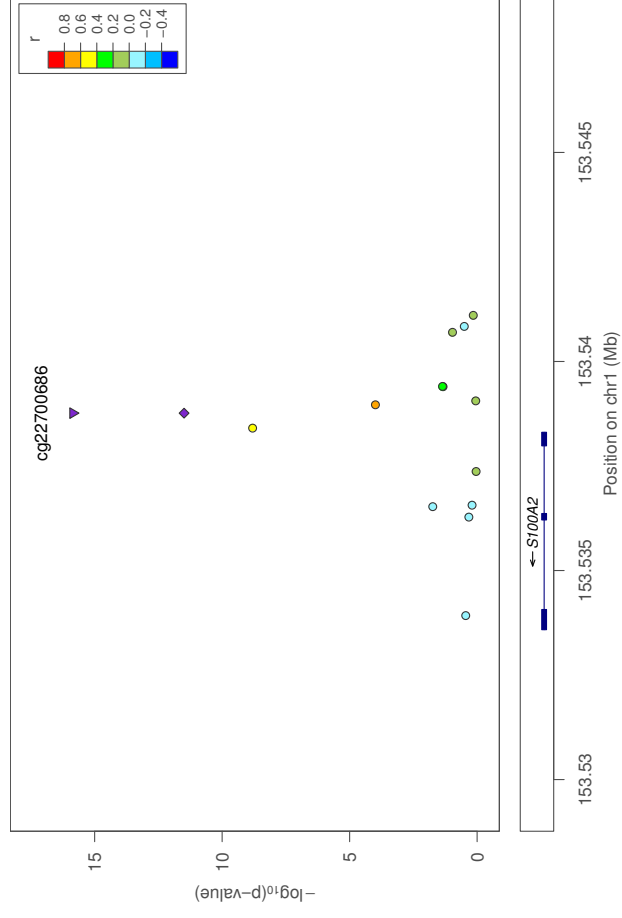

### LMNA

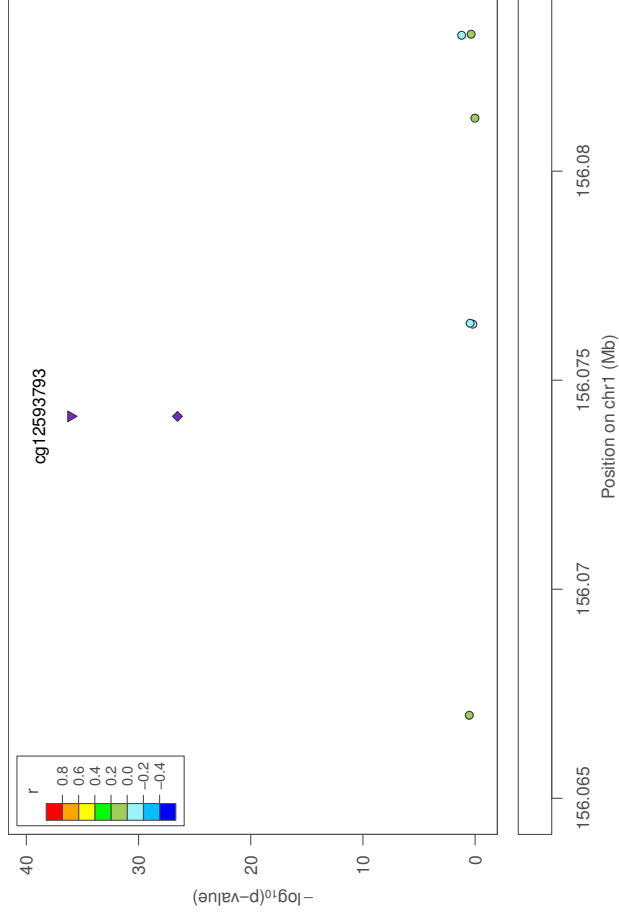

### BCAN

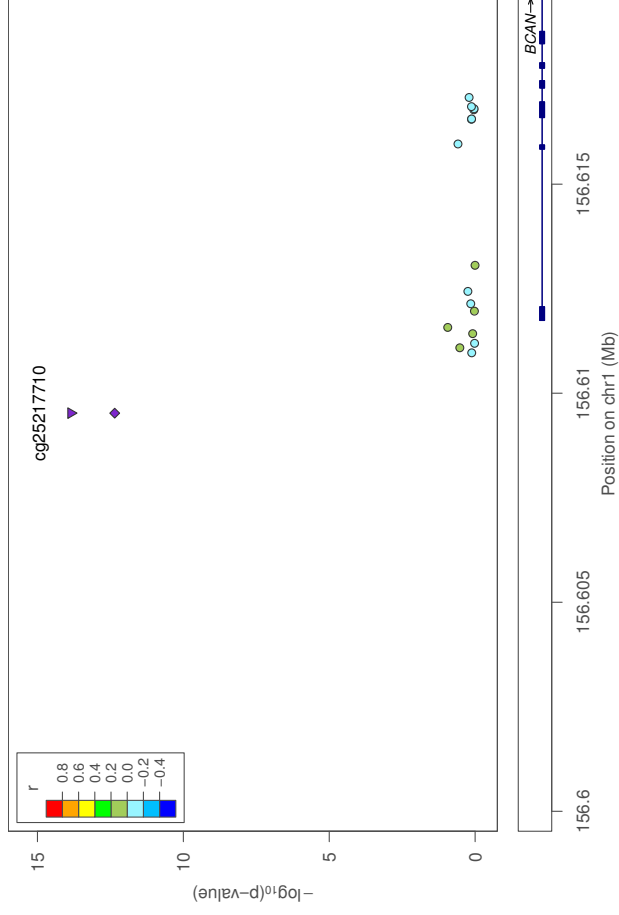

### DARC

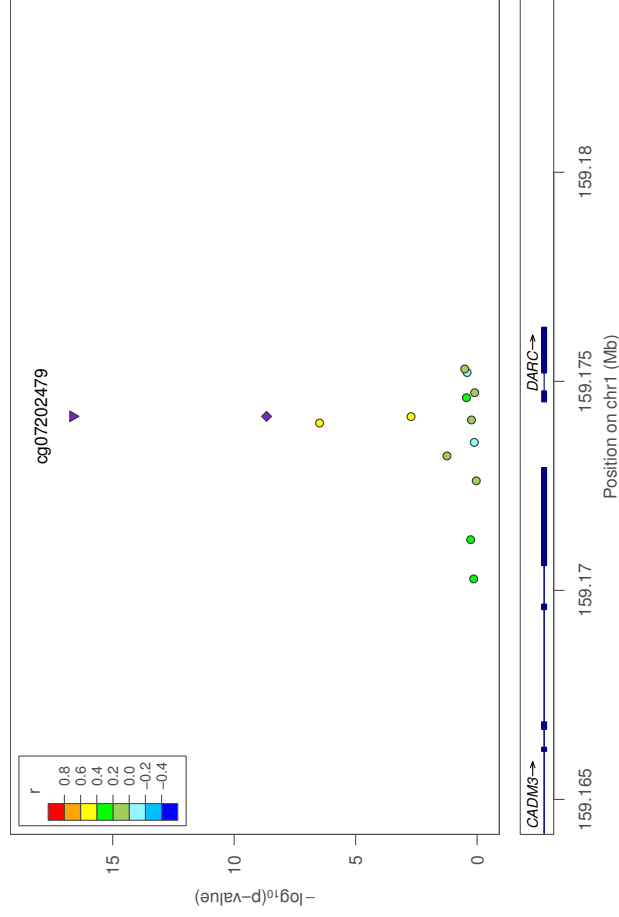

### CD247

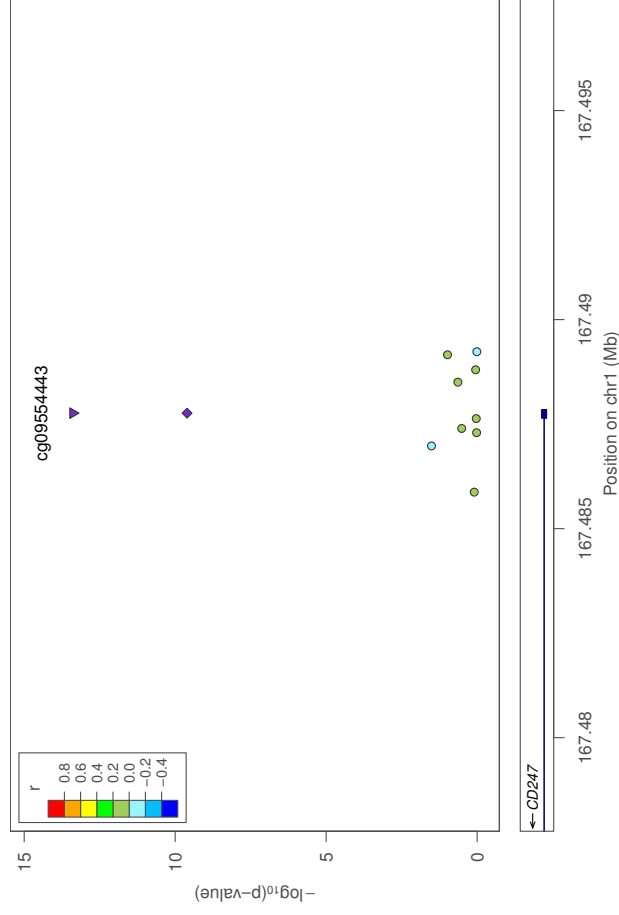

# RPS10P7

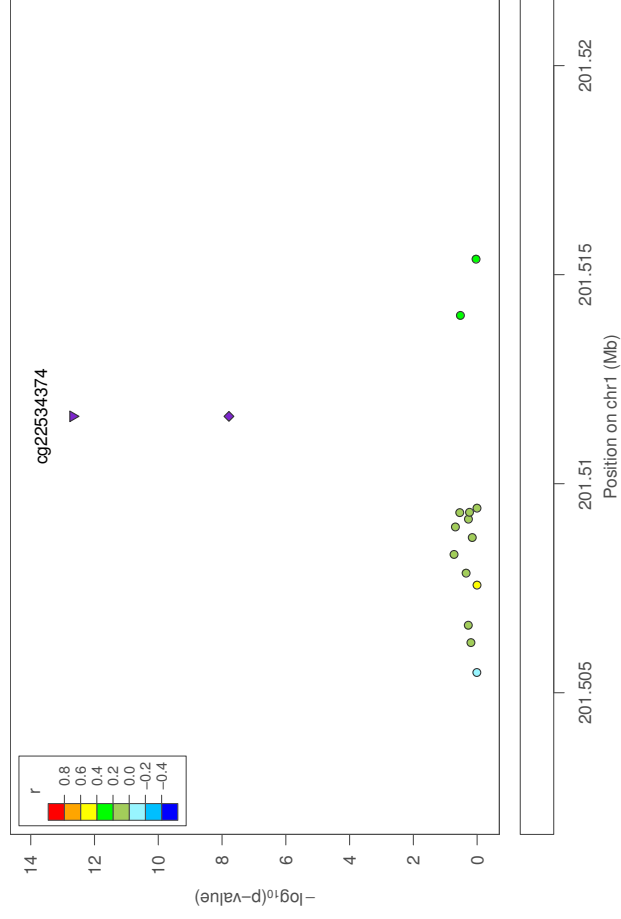

# SLC41A1

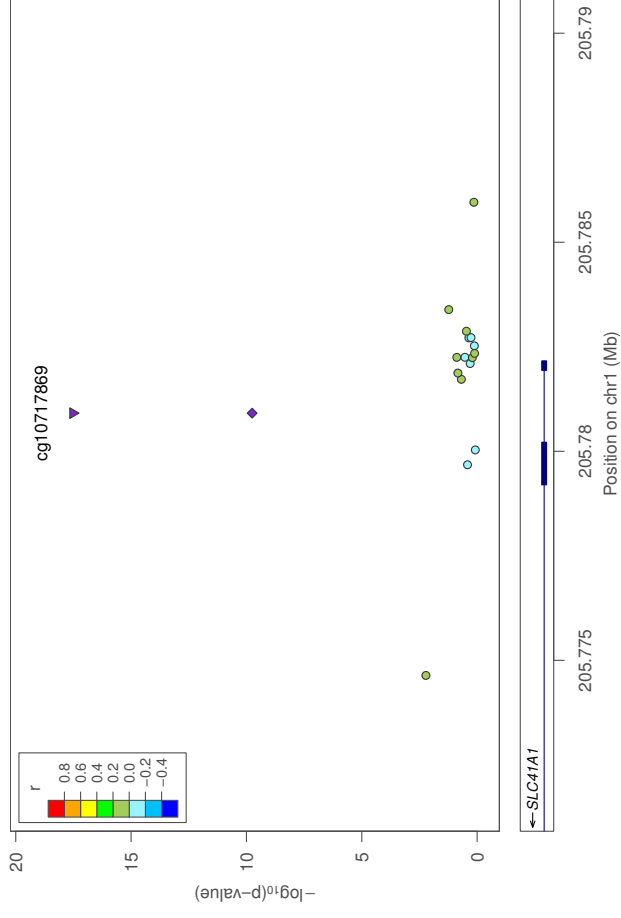

# TMEM63A

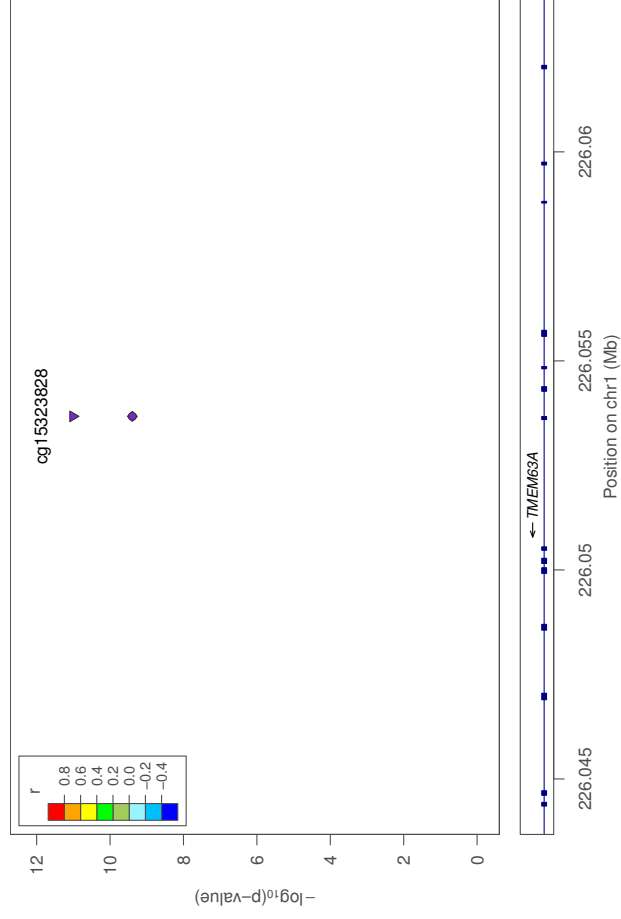

# LINC00184

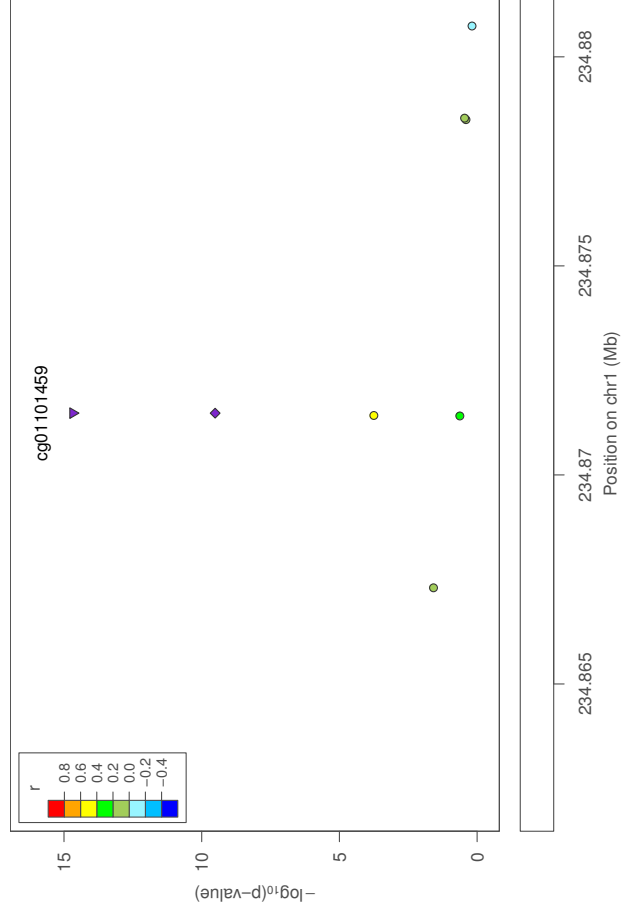

# LPIN1

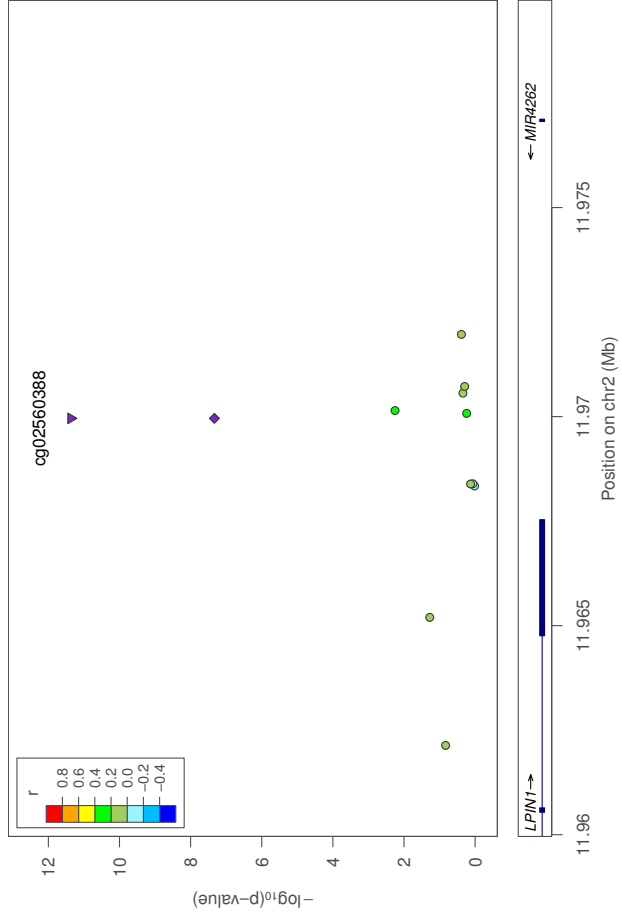

# RNA5SP89

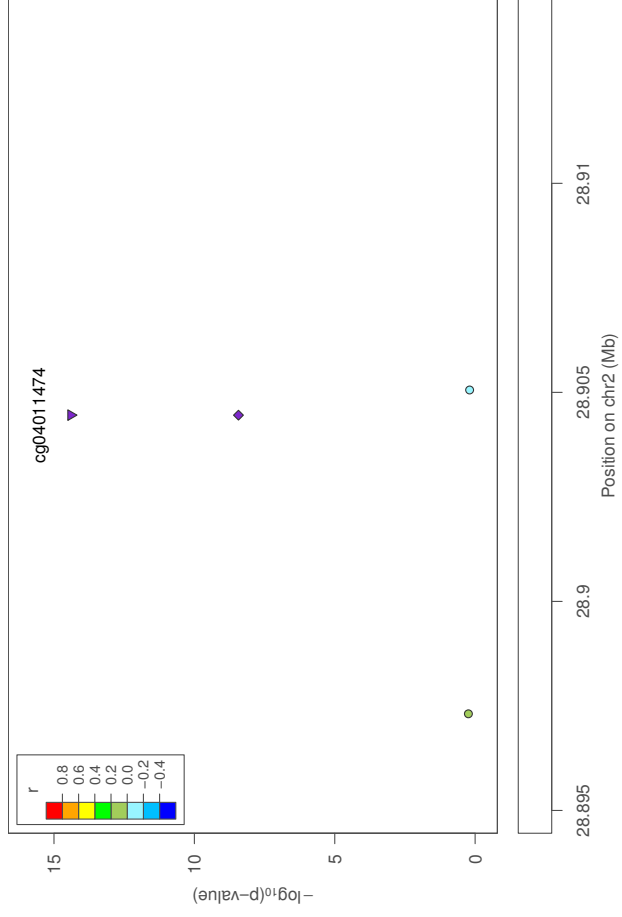

# LBH

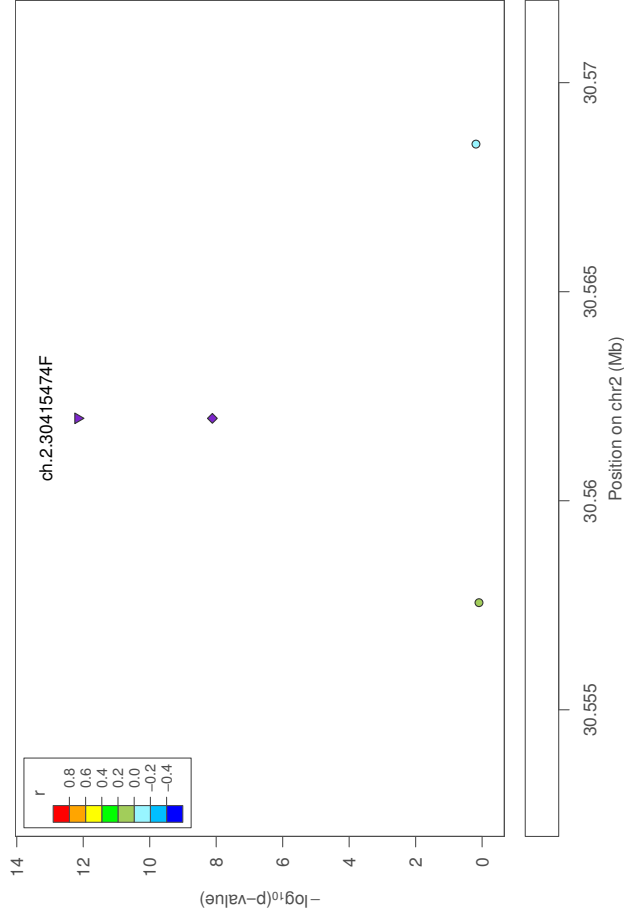

# CDC42EP3

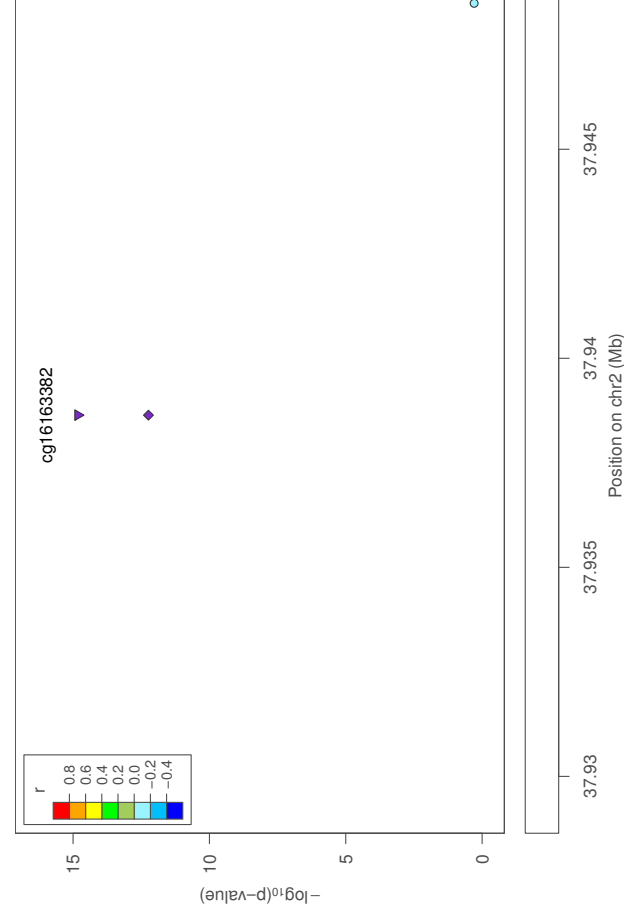



# TGFA

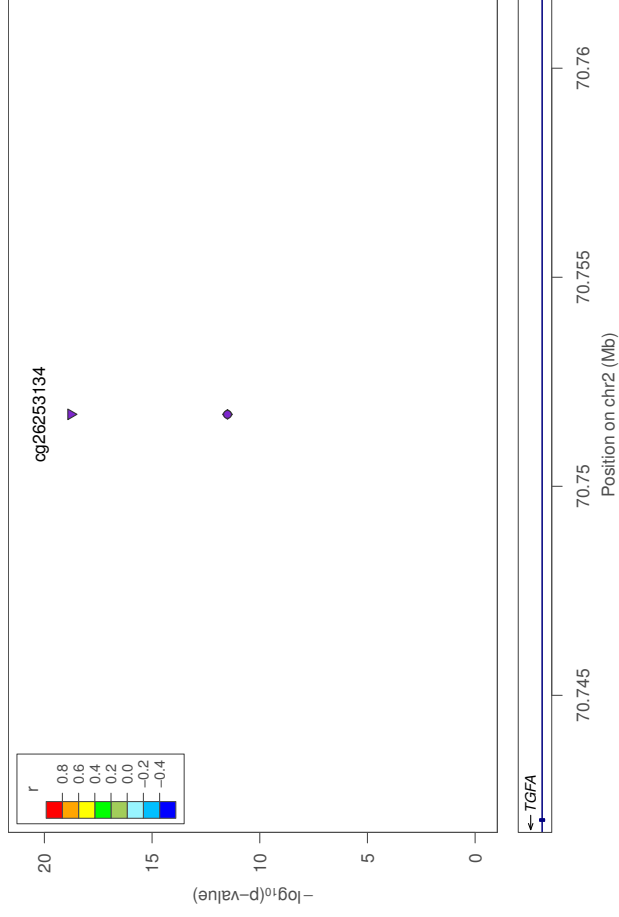

# SULT1C2

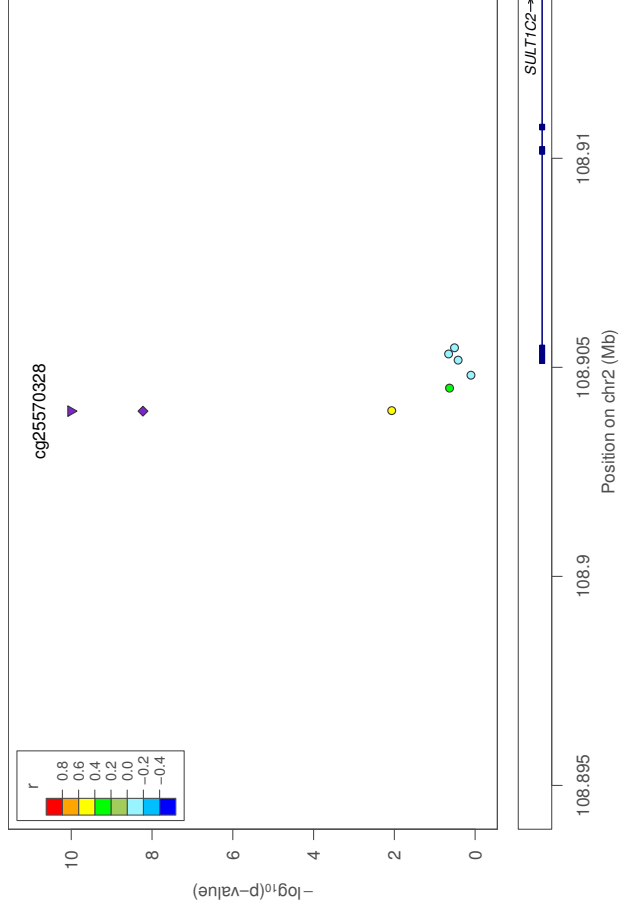

# MAP3K2

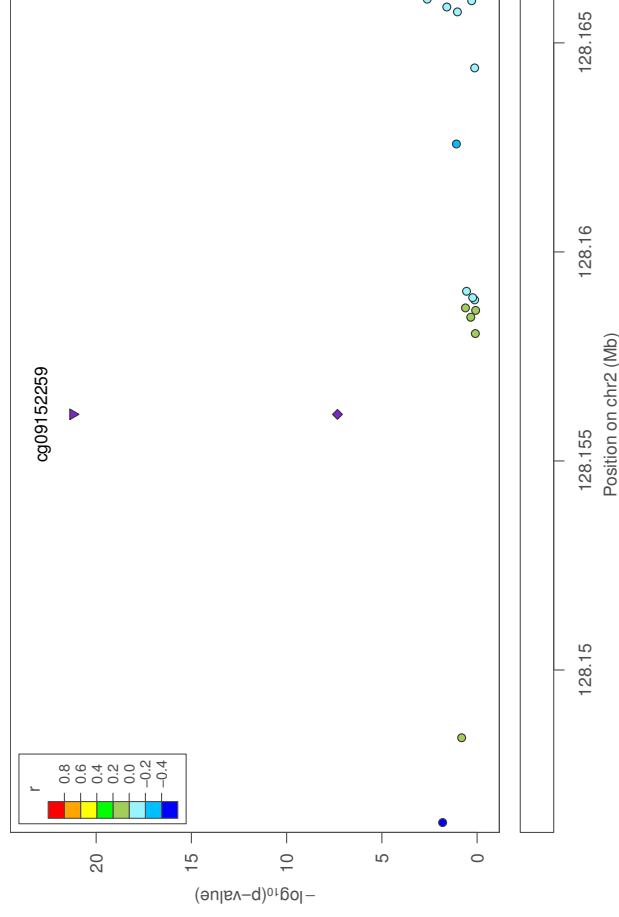

# UGGT1

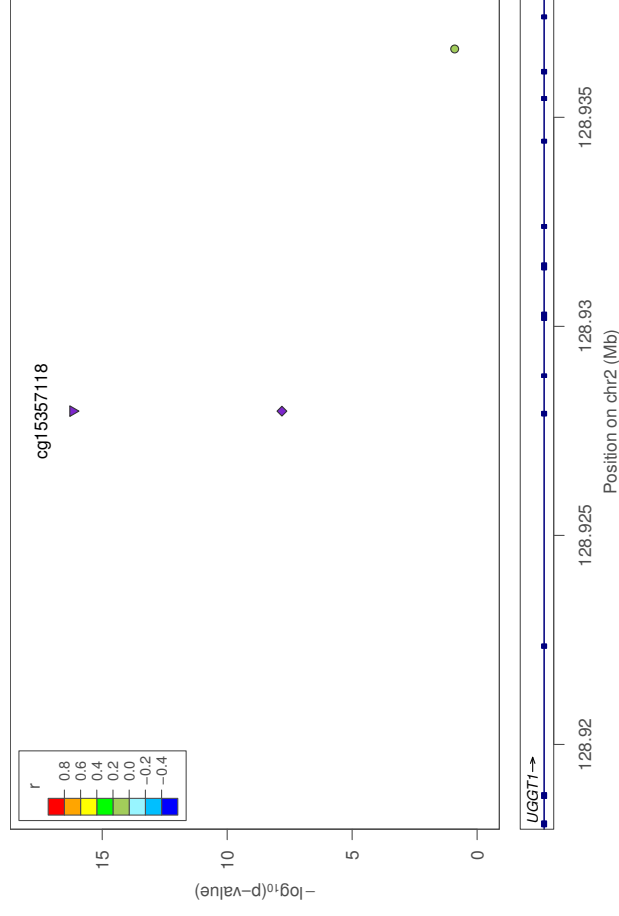

## ZEB2

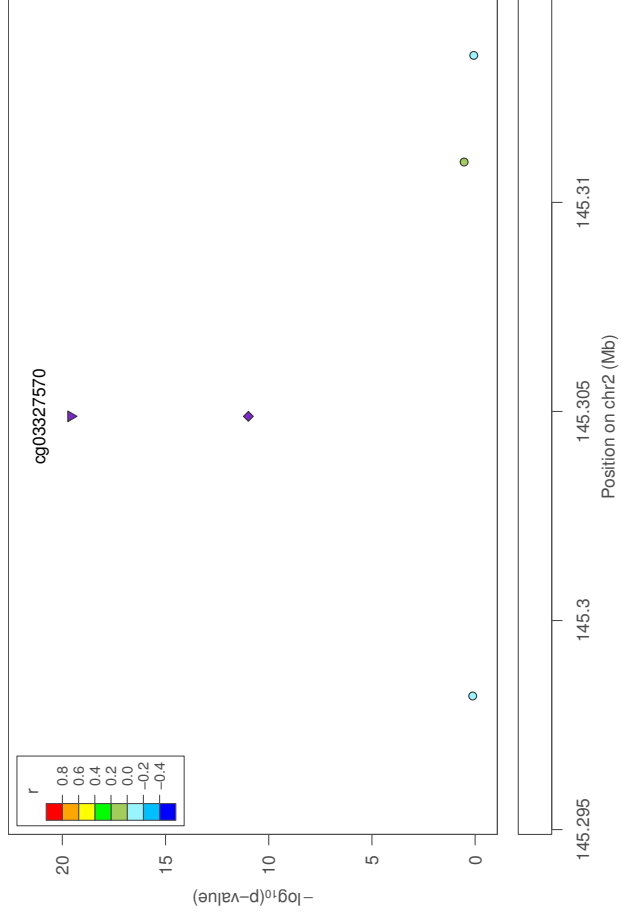

## NFE2L2

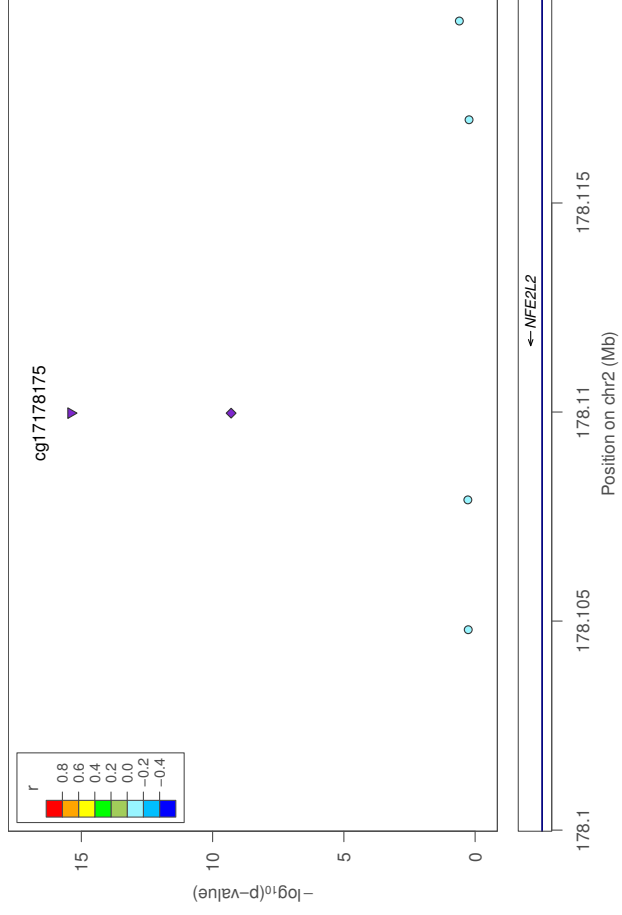

## FTH1P20

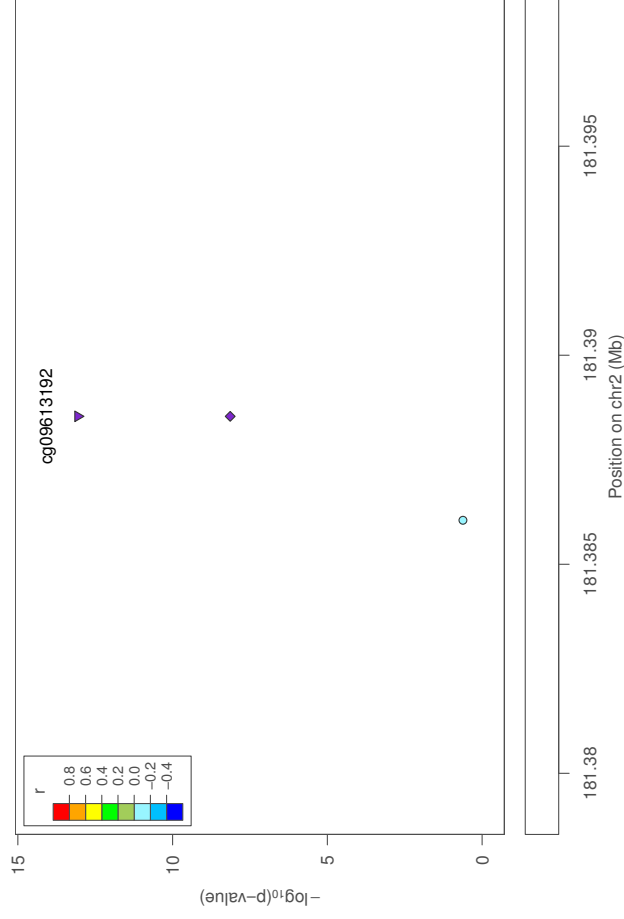

## CRYGFP

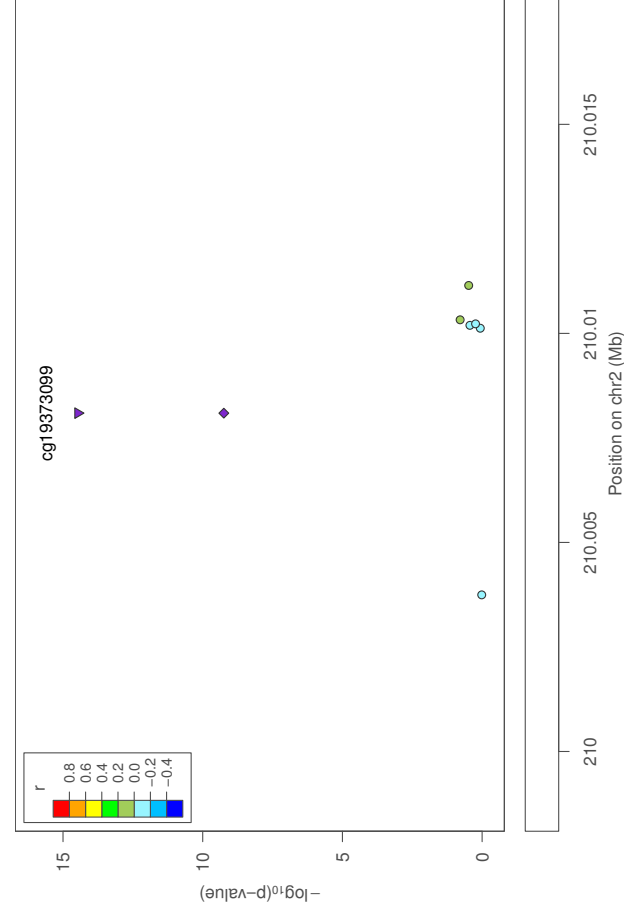

# SLC11A1

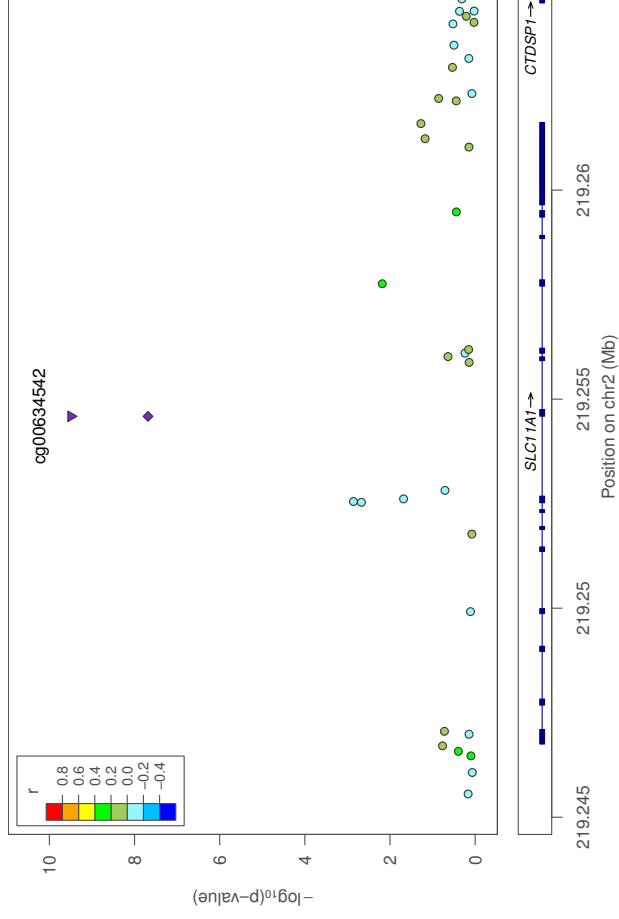

# HDAC4

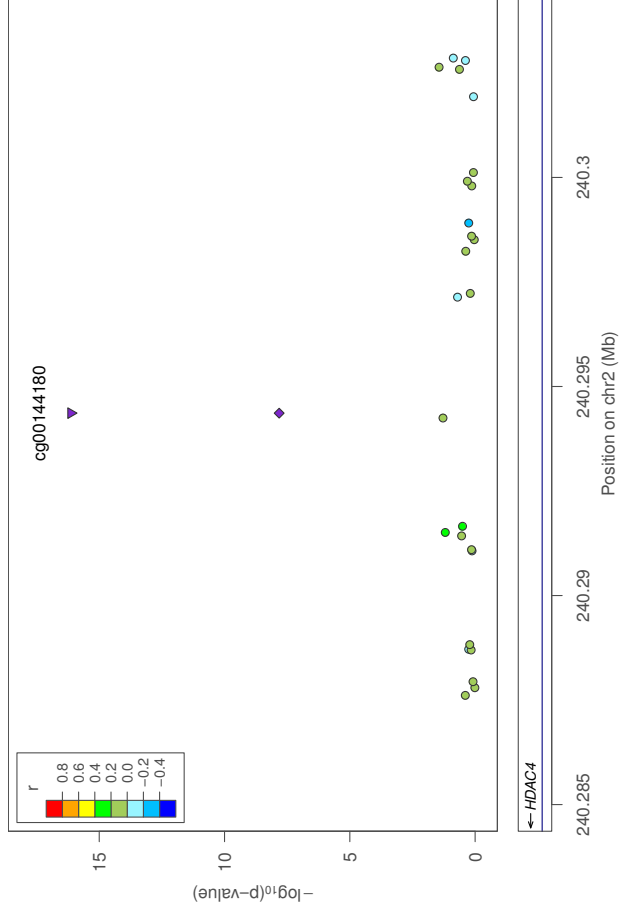

# IL5RA

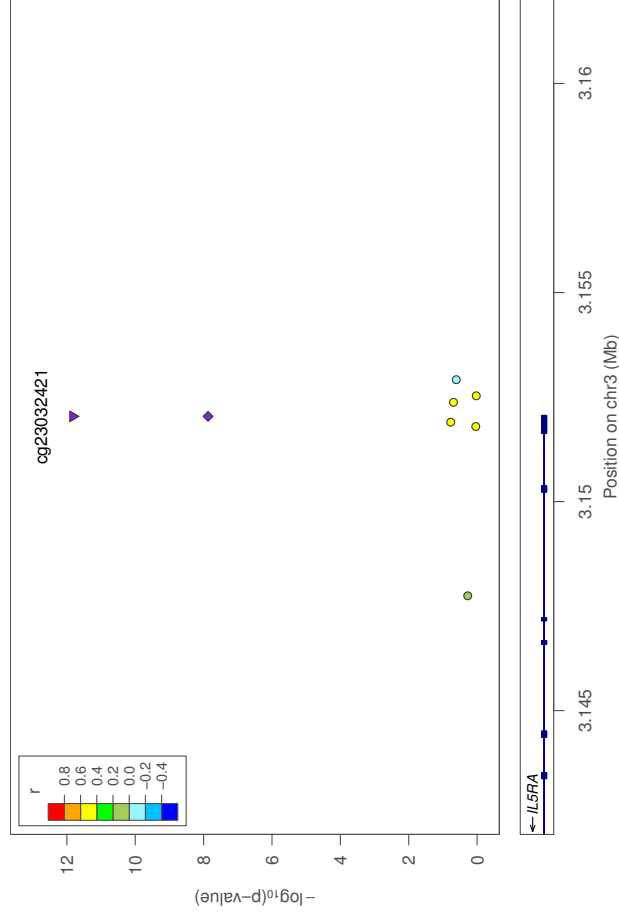

# DLEC1

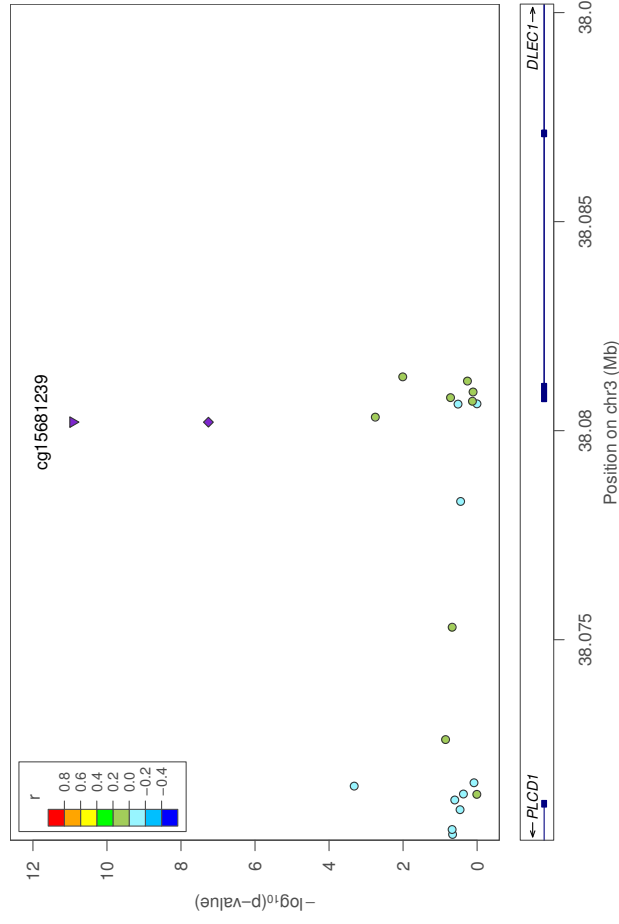

# KLHL18

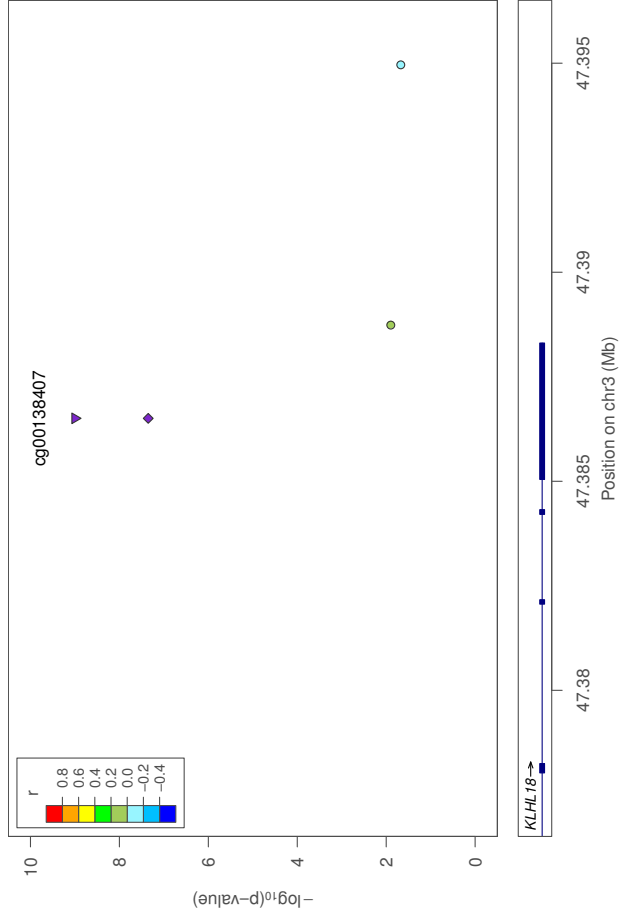

# NT5DC2

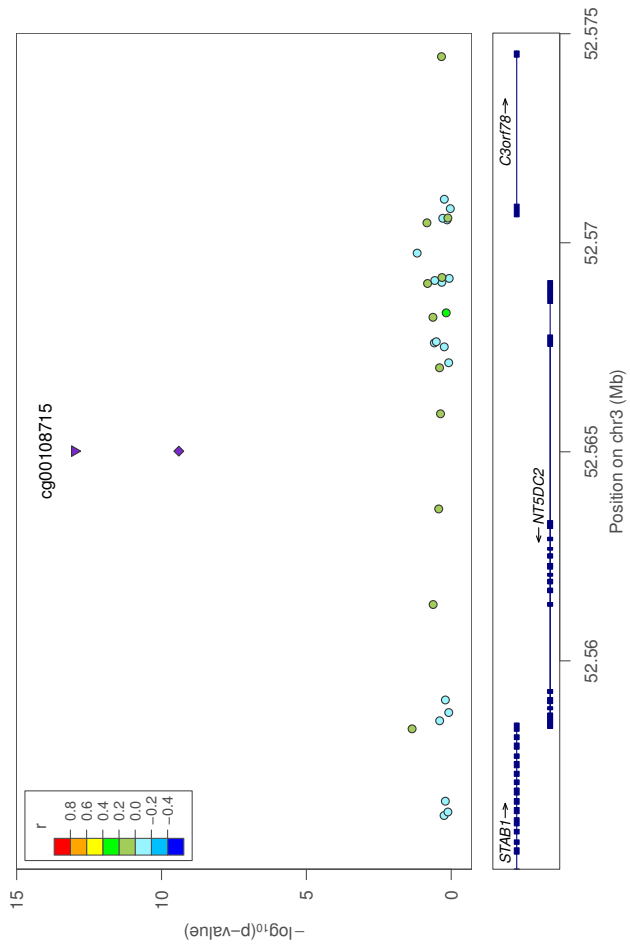

# ACO2

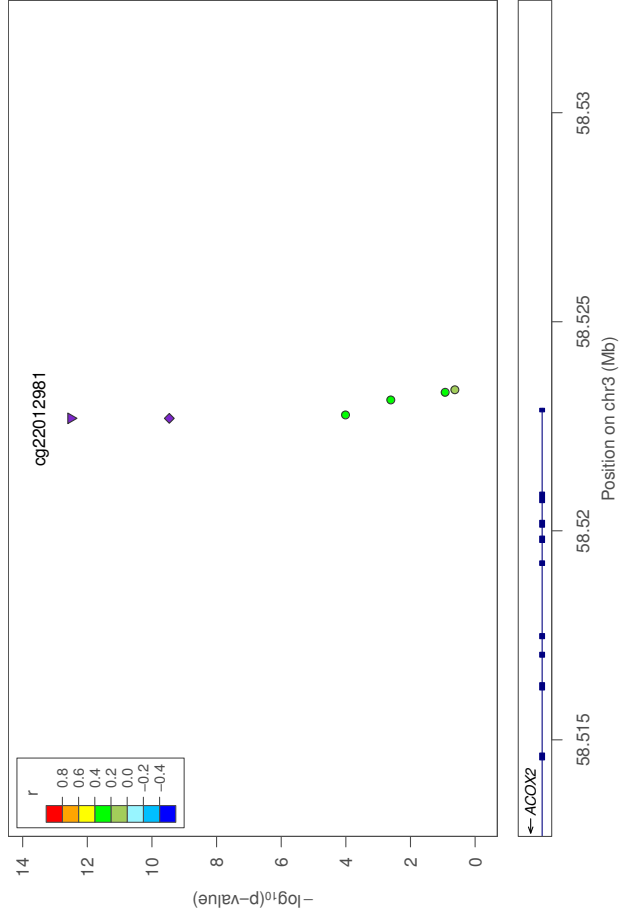

# PRICKLE2

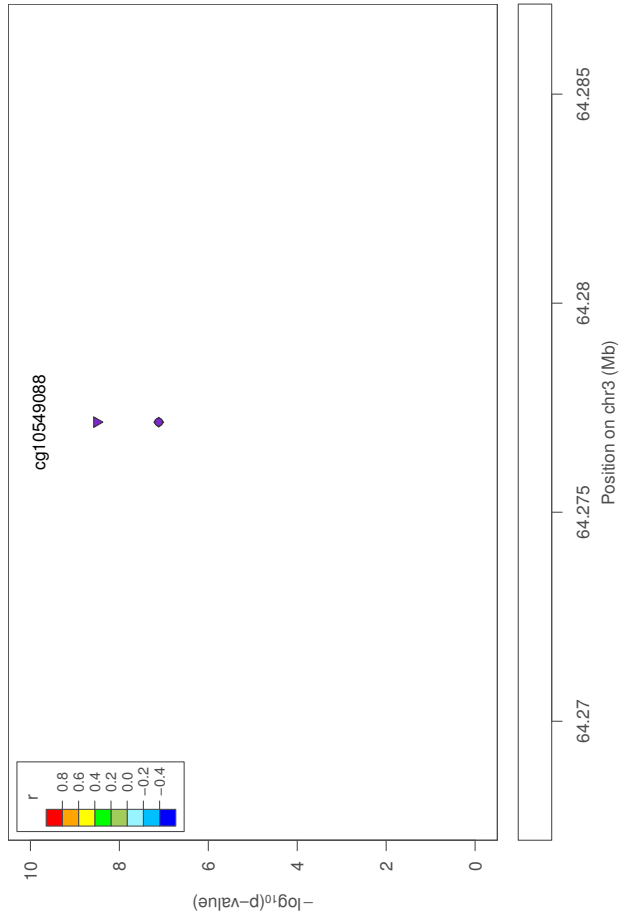

### ZPLD1

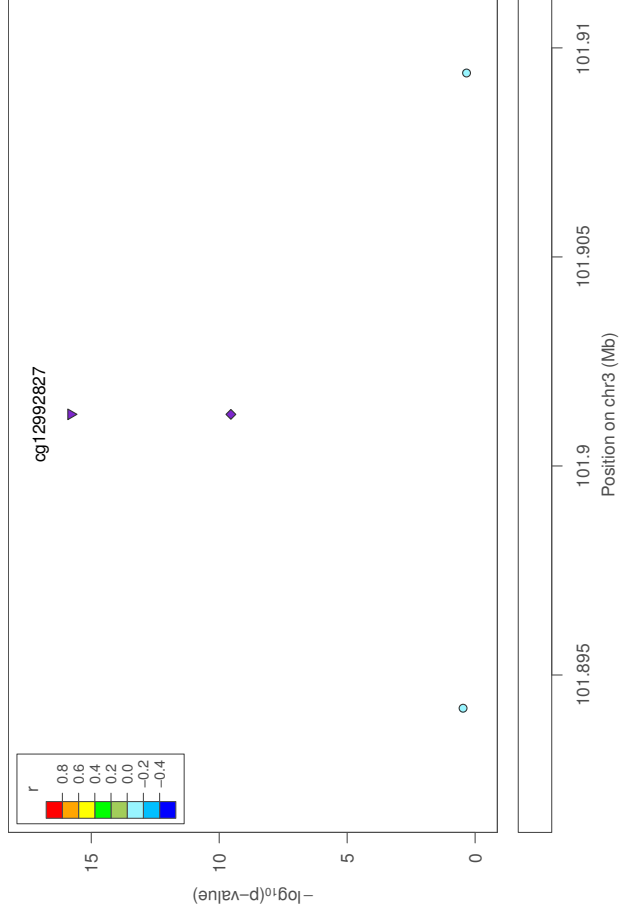

### EAF2

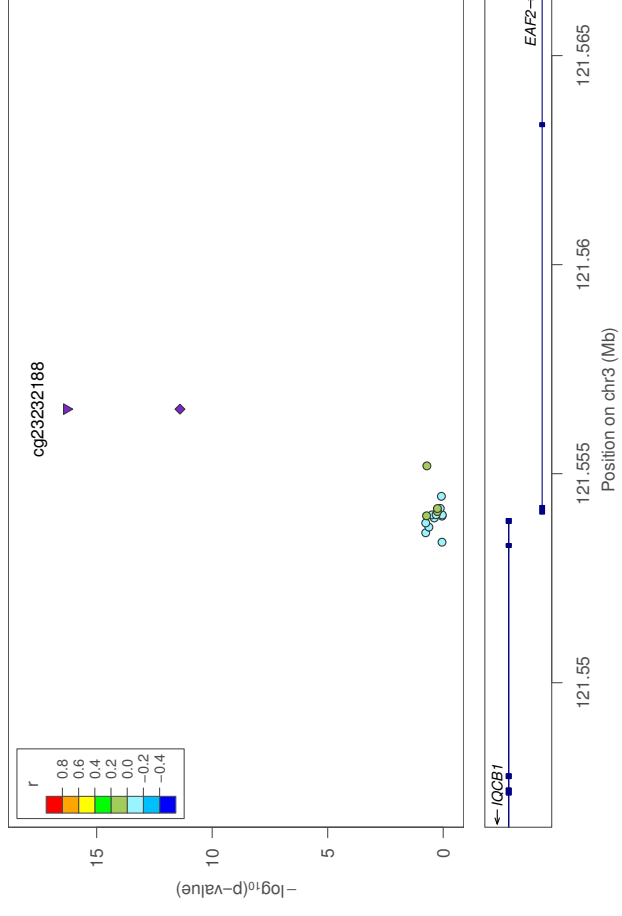

### EEFSEC

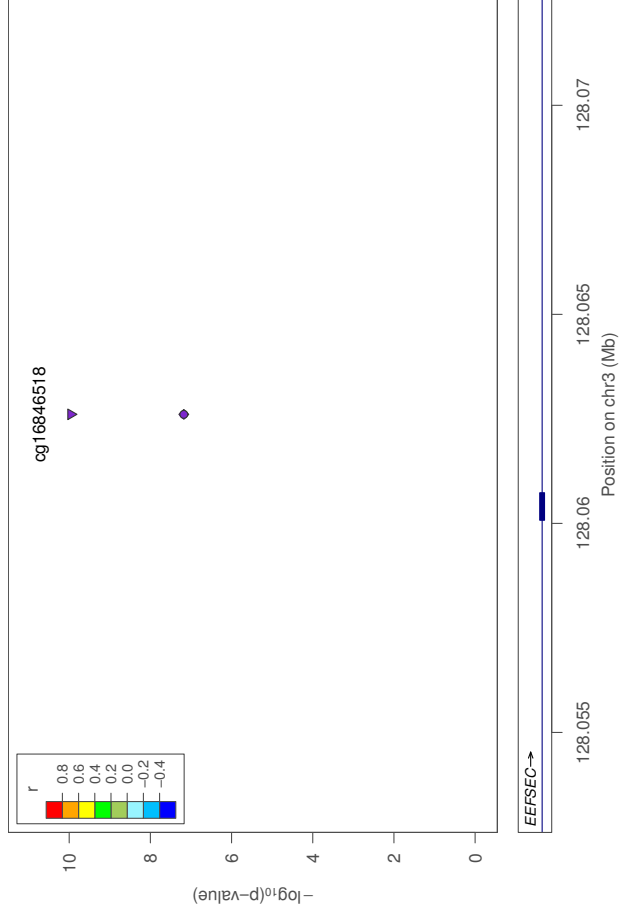

### EFCC1

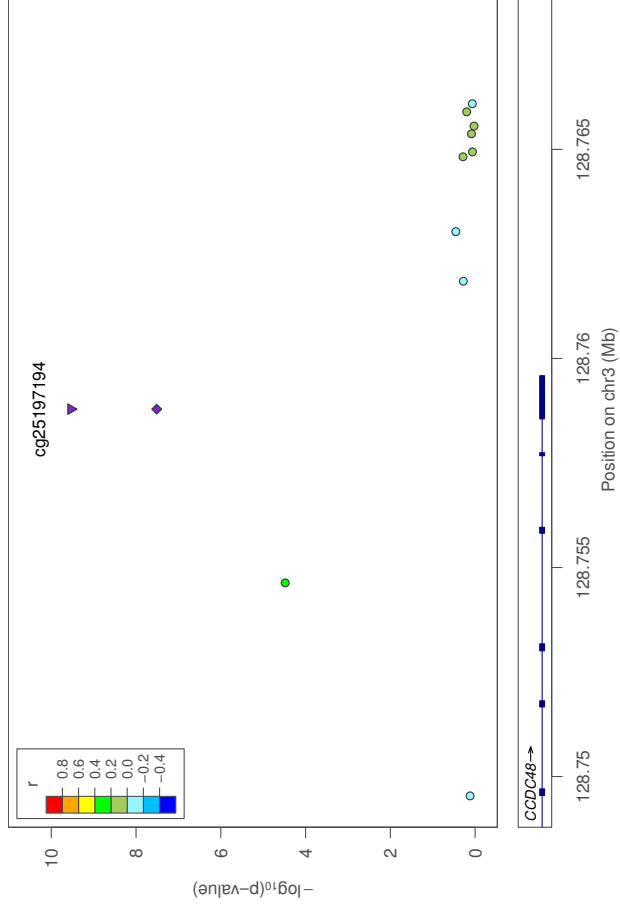

### LINC00880

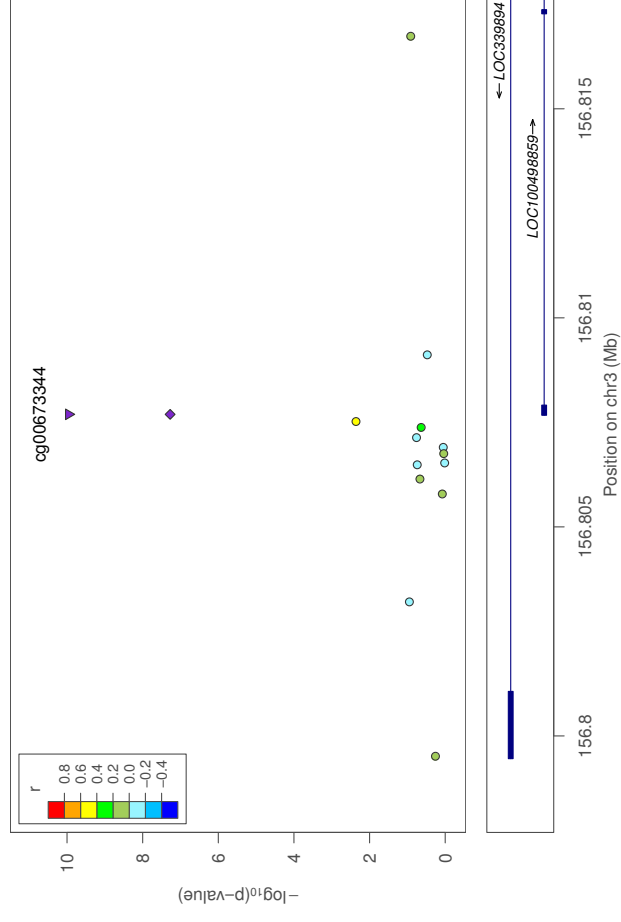

### GOLIM4

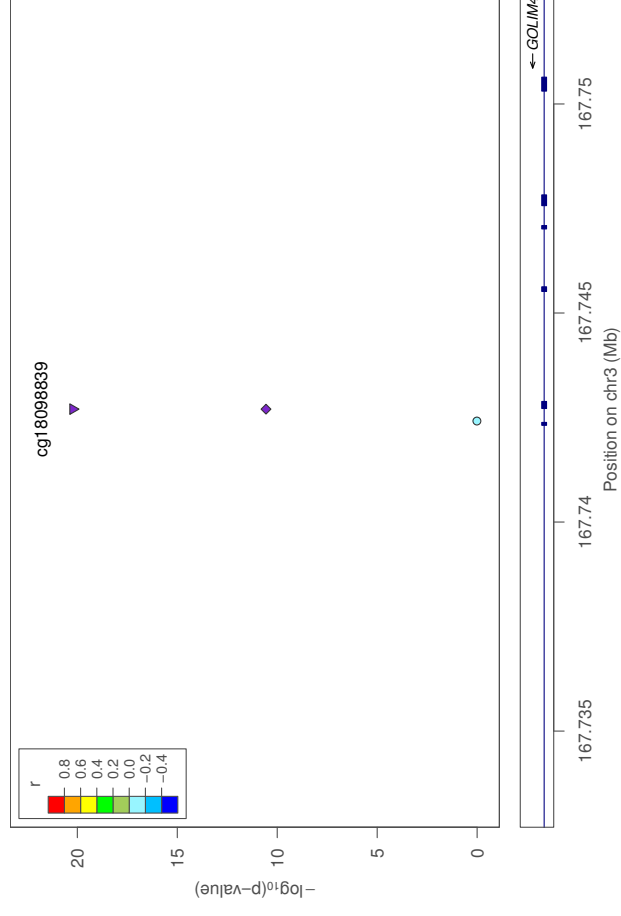

### SOX2-OT

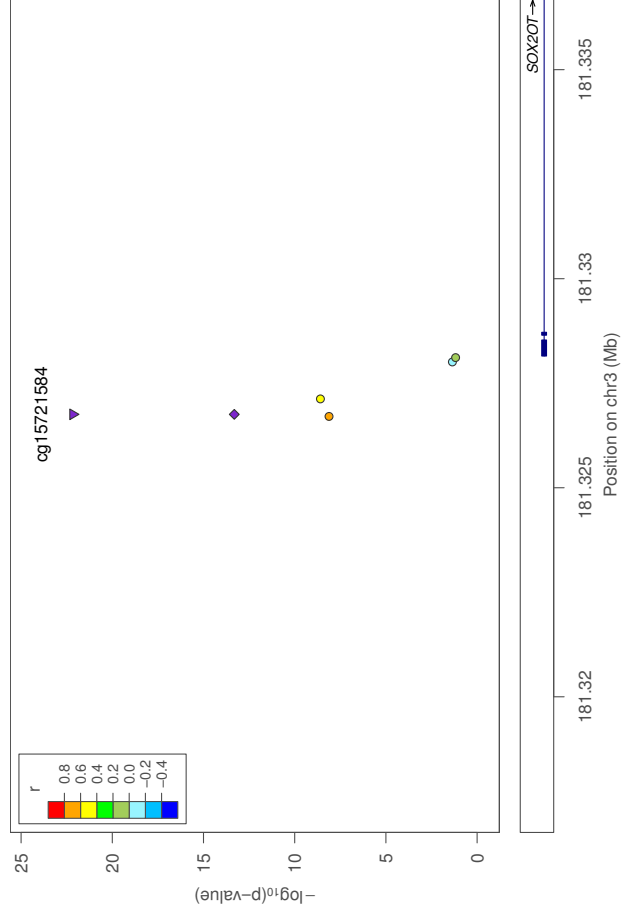

### ABCC5

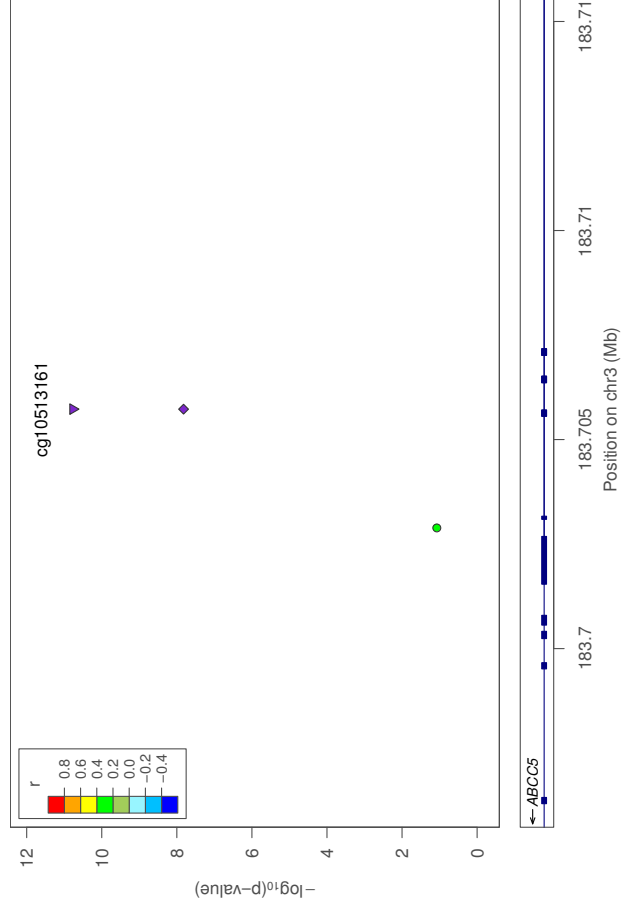

### BCL6

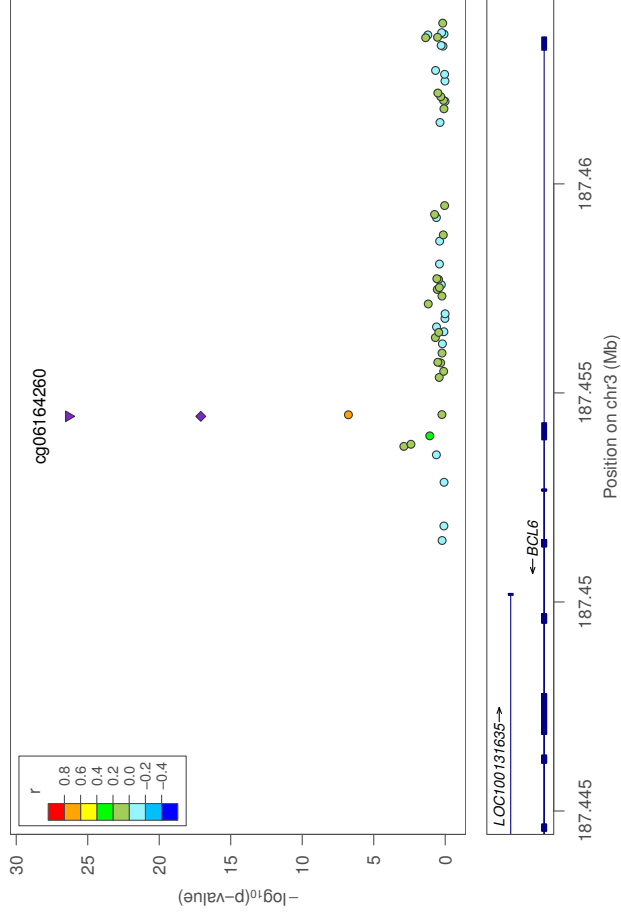

### MUC4

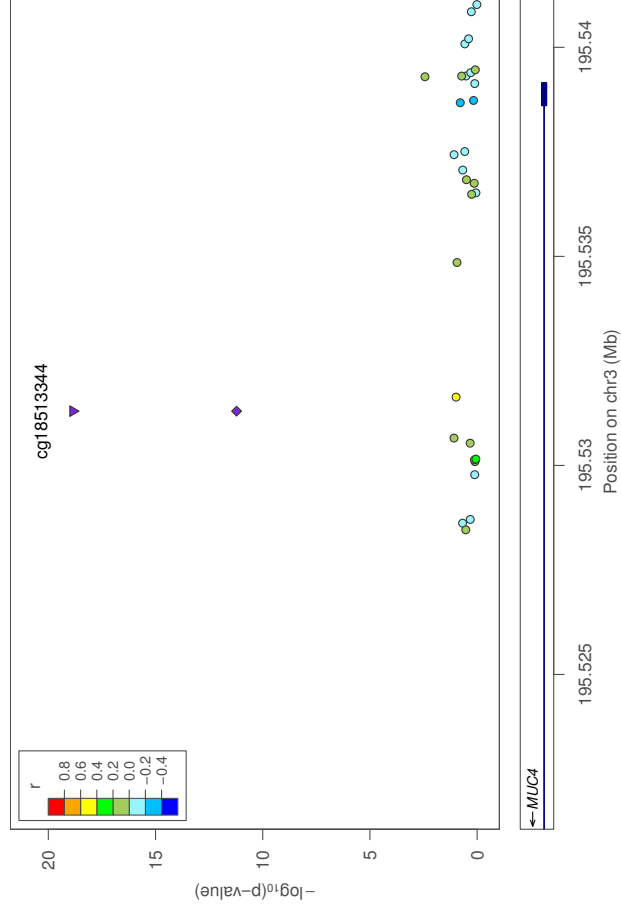

### LINC00504

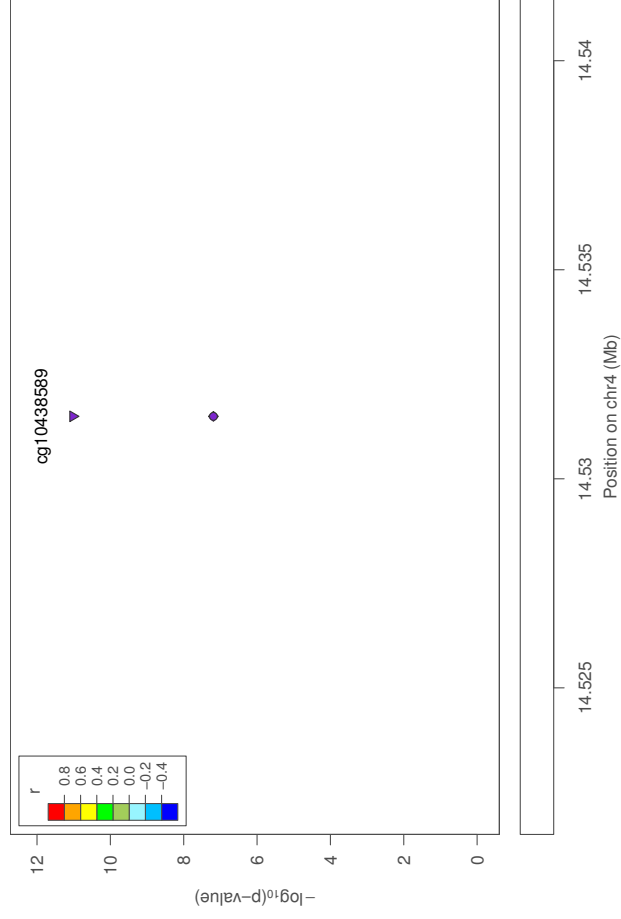

### CEP135

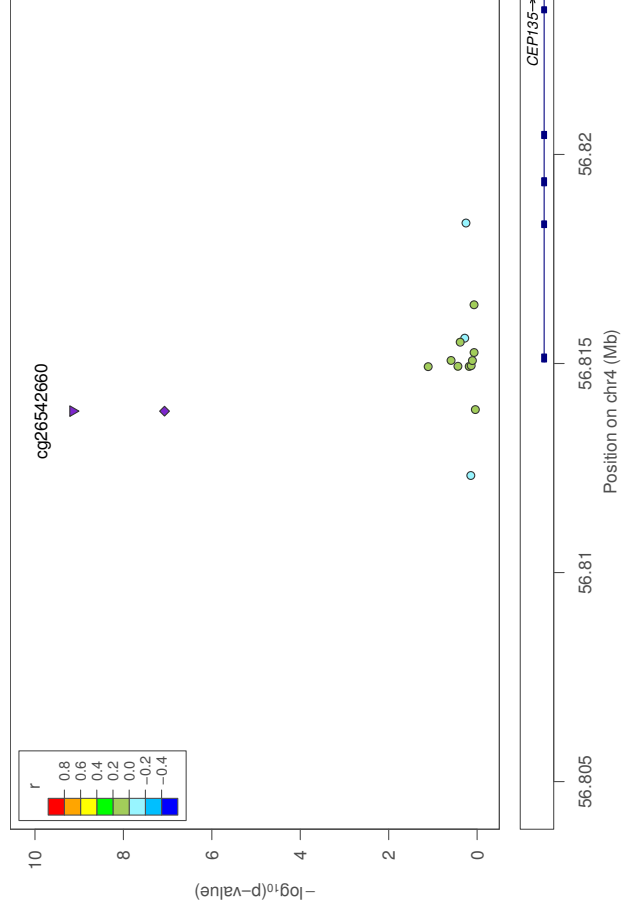

# SLC7A11

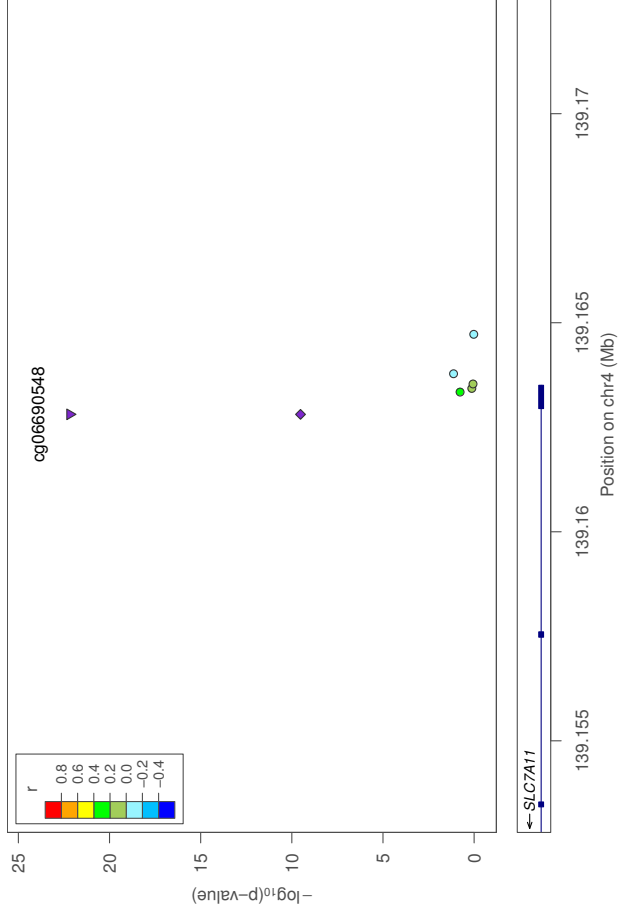

# ROPN1L

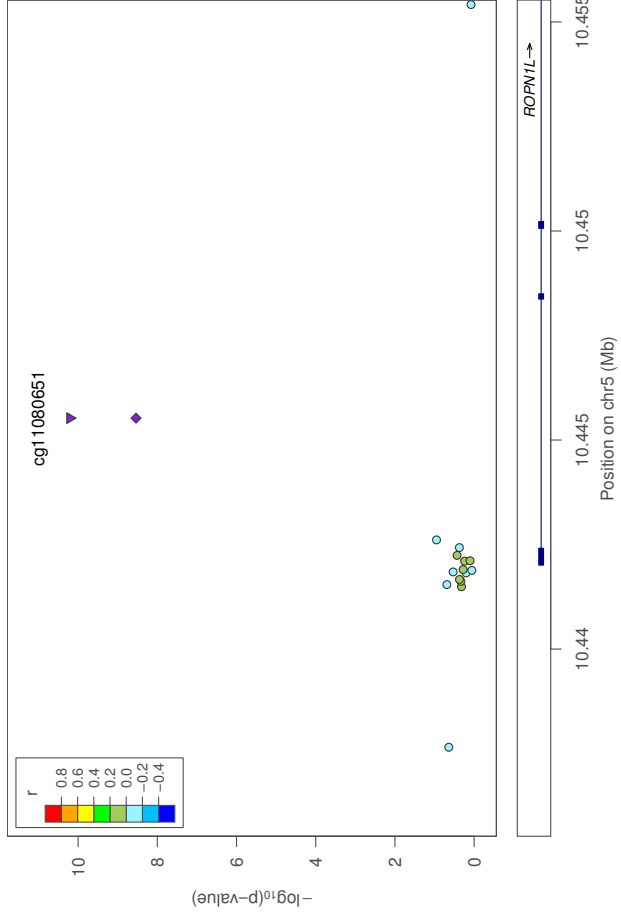

# TRIO

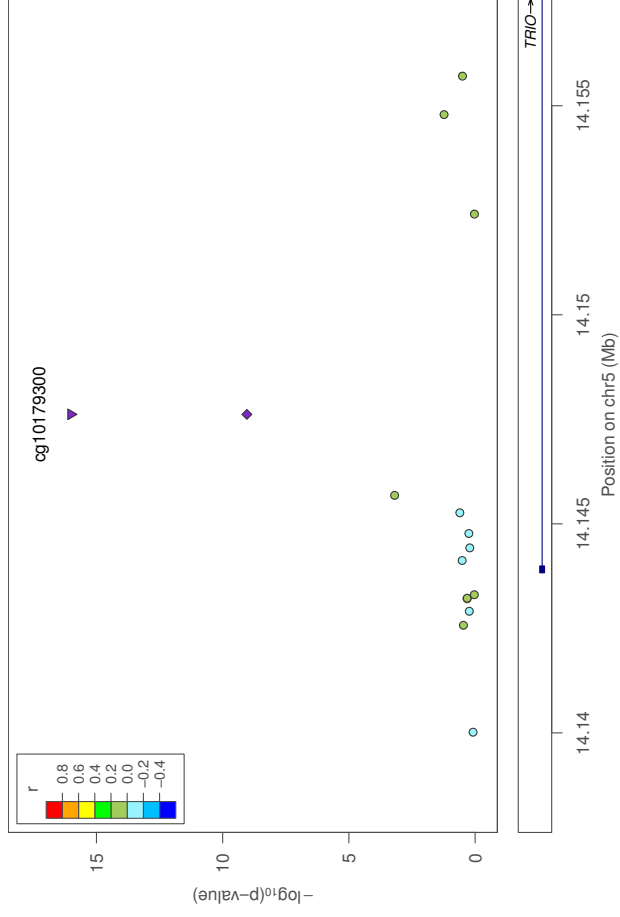

# TMEM173

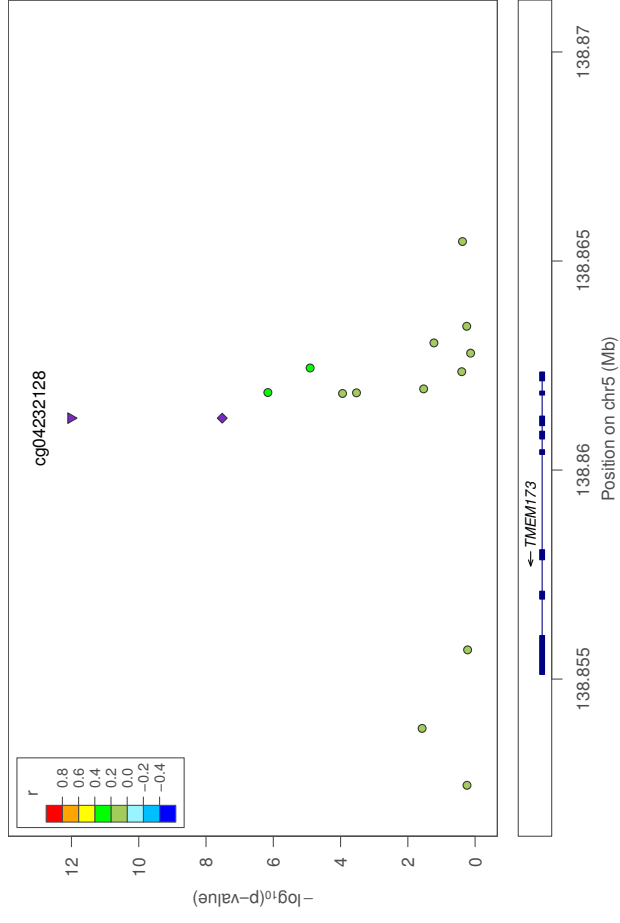



# RNF145

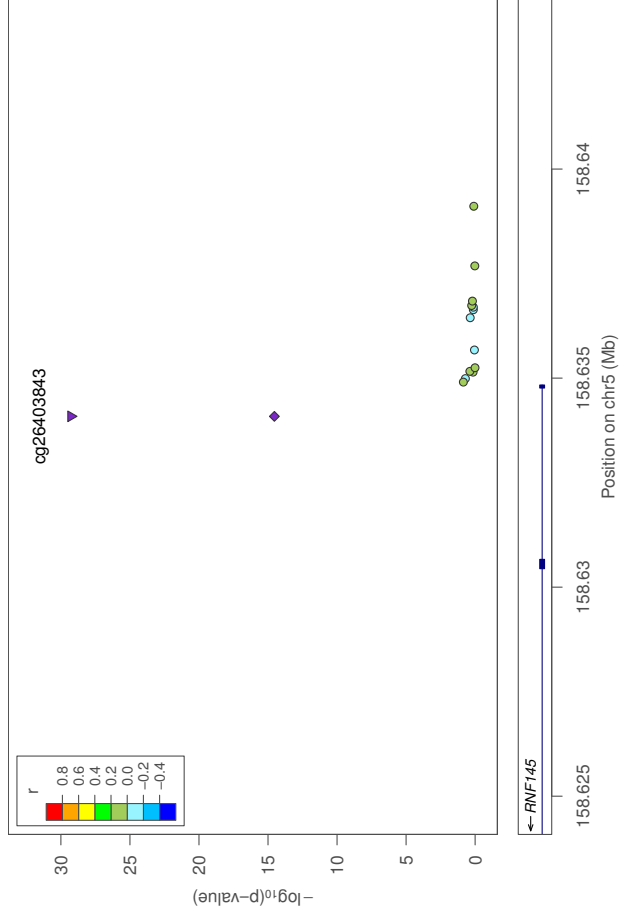

# NPM1

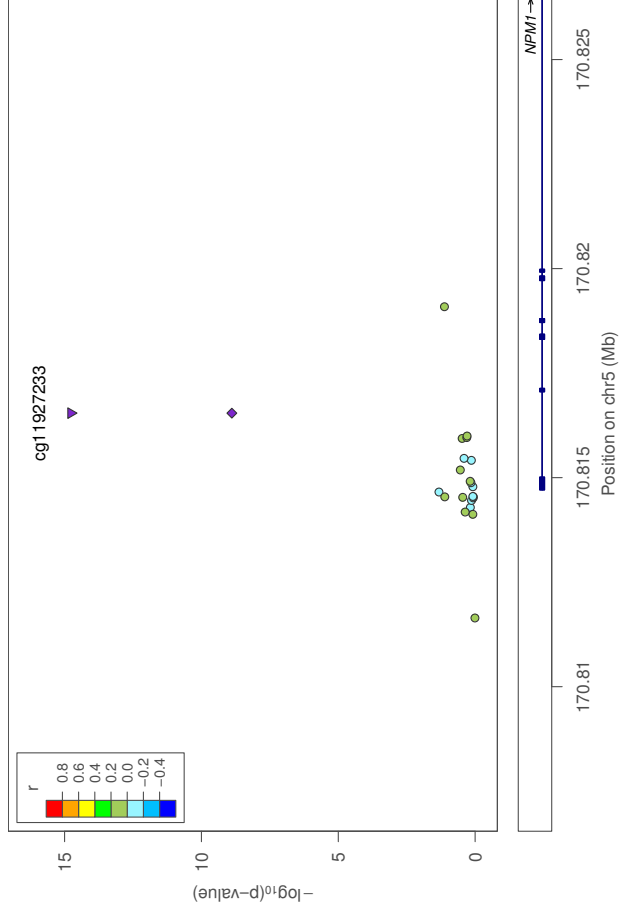

# SLC34A1

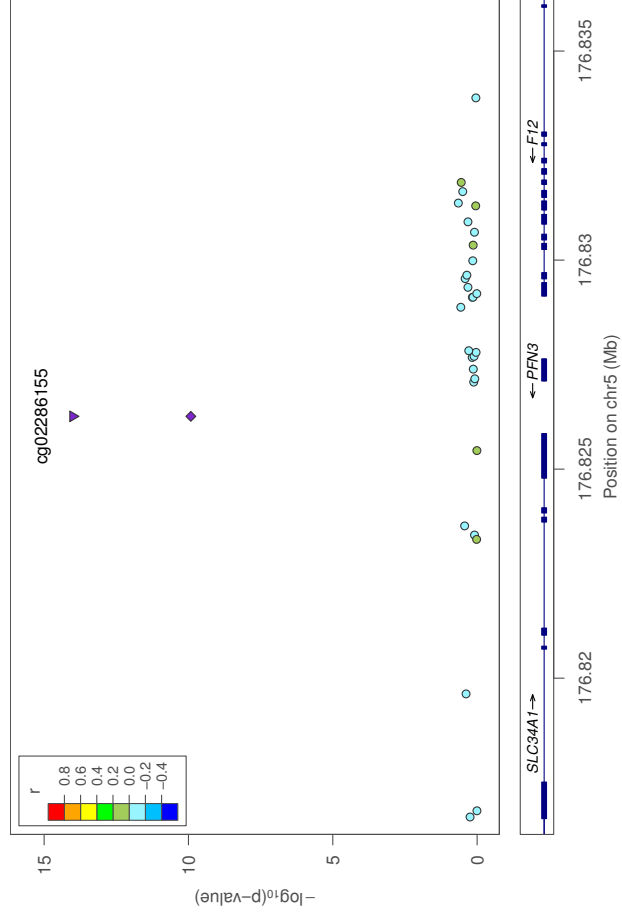

# FLT4

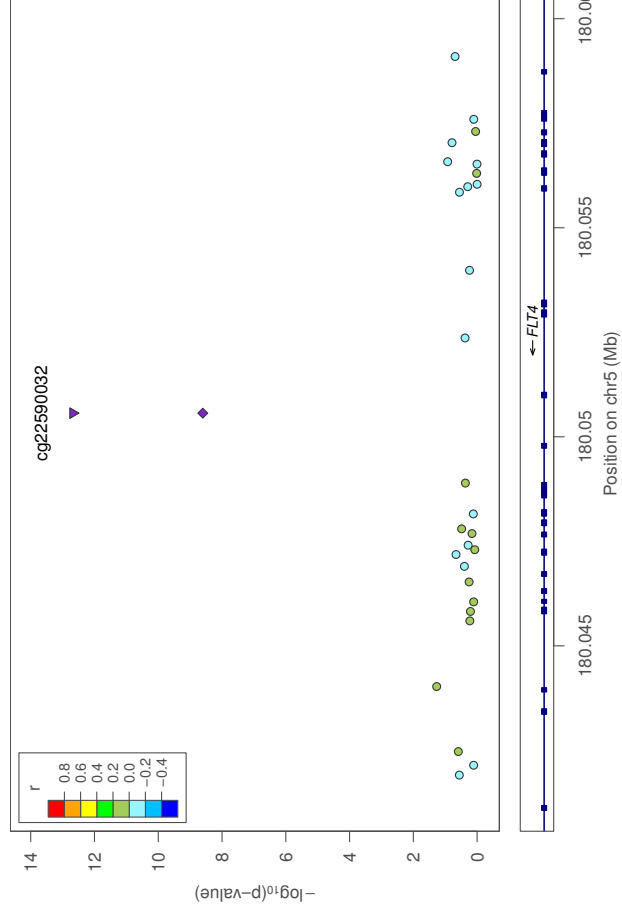

## EXOC2

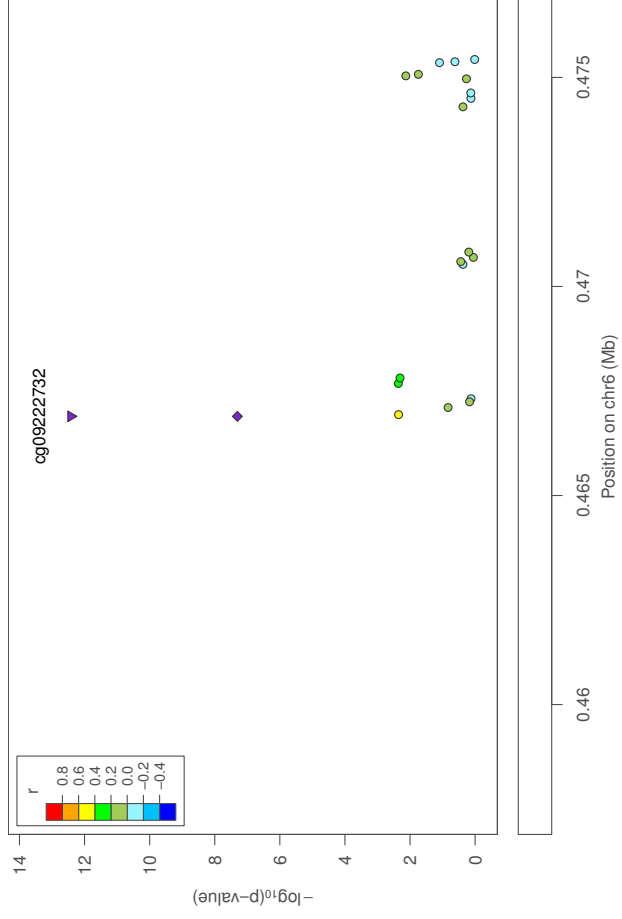

## JARID2

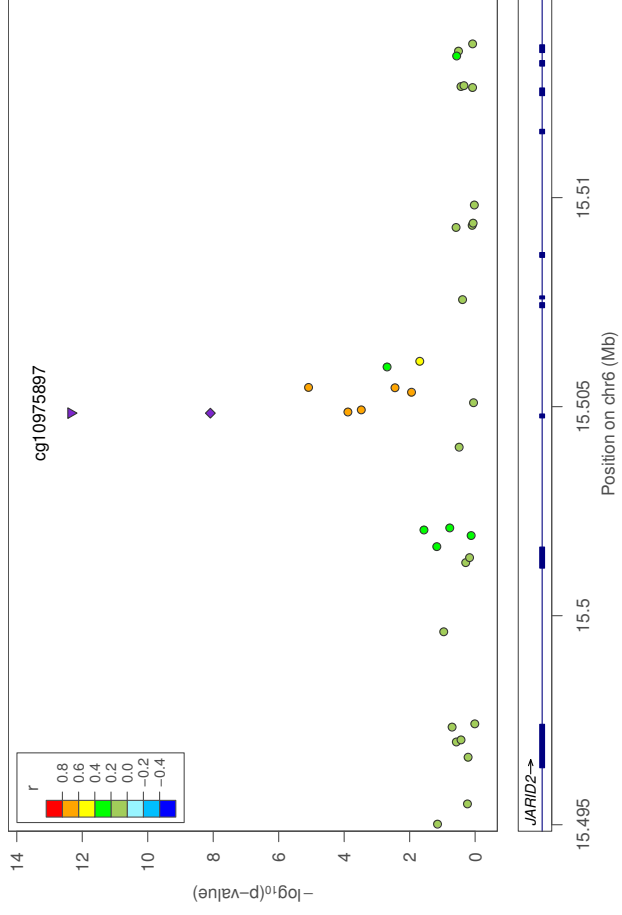

## GABBR1

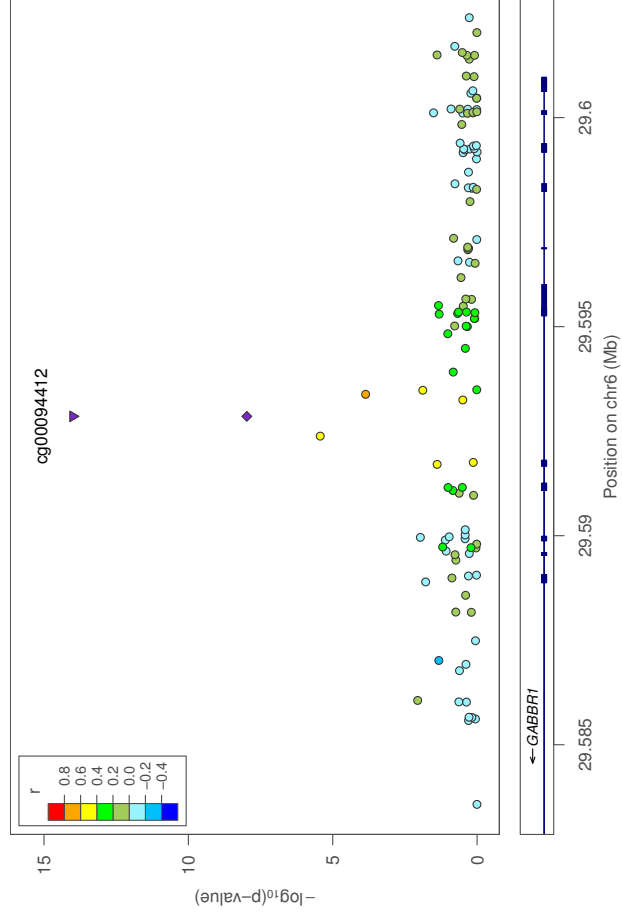

## LY6G6F

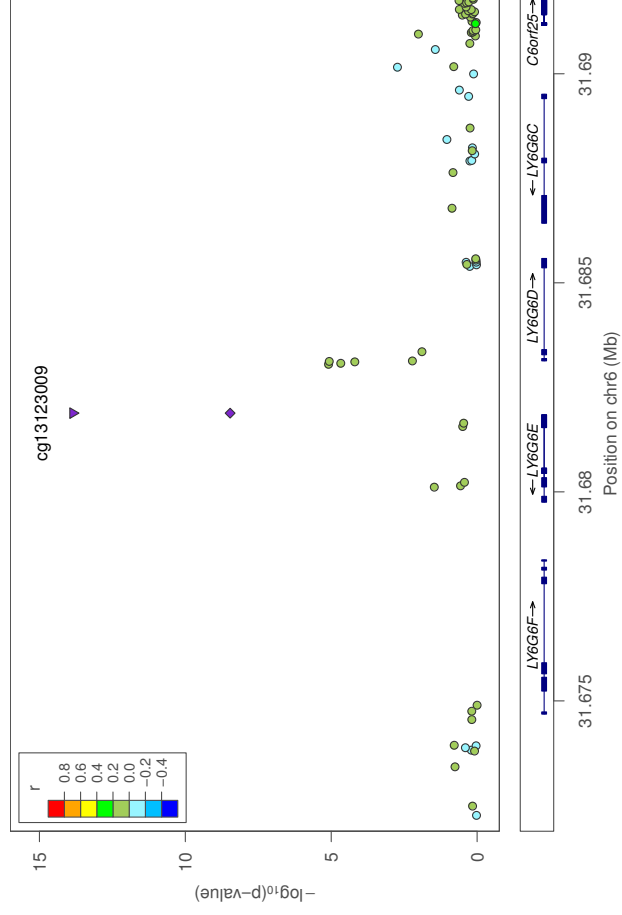

# COX6A1P2

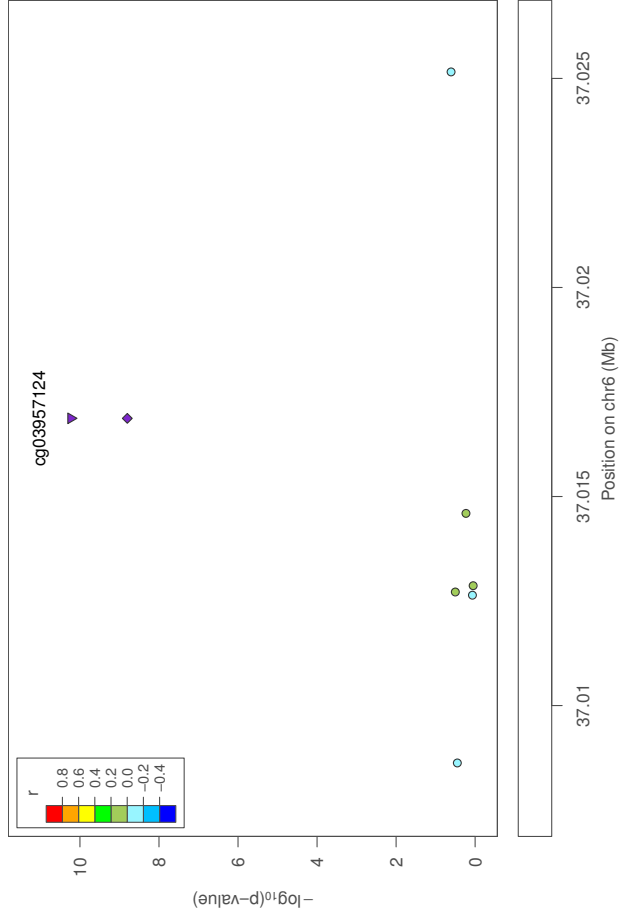

# C6orf223

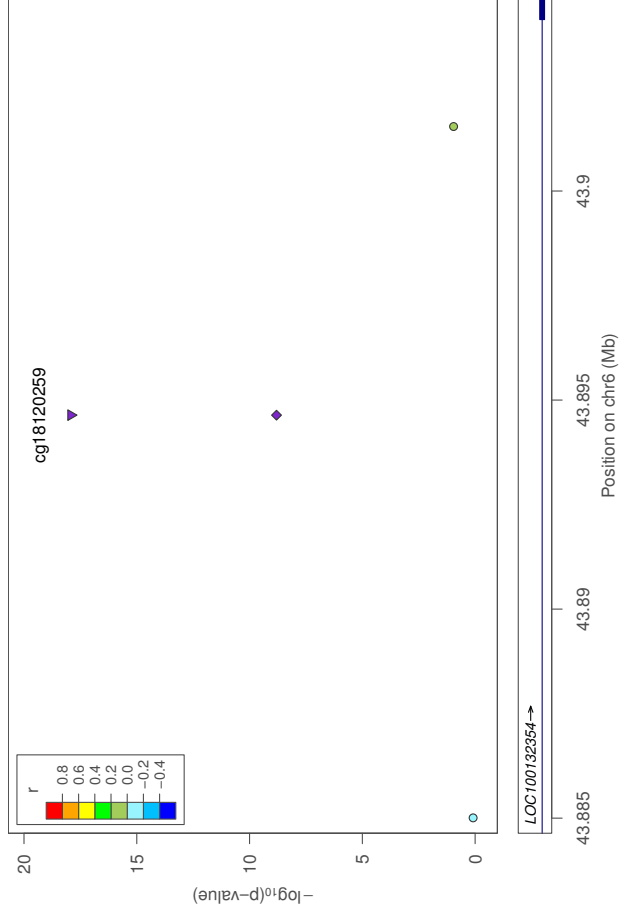

# ARID1B

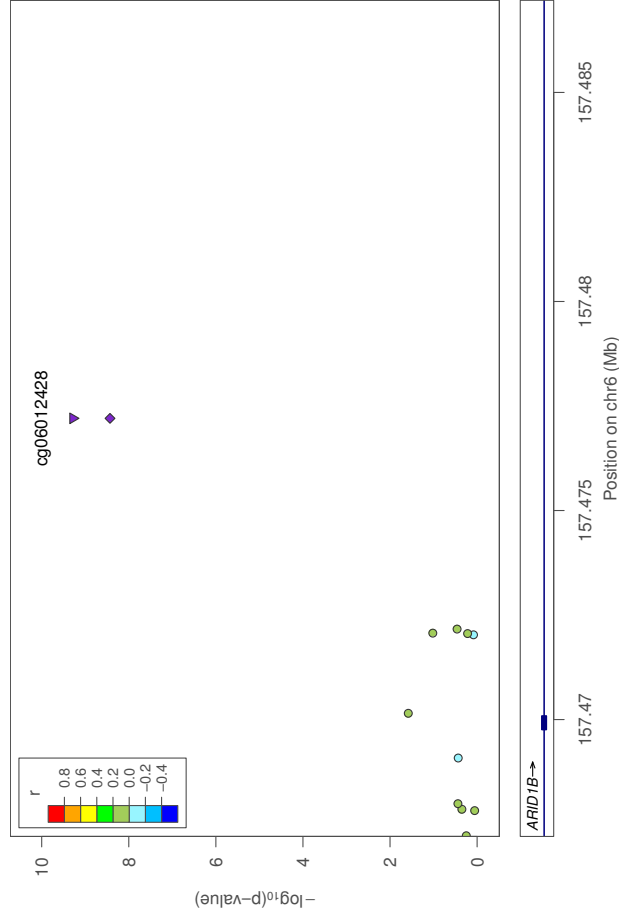

# SYNJ2

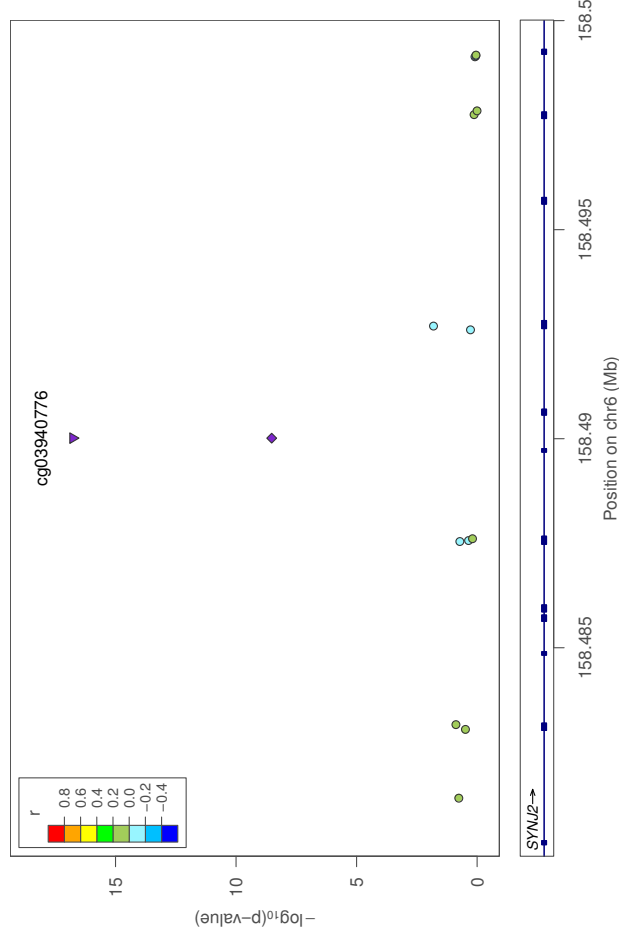

## RPS6KA2

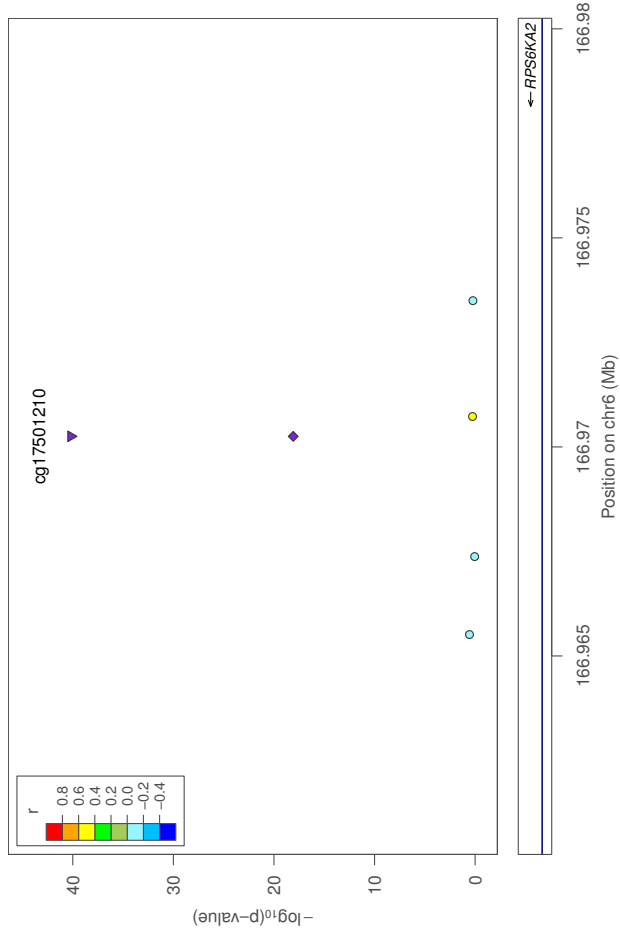

## MAD1L1

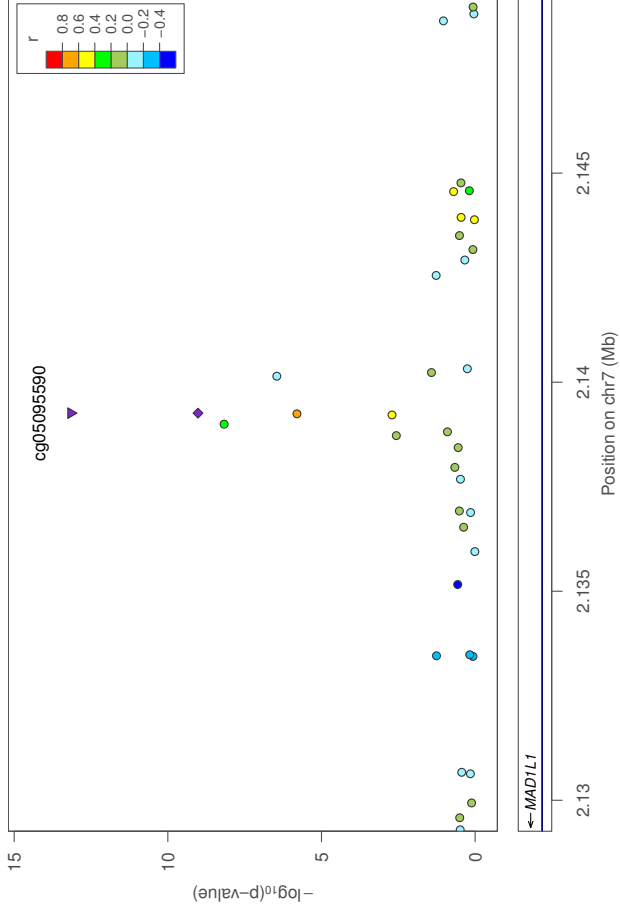

## ICA1

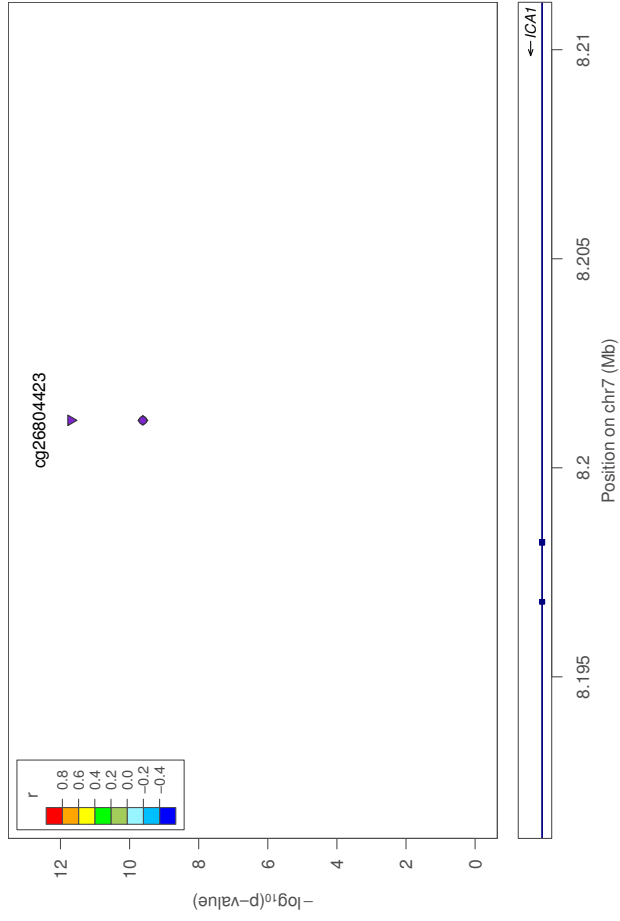

## HOXA-AS2

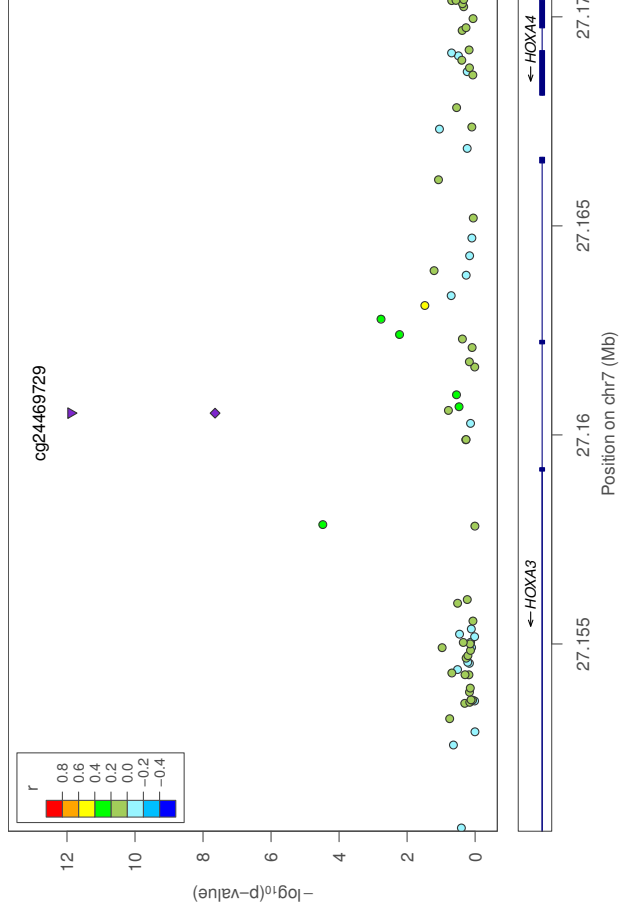

## GARS

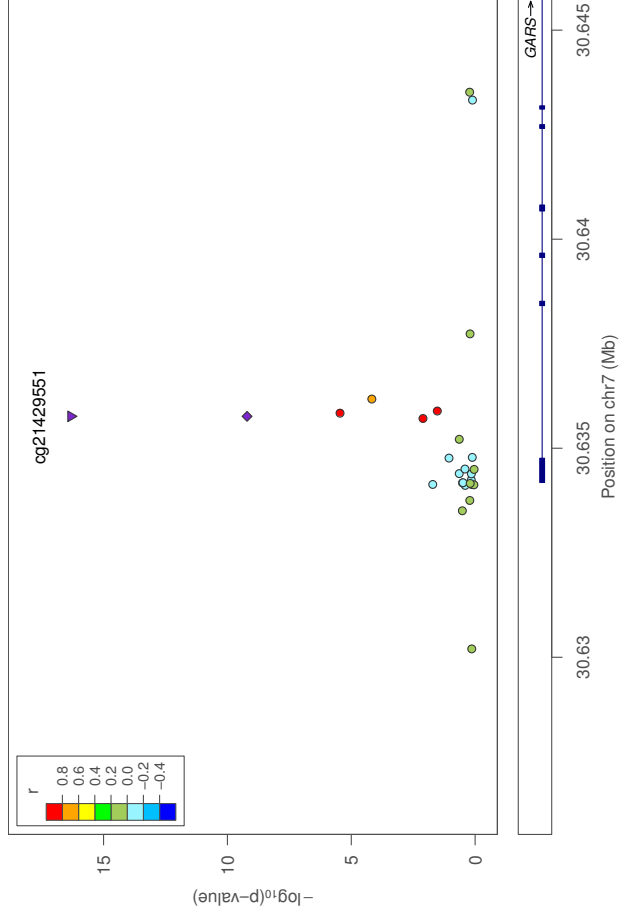

## RFC2

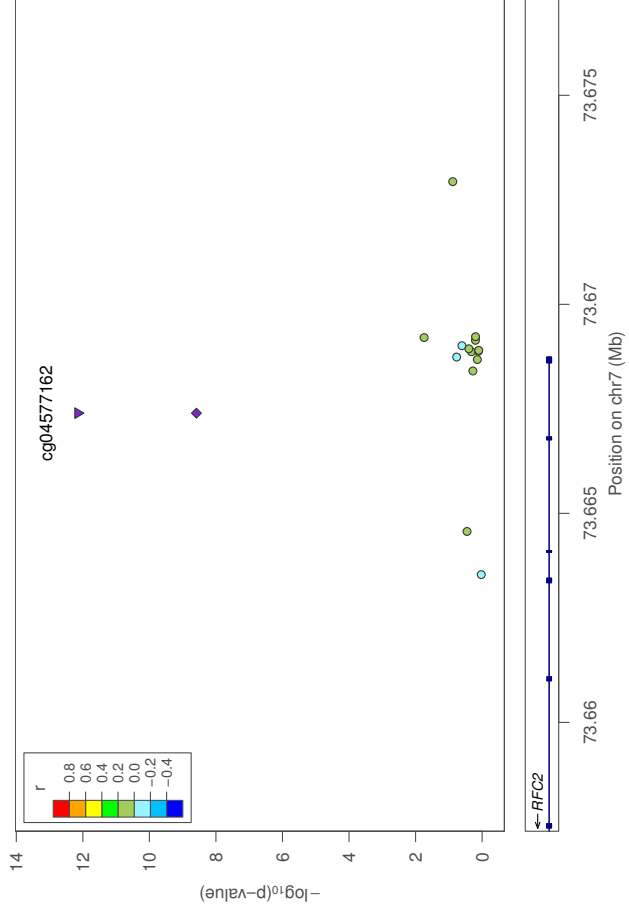

## TRIP6

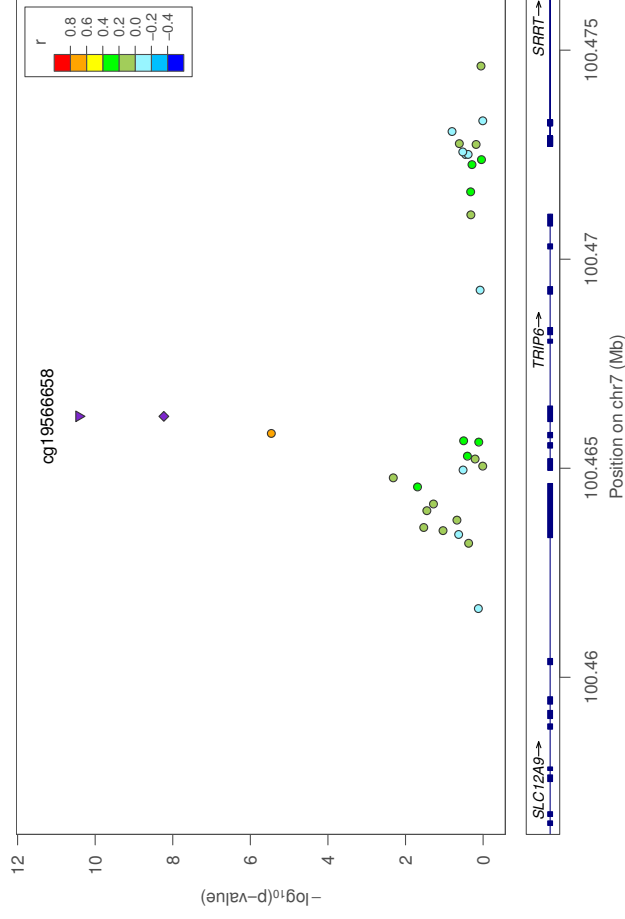

## SH2B2

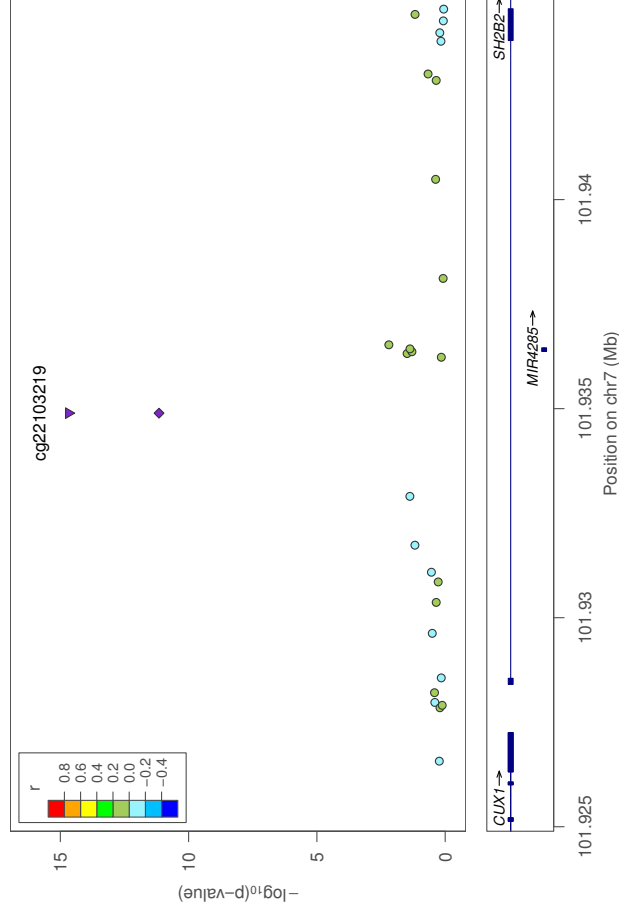

### ST7

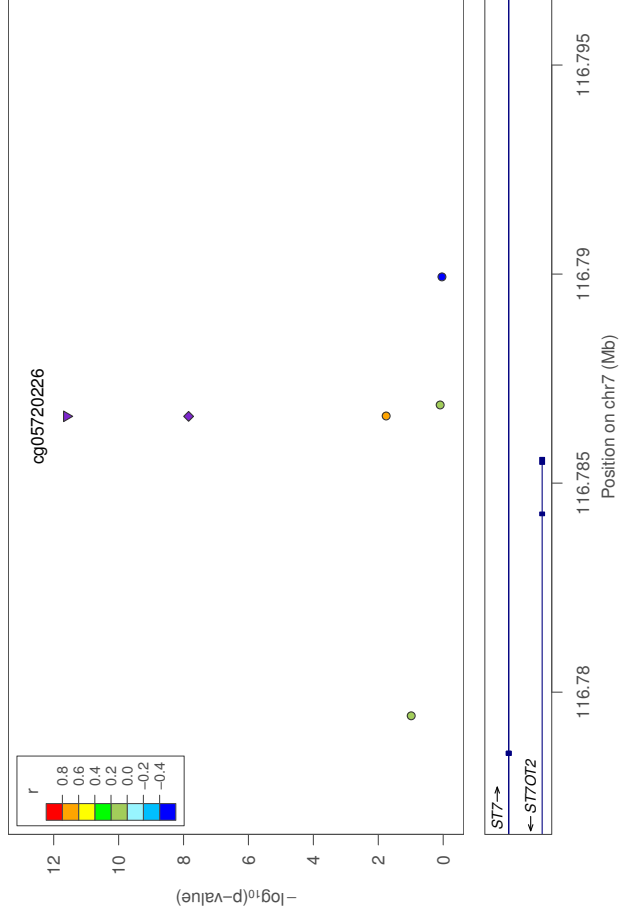

### SND1

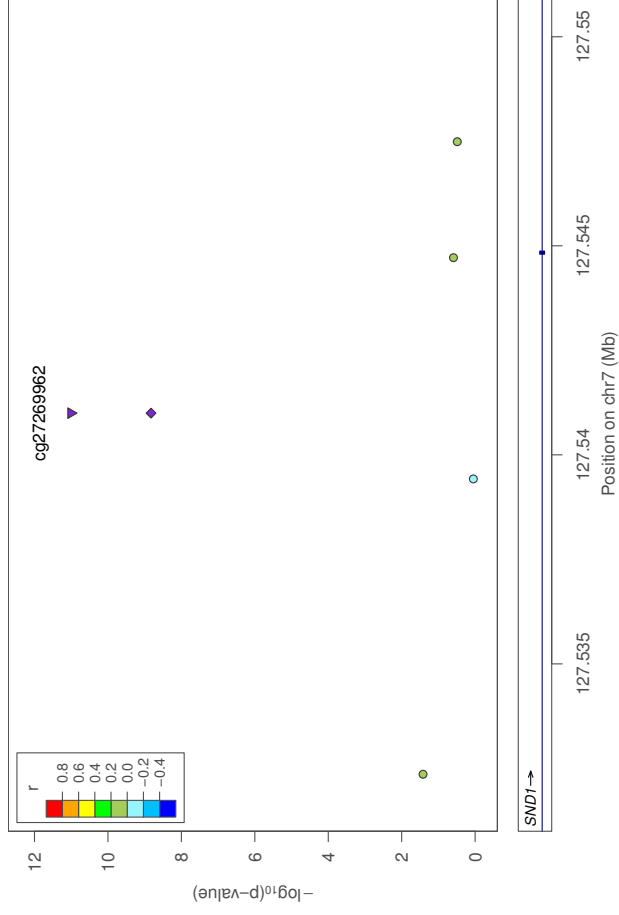

### RN7SL142P

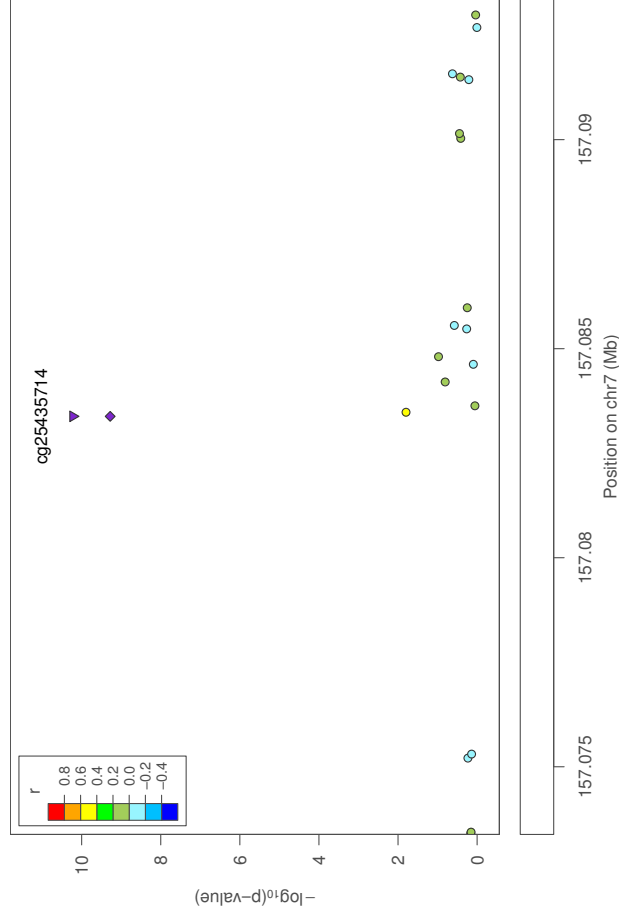

### LOXL2

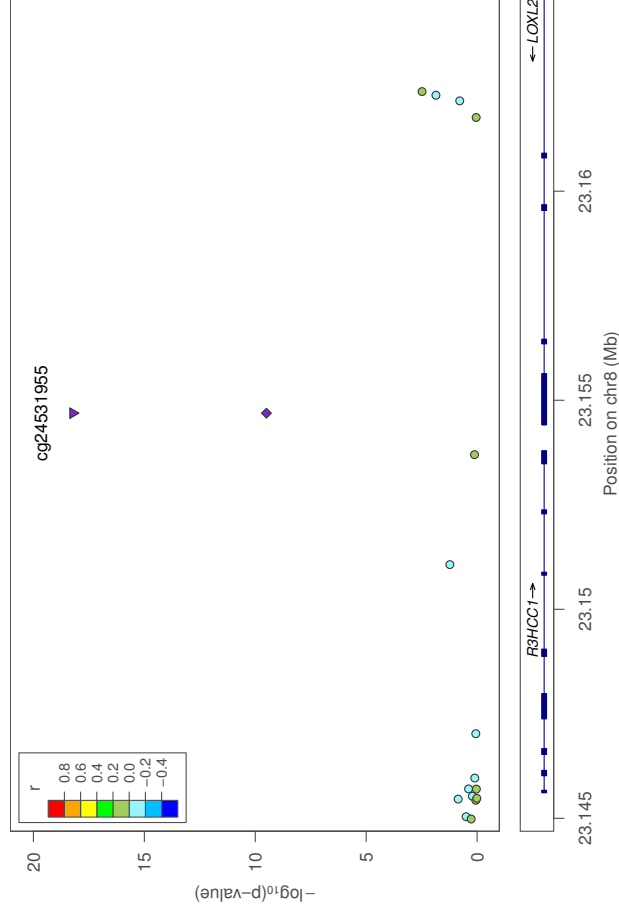

# RPL5P24

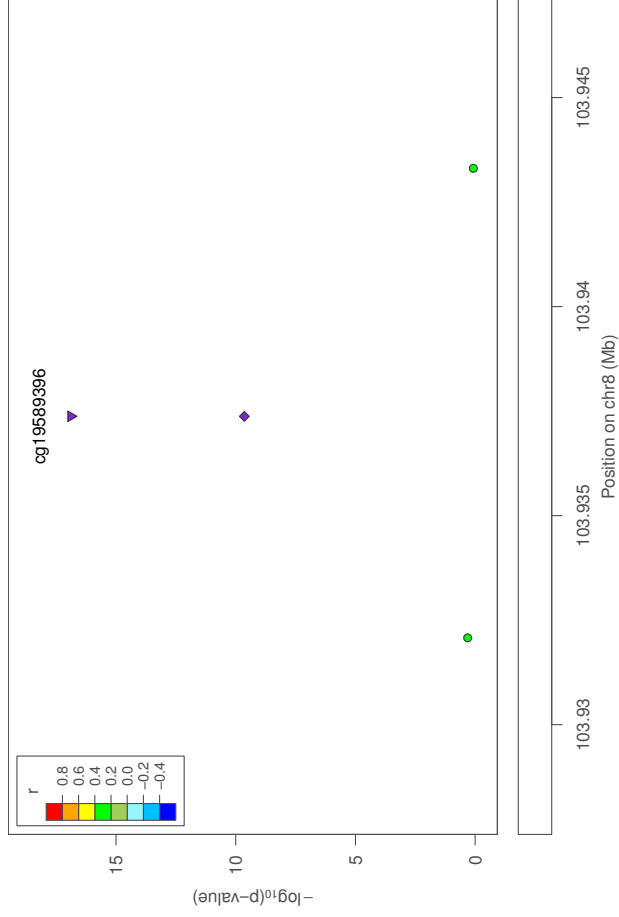

# LINC00964

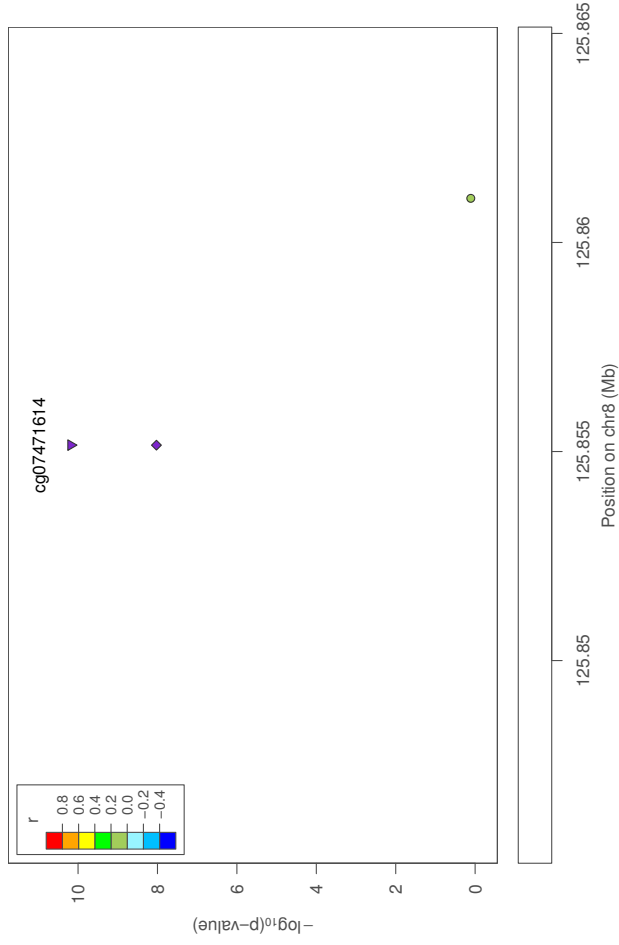

# SLC45A4

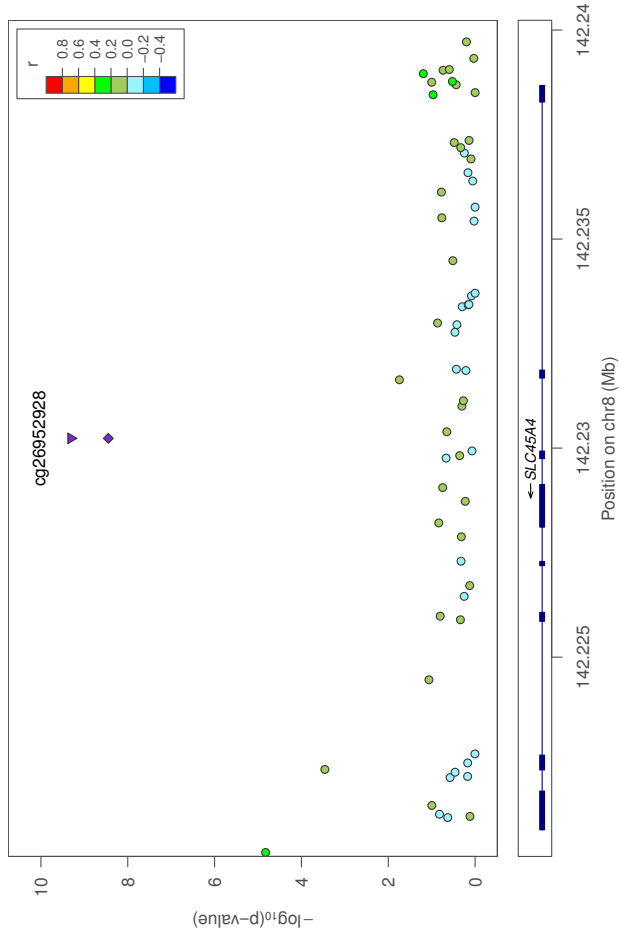

# ZC3H3

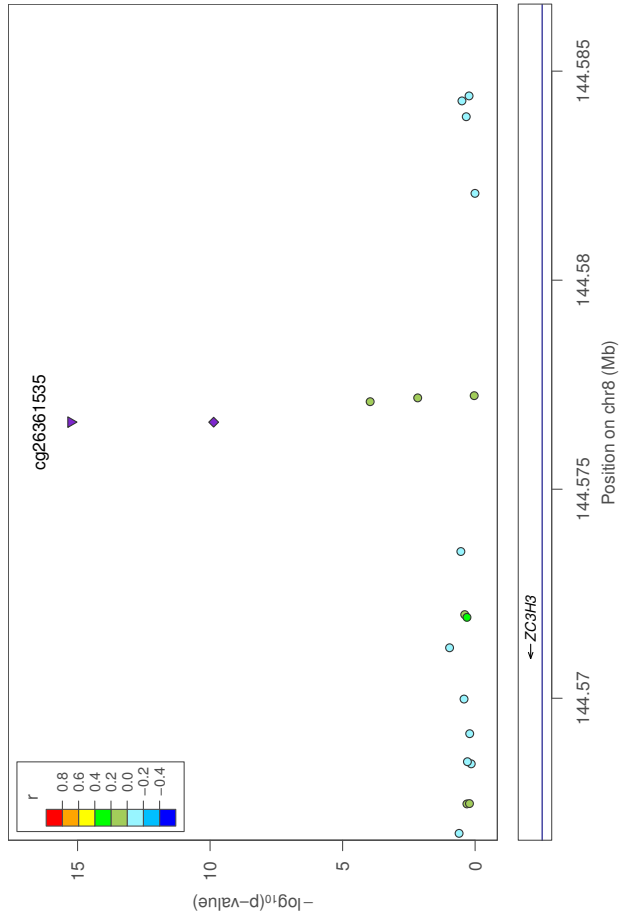

### AQP3

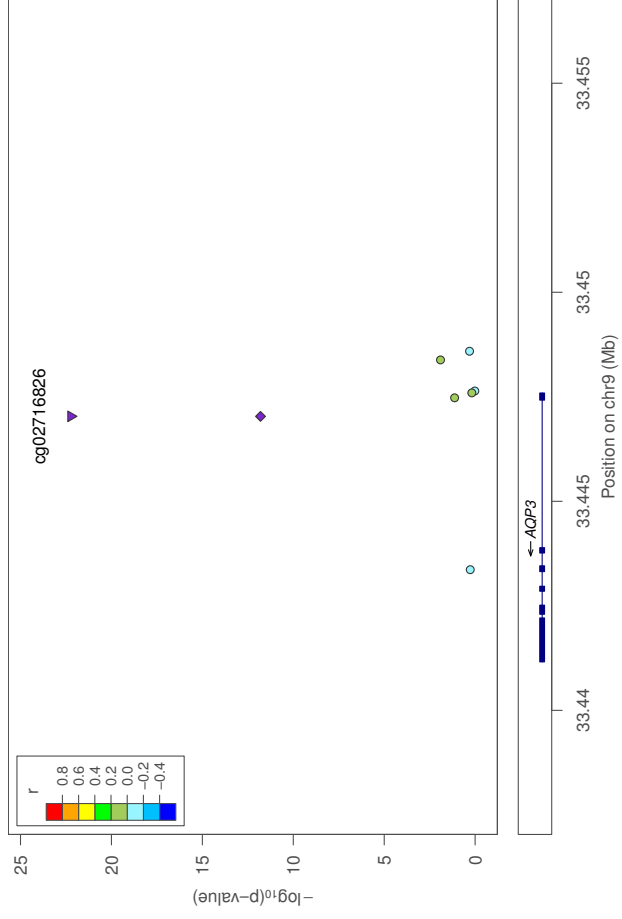

### ANXA1

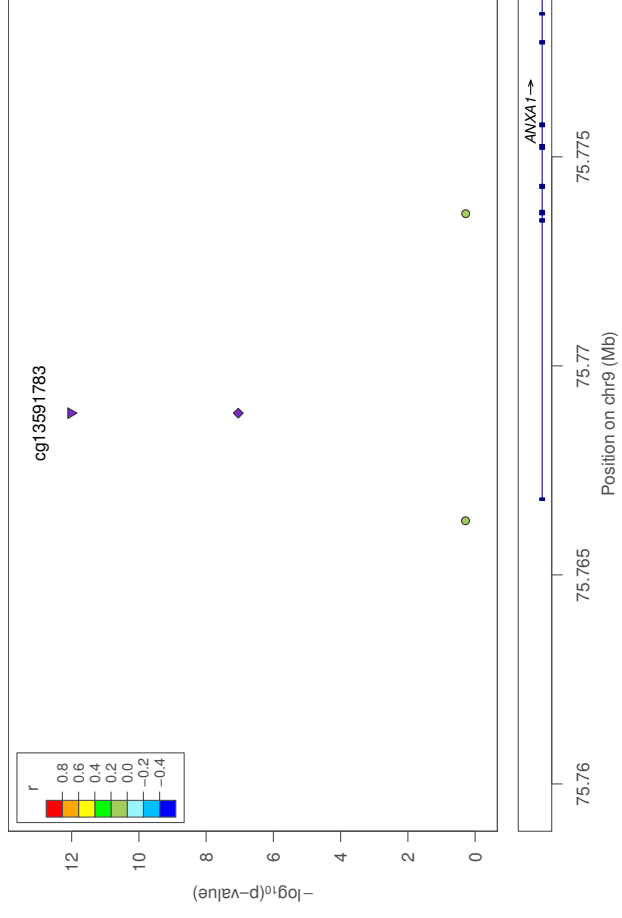

### PRRC2B

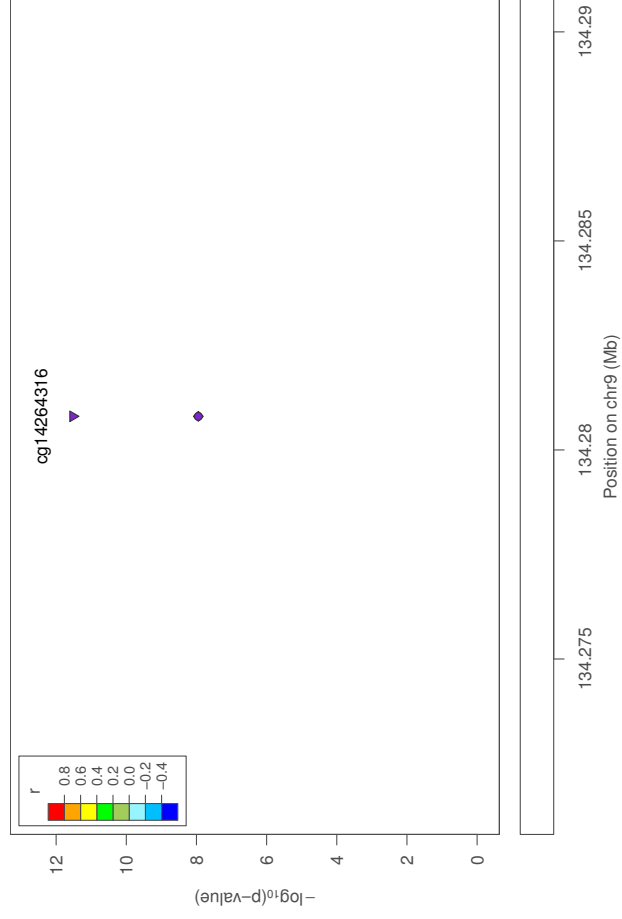

### NACC2

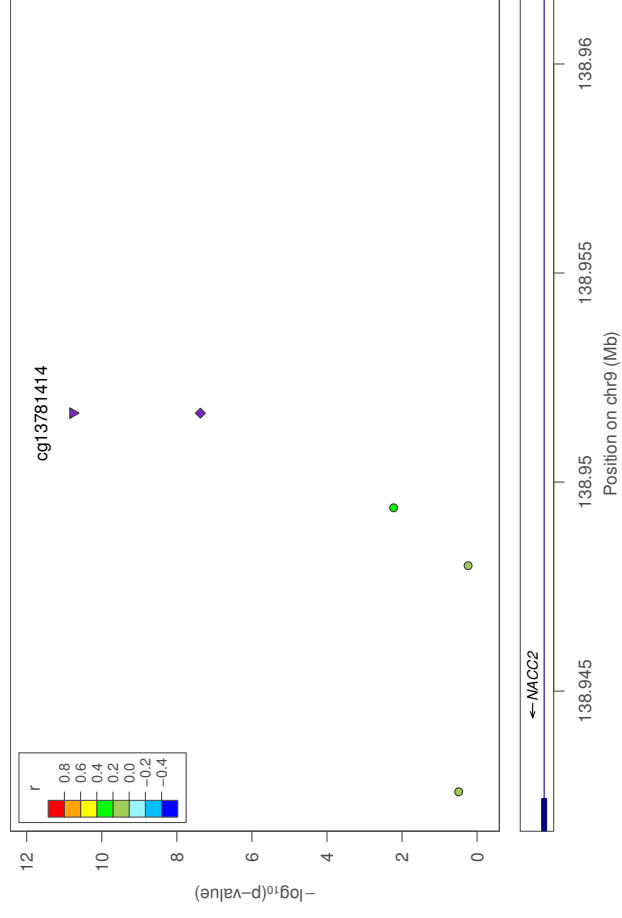



# BEND7

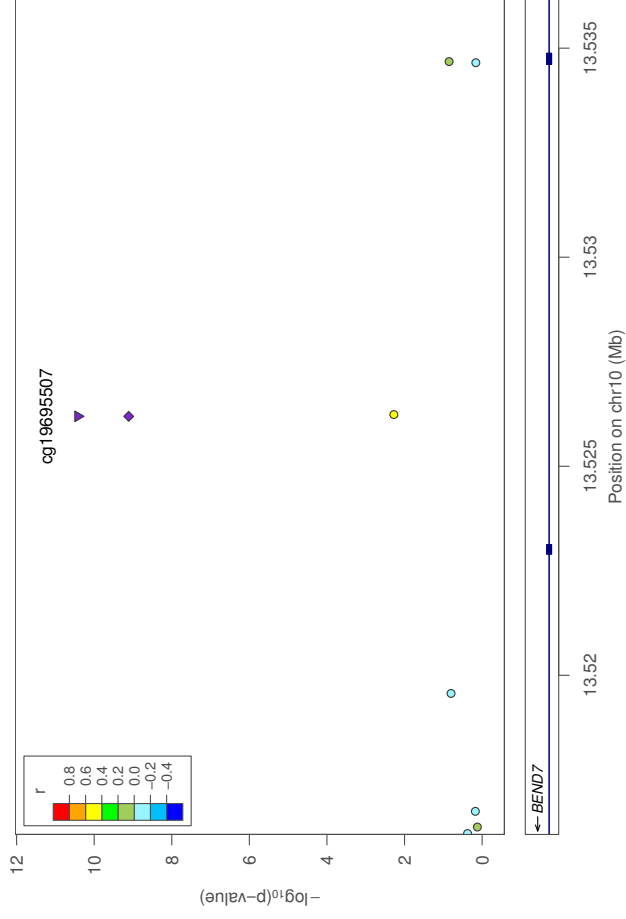

# ANAPC16

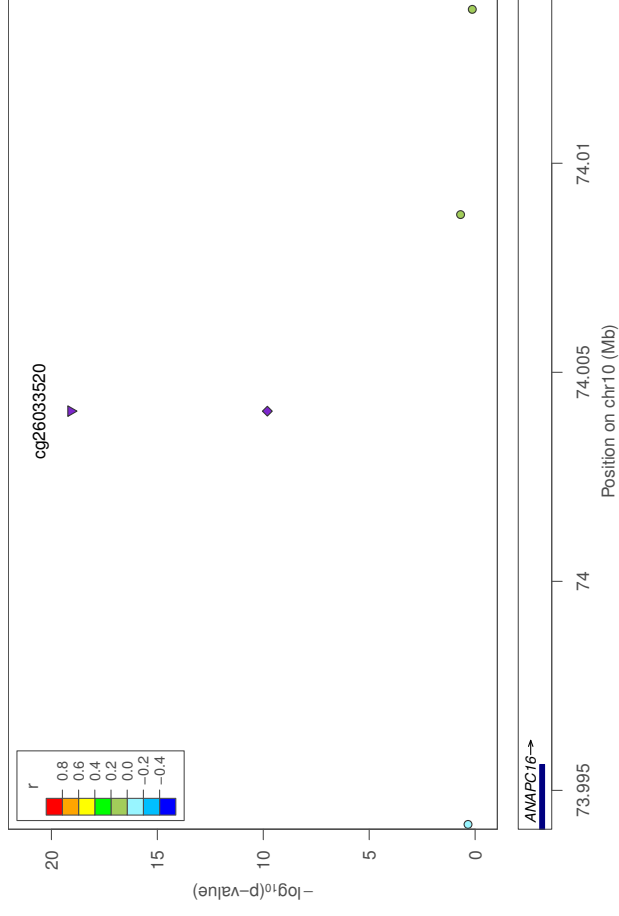

# C10orf99

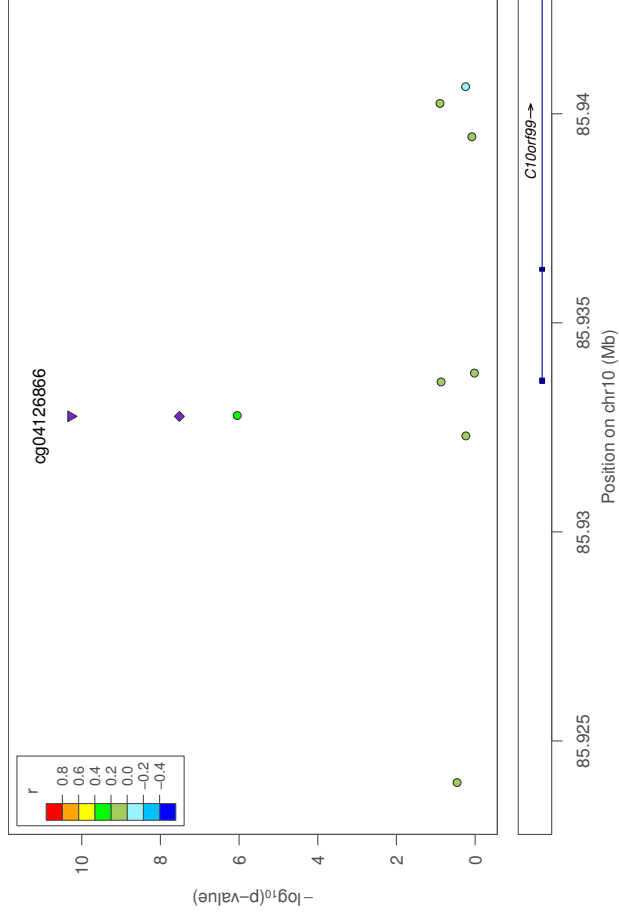

# PCGF5

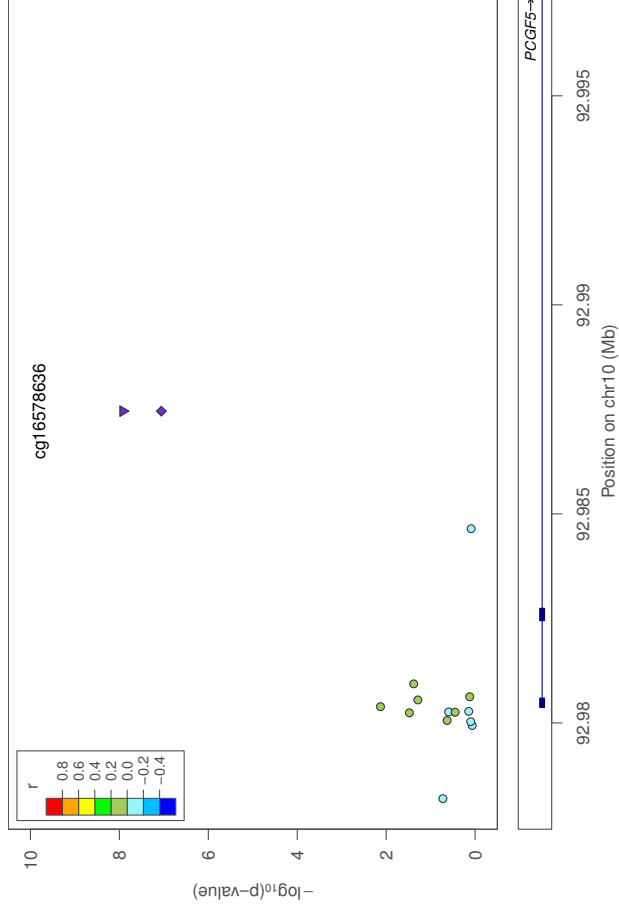

# LINC00263

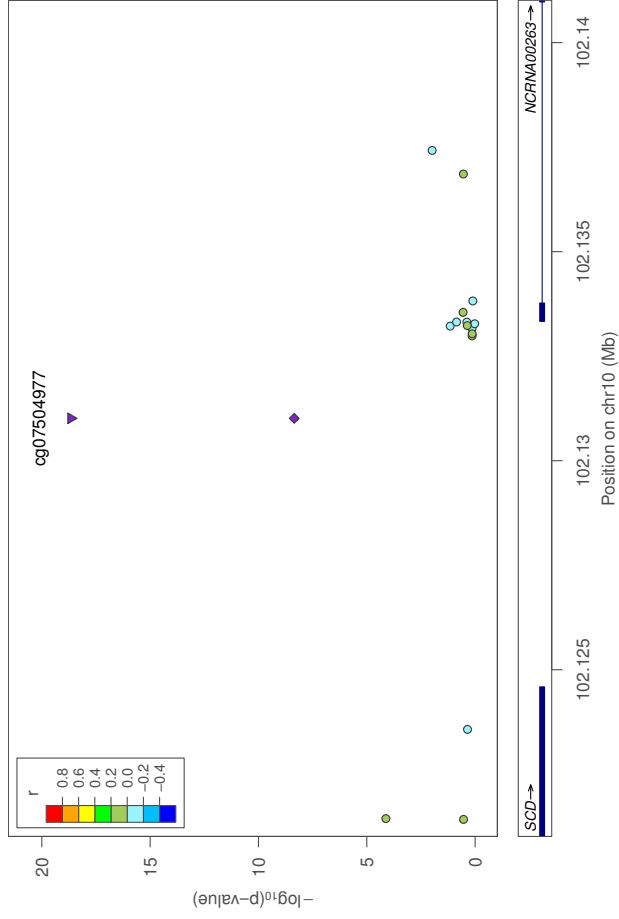

# ELOVL3

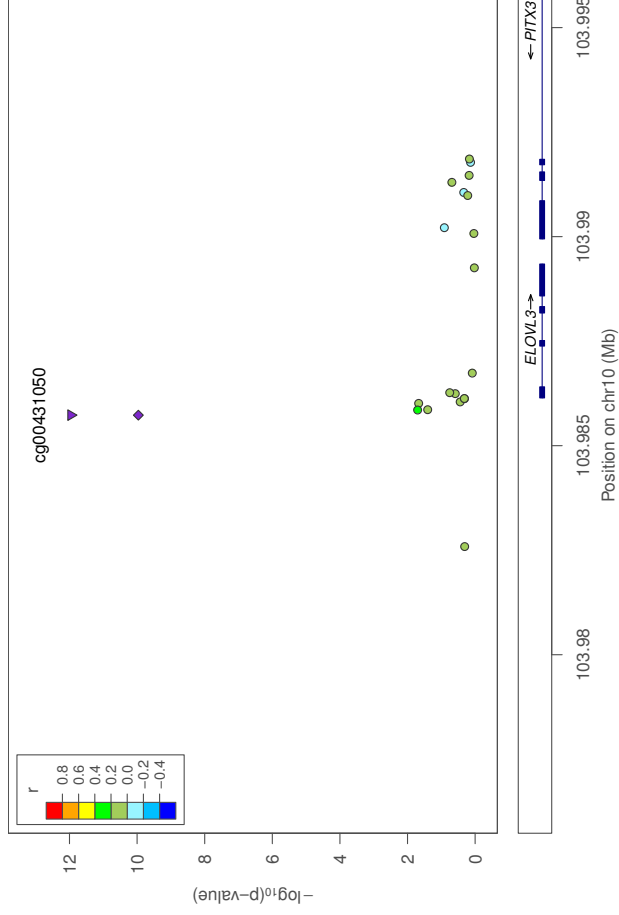

# SMC3

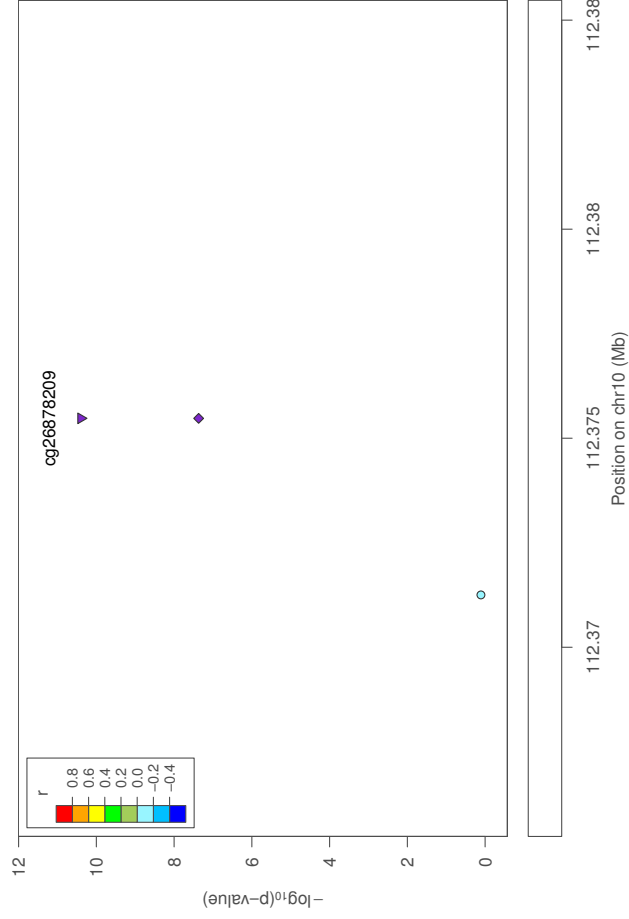

# FAM53B

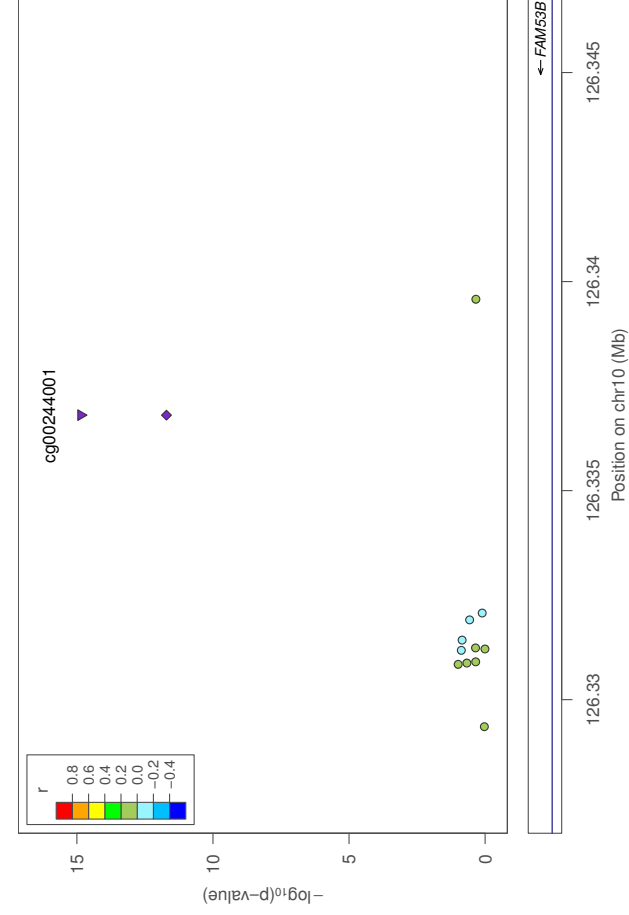

# PTPRE

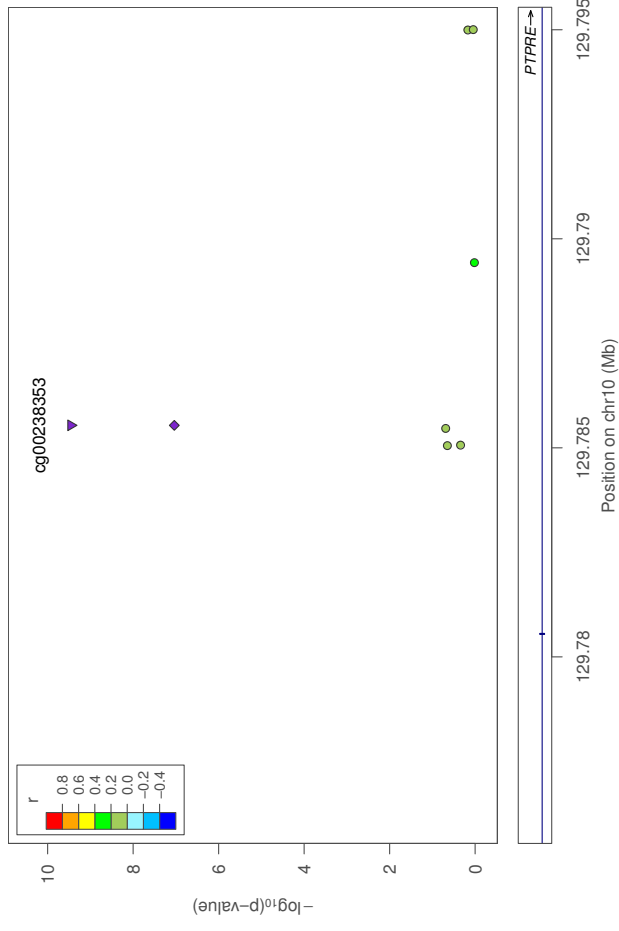

# CTSD

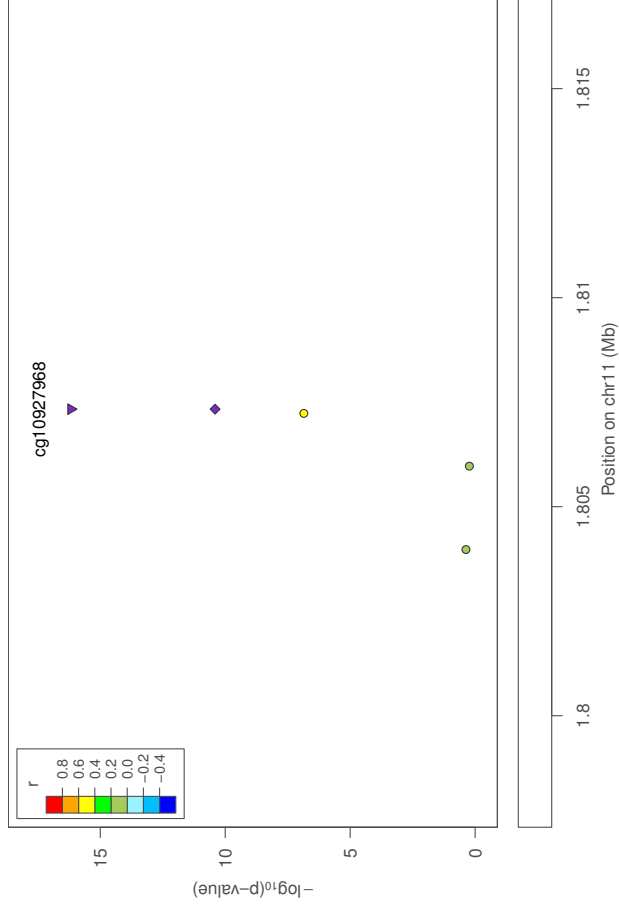

# KCNQ1

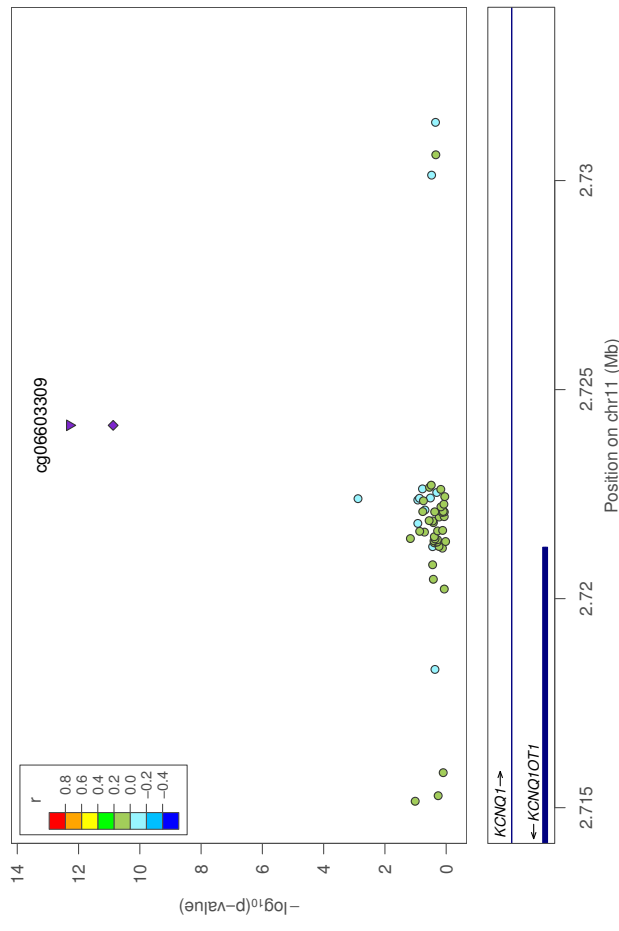

# PRR5L

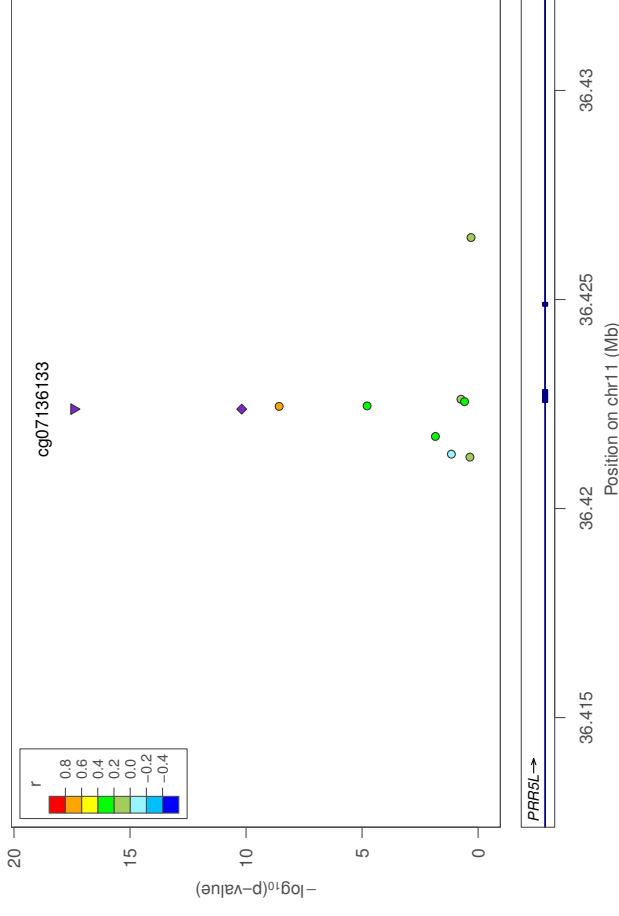

### CD82

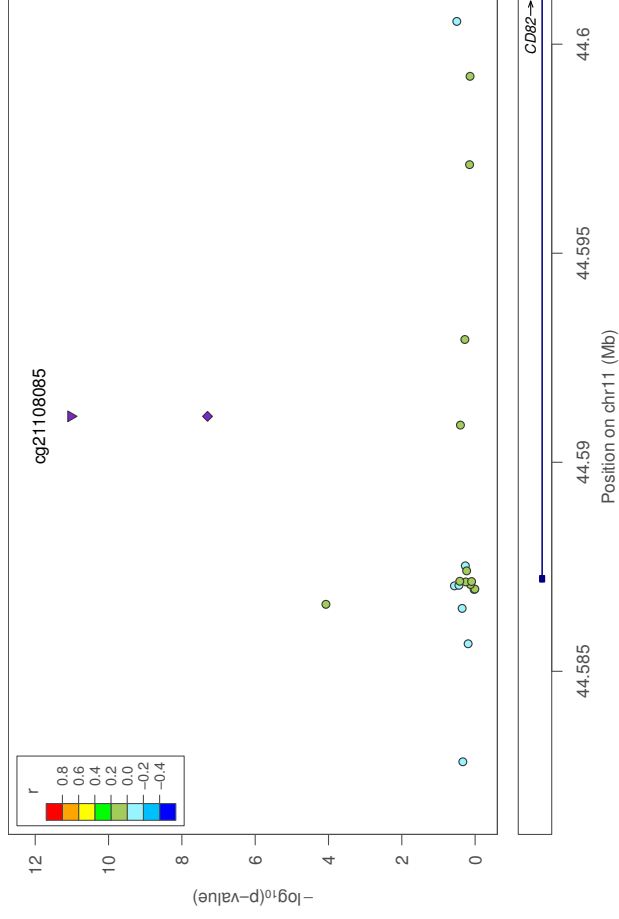

### PRDM11

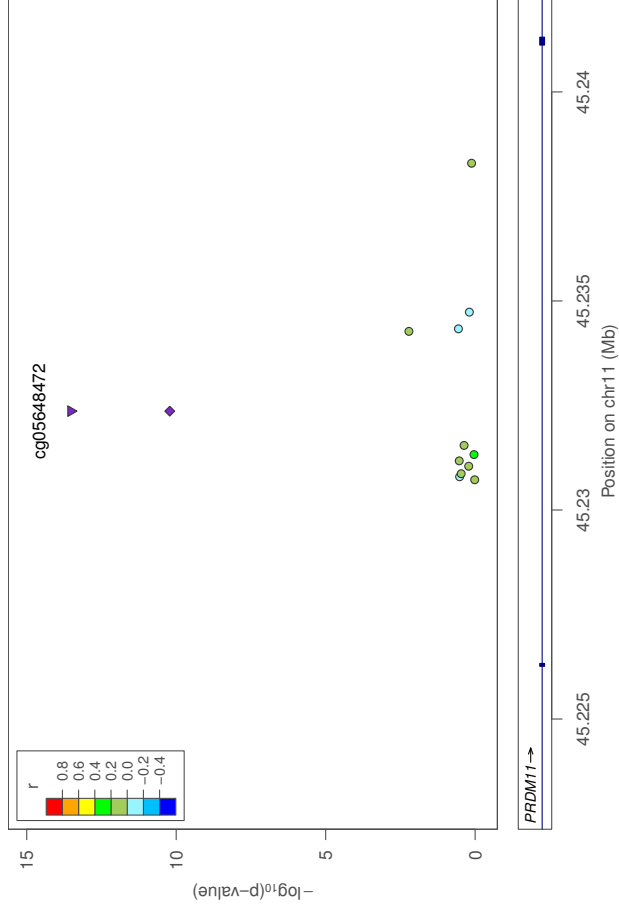

### SLC43A1

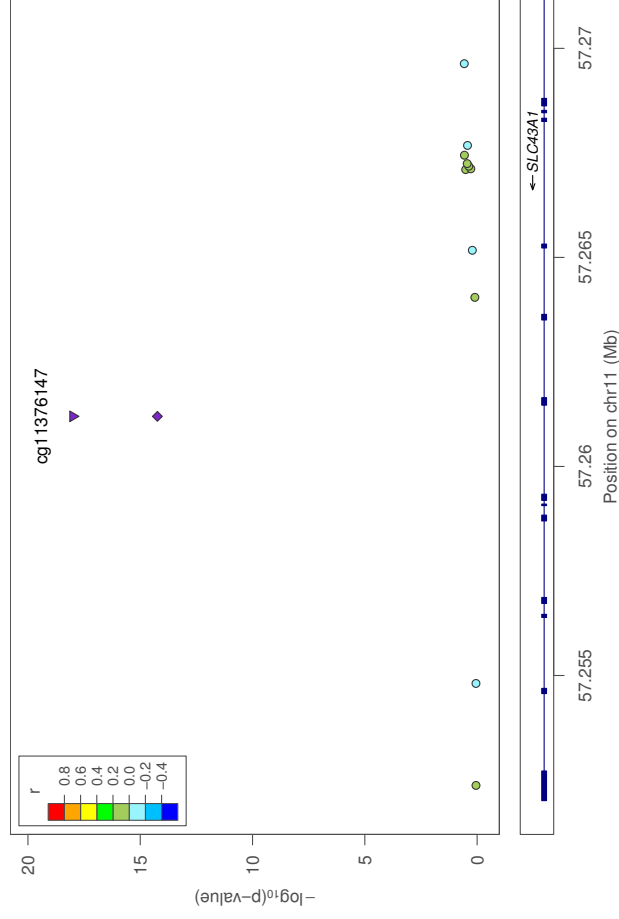

### BSCL2

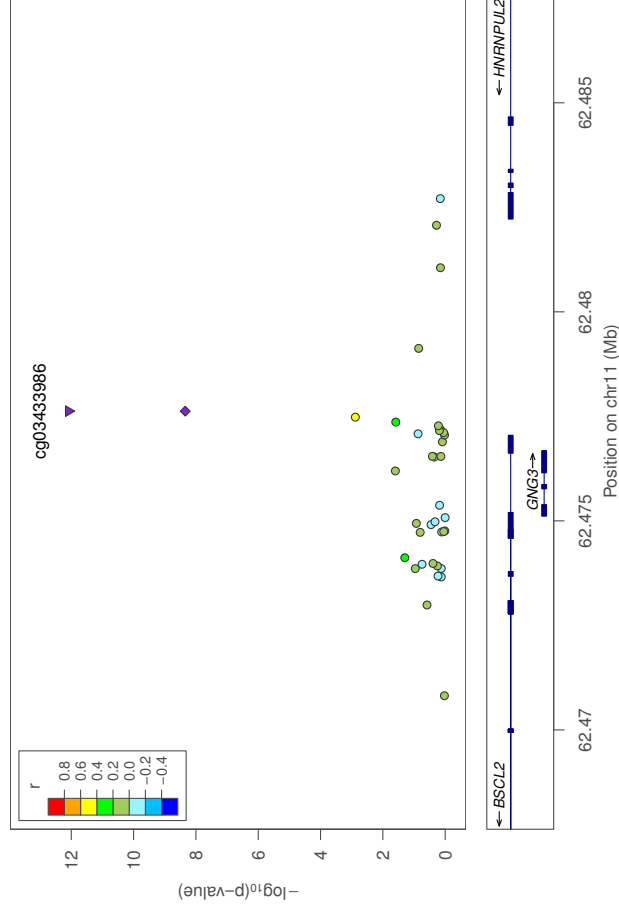

### CPT1A

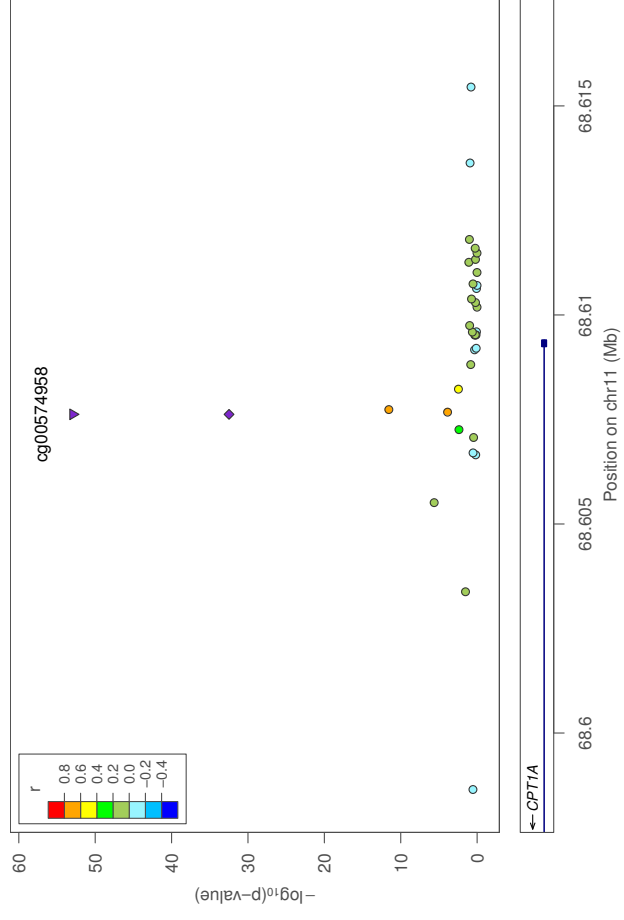

### BCO2

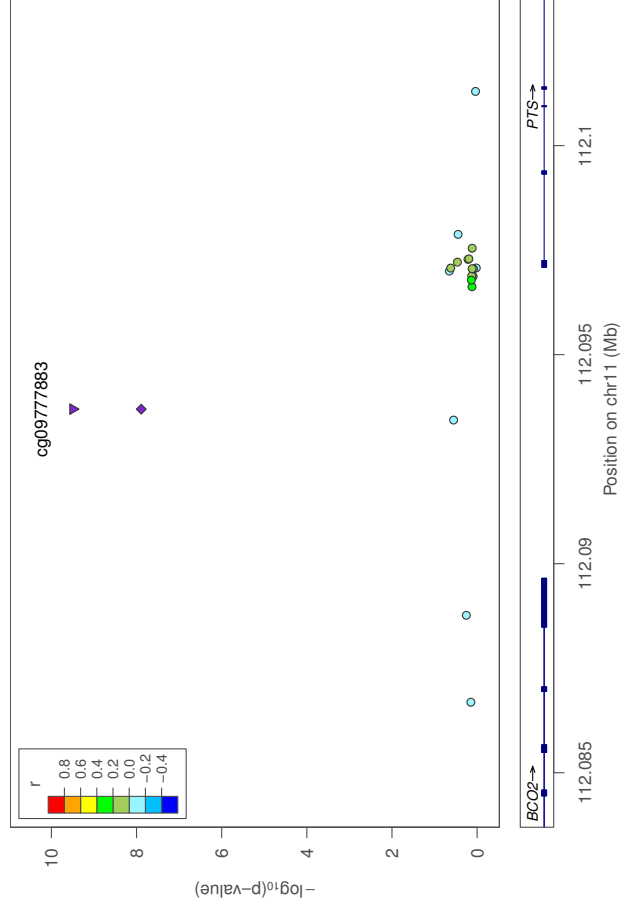

### BCL9L

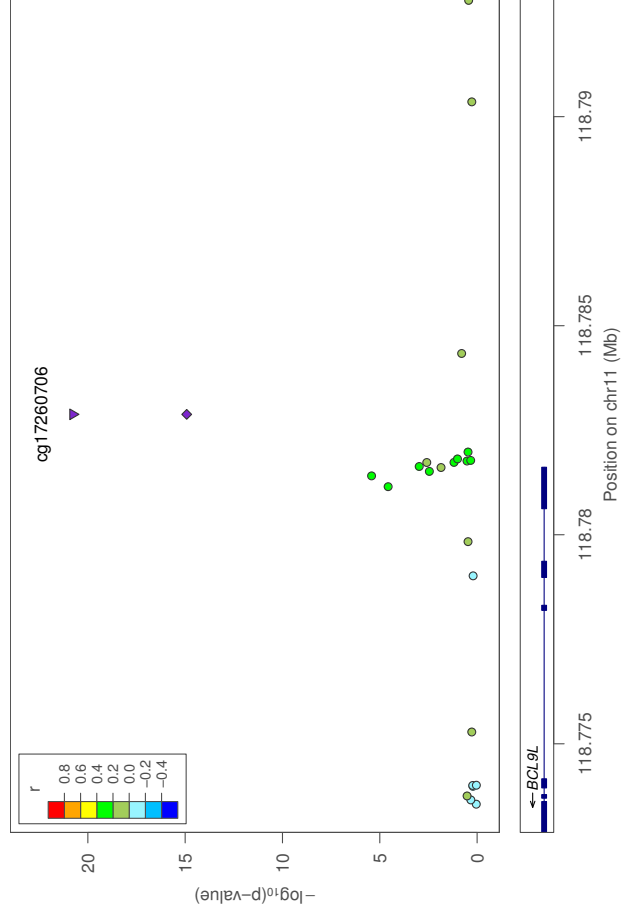

### CLMP

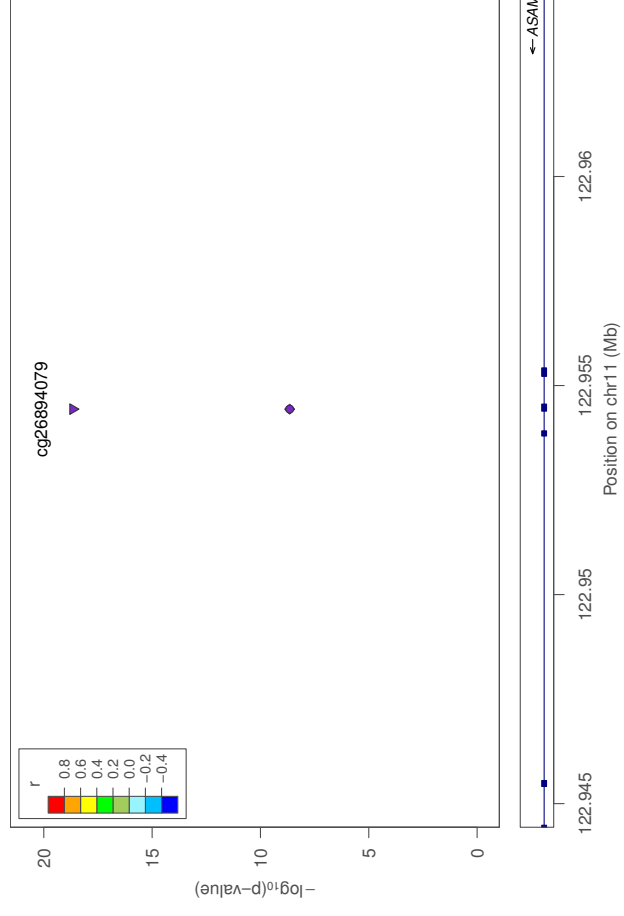

# PLBD1

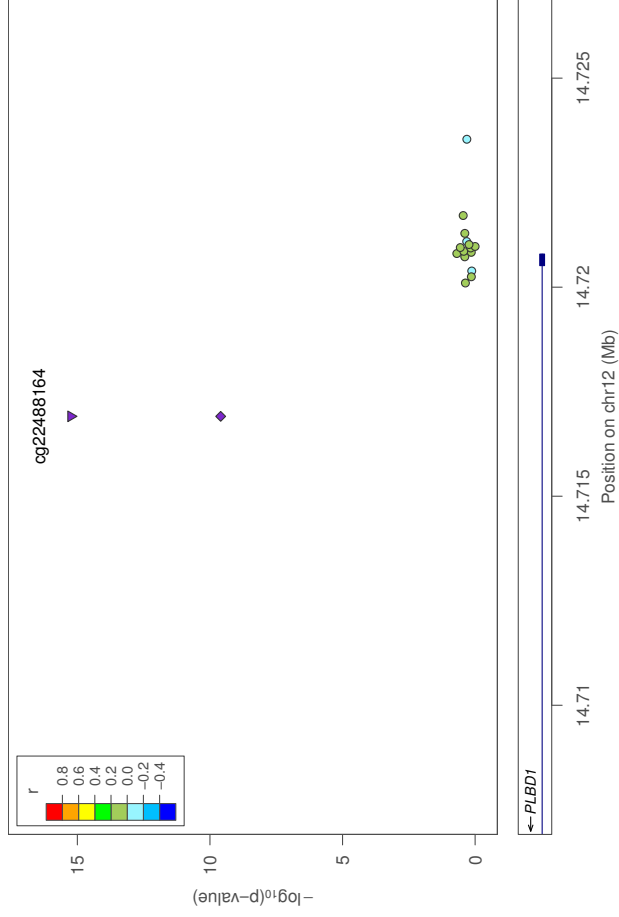

# CNTN1

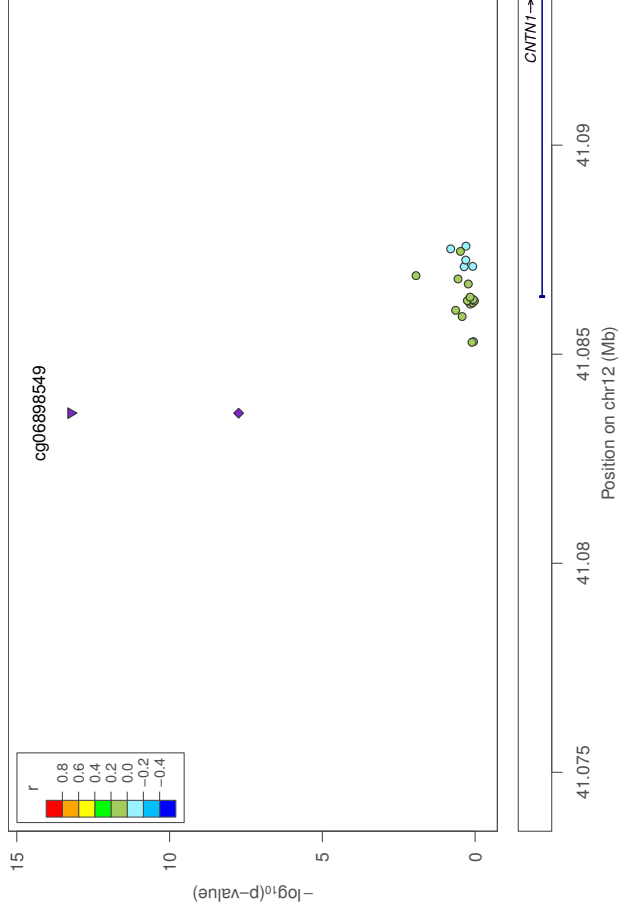

# IGFBP6

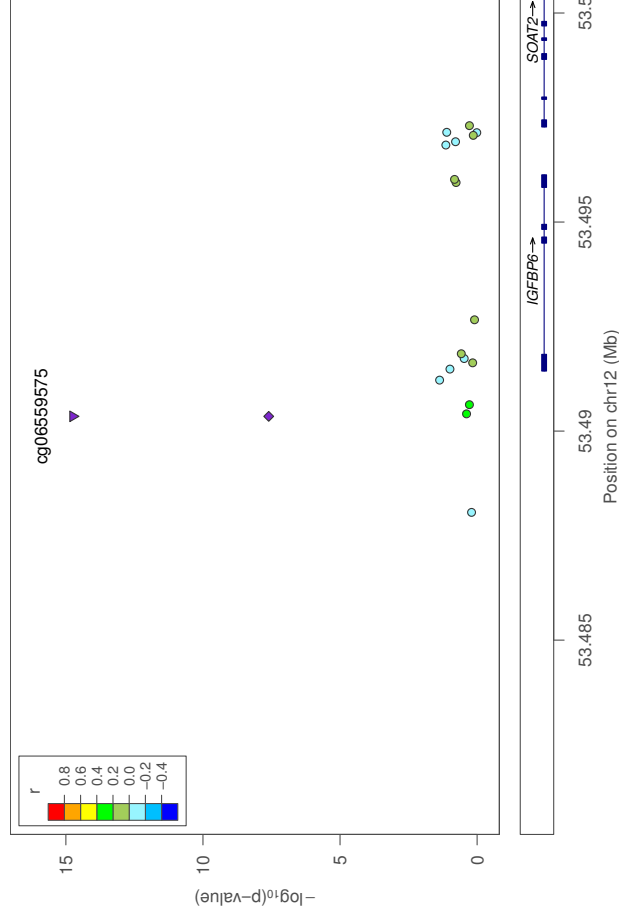

# DCN

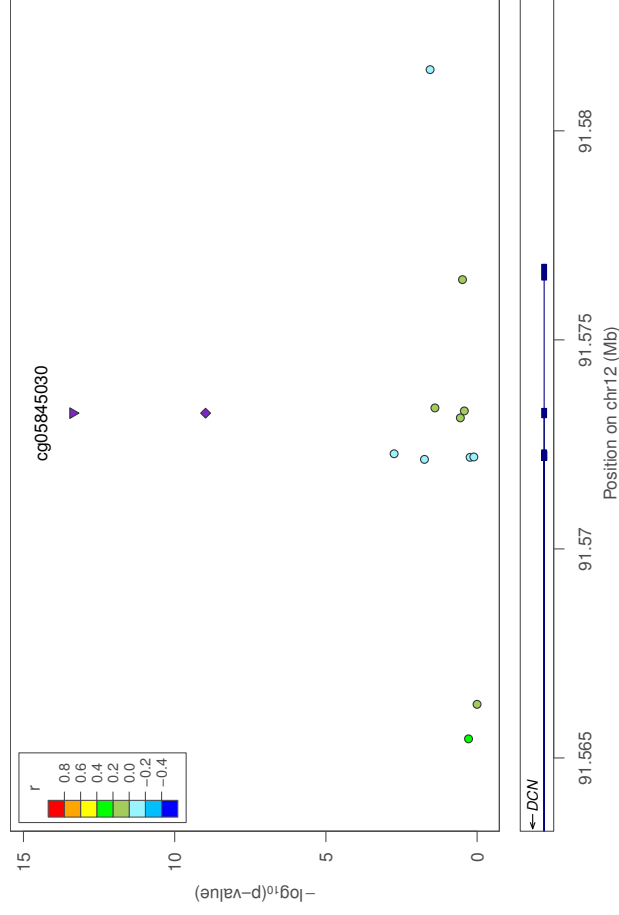

### DRAM1

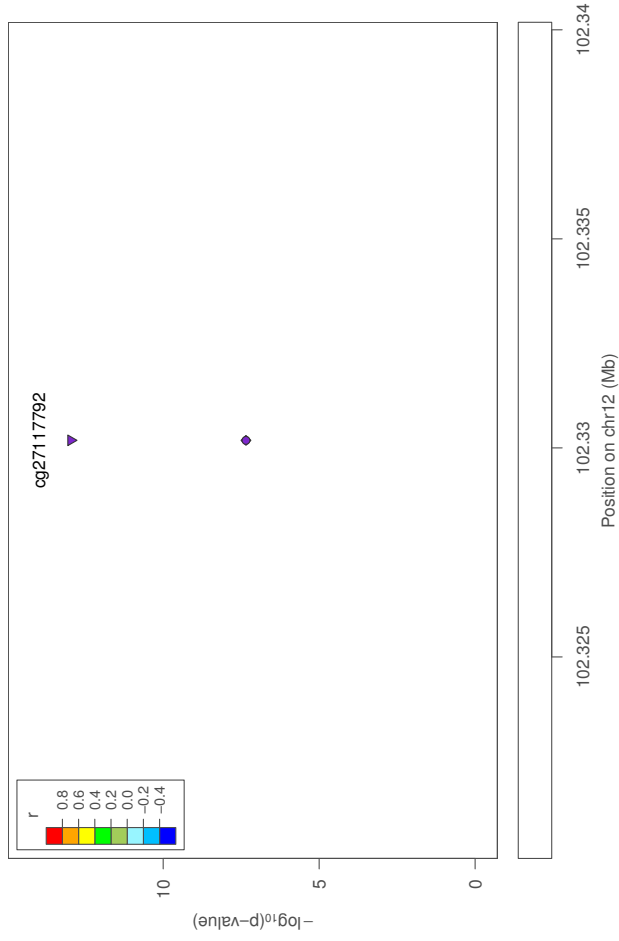

### UBE2L5P

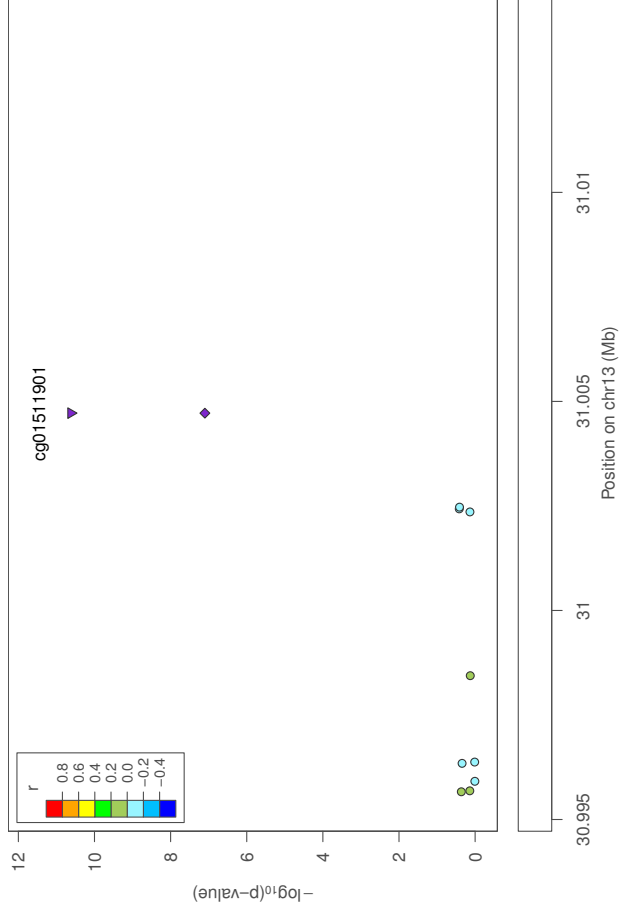

### UFM1

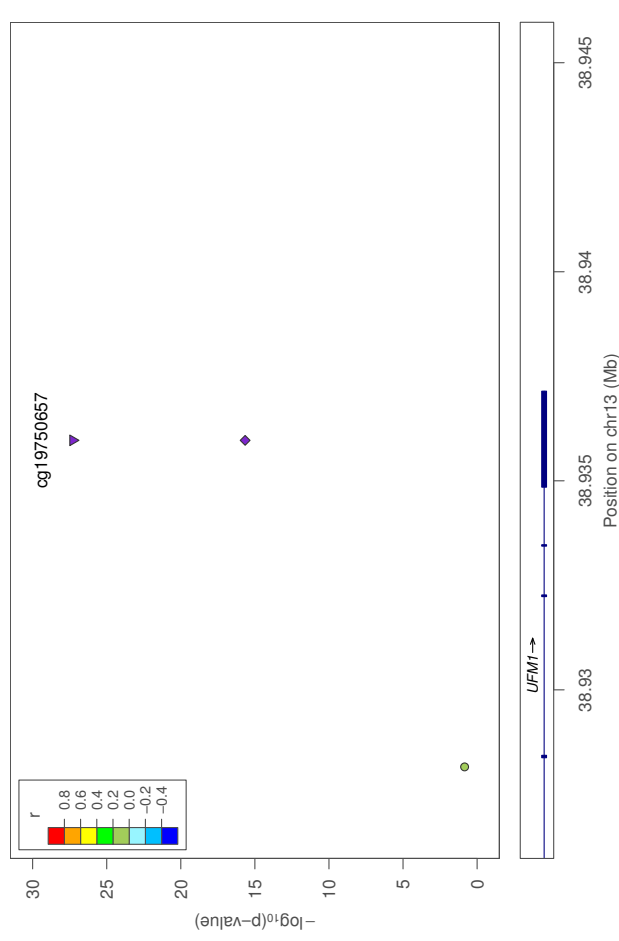

### LINC00598

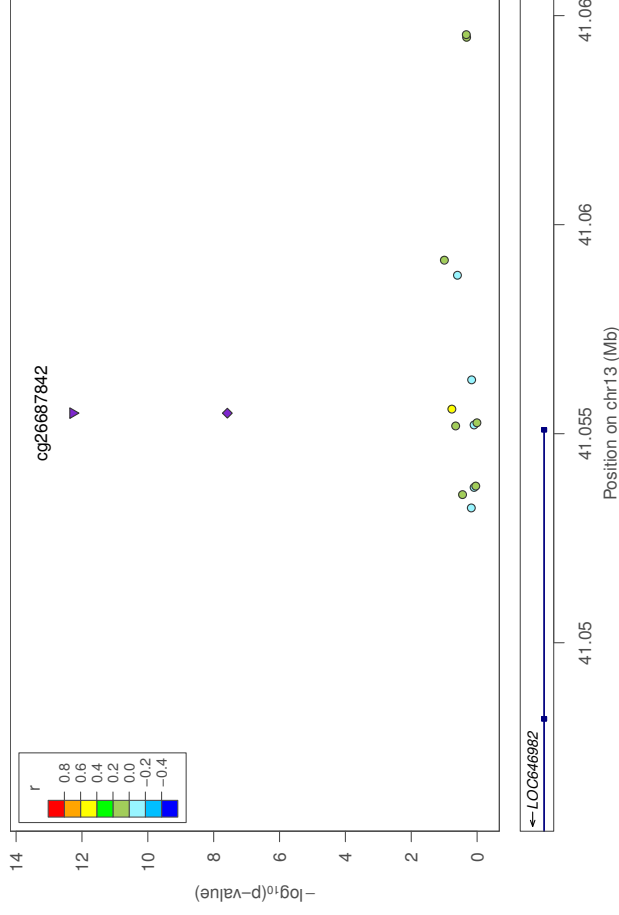

### SMIM2-AS1

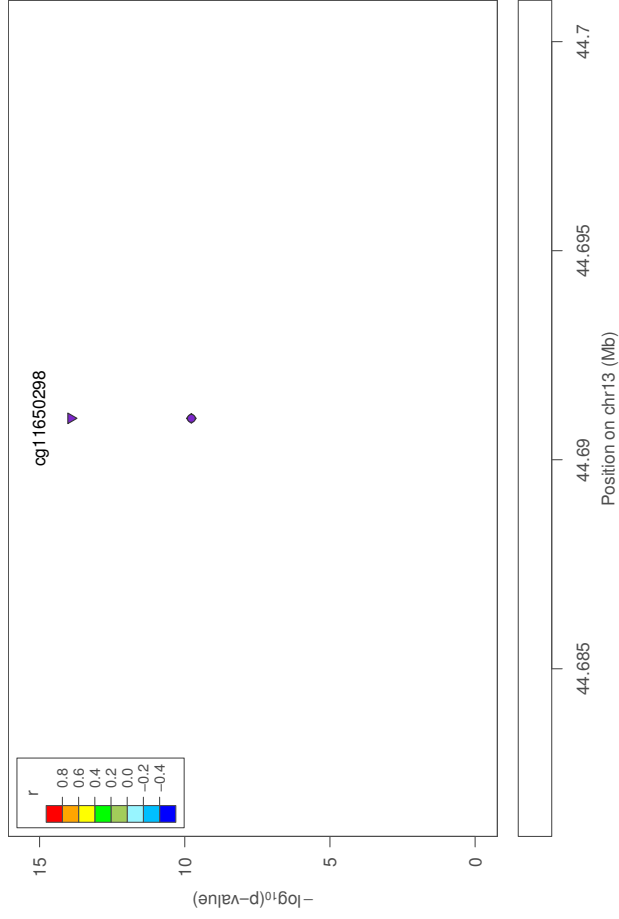

### RNASE10

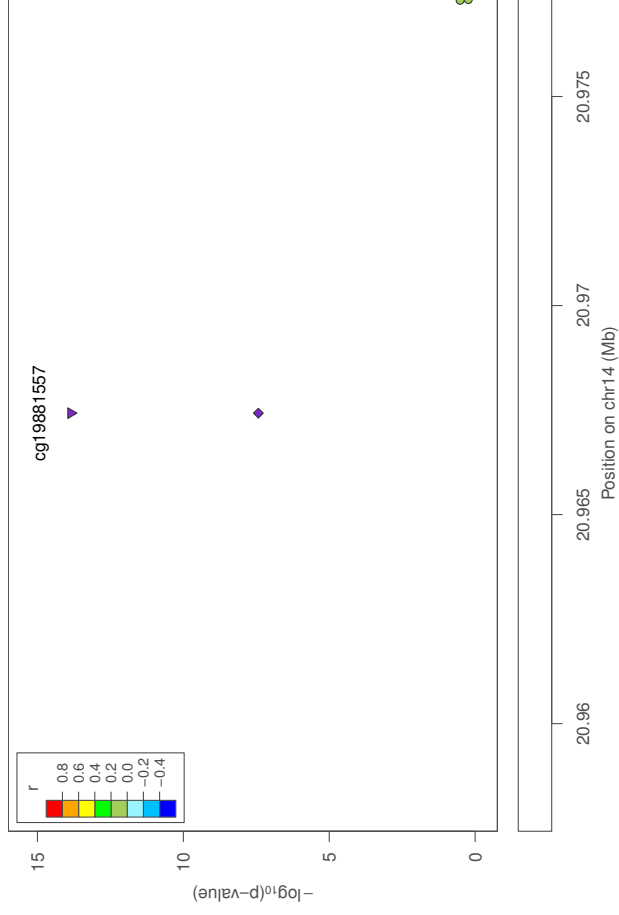

### CPNE6

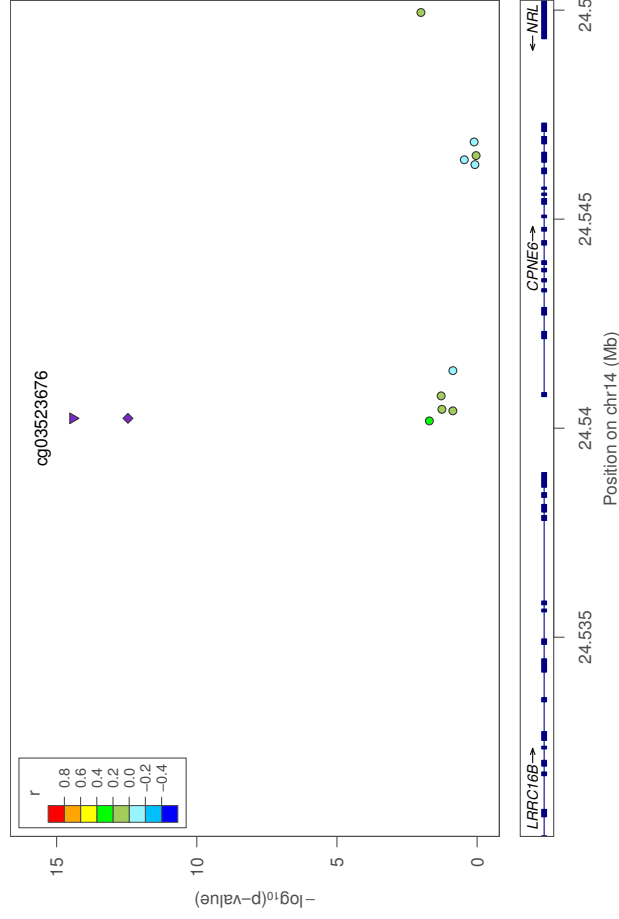

### RPL10L

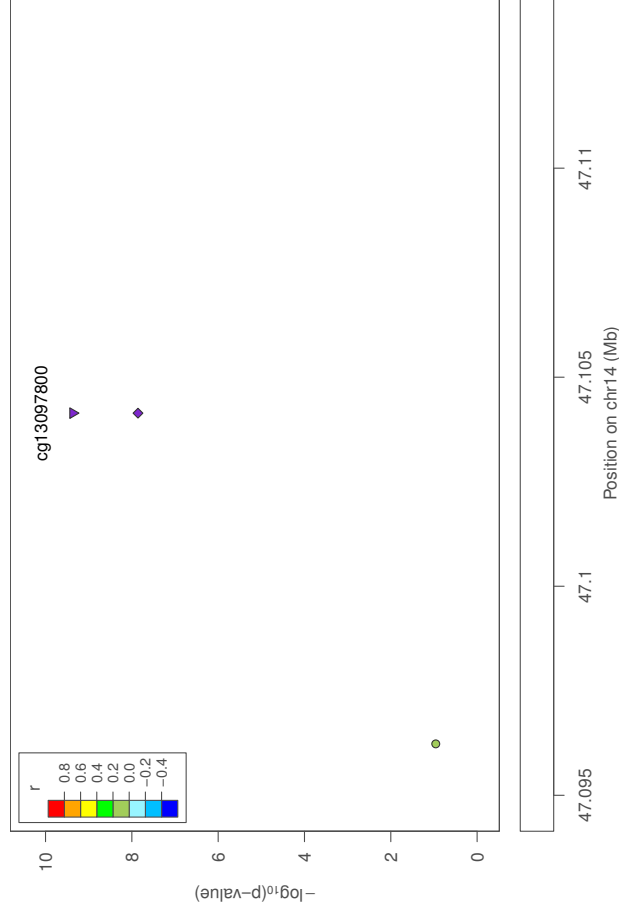



## HSPA2

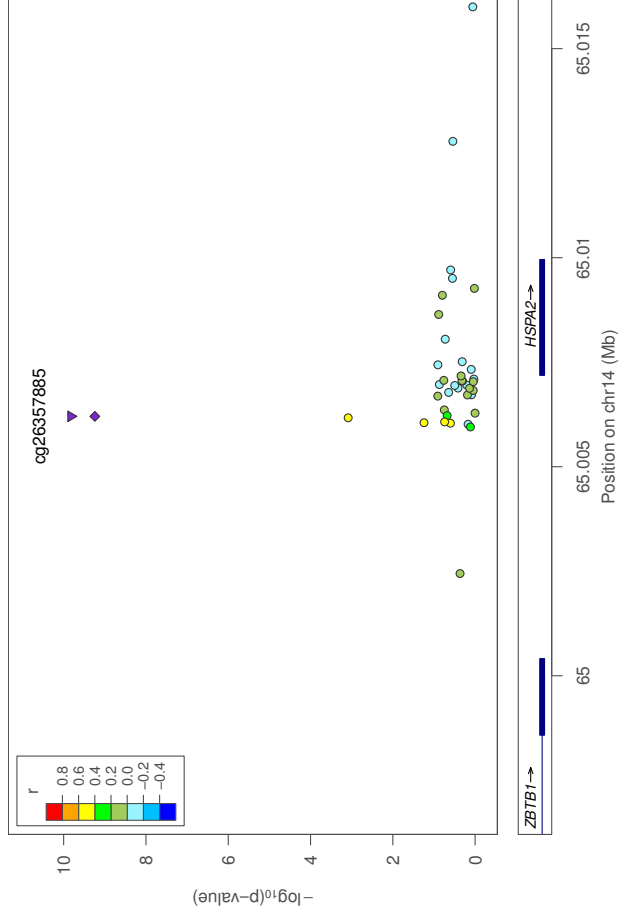

## ELMSAN1

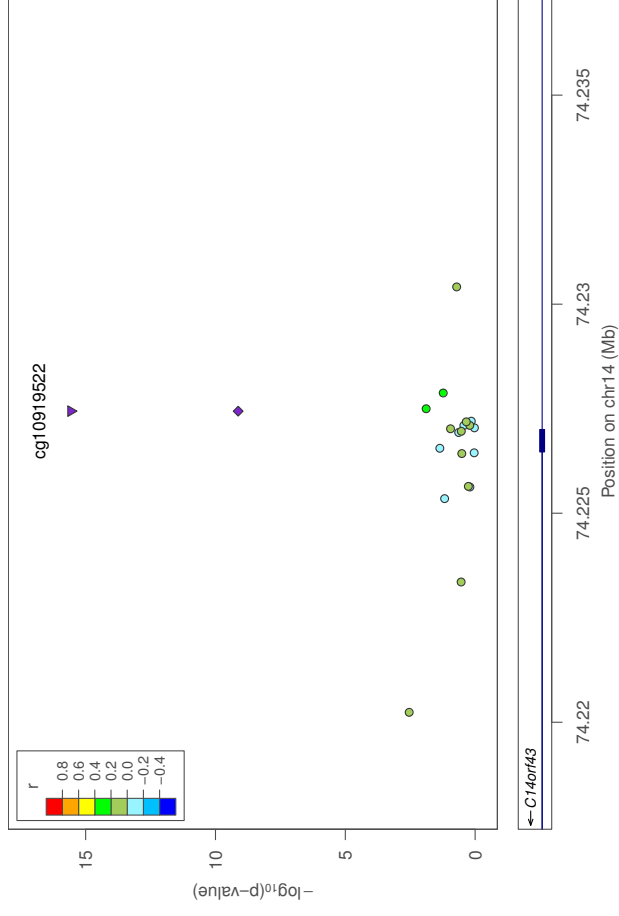

## ZC3H14

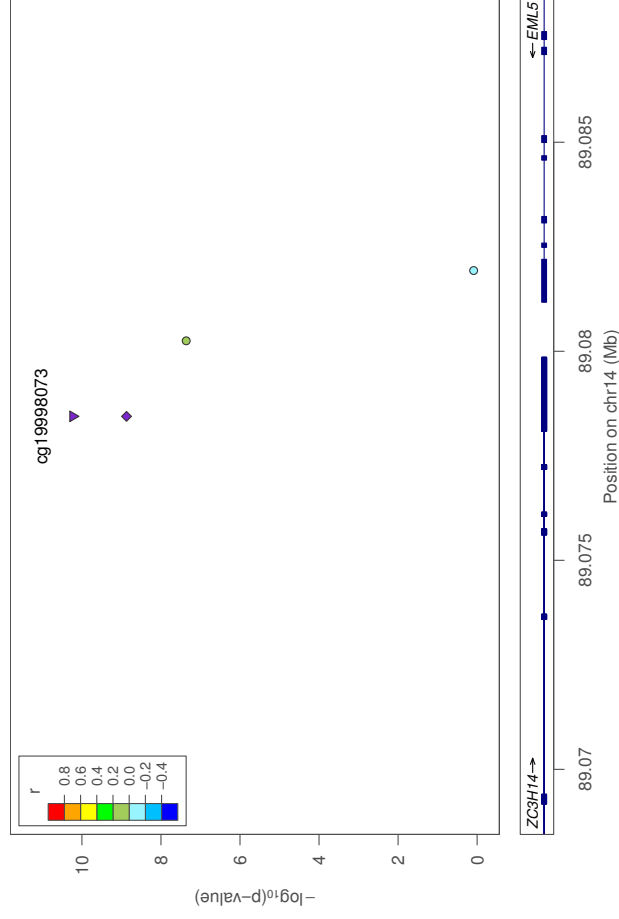

## GPR68

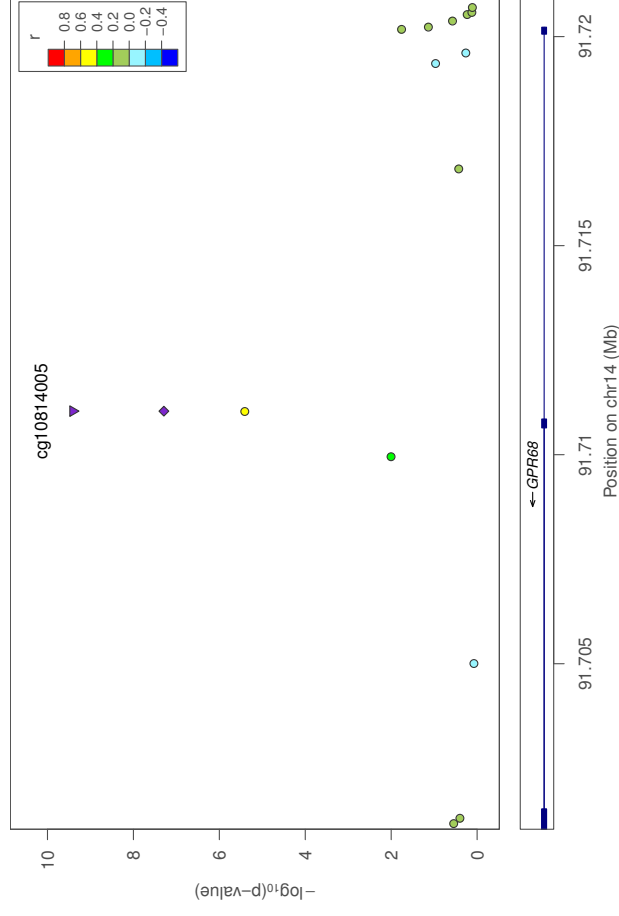

# IGHA2

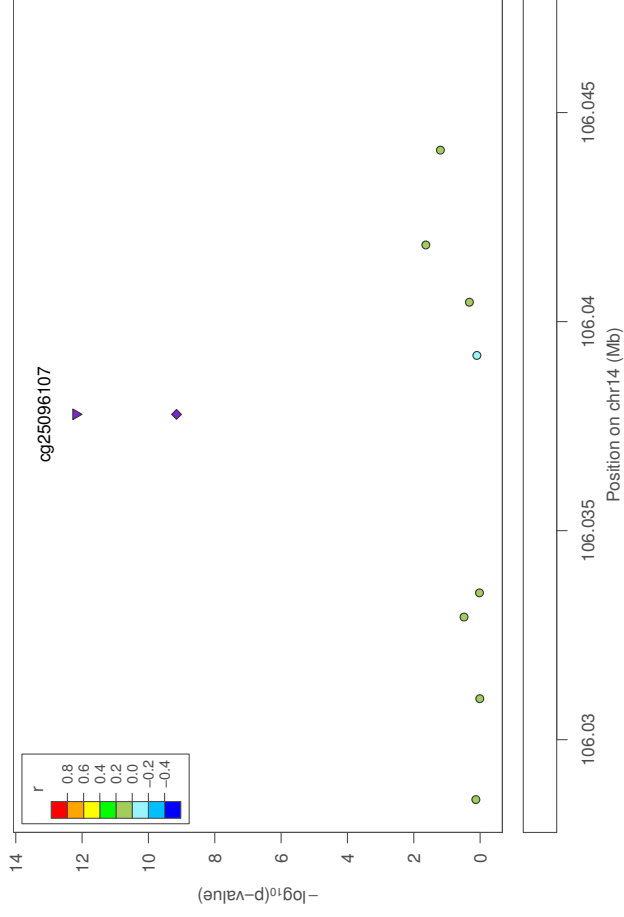

# ATP10A

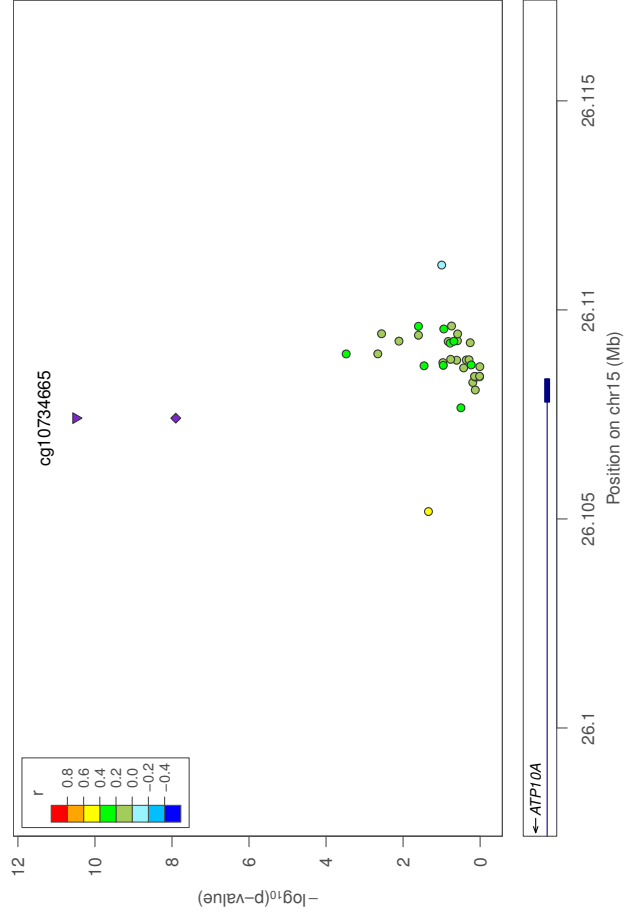

# APBA2

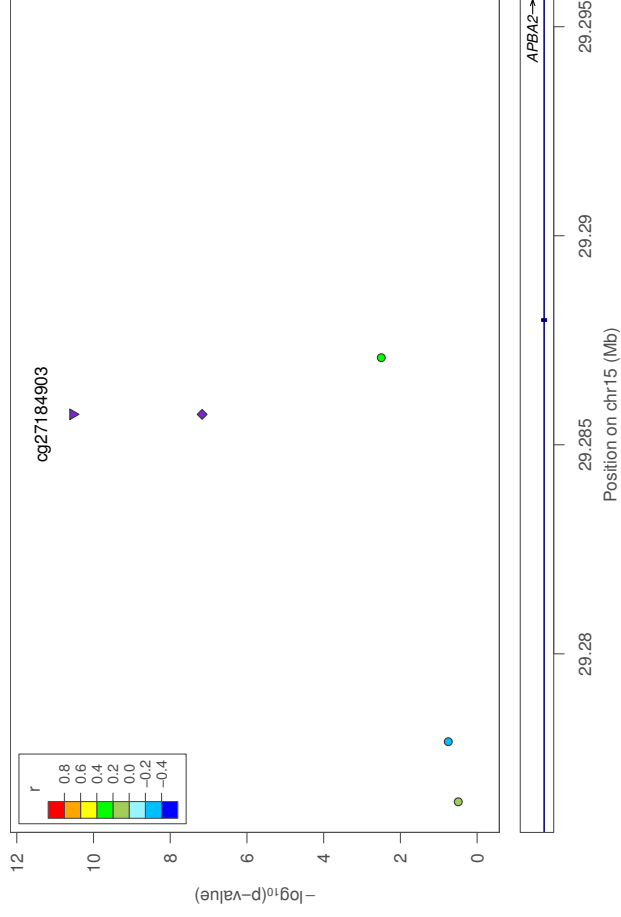

# MYO5C

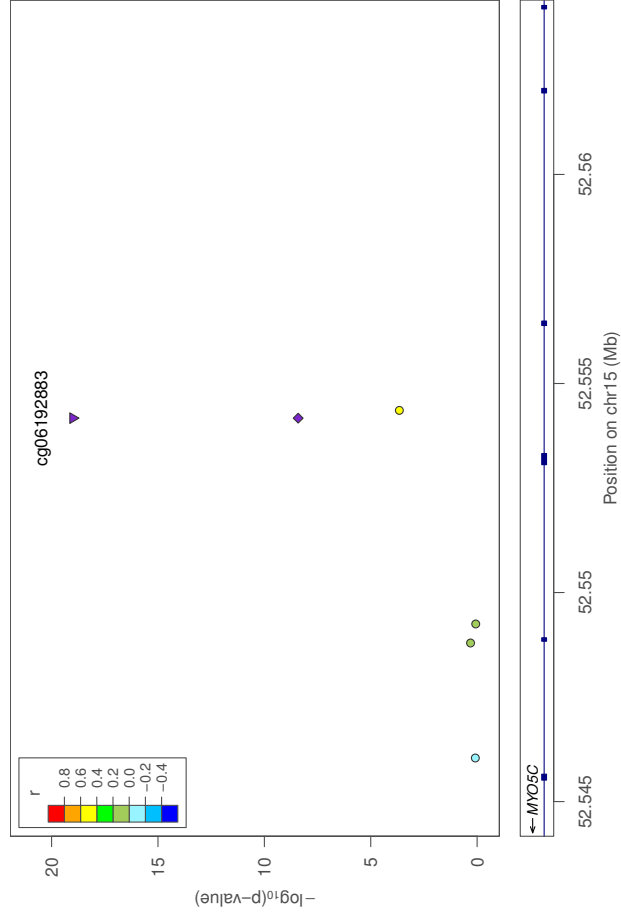

## DAPK2

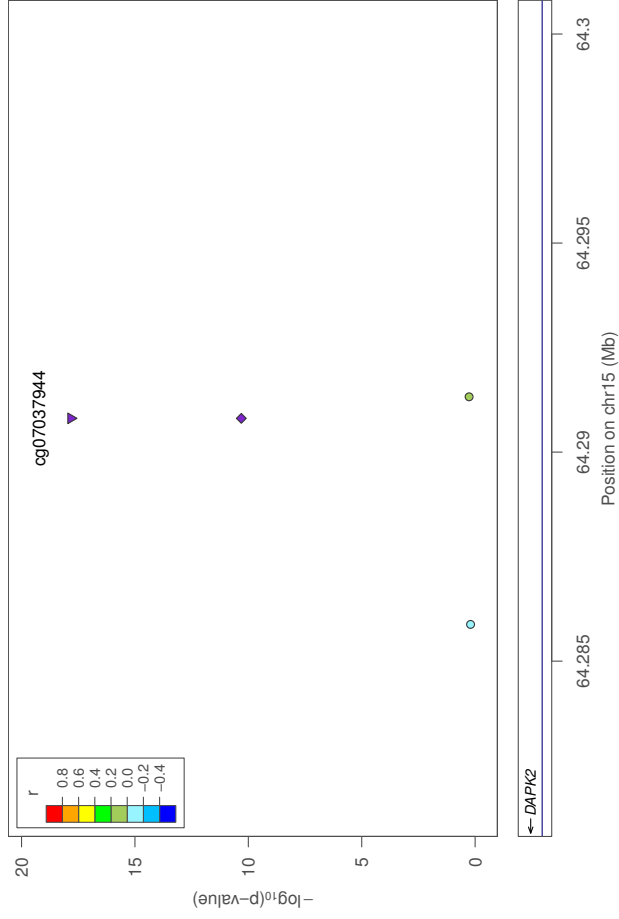

## ACSBG1

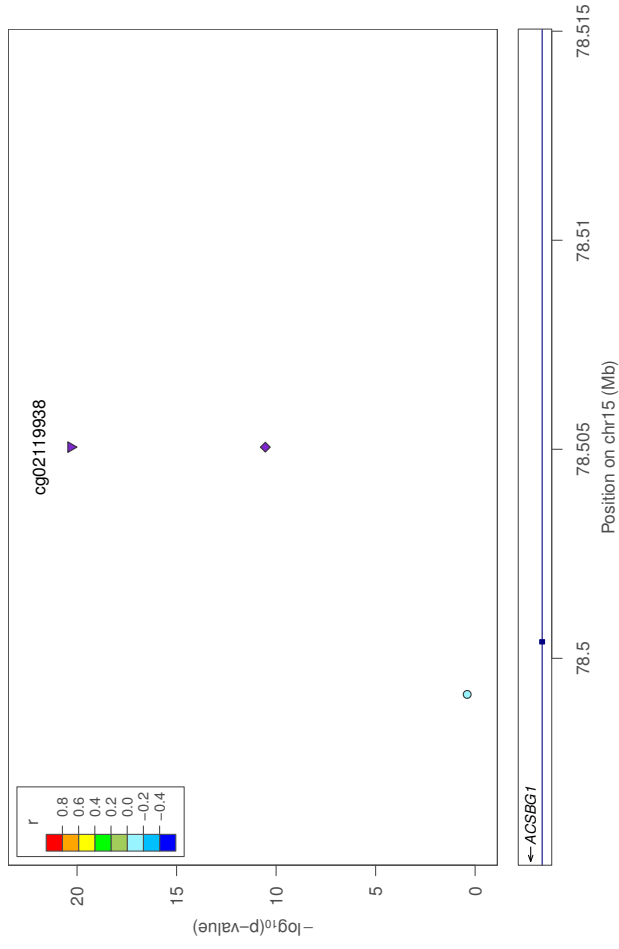

## FSD2

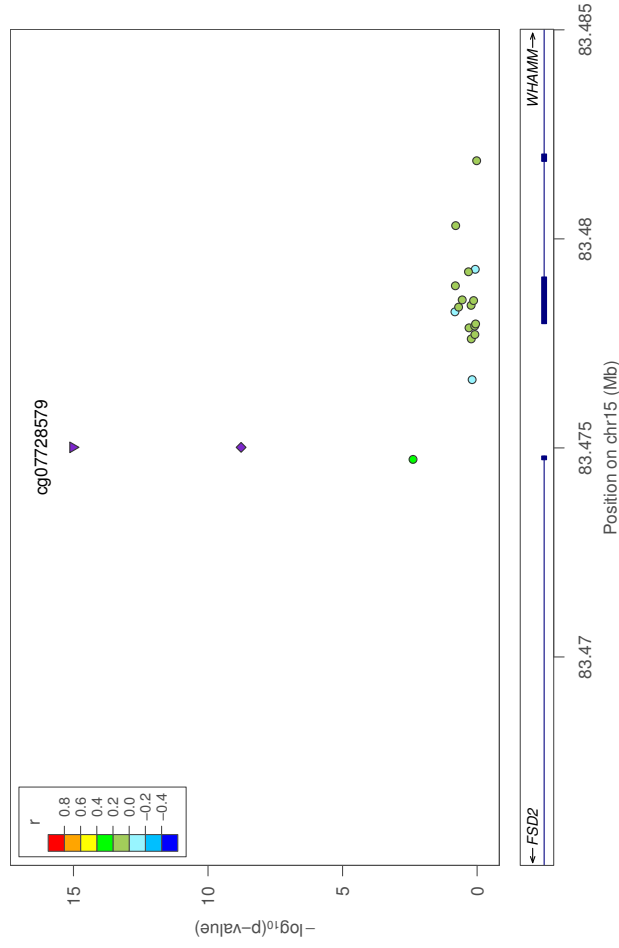

## MAN2A2

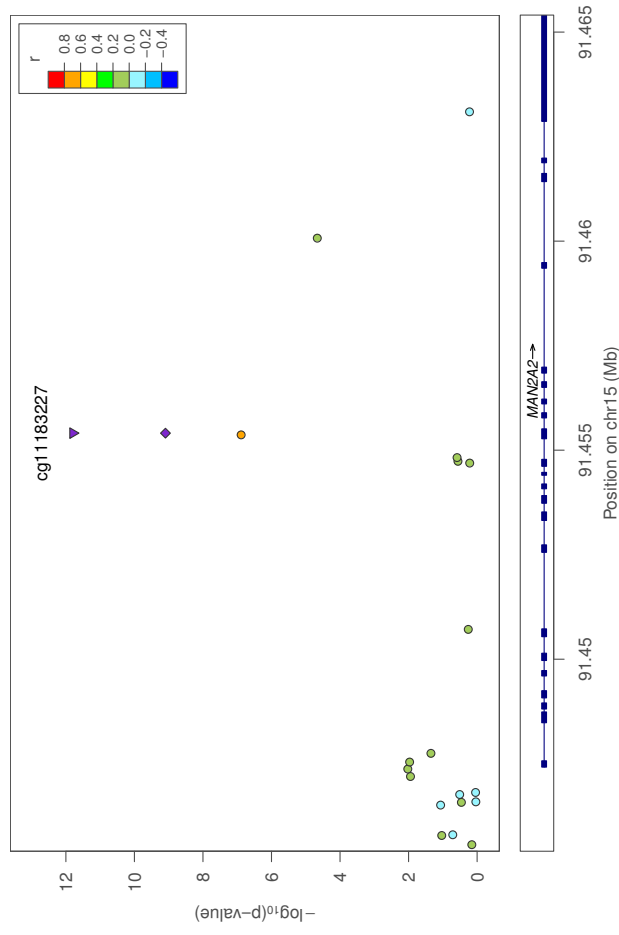

# SLCO3A1

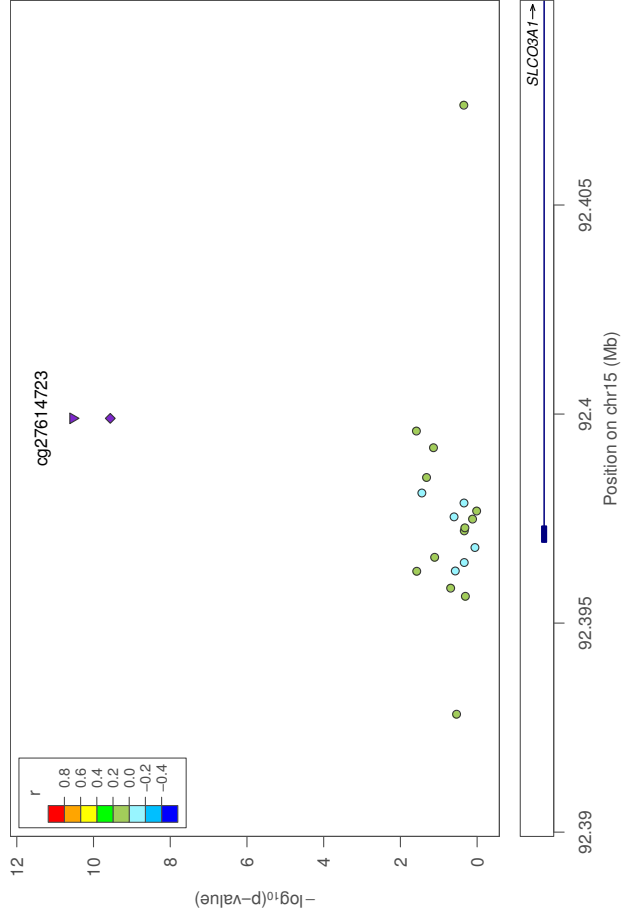

# AXIN1

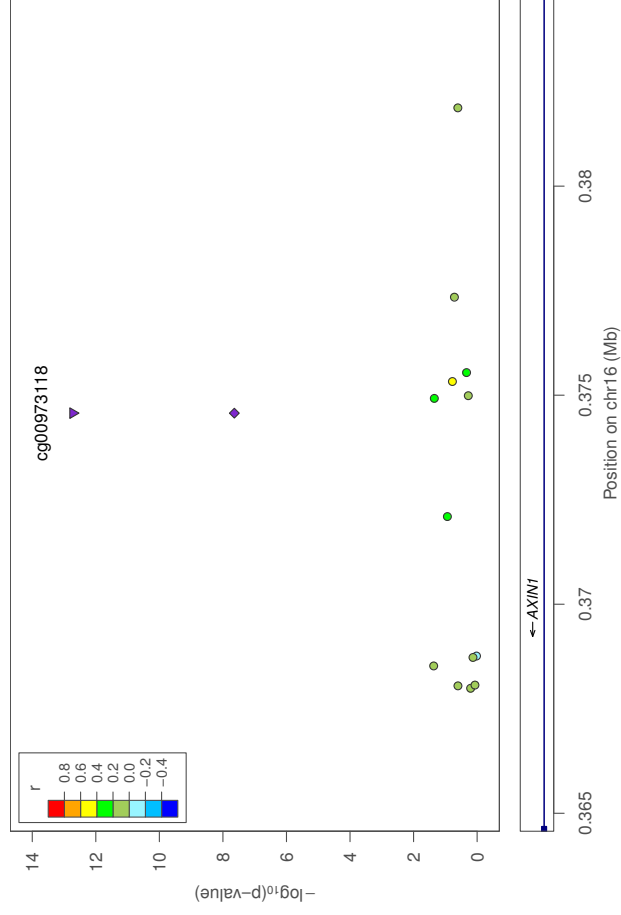

# SLC9A3R2

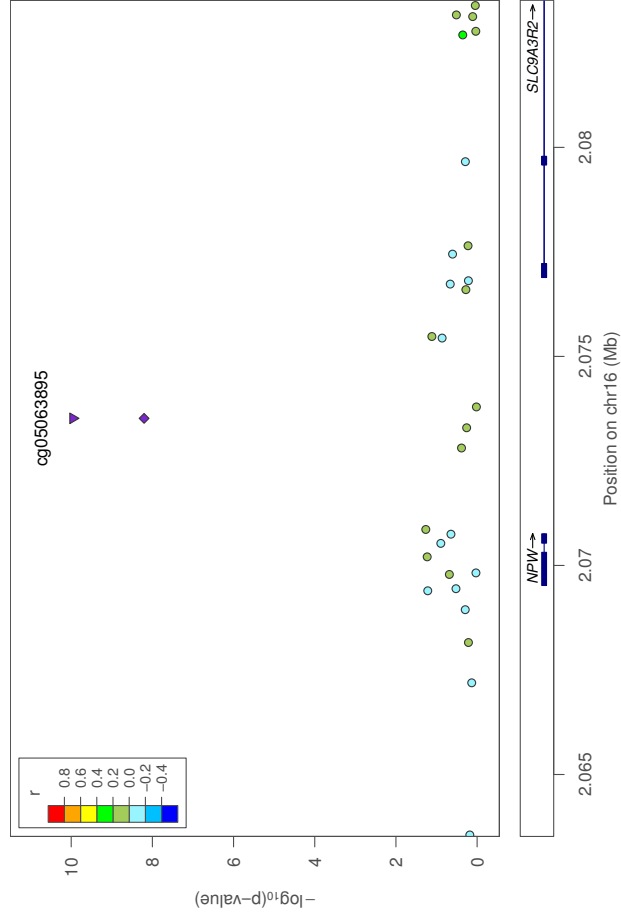

# RMI2

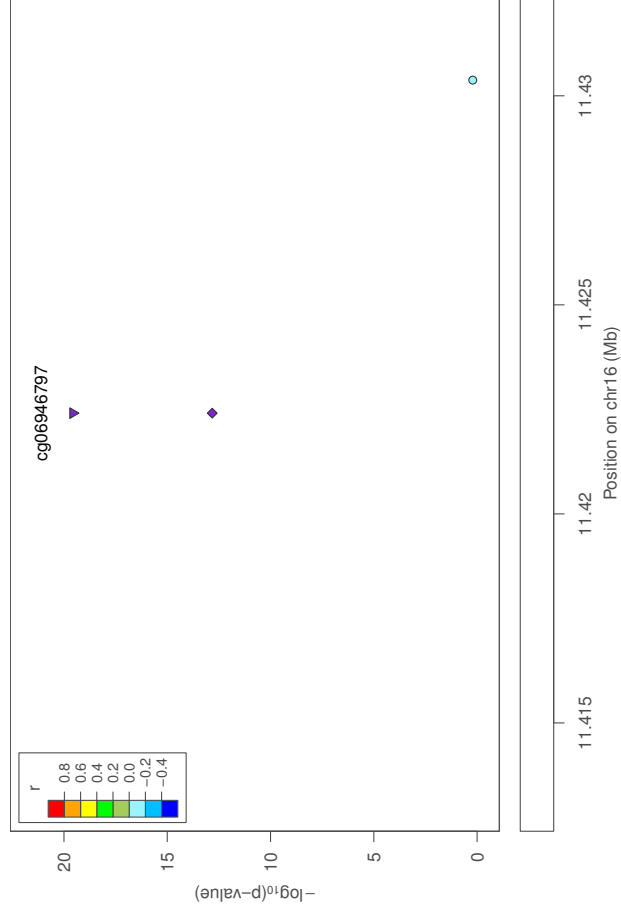

### NFATC2IP

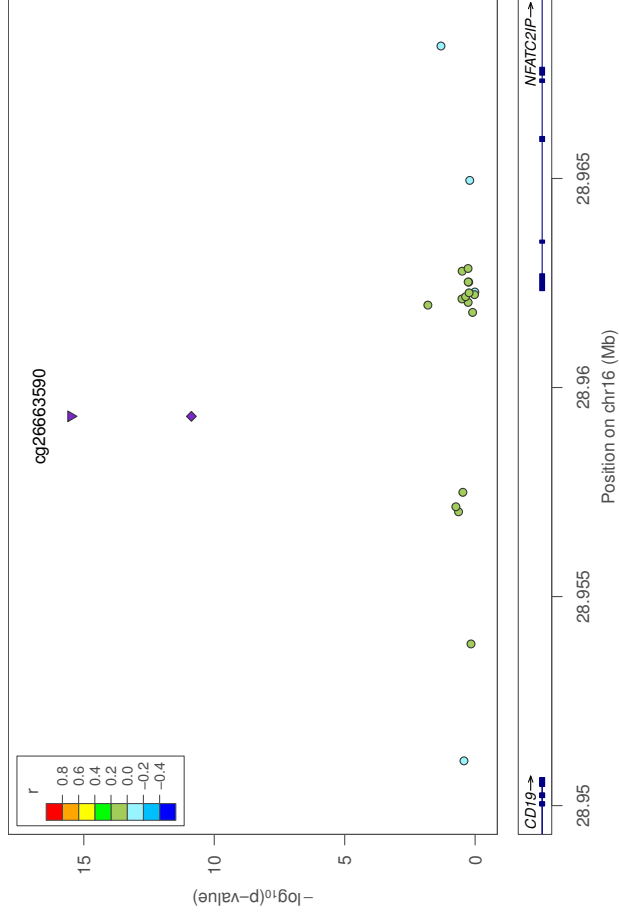

### ZNF48

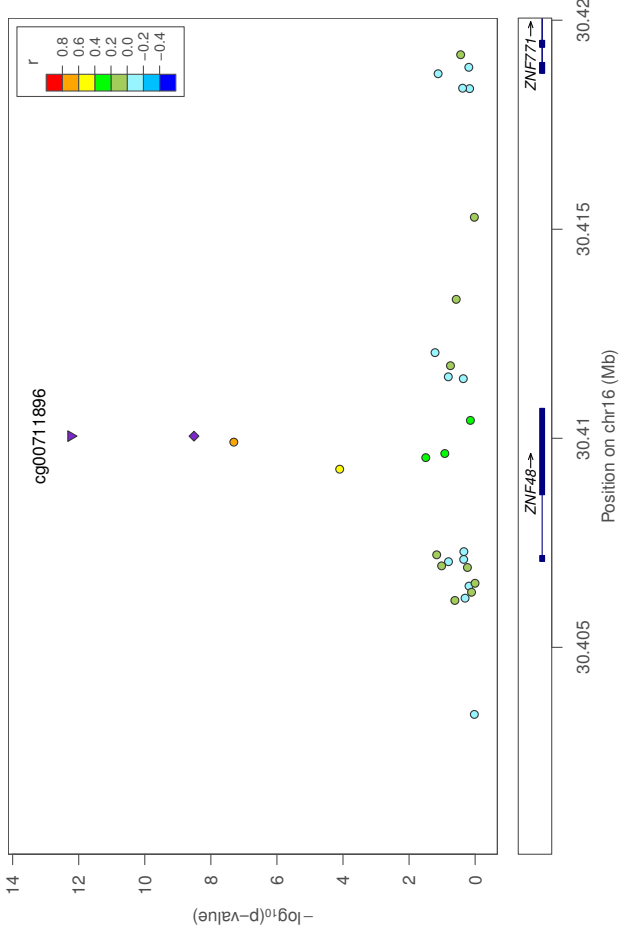

### NOD2

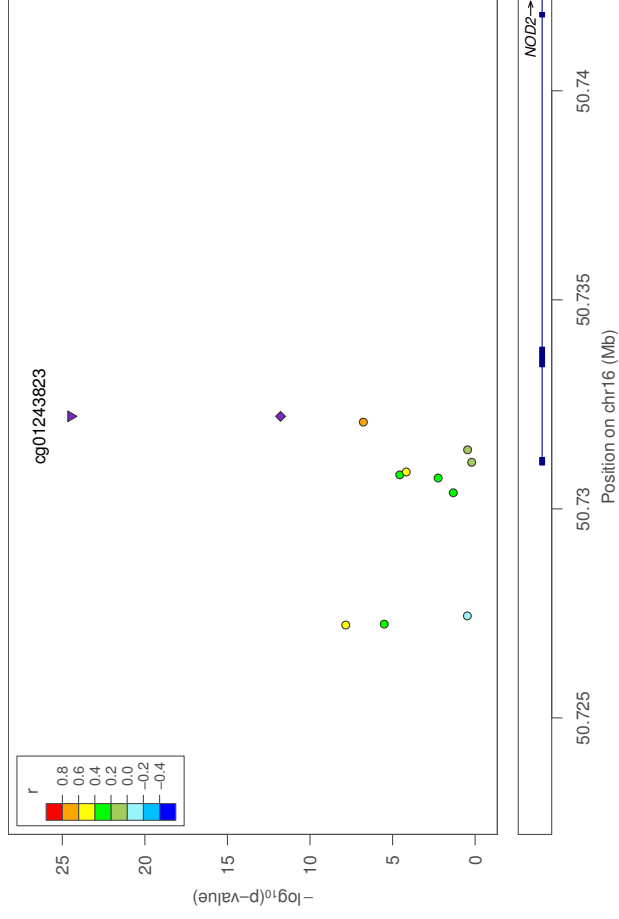

### BBS2

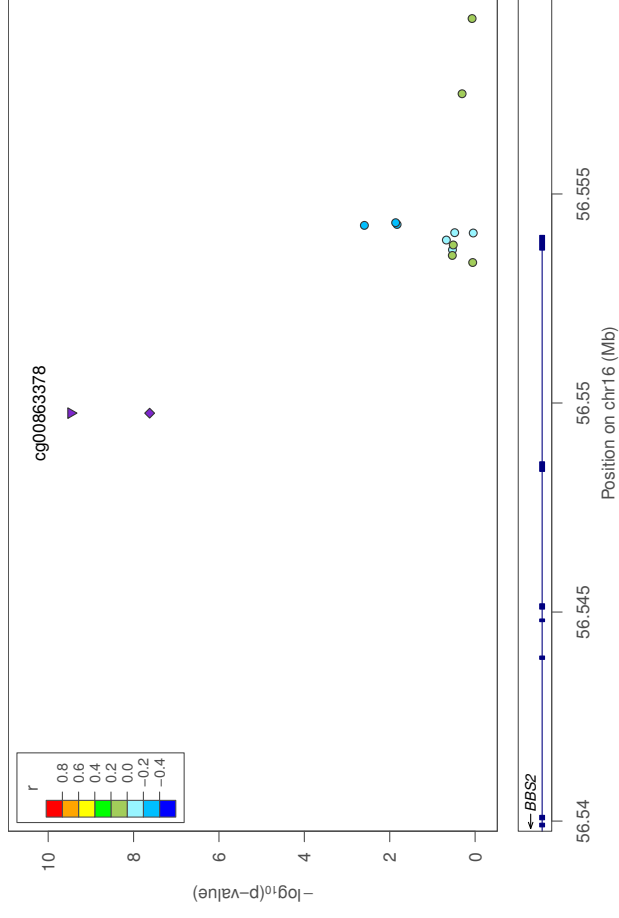

## DUS2L

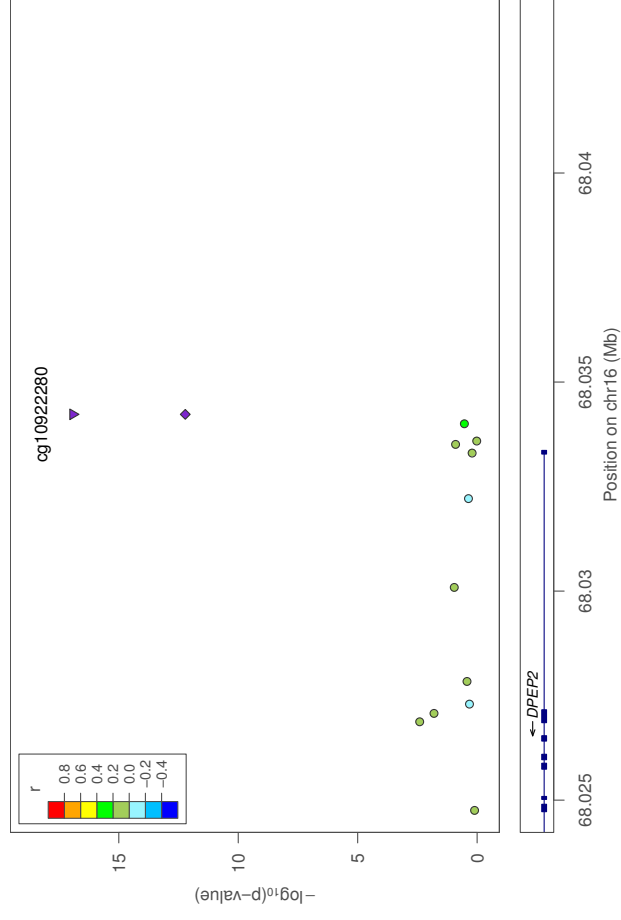

## MAF

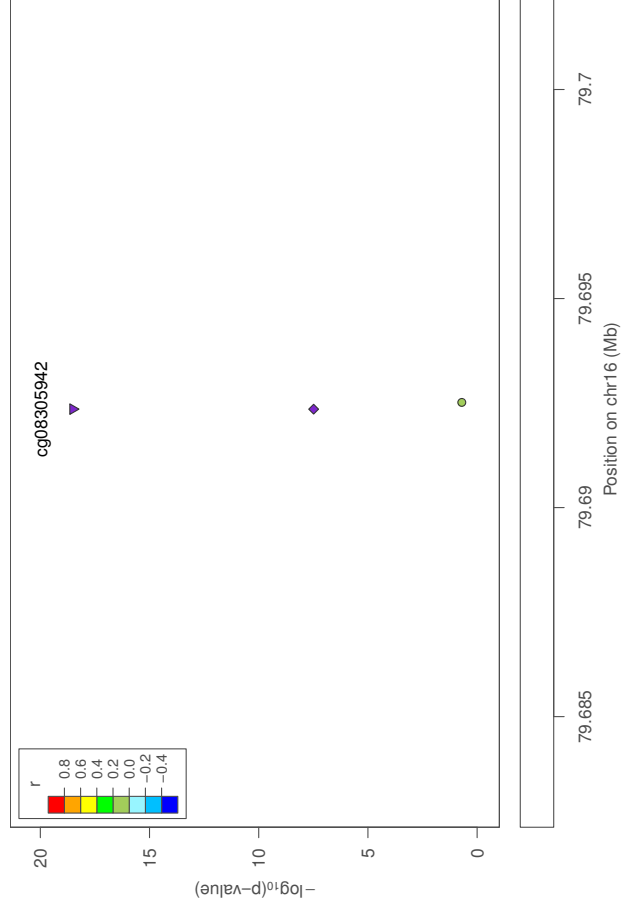

## GSE1

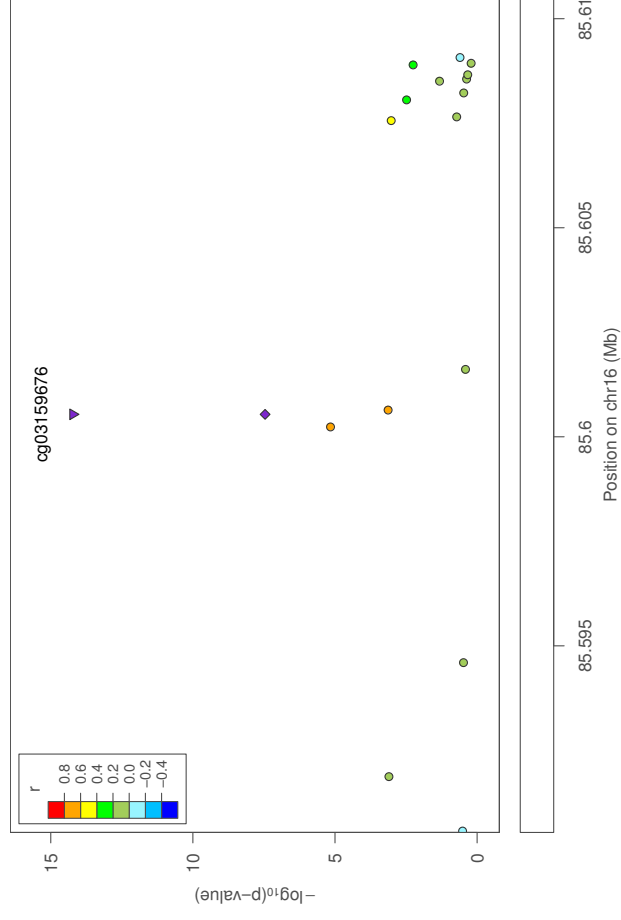

## SLC7A5

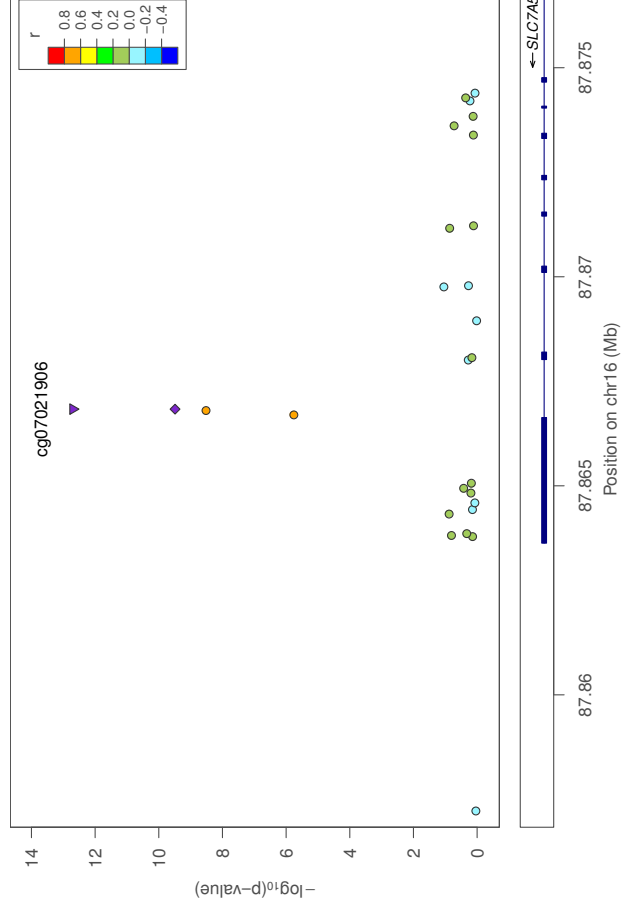

### CBFA2T3

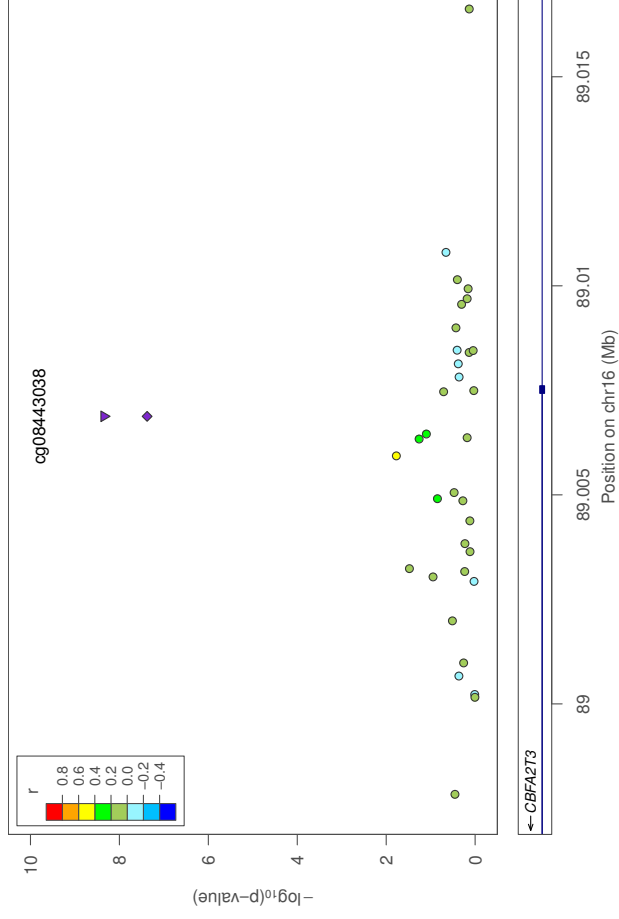

### ANKRD11

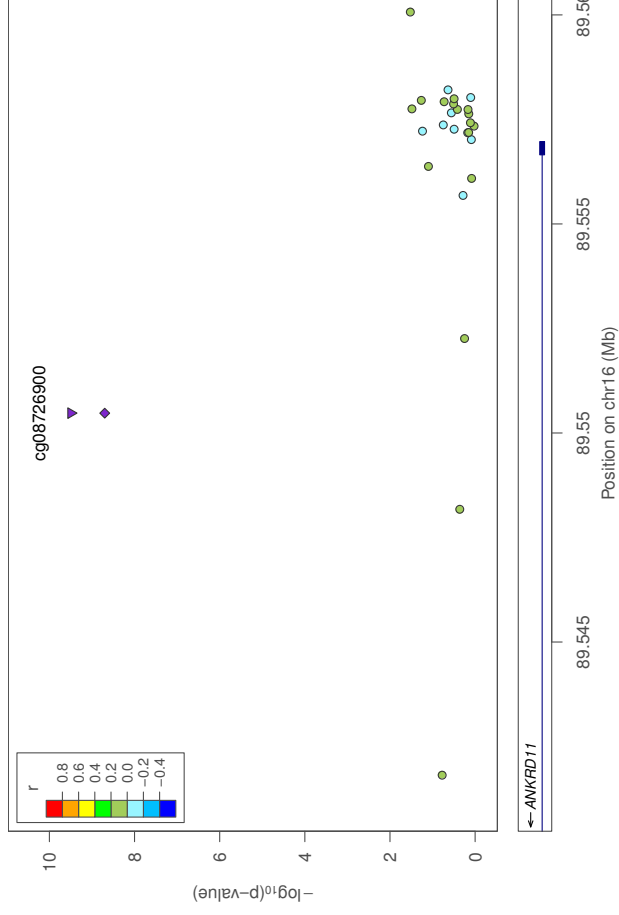

### CLUH

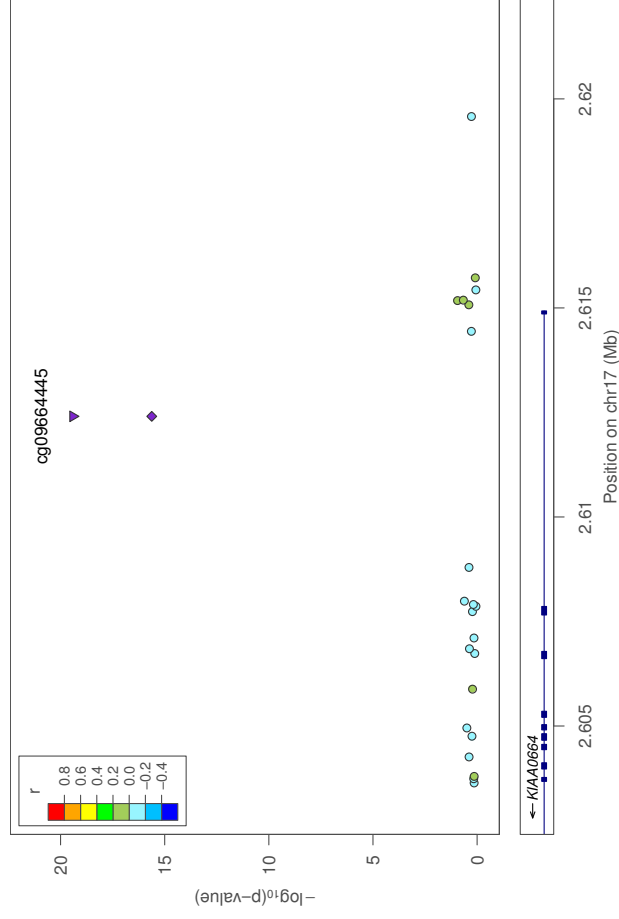

### ZZEF1

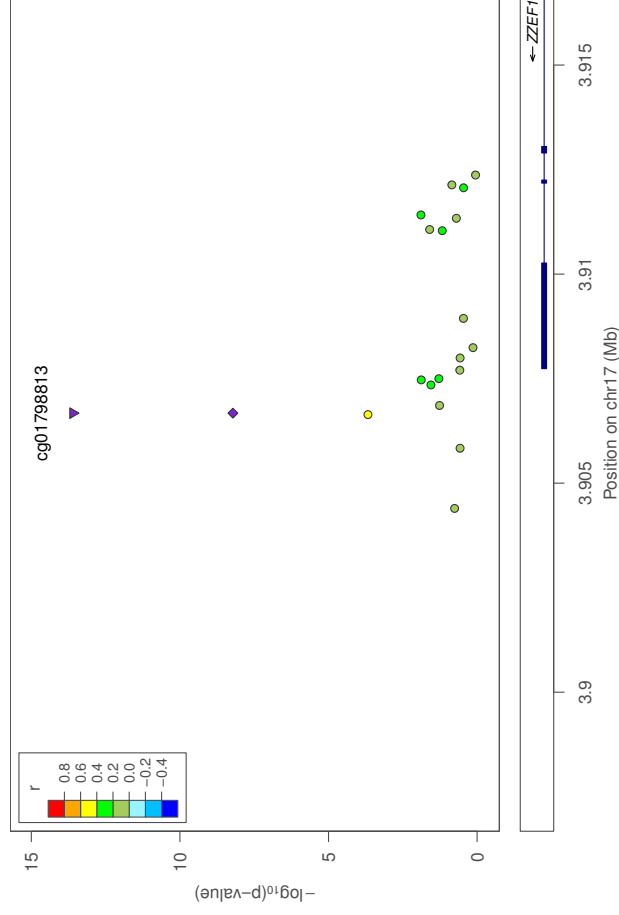

### ACADVL

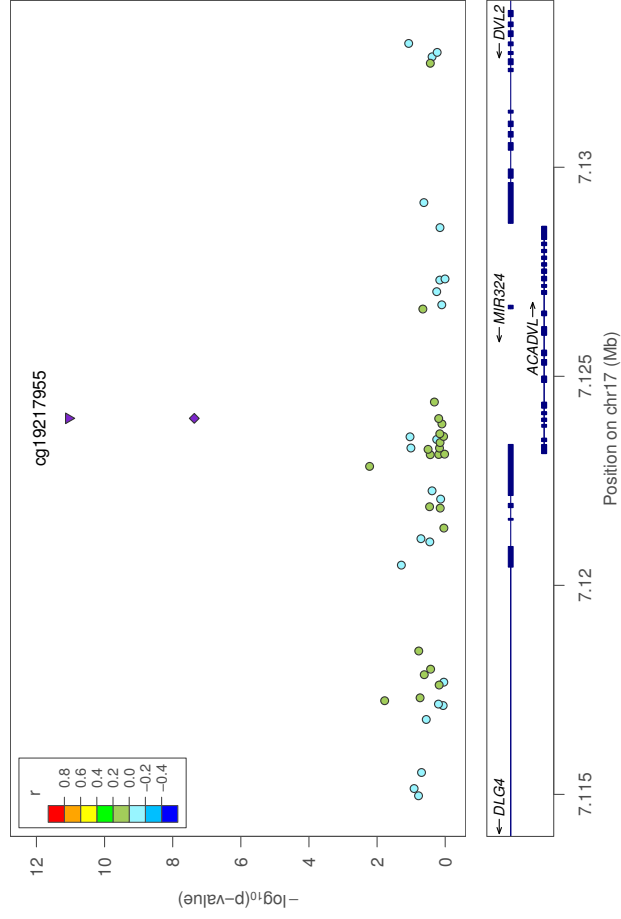

### CHD3

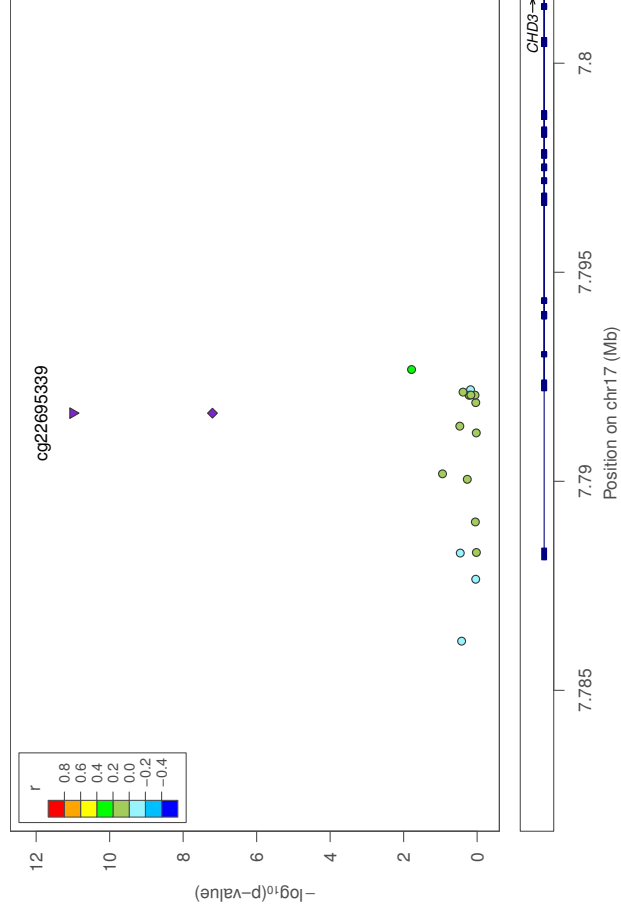

### SREBF1

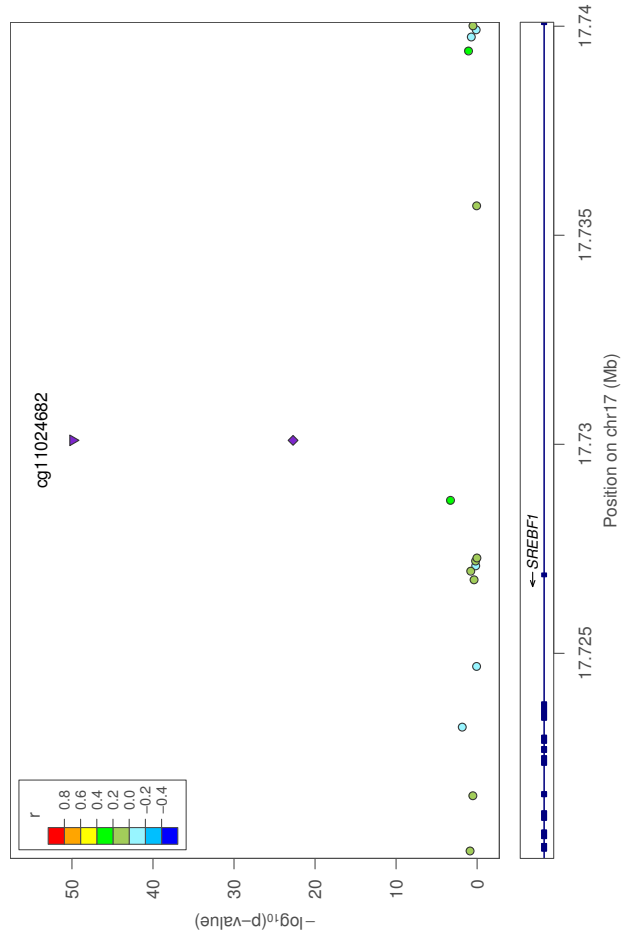

### AKAP10

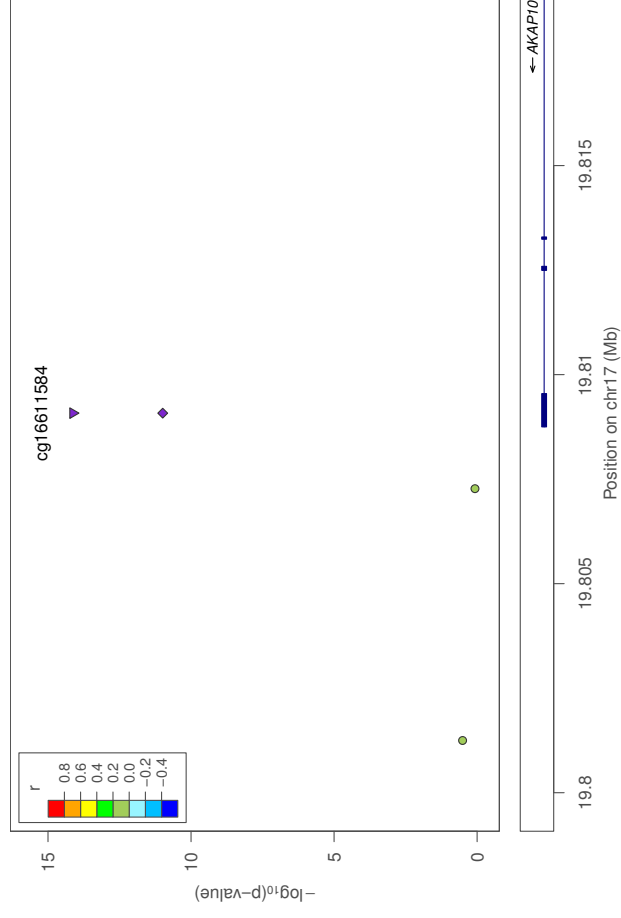



## USP22

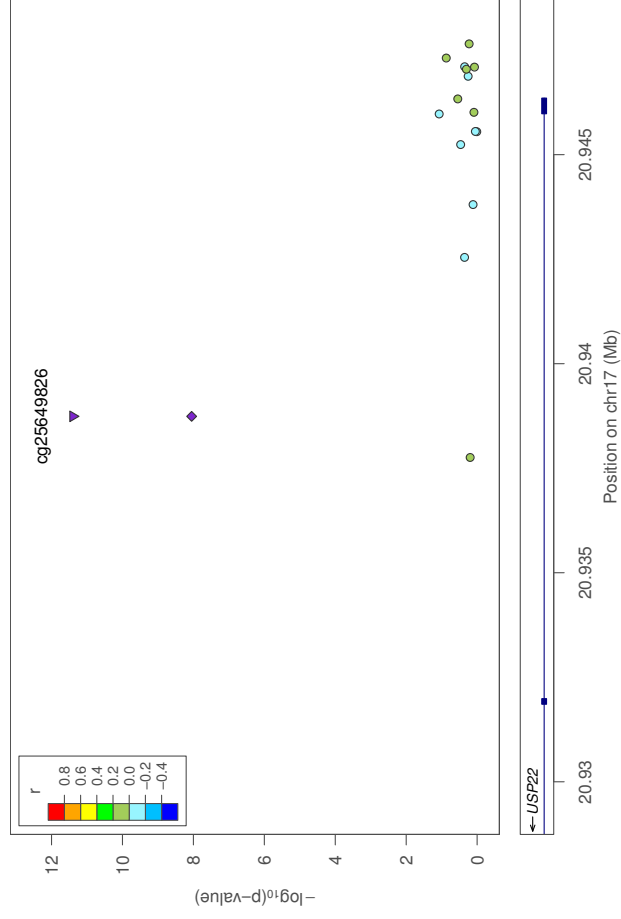

## RARA

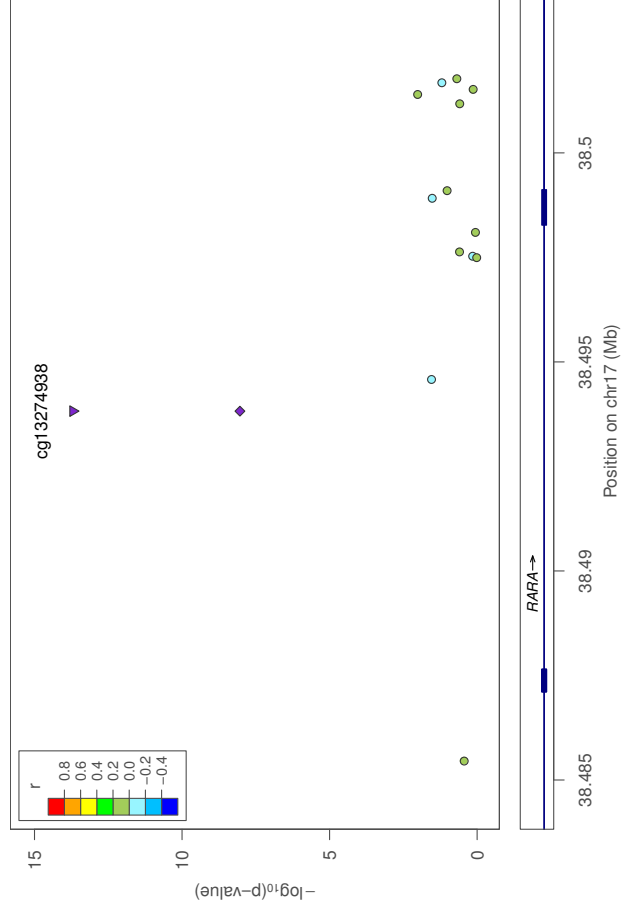

## VPS25

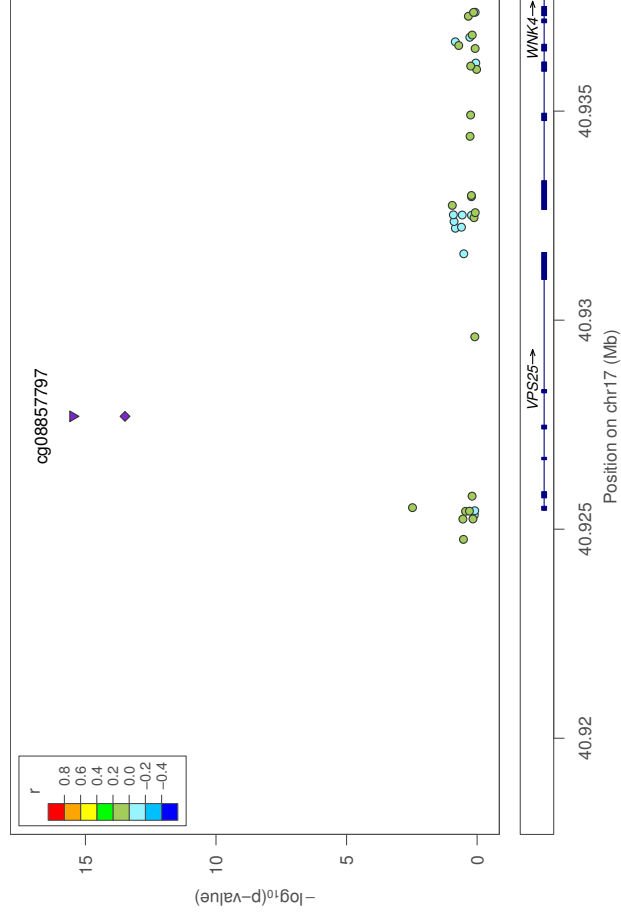

## MEOX1

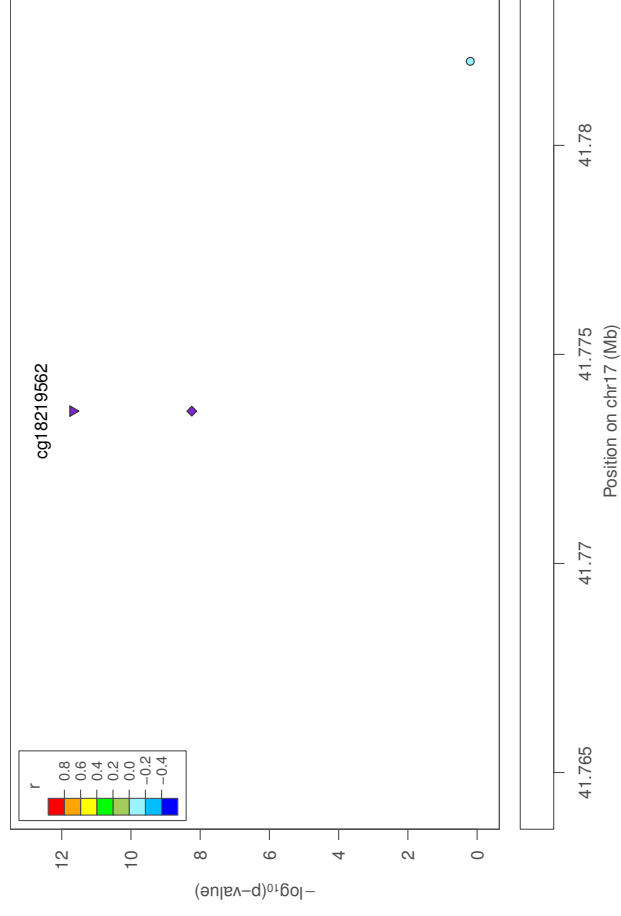

# NFE2L1

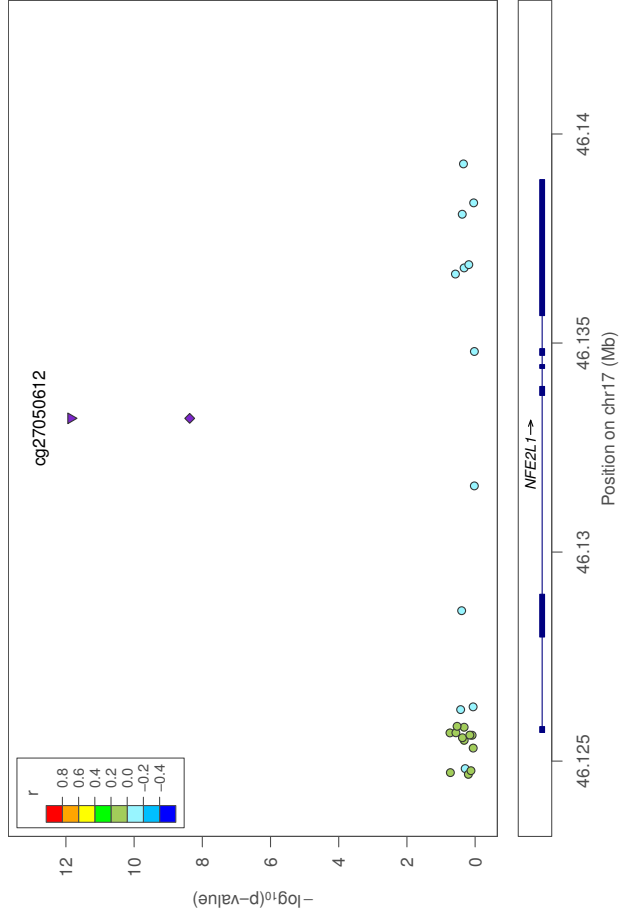

# PHOSPHO1

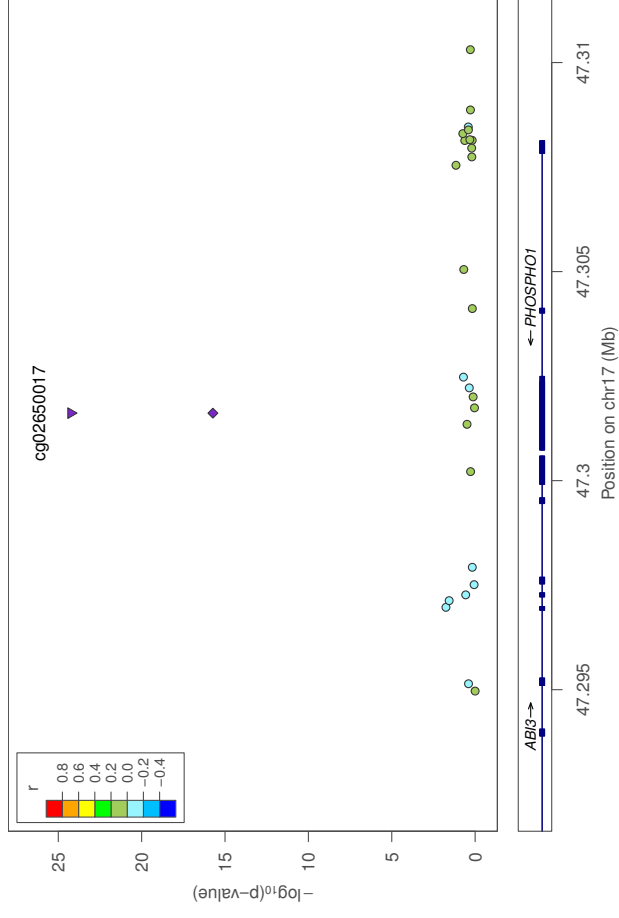

# VMP1

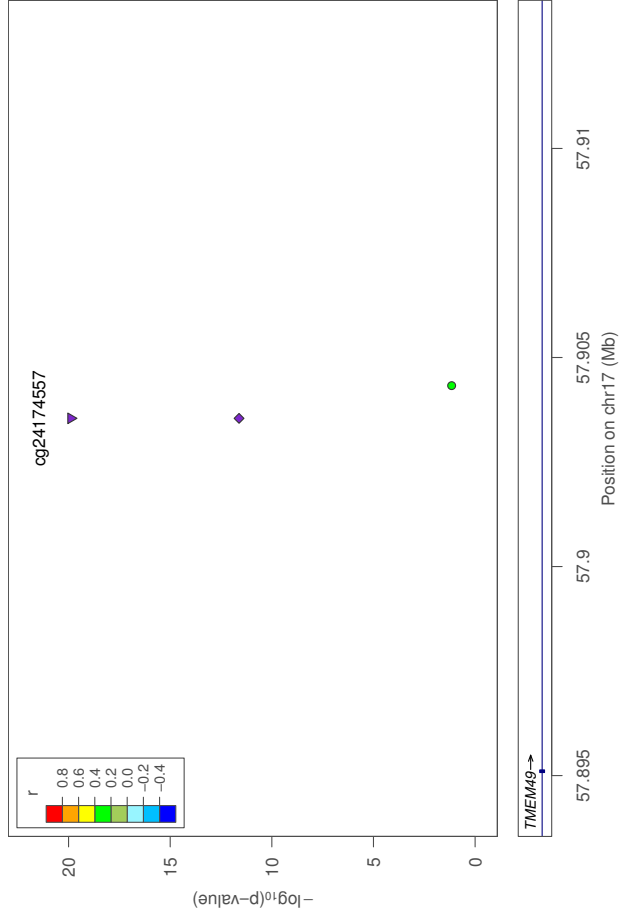

# CPSF4L

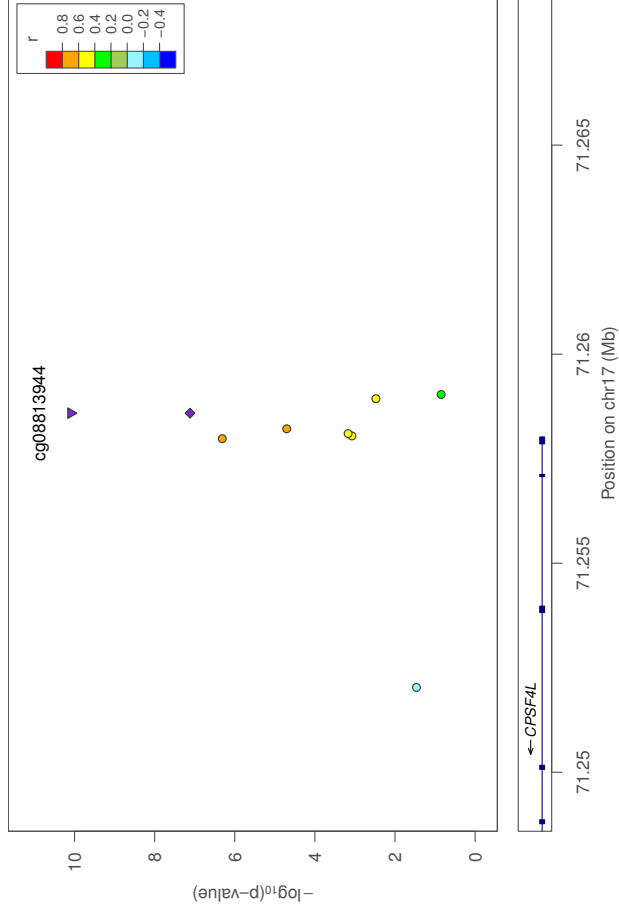

### SLC9A3R1

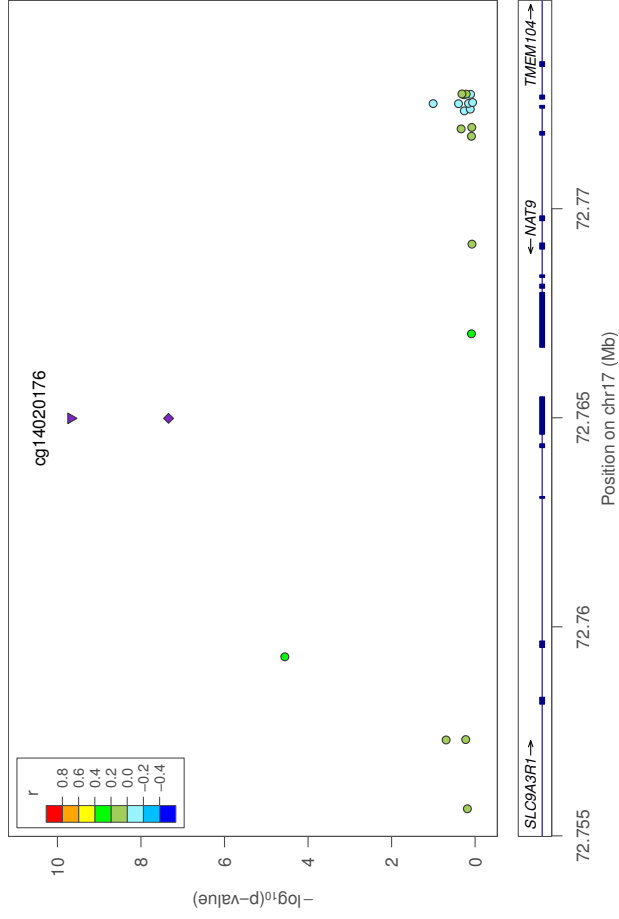

### RHBDF2

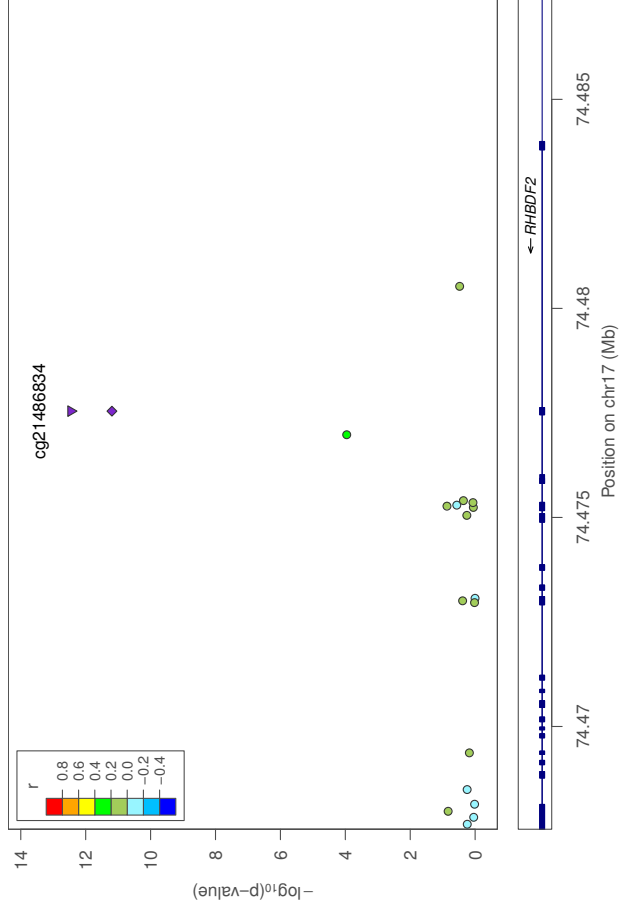

### SOCS3

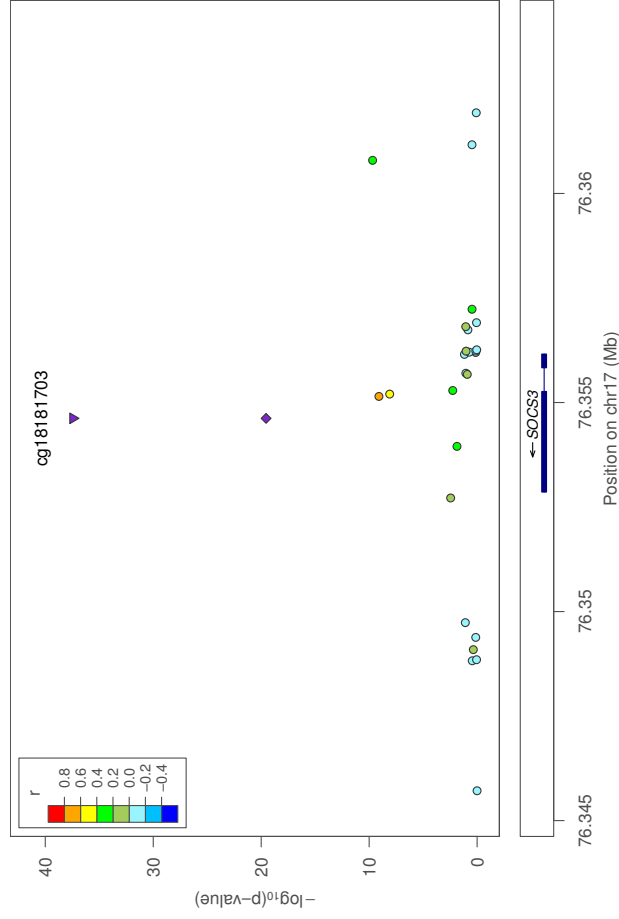

### LGALS3BP

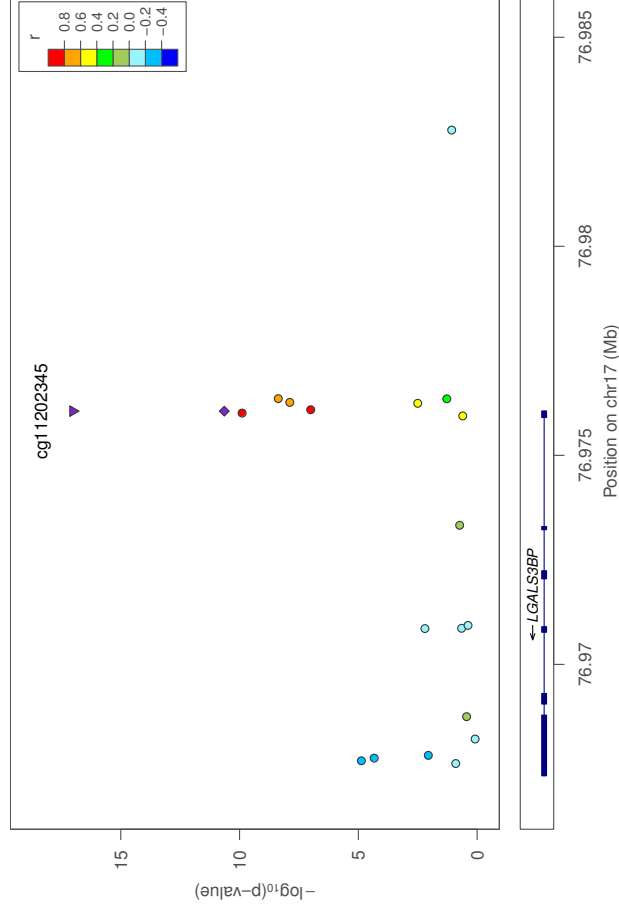

### P4HB

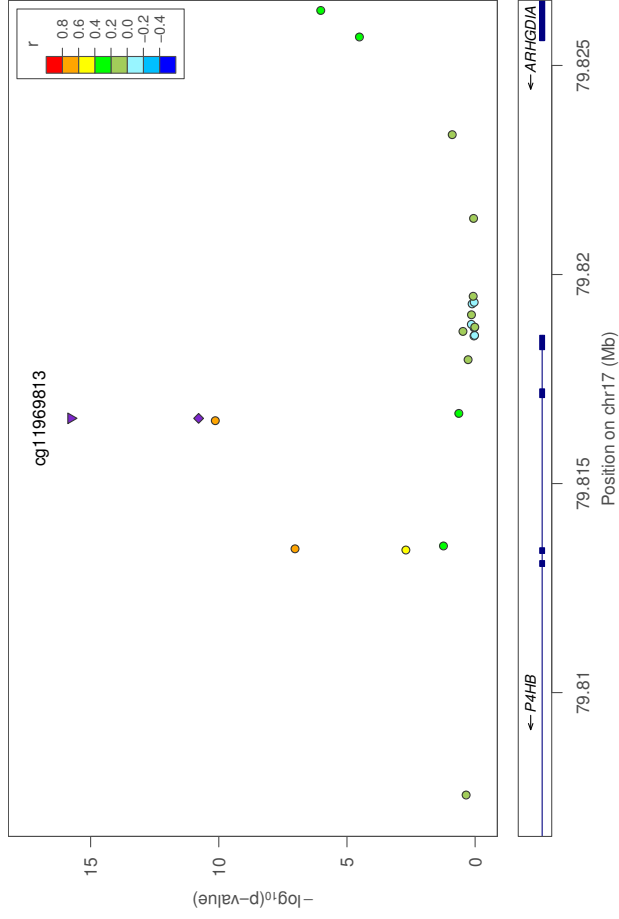

### SBNO2

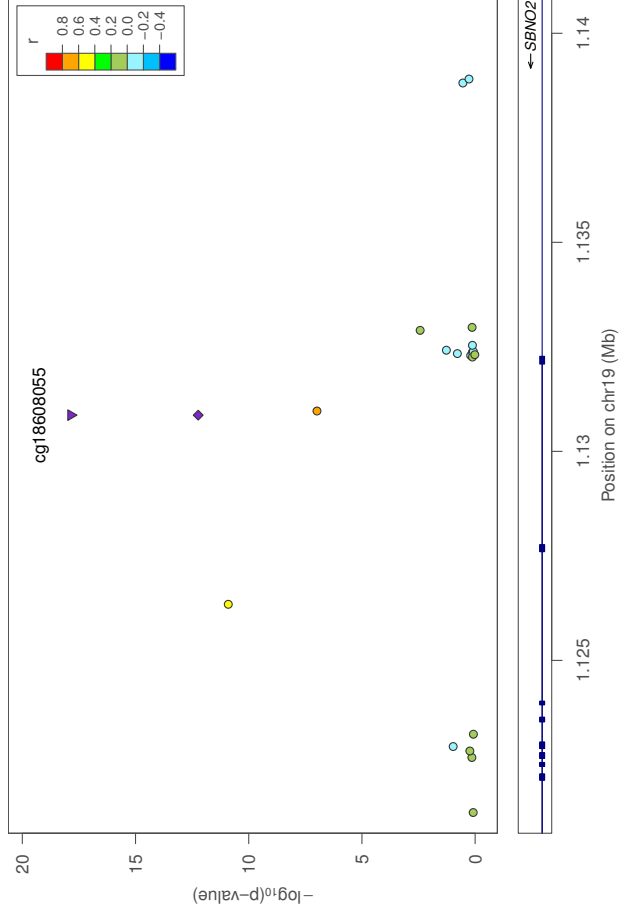

### CREB3L3

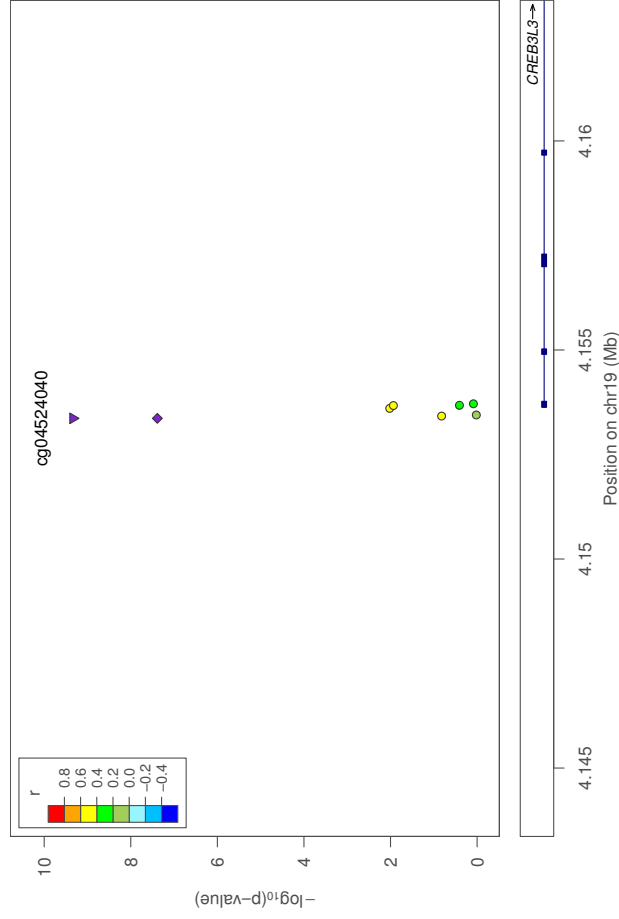

### ATG4D

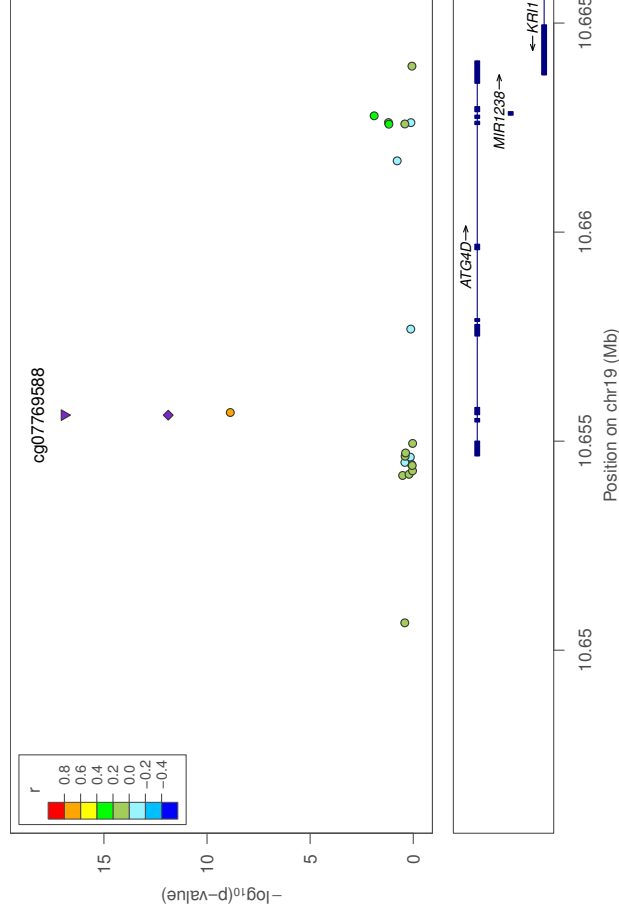

# MYO9B

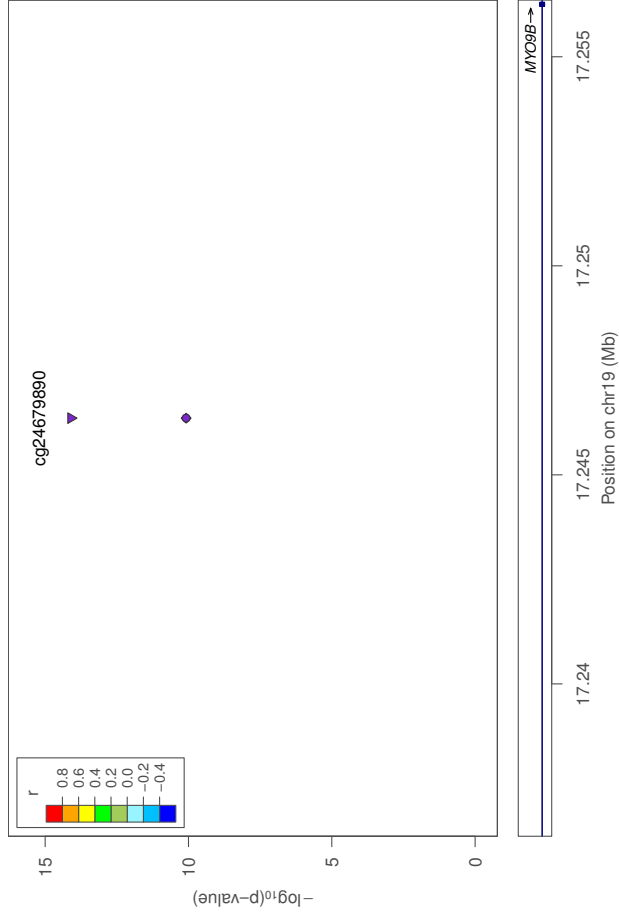

# DEDD2

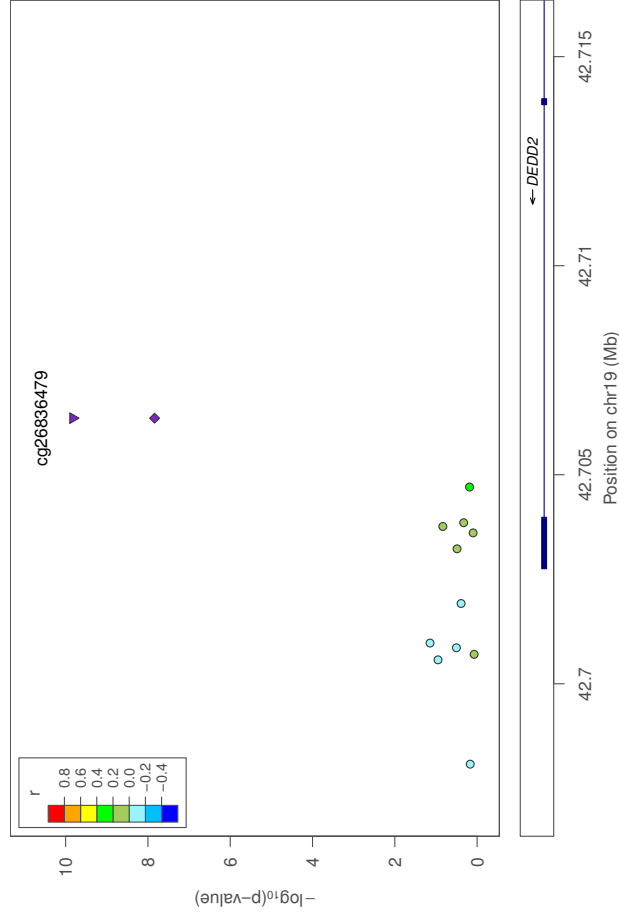

# PKN1

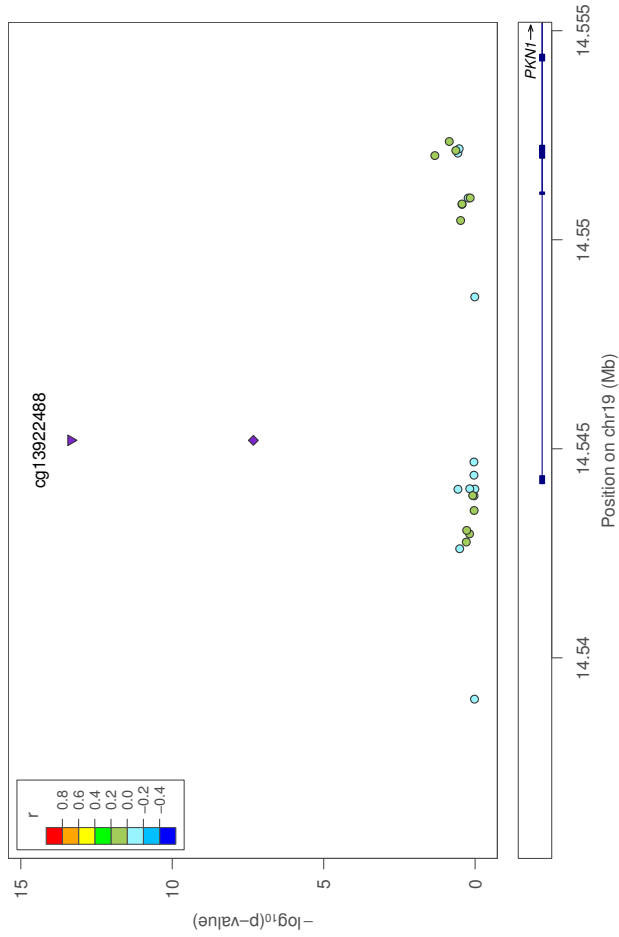

# UPF1

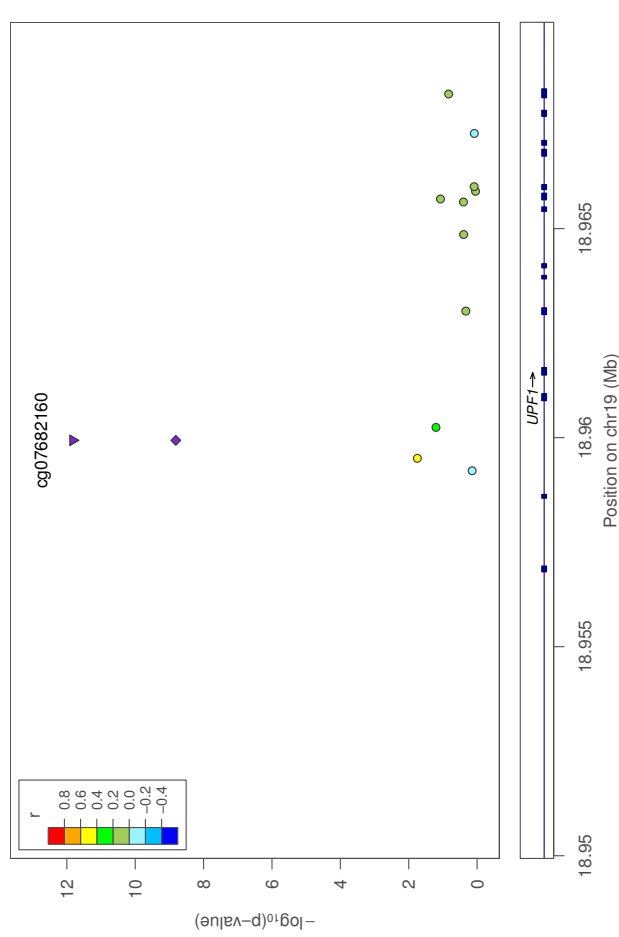

### BCL3

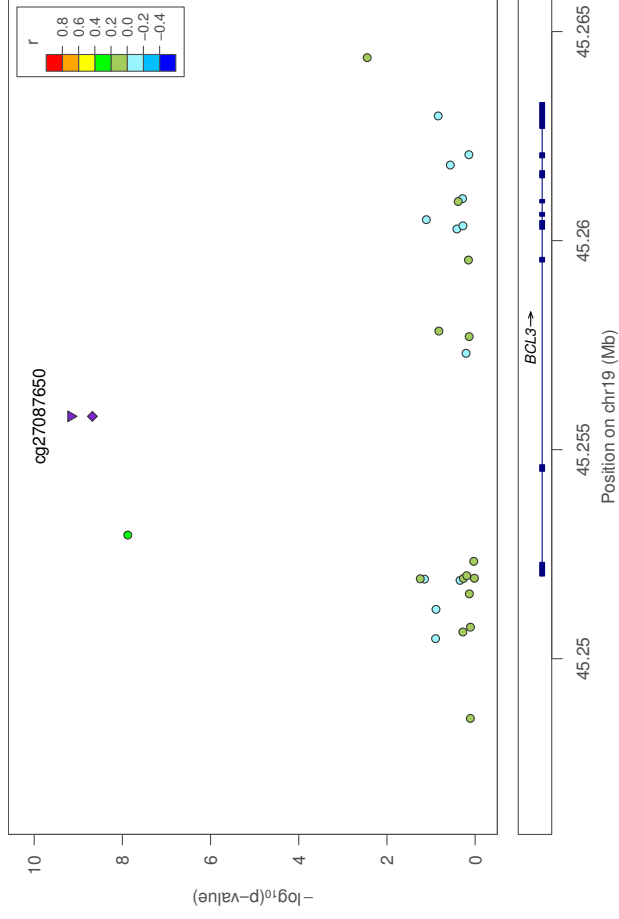

### SLC1A5

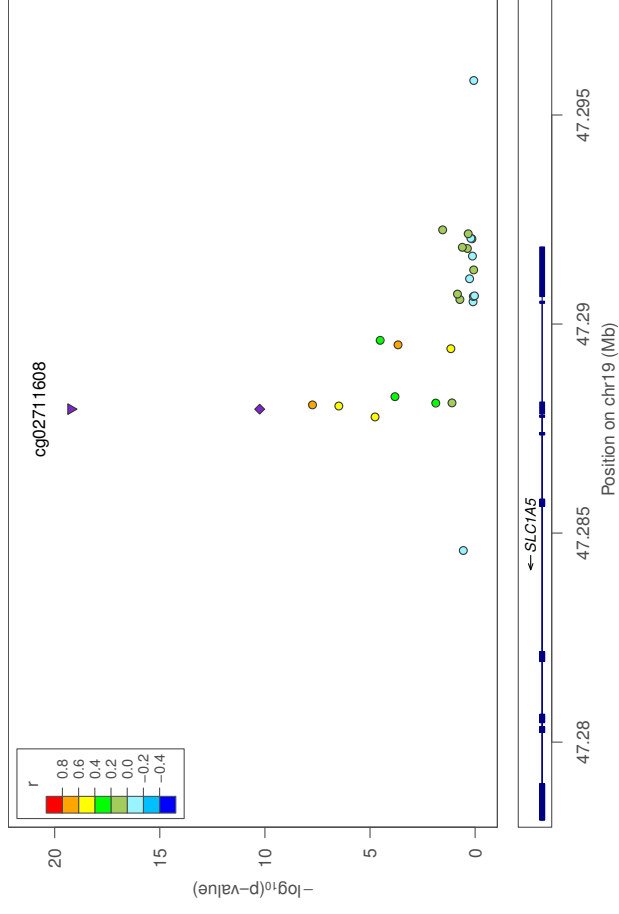

### ANGPT4

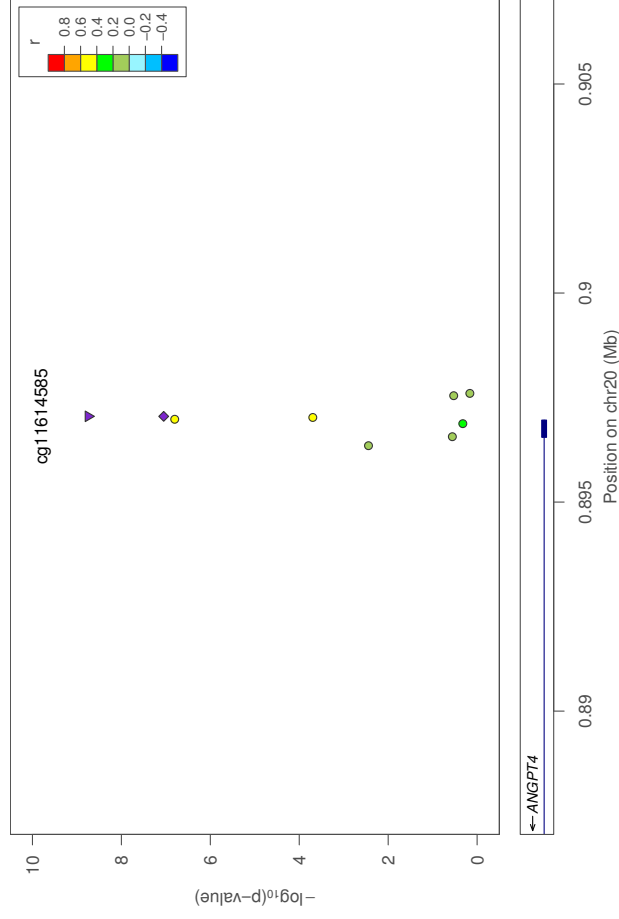

### PPIAP3

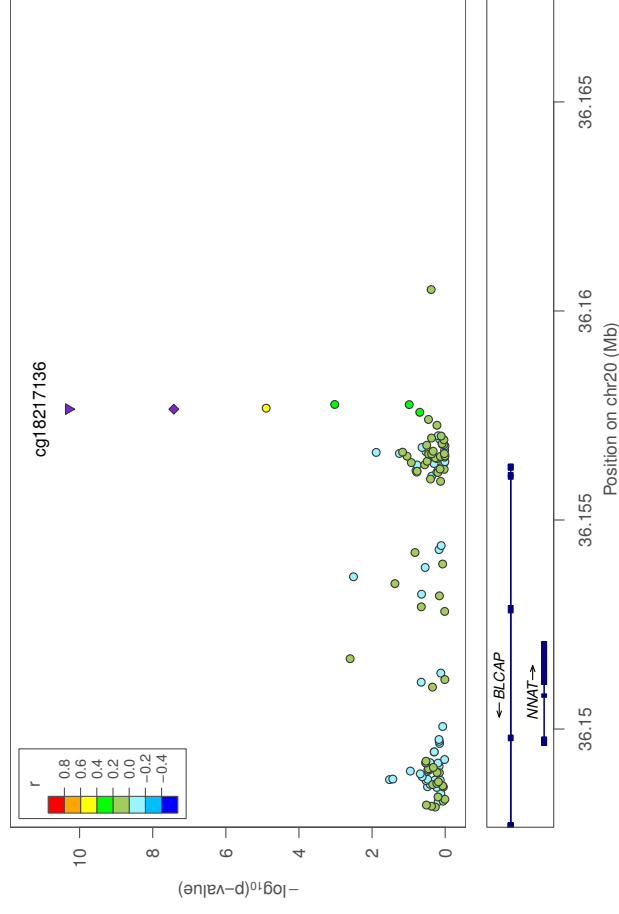

# TOX2

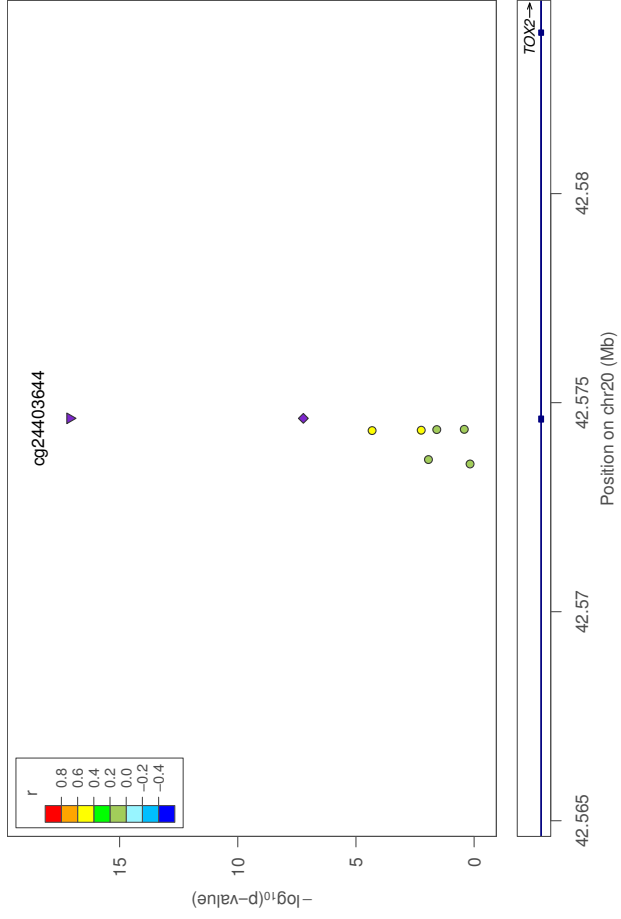

# LINC00649

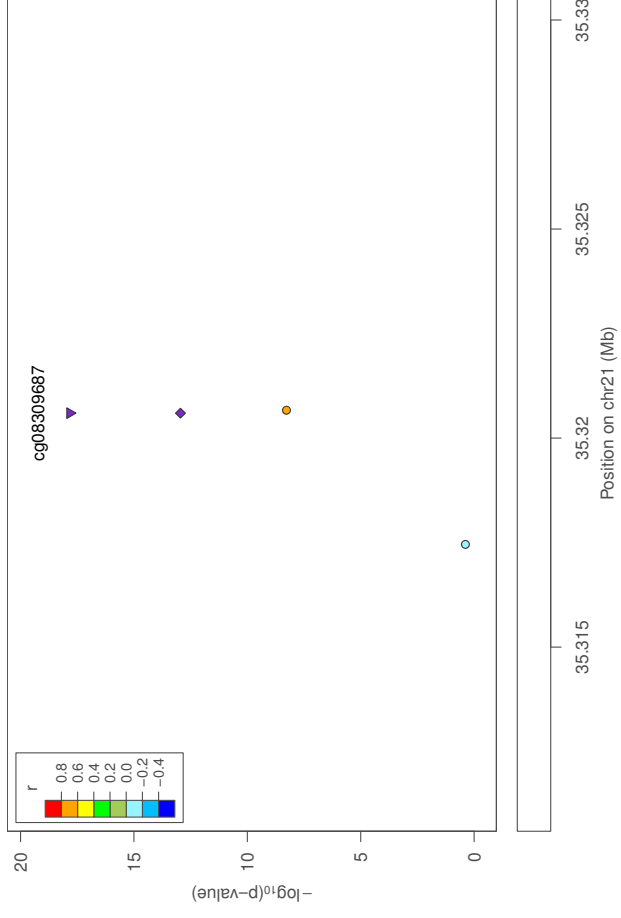

# ABCG1

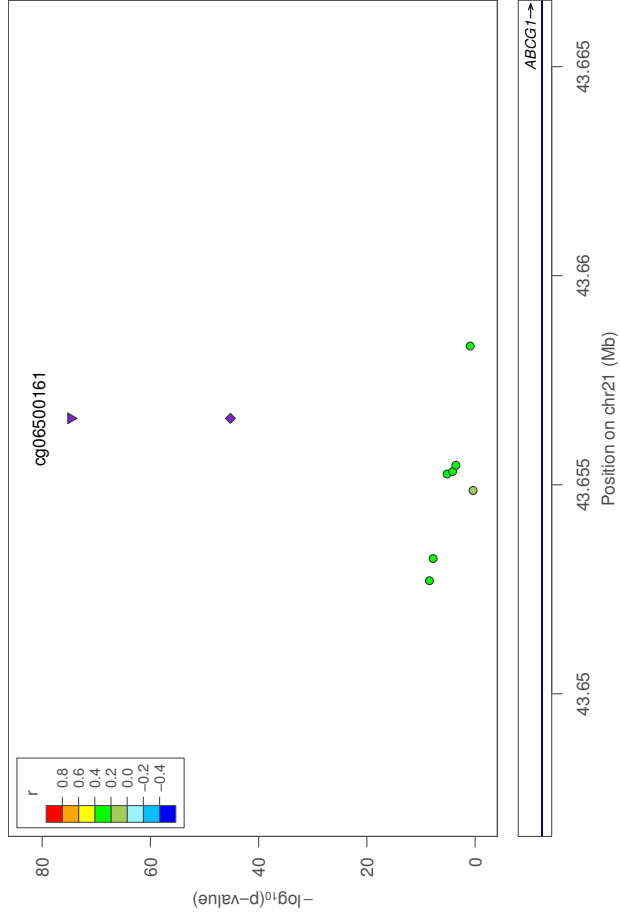

# PIK3IP1

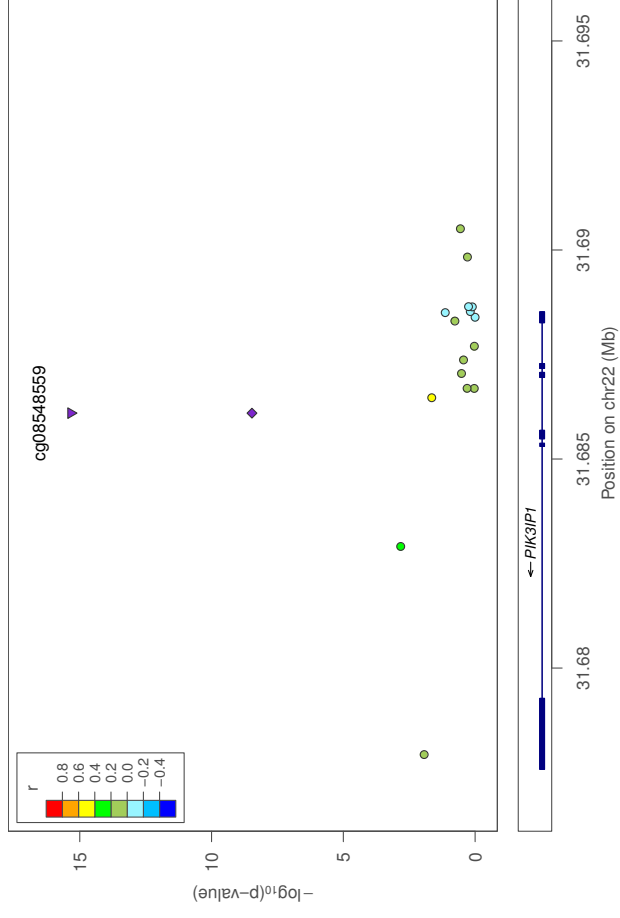

### CARD10

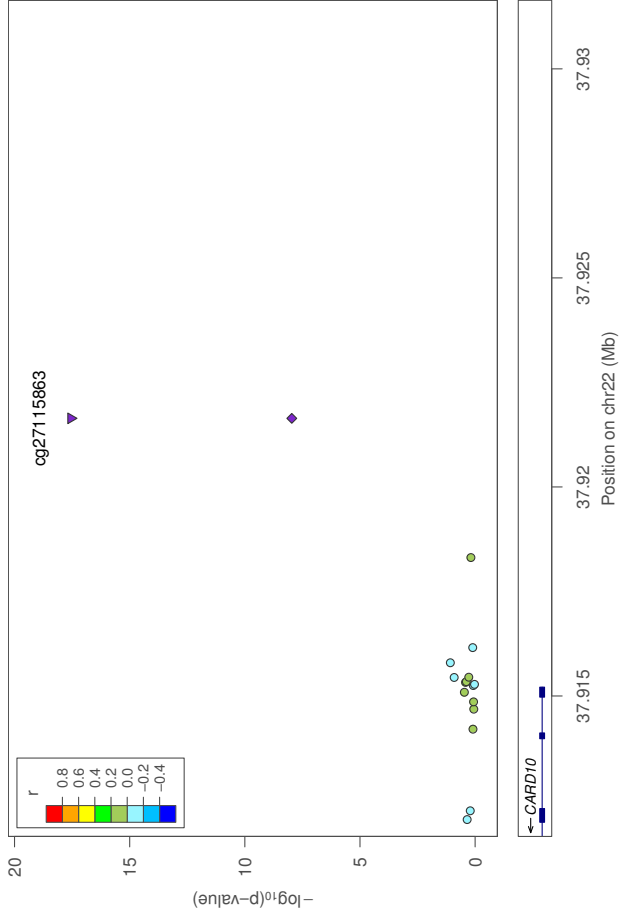

### TAB1

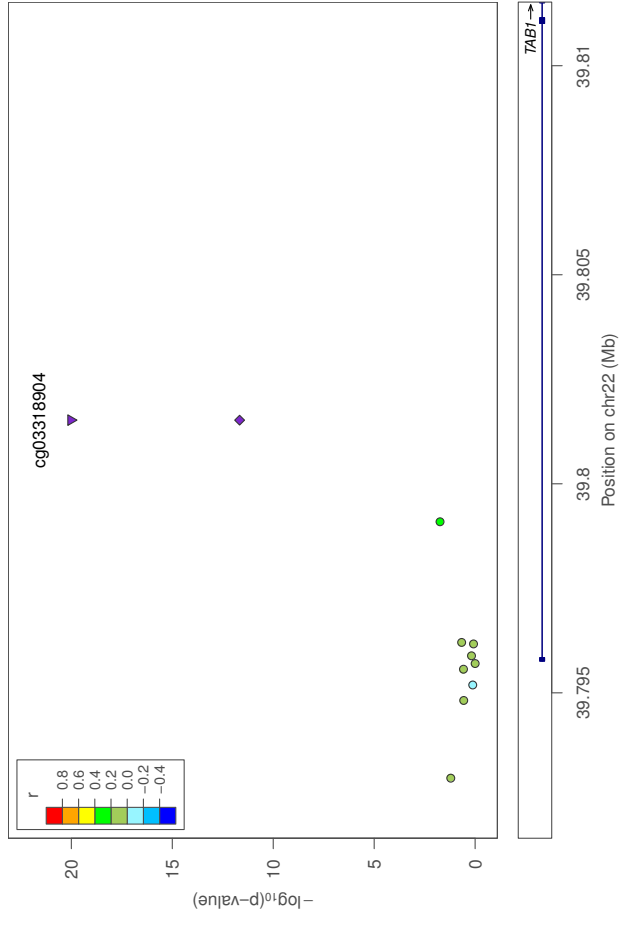

### CRELD2

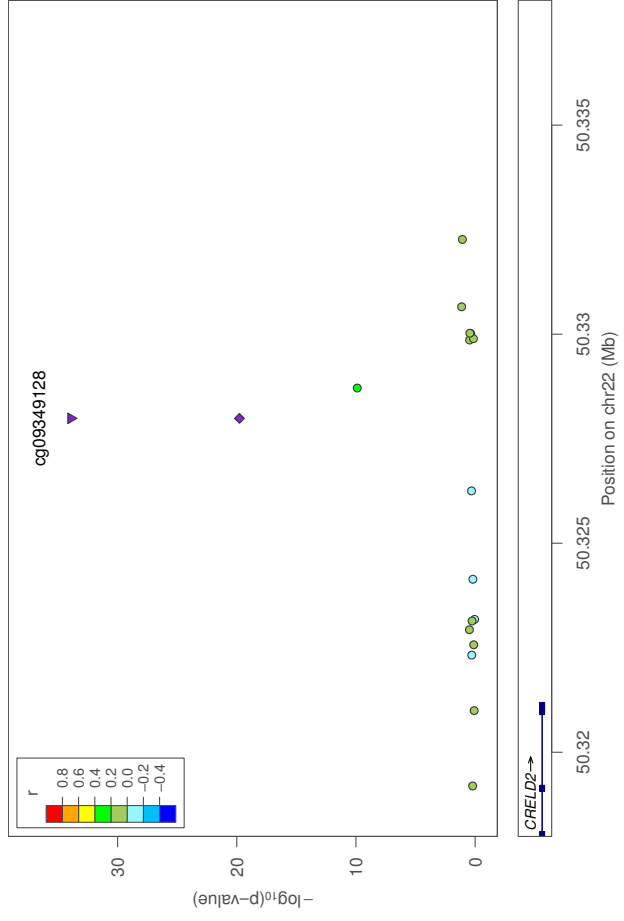

Supplement: NIHMS70428-supplement-Supplementary_Information_Figure_2.pdf [file NIHMS70428-supplement-Supplementary_Information_Figure_2.pdf]
